# Supplementary material
Source: ML conference proceedings conference paper supplement (https://proceedings.neurips.cc/paper_files/paper/2022/hash/1c8c87c36dc1e49e63555f95fa56b153-Abstract.html)
Supplement: Supplementary file 1 [file 1c8c87c36dc1e49e63555f95fa56b153-Supplemental-Conference.zip]

Archive with 3,154 entries (2,779 files):
- GOT-10k-Results/
- GOT-10k-Results/VLT_SCAR/
- GOT-10k-Results/VLT_SCAR/GOT-10k_Test_000001/
- GOT-10k-Results/VLT_SCAR/GOT-10k_Test_000001/GOT-10k_Test_000001_001.txt
- GOT-10k-Results/VLT_SCAR/GOT-10k_Test_000001/GOT-10k_Test_000001_time.txt
- GOT-10k-Results/VLT_SCAR/GOT-10k_Test_000002/
- GOT-10k-Results/VLT_SCAR/GOT-10k_Test_000002/GOT-10k_Test_000002_001.txt
- GOT-10k-Results/VLT_SCAR/GOT-10k_Test_000002/GOT-10k_Test_000002_time.txt
- GOT-10k-Results/VLT_SCAR/GOT-10k_Test_000003/
- GOT-10k-Results/VLT_SCAR/GOT-10k_Test_000003/GOT-10k_Test_000003_001.txt
- GOT-10k-Results/VLT_SCAR/GOT-10k_Test_000003/GOT-10k_Test_000003_time.txt
- GOT-10k-Results/VLT_SCAR/GOT-10k_Test_000004/
- GOT-10k-Results/VLT_SCAR/GOT-10k_Test_000004/GOT-10k_Test_000004_001.txt
- GOT-10k-Results/VLT_SCAR/GOT-10k_Test_000004/GOT-10k_Test_000004_time.txt
- GOT-10k-Results/VLT_SCAR/GOT-10k_Test_000005/
- GOT-10k-Results/VLT_SCAR/GOT-10k_Test_000005/GOT-10k_Test_000005_001.txt
- GOT-10k-Results/VLT_SCAR/GOT-10k_Test_000005/GOT-10k_Test_000005_time.txt
- GOT-10k-Results/VLT_SCAR/GOT-10k_Test_000006/
- GOT-10k-Results/VLT_SCAR/GOT-10k_Test_000006/GOT-10k_Test_000006_001.txt
- GOT-10k-Results/VLT_SCAR/GOT-10k_Test_000006/GOT-10k_Test_000006_time.txt
- GOT-10k-Results/VLT_SCAR/GOT-10k_Test_000007/
- GOT-10k-Results/VLT_SCAR/GOT-10k_Test_000007/GOT-10k_Test_000007_001.txt
- GOT-10k-Results/VLT_SCAR/GOT-10k_Test_000007/GOT-10k_Test_000007_time.txt
- GOT-10k-Results/VLT_SCAR/GOT-10k_Test_000008/
- GOT-10k-Results/VLT_SCAR/GOT-10k_Test_000008/GOT-10k_Test_000008_001.txt
- GOT-10k-Results/VLT_SCAR/GOT-10k_Test_000008/GOT-10k_Test_000008_time.txt
- GOT-10k-Results/VLT_SCAR/GOT-10k_Test_000009/
- GOT-10k-Results/VLT_SCAR/GOT-10k_Test_000009/GOT-10k_Test_000009_001.txt
- GOT-10k-Results/VLT_SCAR/GOT-10k_Test_000009/GOT-10k_Test_000009_time.txt
- GOT-10k-Results/VLT_SCAR/GOT-10k_Test_000010/
- GOT-10k-Results/VLT_SCAR/GOT-10k_Test_000010/GOT-10k_Test_000010_001.txt
- GOT-10k-Results/VLT_SCAR/GOT-10k_Test_000010/GOT-10k_Test_000010_time.txt
- GOT-10k-Results/VLT_SCAR/GOT-10k_Test_000011/
- GOT-10k-Results/VLT_SCAR/GOT-10k_Test_000011/GOT-10k_Test_000011_001.txt
- GOT-10k-Results/VLT_SCAR/GOT-10k_Test_000011/GOT-10k_Test_000011_time.txt
- GOT-10k-Results/VLT_SCAR/GOT-10k_Test_000012/
- GOT-10k-Results/VLT_SCAR/GOT-10k_Test_000012/GOT-10k_Test_000012_001.txt
- GOT-10k-Results/VLT_SCAR/GOT-10k_Test_000012/GOT-10k_Test_000012_time.txt
- GOT-10k-Results/VLT_SCAR/GOT-10k_Test_000013/
- GOT-10k-Results/VLT_SCAR/GOT-10k_Test_000013/GOT-10k_Test_000013_001.txt
- GOT-10k-Results/VLT_SCAR/GOT-10k_Test_000013/GOT-10k_Test_000013_time.txt
- GOT-10k-Results/VLT_SCAR/GOT-10k_Test_000014/
- GOT-10k-Results/VLT_SCAR/GOT-10k_Test_000014/GOT-10k_Test_000014_001.txt
- GOT-10k-Results/VLT_SCAR/GOT-10k_Test_000014/GOT-10k_Test_000014_time.txt
- GOT-10k-Results/VLT_SCAR/GOT-10k_Test_000015/
- GOT-10k-Results/VLT_SCAR/GOT-10k_Test_000015/GOT-10k_Test_000015_001.txt
- GOT-10k-Results/VLT_SCAR/GOT-10k_Test_000015/GOT-10k_Test_000015_time.txt
- GOT-10k-Results/VLT_SCAR/GOT-10k_Test_000016/
- GOT-10k-Results/VLT_SCAR/GOT-10k_Test_000016/GOT-10k_Test_000016_001.txt
- GOT-10k-Results/VLT_SCAR/GOT-10k_Test_000016/GOT-10k_Test_000016_time.txt
- GOT-10k-Results/VLT_SCAR/GOT-10k_Test_000017/
- GOT-10k-Results/VLT_SCAR/GOT-10k_Test_000017/GOT-10k_Test_000017_001.txt
- GOT-10k-Results/VLT_SCAR/GOT-10k_Test_000017/GOT-10k_Test_000017_time.txt
- GOT-10k-Results/VLT_SCAR/GOT-10k_Test_000018/
- GOT-10k-Results/VLT_SCAR/GOT-10k_Test_000018/GOT-10k_Test_000018_001.txt
- GOT-10k-Results/VLT_SCAR/GOT-10k_Test_000018/GOT-10k_Test_000018_time.txt
- GOT-10k-Results/VLT_SCAR/GOT-10k_Test_000019/
- GOT-10k-Results/VLT_SCAR/GOT-10k_Test_000019/GOT-10k_Test_000019_001.txt
- GOT-10k-Results/VLT_SCAR/GOT-10k_Test_000019/GOT-10k_Test_000019_time.txt
- GOT-10k-Results/VLT_SCAR/GOT-10k_Test_000020/
- GOT-10k-Results/VLT_SCAR/GOT-10k_Test_000020/GOT-10k_Test_000020_001.txt
- GOT-10k-Results/VLT_SCAR/GOT-10k_Test_000020/GOT-10k_Test_000020_time.txt
- GOT-10k-Results/VLT_SCAR/GOT-10k_Test_000021/
- GOT-10k-Results/VLT_SCAR/GOT-10k_Test_000021/GOT-10k_Test_000021_001.txt
- GOT-10k-Results/VLT_SCAR/GOT-10k_Test_000021/GOT-10k_Test_000021_time.txt
- GOT-10k-Results/VLT_SCAR/GOT-10k_Test_000022/
- GOT-10k-Results/VLT_SCAR/GOT-10k_Test_000022/GOT-10k_Test_000022_001.txt
- GOT-10k-Results/VLT_SCAR/GOT-10k_Test_000022/GOT-10k_Test_000022_time.txt
- GOT-10k-Results/VLT_SCAR/GOT-10k_Test_000023/
- GOT-10k-Results/VLT_SCAR/GOT-10k_Test_000023/GOT-10k_Test_000023_001.txt
- GOT-10k-Results/VLT_SCAR/GOT-10k_Test_000023/GOT-10k_Test_000023_time.txt
- GOT-10k-Results/VLT_SCAR/GOT-10k_Test_000024/
- GOT-10k-Results/VLT_SCAR/GOT-10k_Test_000024/GOT-10k_Test_000024_001.txt
- GOT-10k-Results/VLT_SCAR/GOT-10k_Test_000024/GOT-10k_Test_000024_time.txt
- GOT-10k-Results/VLT_SCAR/GOT-10k_Test_000025/
- GOT-10k-Results/VLT_SCAR/GOT-10k_Test_000025/GOT-10k_Test_000025_001.txt
- GOT-10k-Results/VLT_SCAR/GOT-10k_Test_000025/GOT-10k_Test_000025_time.txt
- GOT-10k-Results/VLT_SCAR/GOT-10k_Test_000026/
- GOT-10k-Results/VLT_SCAR/GOT-10k_Test_000026/GOT-10k_Test_000026_001.txt
- GOT-10k-Results/VLT_SCAR/GOT-10k_Test_000026/GOT-10k_Test_000026_time.txt
- GOT-10k-Results/VLT_SCAR/GOT-10k_Test_000027/
- GOT-10k-Results/VLT_SCAR/GOT-10k_Test_000027/GOT-10k_Test_000027_001.txt
- GOT-10k-Results/VLT_SCAR/GOT-10k_Test_000027/GOT-10k_Test_000027_time.txt
- GOT-10k-Results/VLT_SCAR/GOT-10k_Test_000028/
- GOT-10k-Results/VLT_SCAR/GOT-10k_Test_000028/GOT-10k_Test_000028_001.txt
- GOT-10k-Results/VLT_SCAR/GOT-10k_Test_000028/GOT-10k_Test_000028_time.txt
- GOT-10k-Results/VLT_SCAR/GOT-10k_Test_000029/
- GOT-10k-Results/VLT_SCAR/GOT-10k_Test_000029/GOT-10k_Test_000029_001.txt
- GOT-10k-Results/VLT_SCAR/GOT-10k_Test_000029/GOT-10k_Test_000029_time.txt
- GOT-10k-Results/VLT_SCAR/GOT-10k_Test_000030/
- GOT-10k-Results/VLT_SCAR/GOT-10k_Test_000030/GOT-10k_Test_000030_001.txt
- GOT-10k-Results/VLT_SCAR/GOT-10k_Test_000030/GOT-10k_Test_000030_time.txt
- GOT-10k-Results/VLT_SCAR/GOT-10k_Test_000031/
- GOT-10k-Results/VLT_SCAR/GOT-10k_Test_000031/GOT-10k_Test_000031_001.txt
- GOT-10k-Results/VLT_SCAR/GOT-10k_Test_000031/GOT-10k_Test_000031_time.txt
- GOT-10k-Results/VLT_SCAR/GOT-10k_Test_000032/
- GOT-10k-Results/VLT_SCAR/GOT-10k_Test_000032/GOT-10k_Test_000032_001.txt
- GOT-10k-Results/VLT_SCAR/GOT-10k_Test_000032/GOT-10k_Test_000032_time.txt
- GOT-10k-Results/VLT_SCAR/GOT-10k_Test_000033/
- GOT-10k-Results/VLT_SCAR/GOT-10k_Test_000033/GOT-10k_Test_000033_001.txt
- GOT-10k-Results/VLT_SCAR/GOT-10k_Test_000033/GOT-10k_Test_000033_time.txt
- GOT-10k-Results/VLT_SCAR/GOT-10k_Test_000034/
- GOT-10k-Results/VLT_SCAR/GOT-10k_Test_000034/GOT-10k_Test_000034_001.txt
- GOT-10k-Results/VLT_SCAR/GOT-10k_Test_000034/GOT-10k_Test_000034_time.txt
- GOT-10k-Results/VLT_SCAR/GOT-10k_Test_000035/
- GOT-10k-Results/VLT_SCAR/GOT-10k_Test_000035/GOT-10k_Test_000035_001.txt
- GOT-10k-Results/VLT_SCAR/GOT-10k_Test_000035/GOT-10k_Test_000035_time.txt
- GOT-10k-Results/VLT_SCAR/GOT-10k_Test_000036/
- GOT-10k-Results/VLT_SCAR/GOT-10k_Test_000036/GOT-10k_Test_000036_001.txt
- GOT-10k-Results/VLT_SCAR/GOT-10k_Test_000036/GOT-10k_Test_000036_time.txt
- GOT-10k-Results/VLT_SCAR/GOT-10k_Test_000037/
- GOT-10k-Results/VLT_SCAR/GOT-10k_Test_000037/GOT-10k_Test_000037_001.txt
- GOT-10k-Results/VLT_SCAR/GOT-10k_Test_000037/GOT-10k_Test_000037_time.txt
- GOT-10k-Results/VLT_SCAR/GOT-10k_Test_000038/
- GOT-10k-Results/VLT_SCAR/GOT-10k_Test_000038/GOT-10k_Test_000038_001.txt
- GOT-10k-Results/VLT_SCAR/GOT-10k_Test_000038/GOT-10k_Test_000038_time.txt
- GOT-10k-Results/VLT_SCAR/GOT-10k_Test_000039/
- GOT-10k-Results/VLT_SCAR/GOT-10k_Test_000039/GOT-10k_Test_000039_001.txt
- GOT-10k-Results/VLT_SCAR/GOT-10k_Test_000039/GOT-10k_Test_000039_time.txt
- GOT-10k-Results/VLT_SCAR/GOT-10k_Test_000040/
- GOT-10k-Results/VLT_SCAR/GOT-10k_Test_000040/GOT-10k_Test_000040_001.txt
- GOT-10k-Results/VLT_SCAR/GOT-10k_Test_000040/GOT-10k_Test_000040_time.txt
- GOT-10k-Results/VLT_SCAR/GOT-10k_Test_000041/
- GOT-10k-Results/VLT_SCAR/GOT-10k_Test_000041/GOT-10k_Test_000041_001.txt
- GOT-10k-Results/VLT_SCAR/GOT-10k_Test_000041/GOT-10k_Test_000041_time.txt
- GOT-10k-Results/VLT_SCAR/GOT-10k_Test_000042/
- GOT-10k-Results/VLT_SCAR/GOT-10k_Test_000042/GOT-10k_Test_000042_001.txt
- GOT-10k-Results/VLT_SCAR/GOT-10k_Test_000042/GOT-10k_Test_000042_time.txt
- GOT-10k-Results/VLT_SCAR/GOT-10k_Test_000043/
- GOT-10k-Results/VLT_SCAR/GOT-10k_Test_000043/GOT-10k_Test_000043_001.txt
- GOT-10k-Results/VLT_SCAR/GOT-10k_Test_000043/GOT-10k_Test_000043_time.txt
- GOT-10k-Results/VLT_SCAR/GOT-10k_Test_000044/
- GOT-10k-Results/VLT_SCAR/GOT-10k_Test_000044/GOT-10k_Test_000044_001.txt
- GOT-10k-Results/VLT_SCAR/GOT-10k_Test_000044/GOT-10k_Test_000044_time.txt
- GOT-10k-Results/VLT_SCAR/GOT-10k_Test_000045/
- GOT-10k-Results/VLT_SCAR/GOT-10k_Test_000045/GOT-10k_Test_000045_001.txt
- GOT-10k-Results/VLT_SCAR/GOT-10k_Test_000045/GOT-10k_Test_000045_time.txt
- GOT-10k-Results/VLT_SCAR/GOT-10k_Test_000046/
- GOT-10k-Results/VLT_SCAR/GOT-10k_Test_000046/GOT-10k_Test_000046_001.txt
- GOT-10k-Results/VLT_SCAR/GOT-10k_Test_000046/GOT-10k_Test_000046_time.txt
- GOT-10k-Results/VLT_SCAR/GOT-10k_Test_000047/
- GOT-10k-Results/VLT_SCAR/GOT-10k_Test_000047/GOT-10k_Test_000047_001.txt
- GOT-10k-Results/VLT_SCAR/GOT-10k_Test_000047/GOT-10k_Test_000047_time.txt
- GOT-10k-Results/VLT_SCAR/GOT-10k_Test_000048/
- GOT-10k-Results/VLT_SCAR/GOT-10k_Test_000048/GOT-10k_Test_000048_001.txt
- GOT-10k-Results/VLT_SCAR/GOT-10k_Test_000048/GOT-10k_Test_000048_time.txt
- GOT-10k-Results/VLT_SCAR/GOT-10k_Test_000049/
- GOT-10k-Results/VLT_SCAR/GOT-10k_Test_000049/GOT-10k_Test_000049_001.txt
- GOT-10k-Results/VLT_SCAR/GOT-10k_Test_000049/GOT-10k_Test_000049_time.txt
- GOT-10k-Results/VLT_SCAR/GOT-10k_Test_000050/
- GOT-10k-Results/VLT_SCAR/GOT-10k_Test_000050/GOT-10k_Test_000050_001.txt
- GOT-10k-Results/VLT_SCAR/GOT-10k_Test_000050/GOT-10k_Test_000050_time.txt
- GOT-10k-Results/VLT_SCAR/GOT-10k_Test_000051/
- GOT-10k-Results/VLT_SCAR/GOT-10k_Test_000051/GOT-10k_Test_000051_001.txt
- GOT-10k-Results/VLT_SCAR/GOT-10k_Test_000051/GOT-10k_Test_000051_time.txt
- GOT-10k-Results/VLT_SCAR/GOT-10k_Test_000052/
- GOT-10k-Results/VLT_SCAR/GOT-10k_Test_000052/GOT-10k_Test_000052_001.txt
- GOT-10k-Results/VLT_SCAR/GOT-10k_Test_000052/GOT-10k_Test_000052_time.txt
- GOT-10k-Results/VLT_SCAR/GOT-10k_Test_000053/
- GOT-10k-Results/VLT_SCAR/GOT-10k_Test_000053/GOT-10k_Test_000053_001.txt
- GOT-10k-Results/VLT_SCAR/GOT-10k_Test_000053/GOT-10k_Test_000053_time.txt
- GOT-10k-Results/VLT_SCAR/GOT-10k_Test_000054/
- GOT-10k-Results/VLT_SCAR/GOT-10k_Test_000054/GOT-10k_Test_000054_001.txt
- GOT-10k-Results/VLT_SCAR/GOT-10k_Test_000054/GOT-10k_Test_000054_time.txt
- GOT-10k-Results/VLT_SCAR/GOT-10k_Test_000055/
- GOT-10k-Results/VLT_SCAR/GOT-10k_Test_000055/GOT-10k_Test_000055_001.txt
- GOT-10k-Results/VLT_SCAR/GOT-10k_Test_000055/GOT-10k_Test_000055_time.txt
- GOT-10k-Results/VLT_SCAR/GOT-10k_Test_000056/
- GOT-10k-Results/VLT_SCAR/GOT-10k_Test_000056/GOT-10k_Test_000056_001.txt
- GOT-10k-Results/VLT_SCAR/GOT-10k_Test_000056/GOT-10k_Test_000056_time.txt
- GOT-10k-Results/VLT_SCAR/GOT-10k_Test_000057/
- GOT-10k-Results/VLT_SCAR/GOT-10k_Test_000057/GOT-10k_Test_000057_001.txt
- GOT-10k-Results/VLT_SCAR/GOT-10k_Test_000057/GOT-10k_Test_000057_time.txt
- GOT-10k-Results/VLT_SCAR/GOT-10k_Test_000058/
- GOT-10k-Results/VLT_SCAR/GOT-10k_Test_000058/GOT-10k_Test_000058_001.txt
- GOT-10k-Results/VLT_SCAR/GOT-10k_Test_000058/GOT-10k_Test_000058_time.txt
- GOT-10k-Results/VLT_SCAR/GOT-10k_Test_000059/
- GOT-10k-Results/VLT_SCAR/GOT-10k_Test_000059/GOT-10k_Test_000059_001.txt
- GOT-10k-Results/VLT_SCAR/GOT-10k_Test_000059/GOT-10k_Test_000059_time.txt
- GOT-10k-Results/VLT_SCAR/GOT-10k_Test_000060/
- GOT-10k-Results/VLT_SCAR/GOT-10k_Test_000060/GOT-10k_Test_000060_001.txt
- GOT-10k-Results/VLT_SCAR/GOT-10k_Test_000060/GOT-10k_Test_000060_time.txt
- GOT-10k-Results/VLT_SCAR/GOT-10k_Test_000061/
- GOT-10k-Results/VLT_SCAR/GOT-10k_Test_000061/GOT-10k_Test_000061_001.txt
- GOT-10k-Results/VLT_SCAR/GOT-10k_Test_000061/GOT-10k_Test_000061_time.txt
- GOT-10k-Results/VLT_SCAR/GOT-10k_Test_000062/
- GOT-10k-Results/VLT_SCAR/GOT-10k_Test_000062/GOT-10k_Test_000062_001.txt
- GOT-10k-Results/VLT_SCAR/GOT-10k_Test_000062/GOT-10k_Test_000062_time.txt
- GOT-10k-Results/VLT_SCAR/GOT-10k_Test_000063/
- GOT-10k-Results/VLT_SCAR/GOT-10k_Test_000063/GOT-10k_Test_000063_001.txt
- GOT-10k-Results/VLT_SCAR/GOT-10k_Test_000063/GOT-10k_Test_000063_time.txt
- GOT-10k-Results/VLT_SCAR/GOT-10k_Test_000064/
- GOT-10k-Results/VLT_SCAR/GOT-10k_Test_000064/GOT-10k_Test_000064_001.txt
- GOT-10k-Results/VLT_SCAR/GOT-10k_Test_000064/GOT-10k_Test_000064_time.txt
- GOT-10k-Results/VLT_SCAR/GOT-10k_Test_000065/
- GOT-10k-Results/VLT_SCAR/GOT-10k_Test_000065/GOT-10k_Test_000065_001.txt
- GOT-10k-Results/VLT_SCAR/GOT-10k_Test_000065/GOT-10k_Test_000065_time.txt
- GOT-10k-Results/VLT_SCAR/GOT-10k_Test_000066/
- GOT-10k-Results/VLT_SCAR/GOT-10k_Test_000066/GOT-10k_Test_000066_001.txt
- GOT-10k-Results/VLT_SCAR/GOT-10k_Test_000066/GOT-10k_Test_000066_time.txt
- GOT-10k-Results/VLT_SCAR/GOT-10k_Test_000067/
- GOT-10k-Results/VLT_SCAR/GOT-10k_Test_000067/GOT-10k_Test_000067_001.txt
- GOT-10k-Results/VLT_SCAR/GOT-10k_Test_000067/GOT-10k_Test_000067_time.txt
- GOT-10k-Results/VLT_SCAR/GOT-10k_Test_000068/
- GOT-10k-Results/VLT_SCAR/GOT-10k_Test_000068/GOT-10k_Test_000068_001.txt
- GOT-10k-Results/VLT_SCAR/GOT-10k_Test_000068/GOT-10k_Test_000068_time.txt
- GOT-10k-Results/VLT_SCAR/GOT-10k_Test_000069/
- GOT-10k-Results/VLT_SCAR/GOT-10k_Test_000069/GOT-10k_Test_000069_001.txt
- GOT-10k-Results/VLT_SCAR/GOT-10k_Test_000069/GOT-10k_Test_000069_time.txt
- GOT-10k-Results/VLT_SCAR/GOT-10k_Test_000070/
- GOT-10k-Results/VLT_SCAR/GOT-10k_Test_000070/GOT-10k_Test_000070_001.txt
- GOT-10k-Results/VLT_SCAR/GOT-10k_Test_000070/GOT-10k_Test_000070_time.txt
- GOT-10k-Results/VLT_SCAR/GOT-10k_Test_000071/
- GOT-10k-Results/VLT_SCAR/GOT-10k_Test_000071/GOT-10k_Test_000071_001.txt
- GOT-10k-Results/VLT_SCAR/GOT-10k_Test_000071/GOT-10k_Test_000071_time.txt
- GOT-10k-Results/VLT_SCAR/GOT-10k_Test_000072/
- GOT-10k-Results/VLT_SCAR/GOT-10k_Test_000072/GOT-10k_Test_000072_001.txt
- GOT-10k-Results/VLT_SCAR/GOT-10k_Test_000072/GOT-10k_Test_000072_time.txt
- GOT-10k-Results/VLT_SCAR/GOT-10k_Test_000073/
- GOT-10k-Results/VLT_SCAR/GOT-10k_Test_000073/GOT-10k_Test_000073_001.txt
- GOT-10k-Results/VLT_SCAR/GOT-10k_Test_000073/GOT-10k_Test_000073_time.txt
- GOT-10k-Results/VLT_SCAR/GOT-10k_Test_000074/
- GOT-10k-Results/VLT_SCAR/GOT-10k_Test_000074/GOT-10k_Test_000074_001.txt
- GOT-10k-Results/VLT_SCAR/GOT-10k_Test_000074/GOT-10k_Test_000074_time.txt
- GOT-10k-Results/VLT_SCAR/GOT-10k_Test_000075/
- GOT-10k-Results/VLT_SCAR/GOT-10k_Test_000075/GOT-10k_Test_000075_001.txt
- GOT-10k-Results/VLT_SCAR/GOT-10k_Test_000075/GOT-10k_Test_000075_time.txt
- GOT-10k-Results/VLT_SCAR/GOT-10k_Test_000076/
- GOT-10k-Results/VLT_SCAR/GOT-10k_Test_000076/GOT-10k_Test_000076_001.txt
- GOT-10k-Results/VLT_SCAR/GOT-10k_Test_000076/GOT-10k_Test_000076_time.txt
- GOT-10k-Results/VLT_SCAR/GOT-10k_Test_000077/
- GOT-10k-Results/VLT_SCAR/GOT-10k_Test_000077/GOT-10k_Test_000077_001.txt
- GOT-10k-Results/VLT_SCAR/GOT-10k_Test_000077/GOT-10k_Test_000077_time.txt
- GOT-10k-Results/VLT_SCAR/GOT-10k_Test_000078/
- GOT-10k-Results/VLT_SCAR/GOT-10k_Test_000078/GOT-10k_Test_000078_001.txt
- GOT-10k-Results/VLT_SCAR/GOT-10k_Test_000078/GOT-10k_Test_000078_time.txt
- GOT-10k-Results/VLT_SCAR/GOT-10k_Test_000079/
- GOT-10k-Results/VLT_SCAR/GOT-10k_Test_000079/GOT-10k_Test_000079_001.txt
- GOT-10k-Results/VLT_SCAR/GOT-10k_Test_000079/GOT-10k_Test_000079_time.txt
- GOT-10k-Results/VLT_SCAR/GOT-10k_Test_000080/
- GOT-10k-Results/VLT_SCAR/GOT-10k_Test_000080/GOT-10k_Test_000080_001.txt
- GOT-10k-Results/VLT_SCAR/GOT-10k_Test_000080/GOT-10k_Test_000080_time.txt
- GOT-10k-Results/VLT_SCAR/GOT-10k_Test_000081/
- GOT-10k-Results/VLT_SCAR/GOT-10k_Test_000081/GOT-10k_Test_000081_001.txt
- GOT-10k-Results/VLT_SCAR/GOT-10k_Test_000081/GOT-10k_Test_000081_time.txt
- GOT-10k-Results/VLT_SCAR/GOT-10k_Test_000082/
- GOT-10k-Results/VLT_SCAR/GOT-10k_Test_000082/GOT-10k_Test_000082_001.txt
- GOT-10k-Results/VLT_SCAR/GOT-10k_Test_000082/GOT-10k_Test_000082_time.txt
- GOT-10k-Results/VLT_SCAR/GOT-10k_Test_000083/
- GOT-10k-Results/VLT_SCAR/GOT-10k_Test_000083/GOT-10k_Test_000083_001.txt
- GOT-10k-Results/VLT_SCAR/GOT-10k_Test_000083/GOT-10k_Test_000083_time.txt
- GOT-10k-Results/VLT_SCAR/GOT-10k_Test_000084/
- GOT-10k-Results/VLT_SCAR/GOT-10k_Test_000084/GOT-10k_Test_000084_001.txt
- GOT-10k-Results/VLT_SCAR/GOT-10k_Test_000084/GOT-10k_Test_000084_time.txt
- GOT-10k-Results/VLT_SCAR/GOT-10k_Test_000085/
- GOT-10k-Results/VLT_SCAR/GOT-10k_Test_000085/GOT-10k_Test_000085_001.txt
- GOT-10k-Results/VLT_SCAR/GOT-10k_Test_000085/GOT-10k_Test_000085_time.txt
- GOT-10k-Results/VLT_SCAR/GOT-10k_Test_000086/
- GOT-10k-Results/VLT_SCAR/GOT-10k_Test_000086/GOT-10k_Test_000086_001.txt
- GOT-10k-Results/VLT_SCAR/GOT-10k_Test_000086/GOT-10k_Test_000086_time.txt
- GOT-10k-Results/VLT_SCAR/GOT-10k_Test_000087/
- GOT-10k-Results/VLT_SCAR/GOT-10k_Test_000087/GOT-10k_Test_000087_001.txt
- GOT-10k-Results/VLT_SCAR/GOT-10k_Test_000087/GOT-10k_Test_000087_time.txt
- GOT-10k-Results/VLT_SCAR/GOT-10k_Test_000088/
- GOT-10k-Results/VLT_SCAR/GOT-10k_Test_000088/GOT-10k_Test_000088_001.txt
- GOT-10k-Results/VLT_SCAR/GOT-10k_Test_000088/GOT-10k_Test_000088_time.txt
- GOT-10k-Results/VLT_SCAR/GOT-10k_Test_000089/
- GOT-10k-Results/VLT_SCAR/GOT-10k_Test_000089/GOT-10k_Test_000089_001.txt
- GOT-10k-Results/VLT_SCAR/GOT-10k_Test_000089/GOT-10k_Test_000089_time.txt
- GOT-10k-Results/VLT_SCAR/GOT-10k_Test_000090/
- GOT-10k-Results/VLT_SCAR/GOT-10k_Test_000090/GOT-10k_Test_000090_001.txt
- GOT-10k-Results/VLT_SCAR/GOT-10k_Test_000090/GOT-10k_Test_000090_time.txt
- GOT-10k-Results/VLT_SCAR/GOT-10k_Test_000091/
- GOT-10k-Results/VLT_SCAR/GOT-10k_Test_000091/GOT-10k_Test_000091_001.txt
- GOT-10k-Results/VLT_SCAR/GOT-10k_Test_000091/GOT-10k_Test_000091_time.txt
- GOT-10k-Results/VLT_SCAR/GOT-10k_Test_000092/
- GOT-10k-Results/VLT_SCAR/GOT-10k_Test_000092/GOT-10k_Test_000092_001.txt
- GOT-10k-Results/VLT_SCAR/GOT-10k_Test_000092/GOT-10k_Test_000092_time.txt
- GOT-10k-Results/VLT_SCAR/GOT-10k_Test_000093/
- GOT-10k-Results/VLT_SCAR/GOT-10k_Test_000093/GOT-10k_Test_000093_001.txt
- GOT-10k-Results/VLT_SCAR/GOT-10k_Test_000093/GOT-10k_Test_000093_time.txt
- GOT-10k-Results/VLT_SCAR/GOT-10k_Test_000094/
- GOT-10k-Results/VLT_SCAR/GOT-10k_Test_000094/GOT-10k_Test_000094_001.txt
- GOT-10k-Results/VLT_SCAR/GOT-10k_Test_000094/GOT-10k_Test_000094_time.txt
- GOT-10k-Results/VLT_SCAR/GOT-10k_Test_000095/
- GOT-10k-Results/VLT_SCAR/GOT-10k_Test_000095/GOT-10k_Test_000095_001.txt
- GOT-10k-Results/VLT_SCAR/GOT-10k_Test_000095/GOT-10k_Test_000095_time.txt
- GOT-10k-Results/VLT_SCAR/GOT-10k_Test_000096/
- GOT-10k-Results/VLT_SCAR/GOT-10k_Test_000096/GOT-10k_Test_000096_001.txt
- GOT-10k-Results/VLT_SCAR/GOT-10k_Test_000096/GOT-10k_Test_000096_time.txt
- GOT-10k-Results/VLT_SCAR/GOT-10k_Test_000097/
- GOT-10k-Results/VLT_SCAR/GOT-10k_Test_000097/GOT-10k_Test_000097_001.txt
- GOT-10k-Results/VLT_SCAR/GOT-10k_Test_000097/GOT-10k_Test_000097_time.txt
- GOT-10k-Results/VLT_SCAR/GOT-10k_Test_000098/
- GOT-10k-Results/VLT_SCAR/GOT-10k_Test_000098/GOT-10k_Test_000098_001.txt
- GOT-10k-Results/VLT_SCAR/GOT-10k_Test_000098/GOT-10k_Test_000098_time.txt
- GOT-10k-Results/VLT_SCAR/GOT-10k_Test_000099/
- GOT-10k-Results/VLT_SCAR/GOT-10k_Test_000099/GOT-10k_Test_000099_001.txt
- GOT-10k-Results/VLT_SCAR/GOT-10k_Test_000099/GOT-10k_Test_000099_time.txt
- GOT-10k-Results/VLT_SCAR/GOT-10k_Test_000100/
[truncated: 2,854 more entries]
