# Supplementary material
Source: ML conference proceedings conference paper supplement (https://proceedings.neurips.cc/paper_files/paper/2022/hash/1c8c87c36dc1e49e63555f95fa56b153-Abstract.html)
Supplement: Supplementary file 1 [file 1c8c87c36dc1e49e63555f95fa56b153-Supplemental-Conference.zip › GOT-10k-Results/VLT_SCAR/GOT-10k_Test_000001/GOT-10k_Test_000001_001.txt]

395.5	340.5	532.0	407.0
395.5302942856784	330.4102677219169	530.9394114286432	411.4248553306737
398.1090210533681	319.1754334411097	525.7819578932638	419.08400906359367
397.5256694745956	304.9297943695288	526.9486610508088	432.7192451413317
387.7562780124632	289.63694457211767	531.3927878370314	448.2102885981118
374.0163388713896	277.2571676043086	543.4597566198661	457.55693303441734
371.2653947955373	263.85707507386957	548.9616447715707	468.60759384170285
369.2648175710232	249.41838594830276	552.962799220599	481.4727552769993
381.1208682021547	212.1040136073242	545.5312929766137	507.25971490412326
377.6375725171797	189.1409248253546	552.4978843465638	536.6092454585532
375.5561010343721	169.88851069193066	556.660827312179	557.963236636743
373.9049968734995	153.28612336092732	559.9630356339242	573.6148794291439
369.7057174077054	137.0903325978075	568.3615945655124	588.1551638926421
365.9263682946701	122.87854999387741	575.9202927915829	598.3665336315973
359.74414978150213	108.23318132181203	588.2847298179189	609.1654096637055
368.67053471629	102.65858817618005	589.2887256955559	620.3145959549695
363.62527648061683	98.6535892612809	599.3792421669021	628.3245937847678
377.1704103613537	100.74163205228433	591.621549650655	624.1485082027609
381.45209903779835	150.24307877373127	583.0581722977656	620.8669749080019
384.4331167220413	153.30099133221182	577.0961369292797	614.7511497910408
393.3753259750953	166.80766512218918	577.9786250249504	606.5047088128648
392.20293711499977	190.706556200487	580.3234027451414	596.0107835381085
391.4540552171503	203.04041313097258	581.8211665408403	589.8676056689807
390.8958452630968	234.72112511385473	582.9375864489473	581.8612304404913
390.455764172659	235.39106906657935	583.817748629823	580.5213425350421
387.8403413070304	257.8107159828712	589.0485943610801	572.354109319504
387.41659281029274	269.82785417645925	589.8960913545554	566.6091668946917
386.37129034031193	271.4178687304785	591.9866962945171	563.4291377866532
385.3144973611338	282.0658209545959	594.1002822528733	560.3273687904821
387.76590806239415	291.1518414553522	589.1974608503526	560.3333457516261
383.2888362507572	289.6330452391026	598.1516044736265	563.3709381841253
383.03580377403523	289.16634252442884	598.6576694270705	564.3043436134728
381.9209221437859	297.87400377970096	600.8874326875691	565.201385804955
381.19547747054094	297.5742713040795	602.338322034059	565.8008507561979
380.58873783743616	297.8858938876365	603.5518013002686	565.1776055890839
382.4103519767144	295.7517391160703	599.9085730217121	569.4459151322162
362.5008641583939	283.02720431445175	602.9006104931135	576.4815156528334
363.92106147197256	277.5158506163744	600.0602158659561	587.5042230489881
354.1698098829256	273.40433977572053	600.8611781833963	595.7272447302959
340.6725086859891	262.9752635674797	609.0119117657184	597.7415283352266
342.31282290738295	259.3394030620886	605.7312833229307	605.0132493460088
344.280839562775	254.5639068883521	601.7952500121467	614.5642416934818
346.09077034329374	251.4511327096693	598.1753884511091	620.7897900508474
349.1673071644557	248.37121142483124	592.0223148087853	626.9496326205235
351.46360886539634	246.5976779698716	587.429711406904	630.4966995304428
353.8829568790594	246.3111906097442	582.5910153795778	631.0696742506976
354.65739914956316	245.34435773532243	581.0421308385703	633.0033399995411
353.7605918687556	245.26594538919096	582.8357454001854	633.1601646918041
354.1093608475891	246.3254925163949	582.1382074425185	631.0410704373962
354.553097196439	246.80980273228238	581.2507347448186	630.0724500056212
354.13993767144416	246.6238114265683	582.0770537948083	630.4444326170494
353.9496678203031	246.29650102741596	582.4575934970904	631.0990534153541
354.6022172288789	245.74077341175098	581.1524946799389	632.210508646684
353.8539380358609	247.66380456349657	582.6490530659748	628.3644463431929
353.0996824876352	257.8967850378914	584.1575641624262	626.9661666921891
353.6762448222047	258.7695014904249	583.0044394932872	625.2207337871221
352.13495359455726	260.2096888856168	586.0870219485821	622.3403589967382
351.30232230915624	270.15776693010713	587.7522845193841	621.4724142675908
350.7128392364885	271.4788545887659	588.9312506647196	618.8302389502733
349.25796486694935	282.0380036593805	591.8409994037979	616.7303497027551
347.7468677693521	281.72494604359554	594.8631935989924	617.356464934325
359.0569933477834	292.5790562510533	591.332194187597	614.7374962648767
358.6006672253223	294.0136819341683	592.2448464325192	611.8682448986467
359.1386835983858	295.9117822791496	591.1688136863922	608.0720442086841
356.96534378670793	296.53271930761474	595.515493309748	606.8301701517538
356.6928994895279	309.99795872677385	596.060381904108	598.834059089633
355.80604104983775	314.08379386627047	597.8340987834883	590.6623888106398
352.2315886450614	314.6304228947786	604.9830035930411	589.5691307536235
362.284779433537	330.8068656131438	603.6880751267013	576.0276984275044
358.5394512203993	332.1226359438559	611.1787315529766	573.3961577660803
353.5010767780182	336.49560757633515	621.2554804377388	564.6502145011218
348.2386788381703	350.26802501145687	631.7802763174346	555.7757404782778
346.38061435700695	357.15503198707347	635.4964052797613	542.0017265270446
344.4841452363903	362.5938695346862	639.2893435209946	531.1240514318192
353.2212052118099	368.230925666391	640.227242429052	519.8499391684096
352.8842103327644	373.6931828658127	640.901232187143	508.9254247695663
359.0940168336	378.22004406469193	646.559282035842	499.87170237180777
357.73574340974835	382.2034140069127	649.2758288835453	491.90496248736616
366.0767165816037	385.4013268542135	650.5224627614996	485.50913679276454
375.86848157651644	389.755973081054	648.7819489766829	476.7998443390837
375.17287663429215	392.7436079405227	650.1731588611315	470.8245746201463
375.1213408244887	395.9661402069318	650.2762304807384	464.37951008732796
375.61219164570775	390.6722027730129	649.2945288383003	457.47488709151446
374.65714521900634	395.5647783304222	651.2046216917031	447.68973597669583
375.9357069530315	397.36492035741975	648.6474982236527	444.08945192270073
377.20081180757165	400.56818413611256	646.1172885145725	437.68292436531505
378.2761929226808	403.542320197888	643.9665262843541	431.73465224176425
384.73584210252335	404.6595006537881	647.9047761400894	429.5002913299641
384.5754654775101	405.8407653634573	648.225529390116	427.13776191062567
384.6289388591333	407.7502669284506	648.1185826268695	423.318758780639
386.29689499654	407.96897041808836	644.7826703520561	422.8813518013635
388.17671604513896	401.80909210171296	641.0230282548582	418.4785347592902
390.46729081914526	403.8150034255259	636.4418787068456	414.46671211166426
389.0887804324417	407.6474191433293	639.1988994802527	406.8018806760575
390.1742066157599	412.5613023293192	637.0280471136164	396.9741143040777
390.6504788861163	412.9718423280991	636.0755025729036	396.15303430651784
390.792710438701	412.60388321151845	635.7910394677341	396.8889525396792
387.84656216341665	412.72514499347795	641.6833360183028	396.64642897576016
393.9555604430551	411.8497687577929	645.7027583981171	398.39718144713027
389.35354553524706	434.99633709348655	654.9067882137332	384.757650509639
