# Supplementary material
Source: ML conference proceedings conference paper supplement (https://proceedings.neurips.cc/paper_files/paper/2022/hash/1c8c87c36dc1e49e63555f95fa56b153-Abstract.html)
Supplement: Supplementary file 1 [file 1c8c87c36dc1e49e63555f95fa56b153-Supplemental-Conference.zip › GOT-10k-Results/VLT_SCAR/GOT-10k_Test_000002/GOT-10k_Test_000002_001.txt]

10.5	845.5	404.0	75.0
46.11375103326182	839.497080992143	395.5332431993943	78.92131076394547
106.67930897921991	835.0055792579299	387.09892292346	80.86076450637282
147.8778584233193	827.2921646484356	374.33961515157546	75.39625639046699
200.66252998532525	803.8695082557604	368.968016278439	75.4826218587423
217.82359521323212	800.5015294023075	367.6795122643125	75.61185427731054
263.5060903010394	796.9763206583403	355.4099651518584	76.07098484331487
290.9540020838335	796.6873230245432	351.9472404156287	76.6489801109091
329.3773146491805	800.9529015181802	351.8044107899242	74.50980608238424
354.339501929731	810.9493241055496	346.32051267354973	73.56287938395673
386.9239817682512	814.5467911503574	343.68985548567474	72.6217755432576
406.35902495759973	814.0907728185018	342.0133135106099	73.53381220696872
437.7077151117118	818.0069201783173	335.054593711994	71.8947019884056
445.6073368150748	817.1370845271313	337.44858717931663	73.63437329077756
458.62657304912733	816.4414676148684	335.93579908958	75.02560711530329
460.8851178872683	816.3403001015691	331.4187094132981	75.22794214190195
477.44152235983177	819.376227326255	334.7730868930135	75.23395209667036
492.0593427084957	818.3216800090512	336.1617631736612	77.3430467310781
517.2265759515183	821.9131490810518	329.12073145822285	76.34488498287806
533.9573604163169	826.3940968201272	325.9949217273911	73.45014134448024
561.4875343967597	824.6809309872637	324.6456194833371	76.8764730102072
580.0537426413448	827.5022384222809	323.60133410039265	77.248546657877
595.5486046518479	823.9515721427812	322.64746635974814	78.34270796080423
608.7343817215517	823.9471095854923	320.33460962803395	78.35163307538203
629.5441252661361	824.8652538312906	326.57451191427685	76.51534458378542
633.0589484947963	824.8496336113086	325.57965076142756	76.54658502374937
644.7794052070876	825.4721762507174	320.2031111929392	75.30149974493185
659.5472626295107	832.5440969106361	314.3569333185058	73.00242691030074
691.271511928471	834.9344715375305	314.6706511258835	74.01824278426619
707.0165901756682	837.8971573754496	318.10288199427316	73.91326900222526
735.8013159450002	842.4112145869169	319.19765294707724	70.75157682843758
756.930537124148	841.9916973498862	317.68622763202836	71.59061130249898
773.4429360150777	845.3647422309563	325.37363675831915	70.66055109866603
779.0185834499694	845.4131037244742	326.0332978547454	70.56382811163002
783.5215151424459	827.9436676096738	328.8530681771525	70.02579921915093
778.4701421576538	824.8894197368693	327.07230065932265	70.19253822105297
790.0720432560186	803.2521650584827	327.5490600365575	72.02606482338857
794.3220150041759	802.3445450862376	325.0113071250197	73.84130476787858
792.8161506805976	799.8107683843571	328.0230357721761	72.94719725969523
792.2996729747761	797.3936771804343	329.0559911838193	71.79482381327873
795.0952411661581	792.1179062433331	329.44362454071586	70.38882620815977
801.5475341616657	788.966067622729	328.4530729752515	70.7354862365925
814.814615824825	786.0013633287971	325.7185083892529	70.7149951393765
831.2499294645252	779.3128720404223	322.4045937284651	72.26929266868098
844.9715401325952	774.5756756567624	324.4364500988881	75.8486698946881
844.8051240790677	773.5334663512056	324.7692822059433	77.93308850580172
857.4392966429234	774.3158790208048	323.6473212289676	76.36826316660344
863.2437614948235	774.7894165578575	324.02038701338813	75.42118809249789
879.5004293844715	774.2070703039627	321.39754323681257	76.58588060028757
892.3814775383094	771.5019582739645	319.49006004147225	76.03245138219992
904.0657730734766	768.5035159234333	319.82695145704355	76.10296546178589
911.641311012209	761.5930562333347	322.47318146310386	78.05901425296653
914.1111393520794	736.9625744762195	317.5335247833633	79.2653712567935
911.2900340067565	710.462876051292	317.2152265110813	78.6201874402996
888.6479356309337	687.4591544153441	320.89291226358364	77.07733242746019
887.0102001868418	684.2107794844266	324.16838315176744	77.6081175578519
883.2617963247076	674.692800068152	319.6212361862058	72.5561670107409
876.6169519765585	674.1664188120857	321.1876676253104	73.60892952287344
858.7587133800648	657.4835783255469	321.4817155212039	71.55218119885697
859.2693058347425	651.3477330294653	320.46053061184864	72.0872261531261
843.0490173305159	630.1699379246772	335.3080629373927	73.39237876924815
811.9467690483987	630.007355995163	367.0282086735681	79.8144127938883
895.4399308310265	648.772981508585	393.2858061225637	88.92824614979479
710.4161101131358	640.408842812994	374.2172163775964	105.65652354097689
636.9844138237659	657.7904615924255	339.7013295570217	128.9346553898945
599.1046346368471	661.1001867217643	329.16796677687717	122.31520513121677
590.247612116056	653.8407737457683	284.5939323144418	136.83403108320897
577.2373633941745	606.9022323076222	251.8094882192397	139.2367604544442
433.78341831869477	675.8126693871984	240.10738334250124	135.485679981197
418.08613361141033	651.0146017249576	230.50152865829426	132.36698432153844
424.41031797847484	624.582191786013	217.85315992416537	134.27398038200127
429.15959070965573	609.9851917927133	208.35461446180358	124.92514217653705
441.6421968513806	615.3992245432208	204.21830629540207	124.51152873404621
448.9307562305773	620.1244665041552	205.05717604682954	115.06104481217737
446.045624272508	631.1872004341985	200.8450834317584	112.90029001451003
448.00339112863054	629.5462905385112	201.8216545437855	116.18210980588479
550.2203431361318	558.9261877108244	151.21985498363256	128.40184075719122
457.57653521539106	650.2734726118406	160.51449694829887	117.30042048505325
569.411975829818	588.0441563021614	120.0386203719722	141.43797912802796
462.15561444663854	715.938280984738	141.17958274005656	124.27871067989452
