# Supplementary material
Source: ML conference proceedings conference paper supplement (https://proceedings.neurips.cc/paper_files/paper/2022/hash/1c8c87c36dc1e49e63555f95fa56b153-Abstract.html)
Supplement: Supplementary file 1 [file 1c8c87c36dc1e49e63555f95fa56b153-Supplemental-Conference.zip › GOT-10k-Results/VLT_SCAR/GOT-10k_Test_000003/GOT-10k_Test_000003_001.txt]

1419.5	670.5	406.0	58.0
1420.9114455873535	669.680113477729	395.4032582386544	58.63977304454204
1423.5951397452757	670.6336029513666	383.395452118299	56.732794097266854
1432.1754338178469	670.8299649371918	372.6710856031079	56.34007012561631
1435.9993220710649	670.7525340342679	365.0233090966717	56.49493193146429
1442.7754977906102	670.5356652484605	357.64852699021844	56.92866950307902
1450.0463197686415	670.8485520550842	349.19113135822306	56.30289588983173
1453.7445653133966	671.0534397883243	341.7946402687129	55.89312042335132
1461.7100659337207	671.0346466650906	331.7078486281339	55.93070666981886
1465.7946045762342	667.9177902653024	323.5387713431067	56.459144523879175
1471.425155909306	665.9791642041246	312.277668676963	54.733869066429406
1473.2475021631578	665.8377011802764	308.6329761692594	55.01679511412573
1474.2203147729615	666.1639923513555	301.320046973721	54.36421277196739
1477.2288762134142	664.3085990171157	290.04995823066946	52.82203357830033
1477.137857144338	664.4653346090365	285.16582916394526	52.508562394458636
1473.983199004286	664.2206918566584	281.49076213836423	52.99784789921503
1471.4638526910674	664.0476172346212	276.62794324674934	53.34399714328937
1474.2304193695195	664.1104131961514	266.2048609591227	53.21840522022897
1474.9417848648698	664.6996898772554	255.29713803370612	52.03985185802093
1472.9477648113311	664.6033283908514	245.5821391517676	52.23257483082908
1471.9892755756007	667.0395364847564	238.62708476362815	51.796175072819196
1464.1287829488856	669.4252307610473	232.69535383385016	51.355329756879044
1465.9428414298309	670.3070063359321	224.82801012597378	53.83100535309522
1459.9402628119205	672.6013441199801	215.9498208672203	53.41899908391407
1461.447269808814	674.888911176854	208.89142864380398	52.88824319979595
1462.8732702363545	674.7785302697077	202.10417312008235	53.1090050140883
1460.6130579635965	674.926934244277	195.09240456093124	52.81219706494968
1461.2912812840957	676.60260148869	189.99614767012434	53.20067282593233
1460.1914450002828	676.6710618793371	181.1699713385492	53.06375204463808
1459.884685027009	674.7066548366053	174.6872503127746	53.4444456439408
1461.143156250211	672.6433033635834	168.70684647228205	54.10768719589524
1456.2154695759502	669.8363088586484	164.99870081209764	56.330796453588874
1456.6991063972819	669.4524271402297	160.65258184931295	57.09855989042627
1457.7710938409957	668.2982246629161	155.17780705758585	56.07616494075439
1458.7543622555686	668.4629365638531	149.9772457683329	55.74674113888047
1457.4174978405763	667.6661083726996	146.343695370508	57.340397521187526
1457.7756015181217	667.3346221174936	142.49735875218187	58.00337003159929
1456.637789946256	666.58886304548	138.59977494509508	59.49488817562646
1460.349391464367	666.9536975972974	131.17657190887275	58.765219071991794
1462.2614972176016	666.5281039619936	127.35236040240333	59.616406342599504
1464.3405607445343	667.0696336166362	123.19423334853826	58.53334703331411
1466.011560251632	666.6251626622379	119.85223433434233	59.422288942110654
1467.7426002668105	666.6766869259161	116.39015430398541	59.3192404147543
1472.0119362294045	665.2545018099052	113.31216938455798	59.433267143896245
1475.709283306908	665.3664281654628	108.60459206572456	59.20941443278085
1478.1656890049205	663.4930978421606	106.3057437522186	60.34211199686639
1482.5017100829668	660.1688694554766	105.43160293839833	61.79196787538612
1483.7481096491977	658.4023810618127	102.93880380593649	62.71401705989925
1484.6532117238933	657.3996507488358	101.12859965654506	62.13007082595778
1485.4030354087452	657.4199833247412	99.62895228684127	62.089405674146974
1486.1596305572984	655.7887048060962	98.11576198973472	62.82242866755284
1484.759891778924	655.3479095277137	100.91523954648389	63.70401922431792
1485.6302985732227	653.2054446632303	99.17442595788617	62.837312508962626
1485.9018456307654	651.2900843093145	98.63133184280102	64.1327612041273
1487.065899798283	650.5004026233571	96.30322350776564	63.16334510272333
1491.4959042217783	647.7855305512614	99.93166766193346	61.10001744621971
1495.643648462504	646.3815126090918	101.7059053354661	61.39062179181296
1500.3505235720268	643.2441863891142	102.48718242101438	62.567760579471134
1505.9282918123306	636.9596487242544	104.23272134513132	62.2357605044666
1511.6855194061384	636.3020821853003	105.72132032293342	63.55089358237473
1518.6921761204449	635.604053401215	107.57766213836832	59.657066069195864
1526.1503372070604	634.4620652696199	108.30002255863303	61.941042332386104
1534.310912911363	633.8666426172067	107.91483895773537	63.131887637212515
1535.8470085440651	632.8663091047083	110.18358550435116	62.46208575619934
1543.9461963792105	633.4075312517068	110.14163815192042	61.379641462202244
1547.29675858579	632.7535131988922	106.11420839873429	62.68767756783147
1546.8123294294546	631.2668732414763	109.71928016640788	63.024744027660404
1547.4481511161148	631.3073287654586	111.14305410154387	62.94383297969572
1547.3617922311028	631.6548430306965	111.3157718715679	62.248804449219996
1513.867699513543	622.2896627009602	107.95167732061425	59.33230972836232
1486.4610362283781	621.6559247473213	102.81714390236189	57.99335694048466
1468.254495466434	618.4112061671817	99.1064866349112	54.451859402928825
1452.53924758133	617.4191790985379	94.64883645087599	54.043370476600415
1451.264453336018	617.2177140333487	94.87874624014849	54.44630060697888
1448.7052716408582	617.654131343705	95.3372595054399	53.57346598626626
1438.9536524935663	617.3119706839676	96.26546643909028	54.257787305741026
1430.7323229442661	618.1841021427844	96.27734804205589	54.860778316055224
1472.462601981836	624.1116407188939	104.76633791269	61.86714689630247
1504.890600725311	633.1932366548704	112.77524218127812	67.12481630291543
1509.7544317220597	639.577183790983	117.09846084257416	74.02815494740148
