# Supplementary material
Source: ML conference proceedings conference paper supplement (https://proceedings.neurips.cc/paper_files/paper/2022/hash/1c8c87c36dc1e49e63555f95fa56b153-Abstract.html)
Supplement: Supplementary file 1 [file 1c8c87c36dc1e49e63555f95fa56b153-Supplemental-Conference.zip › GOT-10k-Results/VLT_SCAR/GOT-10k_Test_000004/GOT-10k_Test_000004_001.txt]

403.5	401.5	215.0	79.0
416.5825351673987	400.5090801869668	210.3568171187627	79.98183962606646
432.5087263574278	400.8934617204625	209.6931287109731	79.21307655907503
426.4988436923134	401.60510871731594	208.41634311740304	77.78978256536809
407.3236346229574	381.73917426235096	211.66072966546622	78.02736593581818
401.5858402423874	366.3054713484973	214.25829817397664	77.8217008793223
393.96169477972046	369.1186636377289	220.56165233688375	76.66778468207244
386.02947045513986	372.87948010841876	222.80136143606398	78.22931144068008
366.7639648320695	382.9962777372848	233.72076439745678	76.4034550394465
350.69463141699293	385.15767412605254	237.51457339467953	76.80480523406604
332.8738349338996	401.8064899966155	239.65818043560785	77.00515941819852
325.68103970659286	401.7464352065921	244.40465464623918	77.1252689982454
326.89238562170533	420.9163428637124	237.09281673350478	73.0094762615702
324.97200549211436	421.1235682578927	236.2240835717178	72.59502547320947
325.38982673618915	425.9338797720143	235.3884410835683	72.35344268802757
328.9647386624879	428.6899709801565	242.25825465615975	71.51447274680616
366.3757517759987	428.1198000079159	243.5144306584954	72.65481469128738
380.5157252807925	425.2709679557985	243.99752329859007	73.55863885390855
400.2963703563481	421.0916720133109	242.97579452500446	77.09978556669293
418.6789903563846	420.49344363635623	240.28935855800705	78.29624232060237
441.2856766821009	453.88114746346827	238.7461709935004	84.3044764779219
453.69512064933326	488.62555253922244	238.6269373469991	88.91462919030366
439.7164516669253	498.82536430308744	241.4761596582248	88.60149818544573
441.03697533035285	494.53366761388503	243.89188824315136	92.12811565206891
444.12053763076966	490.169786417292	242.87972202915137	95.70091965842124
448.11432438079794	485.8921306478814	250.50569284502313	99.05171642526638
497.5214856127941	479.4919519073481	237.67718883449953	106.47796025299124
522.0247721200153	476.7221598966983	236.55420385270787	112.0175442742908
565.2252166009109	469.4471920980977	236.56966620155174	121.1664579145773
571.6525548229425	458.30993732443153	240.3946081028999	121.20147633469486
604.9432158612403	473.1239337862345	235.59535917323493	130.88934814095413
625.5694125256041	488.2932328825002	222.90407389771616	140.536301222915
608.974142698349	490.6313418231052	216.288377872196	135.860083341705
600.7359814538281	484.6705639228459	205.2178683029921	142.27227273057454
640.6318949880957	440.7846062806144	190.82357178274427	131.9478921926064
699.6372185773024	452.349931325134	168.9877068382275	144.25005661079223
743.9840387474387	436.87071267336296	154.2295304761442	145.63430832305863
763.9582097154731	419.4786022819377	142.61186956102918	147.36606791479642
819.6671318277697	422.0502648356207	113.38973391616054	165.05488407957614
841.70595709952	419.42144181099246	108.6064696707262	174.67857305084001
856.6366185467127	414.1598480676215	105.32960229894351	180.7710179504814
852.2316008662738	413.89815738739003	105.20725684739409	176.8282089047308
831.8661371156649	403.6347894021822	101.8826296165519	184.1382784555284
826.1366932206424	385.6109819569177	99.96914661342058	184.52623789758786
831.3132659531614	370.82837827442637	107.33797668539034	183.07798807280733
833.0800821416453	364.72680992604586	112.87320318821298	190.7466953296731
823.9460425180995	336.87190333315175	126.39934715821612	180.0694146362227
819.7482783757312	327.80683014342253	134.7948754429529	174.1608495314195
795.8929753596983	309.0370762016189	148.51655657113457	168.00031111003312
787.3829328917027	295.1606691337292	160.5544854040373	160.87803252419306
781.3867503490262	280.8478129328963	172.54685048939024	154.07024350016715
780.9514232215798	278.4969474806428	173.41750474428295	148.48893768015859
768.5827506089817	261.7570173428284	182.95807632687155	141.44406824216696
758.907690811712	248.61038674246603	192.11174266873417	132.04974305852323
738.2103933798469	229.64851086155943	203.0086284878547	129.30988276085702
729.3171938518652	225.6029455936813	210.39284934328515	126.9988350960802
705.5231511639173	220.96436902217624	221.07327711909625	120.45842069619687
697.685866427471	202.60188941053602	226.1082796283442	119.94489554672049
705.3113139667394	177.39202815388813	237.78319523240873	121.89815883133349
709.7387917005058	169.16749420290176	245.6991174920166	121.57634900616566
724.9657035276273	174.2226712702681	249.44945090584542	111.46599487143297
723.1194474657766	176.36626705780844	253.14196302954673	107.1788032963523
701.5397755506566	199.7306926741224	257.40420323041843	99.34705569309274
684.5482220527302	201.55452127772628	258.51601879395207	95.69939848588496
652.3648332085634	217.16959806281722	263.1651665169273	91.61362217268422
631.1332285756995	216.03223331639322	262.2578499585593	88.46703593752032
585.9059290649275	202.3436646530094	267.0961119132702	83.73804686422548
565.6774677989154	201.03770076585175	264.8892600244575	81.01700283593617
512.0411467044416	191.54855911309502	267.1335629726922	73.7382013312714
488.91788848259773	191.40562084474038	267.05223841970457	74.0240778679807
459.15299470258583	185.41946626494627	264.7610139755189	70.54113402651657
