# Supplementary material
Source: ML conference proceedings conference paper supplement (https://proceedings.neurips.cc/paper_files/paper/2022/hash/1c8c87c36dc1e49e63555f95fa56b153-Abstract.html)
Supplement: Supplementary file 1 [file 1c8c87c36dc1e49e63555f95fa56b153-Supplemental-Conference.zip › GOT-10k-Results/VLT_SCAR/GOT-10k_Test_000005/GOT-10k_Test_000005_001.txt]

842.5	464.5	396.0	171.0
844.2674929585233	462.8333230379797	373.96179435841697	164.58174406177238
845.0767360268528	462.37026229693186	372.343308221758	165.5078655438681
848.6994648407657	457.5337760831047	365.09785059393215	158.55674390673636
854.0811624369001	455.9294915991038	354.3344554016634	153.68073719911604
862.0572697945988	455.01009564998657	354.0675949270445	155.51952909735053
895.9676395689721	454.44910925728783	341.34552791186707	156.641501882748
890.3451450859063	450.7698720245953	337.17795819588946	156.29369700707838
902.0057855323982	450.03770733282795	336.77539551524063	157.7580263906132
892.345317796509	448.2224759434456	340.7777292857283	161.3884891693778
898.6171037801275	448.97016287758134	336.01511587364246	159.8931153011064
931.4577879972184	448.31257517708707	324.13198599585417	161.20829070209493
965.3297645648788	446.67866240082924	301.59637581562026	164.47611625461056
993.4829154632355	450.9246233904804	288.84934193671273	155.98419427530828
1003.4225072357335	452.01995374010147	275.8968506614991	153.7935335760661
1031.3909079132097	446.721575494135	260.1488120692734	157.69216294087795
1017.3478678249242	452.49137274436066	275.1738300214619	152.68309955261793
1022.5848272565847	456.08723064039805	278.0369433885638	152.15989987575475
1016.1017612380124	462.5780924827326	284.3012181976455	152.5818906472114
979.4031510425305	440.37343051988194	289.68419546400844	149.38124438569213
1000.8425907053974	440.7726571090633	280.93326892370965	148.5827912073293
997.2671972182785	422.22746062478325	294.767326091722	145.57356301324282
1024.7854548960893	421.74069182793005	294.4049866233695	146.54710060694924
1034.6432041997896	422.3637269812617	288.3811586045133	145.30103030028584
1026.6713845719557	419.95474379913895	297.58872101399896	150.11899666453147
1004.273337253612	416.48109726431073	314.56786294224855	157.06628973418788
993.7050259122097	426.13654789915097	328.3814462988126	174.3705850957103
984.2374122282505	450.0088395225723	339.4927421056393	181.39352277651057
979.5533617788589	473.9963976308926	356.9687650067101	190.17386057588266
977.4972812148046	492.0445871016508	361.08092613481847	196.65617484575142
973.6454243149491	491.38698753123043	377.47195696086305	206.65869101292571
975.9296135402574	516.7808276438499	391.10367930299196	219.571363562296
978.5126204261971	513.0492902498472	404.9808888412104	227.03443835030146
975.8851095118514	510.89128122089033	410.2359106699017	231.3504564082151
973.8085137413573	502.40903417818885	424.3941609472695	238.30989175723846
976.6528398456898	494.3603989894217	439.37133846384745	244.07424727215124
972.3069297114239	461.2976070895489	448.0631587323793	256.93733036962806
957.4568672776842	457.4145829107211	466.7633831492046	264.7033787272836
909.0288630171375	449.38630772647315	483.7580952762653	269.35117246806055
861.479597903278	445.42376768928136	496.6821230130652	277.2762525424441
819.7217750922132	393.08218899698977	507.8061969784325	297.5025763274716
803.8255890854766	384.33126979844036	514.4516634298835	302.4309619435593
786.6702271181766	367.0635552953434	510.49586568082384	311.4553764939802
788.7709217598988	367.14939178411225	506.29447639737975	311.2837035164425
790.83695976764	368.4193970184143	502.16240038189716	308.7436930478384
785.4693535144704	369.4742221461409	500.21857949259004	306.63404279238523
788.8502365901151	368.06795953020844	493.4568133413006	309.44656802425015
791.1344056073603	383.1472571994612	488.88847530681005	304.4096893515383
792.8212572033814	383.8355009821289	485.51477211476794	303.0332017862029
804.0366281357567	382.3285069414198	475.4187006875335	306.0471898676211
813.5308188663148	385.45649240826214	468.6643937748355	299.7912189339364
821.2547528161385	350.10912334813906	465.24491409778557	310.34401594119333
849.0720501576841	304.5137052726831	458.22210732498854	304.3112762715175
851.6807542141448	278.20836170581765	453.00469921206695	309.13360135827907
885.6083753369378	274.1816101965215	444.8924360320375	317.1871043768714
890.9593942601567	274.18740699644627	434.19039818559963	317.1755107770218
895.3663815243563	274.0551705353882	425.37642365720046	317.439983699138
900.5288553919818	274.1297350501264	415.0514759219496	317.2908546696616
904.4288884330933	273.7013824825027	407.25140983972653	318.14755980490895
904.6252663337652	277.9994108489392	406.8586540383827	320.95354324980457
907.8535103871603	293.5706820772705	400.40216593159244	312.69426529832333
909.7605812138845	298.9305943926594	396.5880242781442	313.18304996495226
908.6871323422465	308.3487990724666	387.57673456337886	305.5048280633791
909.5071217313566	348.71678218874257	385.93675578515865	301.03751818059584
911.66091967741	354.3885723269693	381.629159893052	311.2895754782869
912.9345737578518	383.00052249648263	379.08185173216833	308.5558814844592
913.2684005506055	400.6529395088757	378.41419814666085	305.6951248491854
911.3429661091506	434.39795207068784	382.26506702957096	302.75398869094704
