# Supplementary material
Source: ML conference proceedings conference paper supplement (https://proceedings.neurips.cc/paper_files/paper/2022/hash/1c8c87c36dc1e49e63555f95fa56b153-Abstract.html)
Supplement: Supplementary file 1 [file 1c8c87c36dc1e49e63555f95fa56b153-Supplemental-Conference.zip › GOT-10k-Results/VLT_SCAR/GOT-10k_Test_000006/GOT-10k_Test_000006_001.txt]

948.5	361.5	217.0	371.0
917.6749587258535	366.6350737075022	231.74956824055963	359.72985258499557
886.7708674473105	370.8087029993138	228.7379938699974	351.3825940013723
878.3196684435912	374.08671609230515	218.38667163587516	353.9111412292433
852.0229592083331	418.98080873998043	235.18342868011445	335.7162787864469
1005.3928380617309	477.53408517381274	268.75759571742884	290.254762707016
709.4643764053453	538.2140588729536	314.9080811304078	248.1102659716073
501.50722944132673	301.8642447749586	323.68481956806284	242.86580728758366
686.277875954589	524.4237667582987	319.0161987373848	233.81410326228132
708.1505525709432	538.1865299824146	336.0315556160176	223.64877970300404
724.4940675659456	533.7136527633755	329.6525134635267	223.82520486191106
694.8698691086033	534.1112940496291	319.49082116894886	223.0299222894039
783.1125012667158	497.31724594056305	279.16244036984006	237.0493819687978
662.4981103922056	505.9006031204847	276.7145966568326	228.00522179102228
689.3991594612872	514.8856417874597	270.5470061062083	217.97422905499536
713.9193100617487	524.6868190927987	259.9172177008936	213.73607956256035
813.0318576335364	487.3372488577222	225.59736463938623	228.8333138210524
814.1188455654749	465.058556972103	194.79801566697105	266.2343543151562
849.3738209090884	451.9929999446361	189.43483669090165	285.1269381799615
877.4155420693498	456.74981052554733	185.3987267258141	297.9193165990398
893.173021926901	458.7363539214573	184.1220287670704	316.62492612448864
878.3019417265128	469.5205842368115	213.86418916784666	310.689375686379
891.0689563093899	514.8221778128093	245.90816026124705	285.8896174019887
875.3729298795971	595.5817032175361	268.9313641345166	241.53445240096116
830.5004304422023	610.0207860882016	286.35293235015456	212.65628665963004
830.3081215522491	626.4959256279501	286.7375501300609	187.54296607641078
826.671048339751	658.5122952364036	286.58366348518143	175.50645834863428
809.0156766889795	661.5538744419978	300.2216325124625	169.42329993744588
733.4585476126631	658.2548501163271	297.53349554677425	168.69742501172402
783.9521235203406	657.465657876837	283.80793081551803	170.27580949070438
874.8382505853942	646.4403854521797	236.8373971703449	178.1366995521313
899.1202258335164	646.9985295031885	214.34808273713617	177.02041145011358
1080.0738772235695	669.7476972314608	234.1295876235481	156.14716035915077
1100.4013844440371	709.8397625519294	248.5126380006114	124.88575400087879
1001.5655236972862	665.4611645343186	231.61555426140592	144.05306725792508
834.6211561570361	653.0761421237847	212.96061820310368	157.0716563743661
849.3980213507082	708.7463980858113	229.892002233502	127.08009468136194
825.6679478349213	704.3842483292744	232.8480440302633	119.11535473138113
664.0909227485325	676.8419916028447	222.33775842755637	130.44061103335724
635.587236339281	661.6990004675644	207.73801501700936	133.18539475428338
746.7450141063703	639.9725930277033	193.5531148625698	155.29147574890408
758.6275881901073	670.426399750859	197.21470870599777	138.26664952003577
849.5048584948036	666.6682107388815	183.86791152483616	140.52028556185851
876.3343727110084	660.0030876191568	170.98536503861988	148.75347155803388
890.4488357187108	690.7731351281127	177.9819328674177	127.47108379063937
1039.4695946997458	716.1619970511001	177.15683832469045	115.04386619232156
1087.1135300816836	700.0475054889063	150.50178674874223	119.819721641538
1157.7282064811384	743.1809231774841	175.02909612314505	97.30544863873311
1151.3815463353305	742.9376219970097	191.96725917310283	93.54720824133992
1100.7003270705006	690.8819456246295	151.60160526733517	113.50750610256543
1088.381738538639	686.0015650552135	138.76136526080379	114.93995233689628
1140.087681500856	636.4532068074748	107.18551575527448	150.1824142377917
1133.8495046348096	595.3176022449128	91.38975641103514	179.94827050687027
1010.8730337399354	529.335614050636	97.04441954094956	172.7921908292044
956.4915046617783	619.0752629966773	88.0022502927929	191.05738179462628
933.7470754406252	607.6810047495889	98.9385206507568	179.29331020446088
840.7251932292471	473.2047006945178	102.88371907217234	183.76942959837035
745.2700119968177	570.57719287431	97.15507415083268	199.0706576740435
725.2256413762495	568.6626170588913	100.48036991761808	202.8998093048807
725.300637690869	554.4413531287131	105.03946261293603	212.50599586701057
884.8556092999555	416.7359515774117	135.8602524921653	187.2720846183241
910.1347045269512	447.32452723555514	130.95519729187816	161.60292738825166
877.2884422389012	517.7793013065365	127.63436935366116	163.32097444254427
859.2494917525994	520.4540543714663	127.12547425271316	167.11816733107224
859.8874339659305	494.35057501999324	130.4726354126768	149.97944223463372
699.8743970827566	459.94786084709256	141.52595482175875	152.57642321816385
616.2654788799964	493.8398158769787	114.25371472751655	191.29898362254715
631.4034802255761	570.8059387042131	117.39191943233008	185.34394215024446
627.8705809098775	601.2619688214386	124.45771806372733	162.3308750468343
624.8745382956829	611.2864829045159	134.95630284211663	146.7883464306799
650.9160092213701	520.7377888164806	140.5406507325078	146.01197465195077
686.1173079134165	498.24814984938723	119.77482867735958	168.42908198207186
780.3115957494532	599.8946124737312	130.37390117823747	146.03401870879412
753.1114181892267	565.7922223330409	110.80498257480755	175.07859525400133
769.5963609919759	566.2575863998889	118.09720647577703	174.14786712030536
797.6816399177579	571.1175757283041	126.06168527603336	169.00896251003329
888.9104252423206	566.2280296741909	133.61699600135995	174.1535940969318
911.0771777534138	581.9377186504504	166.6636429938879	152.4067351462523
836.7632398429399	615.0873223977704	184.68113763102377	126.29533724663102
775.8949872629629	619.966806799768	194.27790044130253	116.53636844263586
727.1470527338915	627.5121849358695	204.36064442485258	101.44561217043294
730.6542942328642	449.71073194168935	187.85180446249865	124.74602440449394
789.8080719999359	566.6252027335663	182.1903944091078	116.20937378224465
693.8225935445698	560.3288010011746	192.01570396854333	119.46137481875643
880.6450556383949	500.6126730094396	159.39457305561254	160.94533519657622
821.6265137178835	476.3426786394572	131.13511948578133	194.3511993767977
717.3192505802613	444.94031494082856	115.28177353844544	216.34358636994938
554.3295938731014	389.89072684940413	152.21910104183314	176.76030556320868
432.8660136236375	495.54372454561343	162.1734759222275	167.36405770685258
420.30783965612034	513.1680277643172	161.3427912751488	168.44129688440296
302.9237081267803	364.8698825898383	193.57822678155566	143.06232291949067
303.83032675163975	412.18338321961124	186.4785065805271	138.30553183220877
315.1890584386996	515.4136565127275	158.66041861811522	166.47371630741344
309.8388168404221	485.2776300484649	143.76163693979746	196.0266513860912
198.93188038922278	482.25768825445886	173.51018306615651	159.3853512460945
29.754870881349404	556.4850731054123	186.9054953665584	157.6861265124079
52.07371645639094	572.864618454539	180.22012625312294	157.45759755985236
8.234870862013963	575.060864609488	193.49148405152624	147.75036715064357
38.192829343516024	597.7537998658975	203.27902409323525	134.53532294769224
99.25188347807051	590.5794131831602	192.29925500390448	143.59179444746306
