# Supplementary material
Source: ML conference proceedings conference paper supplement (https://proceedings.neurips.cc/paper_files/paper/2022/hash/1c8c87c36dc1e49e63555f95fa56b153-Abstract.html)
Supplement: Supplementary file 1 [file 1c8c87c36dc1e49e63555f95fa56b153-Supplemental-Conference.zip › GOT-10k-Results/VLT_SCAR/GOT-10k_Test_000007/GOT-10k_Test_000007_001.txt]

601.5	207.5	272.0	283.0
569.1457097532219	205.01690595831383	265.7907540899493	278.22645978292144
549.3145660013012	200.23759111817256	245.48655727347045	279.2184488460153
556.3375204121298	199.95586129546678	223.18184735971442	279.78190849142686
542.9713957949818	201.68279707794954	226.18967365128736	276.3280369264613
553.3421579063122	201.98246077089186	229.15958277776247	275.7287095405767
568.2450683693028	203.04402415728418	239.0664457012739	273.60558276779204
528.1537238131893	207.26228939795783	262.7661811519455	265.16905228644475
523.7754425313248	209.70973320726233	271.5227437156748	260.27416466783575
512.5384090095802	217.1363221831542	285.622524676012	253.79527279920381
485.0769426323949	219.96276819893893	298.0901024240013	248.14238076763434
473.10585626092086	225.80254012891567	304.8460931347763	245.0559279237674
466.77595188691	231.09752366206033	308.8588340728388	243.1130286674373
466.0942735952011	233.03161185420765	310.22219065625654	239.24485228314268
465.76784224256835	234.16619419601062	310.8750533615221	236.9756875995367
501.70135076131504	234.68191088563574	299.2635169770896	235.9442542202865
525.3291185119533	235.18234025074383	302.49023865452347	234.94339549007032
566.4298271931427	236.30946776088177	287.86316953219523	224.24234693978815
605.7307666885986	237.89755481989772	265.60485047478005	221.06617282175625
609.6222592131086	240.03635909396797	257.8218654257601	216.78856427361575
615.7773555194558	244.67892590187813	245.51167281306573	207.50343065779543
631.4616628148359	249.51029626493656	242.65432207237183	204.96850589419518
648.9293845645645	250.70557961435026	228.8476683965343	202.57793919536778
660.192505112921	252.94902068849674	206.3214272998215	198.0910570470748
647.2242115329364	260.90536573813864	187.6794188008428	188.5467377562121
636.3968407471867	272.1258855037568	167.86043838198697	177.95533307936284
648.7896013337856	298.24947589046644	186.63761753128904	158.38017754781833
666.6255911809376	257.9372147130891	199.82477876481084	163.00159179262187
754.2646082858392	239.78964814860768	161.50129777489852	199.29672492158466
765.6996713223463	244.75797940695347	144.30523114918873	234.75253798332693
765.4435054083303	243.56806684205273	144.81756297722063	231.2055853710329
802.5846353526742	234.51626299994007	158.77169253012414	208.13221131584882
771.1824739055321	255.3860919715149	175.45659644225958	200.98211760931082
745.9129513091359	258.0827250208829	190.44707806124168	195.58885151057484
729.4376204833669	257.76668406365366	199.08105506402802	190.14176226284548
705.2361926915388	257.74896518359304	198.45119847722086	184.04811100165875
667.6401955426373	260.84472020784415	189.32758436369244	177.8566009531565
652.766413732239	264.30060700620186	184.3848121284011	170.94482735644115
660.9791291773739	270.5822346270819	167.95938123813139	180.76053838684254
655.8641651105993	276.1117151648285	150.7356735466273	186.17375880638127
681.6848130158141	286.6008713549089	141.4809178082462	196.98535148025684
701.771595930934	283.84022066578893	138.49296058356762	186.56996345611338
702.378596459447	285.1147002289374	137.27895952654163	168.70575023627515
707.2393433627784	313.4837903060128	137.18206333361283	179.33975337826263
713.2112589343213	336.36552620596206	155.0794128011919	173.36452239258404
705.5854217231486	309.22472268785907	170.33108722353737	155.26135298043374
721.8783714941801	312.6319059928599	158.24945492561278	153.57305318146666
719.8709662977171	316.682036155555	162.26426531853872	150.38324547788733
718.497681142873	321.4427969878718	165.01083562822683	145.78441781150377
694.6972417926952	323.58309383849456	173.47514175961817	141.50382411025825
680.0836188486419	320.35071203408853	182.88676206378867	147.96858771907034
665.0466740719382	311.2495544052103	192.148407549075	155.76478094276635
663.0688779215466	295.54722101441274	196.10399984985838	165.28363652235888
666.1352995409505	287.151344738464	189.9711566110504	176.38942169250407
683.1727744259728	272.8111485854557	196.27547369854292	176.2274805288514
673.4320176850551	279.95238951529643	204.0288593785778	167.80906257007024
684.2768802044346	290.64333004561496	176.4903681949561	175.67101223374664
685.9352415020153	290.89581340253693	173.1736455997949	180.71189027792468
680.4053635850677	292.72606884388176	189.8060858974155	177.05137939523507
660.1996535832967	295.7445402012593	195.5590463741275	171.0144366804799
648.4505003245163	299.13564347053364	195.97905388639998	164.2322301419312
650.2395370054833	315.78825440789115	192.40098052446604	170.59676533251894
639.884992943628	312.6275774908297	201.682226302484	159.77635564810316
638.0133219983747	311.11485113721903	205.42556819299045	162.80180835532454
640.0637651933421	307.08831631096575	207.11381764292503	159.2766063280933
660.6085645570373	305.5688992513976	212.08517844317228	168.07306038818436
680.2259804519194	298.36409546883567	208.71057751902288	182.48266795330818
666.8122913266523	288.68015478007527	204.75265069834785	189.53642730234537
667.1599354870484	287.65339832841914	204.0573623775555	191.58994020565768
664.6978047285116	283.953221786272	202.75173111969139	198.99029328995192
660.3192534472324	274.1212544490337	211.50883368224984	199.67449778279735
662.7327551814979	272.29854310054805	213.1564877493359	196.84526294415156
666.8999125655589	268.75710455937775	204.82217298121373	203.9281400264922
672.1491681755534	267.9055614216653	200.7606707151635	205.63122630191705
674.0156709267599	270.9729672997976	203.4274226982206	205.8961720311225
675.2910728030533	270.2703559795574	200.8766189456337	207.30139467160282
669.5836787362293	270.4547737954677	199.4358047936308	206.93255903978218
671.5152606770336	273.95845308566464	195.57264091202234	199.92520045938832
688.2521994129668	275.98230998366114	193.23985428195186	195.87748666339536
688.7886927147315	273.2152909354932	186.03907073291666	201.41152475973115
692.9579992452943	276.1952293147068	177.70045767179096	201.55203144196645
680.0440307170136	277.8094647419561	155.77218225218851	204.29308714698823
691.0432884531851	275.83070541372126	150.74596741704747	202.5931722577238
687.5886838989425	275.3499992887119	146.55637709880892	203.55458450774253
673.2838106038403	277.14552580932326	136.69929185108595	205.4587931576524
678.3104333911015	280.46827263146247	132.00709319636843	204.17434643317893
679.9467504815339	280.6842386524739	128.73445901550375	203.7424143911561
680.2435591858572	281.38501074587253	128.14084160685715	202.3408702043588
684.3450942038207	281.9235775264619	125.10930980275532	201.2637366431801
677.0908056009724	284.31716379804556	119.19935191969255	201.58119787220255
677.8243922566303	286.3453798461205	117.73217860837687	202.53460714143853
679.0133224682356	287.7489547082638	115.3543181851662	199.72745741715204
679.4049715715356	287.24649367390174	114.5710199785662	200.73237948587612
679.9052753431021	288.95888628797445	113.5704124354334	202.22643558460408
680.0012943791377	290.1183443529353	113.37837436336213	199.90751945468227
679.9787851353542	292.054473315137	113.42339285092919	200.92162544468425
680.2289018217838	294.0588845491335	112.92315947806999	196.91280297669124
681.334696508659	293.6583962971106	110.7115701043194	197.71377948073706
680.8625610380805	293.6619307197044	111.65584104547646	192.89817228349696
684.5925271807483	292.8854929695076	108.94918195194973	194.4510477838905
