# Supplementary material
Source: ML conference proceedings conference paper supplement (https://proceedings.neurips.cc/paper_files/paper/2022/hash/1c8c87c36dc1e49e63555f95fa56b153-Abstract.html)
Supplement: Supplementary file 1 [file 1c8c87c36dc1e49e63555f95fa56b153-Supplemental-Conference.zip › GOT-10k-Results/VLT_SCAR/GOT-10k_Test_000008/GOT-10k_Test_000008_001.txt]

603.5	158.5	326.0	308.0
627.7825768430237	163.3546105705828	316.36783004027086	297.2907788588344
646.2794562206138	190.91168772661138	308.3623140769949	290.49036253328484
670.3342051354539	201.28121653259186	297.9716195454788	279.18100574586487
672.3995566235698	202.25338517406834	293.8409165692471	277.2366684629119
674.4657826045052	199.66728556282996	289.7084646073762	273.41647028112044
675.6546897367083	196.48433021895264	287.3306503429701	279.7823809688751
673.9353297040116	198.24881091536662	290.76937040836344	276.2534195760471
682.165645709274	199.89848822531832	301.0950220121621	264.0253037513693
700.9086984257856	203.83002820374327	299.18789548451286	247.26747906817596
700.7884976043969	201.5665595162854	299.42829712729025	243.19853634375332
700.0319292820409	201.7190973873761	300.9414337720022	242.89346060157183
703.0965969778467	203.40031387132393	303.36422200039317	239.53102763367625
724.2579042187294	202.7951161783052	303.7153284258754	240.7414230197137
744.514479735274	202.0259419215028	306.00103677841133	242.2797715333185
757.7785425641697	207.06961319958333	313.9519230144763	232.19242897715742
762.5829634889789	237.38757879663635	304.34308116485795	223.01592268894768
770.2497483664138	227.3281426347865	297.2896519404517	234.85465448218383
776.7407650013002	232.76000981302116	292.67341161393887	232.3567130689747
777.3759623093486	231.10778627998528	299.65755626491705	227.40662086797175
783.7812743922318	221.35779658739318	303.40833944217434	246.90660025315597
786.0566853395567	216.1104348838195	298.85751754752465	266.0562735896002
794.1532486229012	212.68963115672514	291.5569211992864	272.8978810437889
845.9964671566239	210.96110380199113	258.97318599994423	276.35493575325694
886.0240334235839	215.61483059263963	229.4935719257661	275.4767352485836
896.2384173669717	217.15982502018053	209.0648040389906	280.3307877449867
916.1307181062882	219.86692077084004	200.02644793333292	267.23003490042385
969.0172071058561	115.76240932690554	204.34324504553277	255.25950756562142
987.5076575056269	138.7068015118184	217.94942918319532	252.73108171339888
1027.2409451460428	142.9402772741474	242.1840773811283	244.26413018874092
1044.8756446011485	147.34139082041187	260.5387677695246	243.1224872817274
1104.5906389155189	170.32590123067922	275.9270700434382	252.6668803622855
1131.4068610035188	165.03627162647683	288.8730186317491	263.2461395706903
1177.9710969249993	159.2465133372315	308.7463717450077	266.13320807562565
1215.1351725986085	144.83724013834927	324.8882368623971	258.76374788754686
1252.7653155433209	147.9402551933656	313.86422711232217	252.5577177775142
1324.255353107495	150.907543404284	313.39549692945116	246.62314135567738
1367.8000026925247	144.7034100706474	296.73423859157833	250.22790291892738
1399.386568921627	141.0814681940377	293.80163265772944	248.8659971686674
1433.6972711731526	126.64116295826923	293.48918160147883	243.5921309168042
1472.9941002339724	129.1817181299756	274.03742603226107	238.51102057339148
1505.0868211389577	122.76106141547561	266.319446177632	243.28555372305692
1539.6863940743267	86.84042111555632	261.30610732665446	250.94102730313517
1549.13999176707	79.6211481190241	242.39891194116808	265.3795732961996
1553.4836205924234	73.46001188858585	217.72272631002585	277.7018457570761
1533.3443900723946	67.23758816461245	203.48760600882747	282.3590387277006
1538.0580534360931	69.3574035611835	194.06027928143004	278.11940793455847
1515.5816527781108	75.73002173439795	187.1683904266219	272.78055589824004
1511.8401579024217	110.38425260531659	187.43952668509053	253.95506860676915
1499.246024050165	115.07755928676036	191.8337845546749	244.5684552438816
1465.913889661186	140.81707143638533	203.61868867626978	241.10887501894956
1431.0673414879054	166.03690567115484	217.3329076811072	239.65072422341868
1423.3408927751434	174.45670308806925	239.98025186309883	230.00557614605776
1417.6681680373574	175.49595001474833	251.32570133867108	227.9270822926996
1410.0459064516583	172.49423414502544	259.02518572054356	233.93051403214537
1387.2277676703443	171.1441695022663	265.8586295429993	236.63064331766367
1362.0651313069952	175.2416663958574	268.72468490548704	236.34551909118332
1356.0021472995456	174.80441547281384	272.90087865480376	237.22002093727045
1348.5608325224841	171.39173649097233	271.7265369334644	244.04537890095347
1340.5933776719382	171.92186936048068	271.42251187633667	242.98511316193677
1332.019347475459	170.07795356327023	272.37494774856935	246.67294475635765
1330.905570513153	169.9605548033153	274.6025016731815	246.90774227626753
1327.7675017079187	168.39050744148486	272.6687751806684	250.0478369999284
1319.6519149115393	168.64660247793125	272.4402879646534	249.5356469270356
1315.1754628364256	169.09142064766516	273.175077375289	248.6460105875678
1311.456242996556	173.06827163905734	272.39813218316647	248.90769347664502
1295.1042797644614	172.07151172171748	272.272232081963	250.90121331132474
1286.5752262876463	174.1076748675782	272.8558725350015	246.82888701960331
1267.2988328061665	174.77844388331124	262.3199856964318	245.48734898813723
1246.6964503298857	180.59014228754592	255.54954581147106	241.85981965258827
1221.7306194018242	183.14632200558293	242.82139449395623	236.74746021651424
1201.8684062021157	195.9149716223953	229.6810229475475	248.97073094419346
1216.1354873092964	210.4054599865308	208.68315320419356	242.59863162894533
1243.986098638164	212.01051787936325	188.49083316344823	239.38851584328037
1272.3891345338127	215.03307333815934	178.76906225352786	233.34340492568822
1270.380926151039	226.95570894505192	189.2611970216859	209.49813371190302
1286.2355025390157	232.7968578657956	207.77326410399587	197.8158358704157
1286.9769692912082	241.26440115952724	219.0638279634838	200.04099532876222
1290.5341286236417	255.3738434444388	218.54788536944045	204.81399111305672
1314.0043087542492	269.87388307729736	231.60367685033685	209.14510725962379
1328.0110020497004	281.4625086431151	231.344980808454	220.66121931426278
1346.4963075939527	286.53638671029375	222.84521277032894	231.86659546769016
1362.3569873405606	321.6606023994674	241.24709806984103	218.90187242388902
1359.766068977026	320.9478680092029	246.42893479691028	220.3273412044179
1361.2812778434536	326.9565168564633	250.74613574303007	230.35289954682264
1387.4323232699214	344.1139459358593	259.04133212366025	226.3366850048133
1394.6414446206213	342.07131228923765	267.54131706359124	230.42195229805657
1440.7784805403278	341.45033162972993	277.1416486886884	239.50040619126509
1457.5745327893426	342.52494888165745	284.2030194092143	245.48186673112124
1461.70301593223	341.3789143849208	292.61789383214193	247.77393572459465
1457.538997497314	341.7893545040781	300.9459307019738	246.95305548627988
1454.8310858377422	341.085882169132	306.3617540211176	248.36000015617216
1452.2972891581453	340.068432005462	302.70551821608115	250.39490048351223
1463.0586402329138	339.09209141862635	289.8833144831477	252.34758165718347
1482.094790167897	355.04334975848565	277.4128728409453	271.64878143299205
1488.8990482612483	358.93634405363275	263.8043566542424	263.8627928426978
1496.3017138746297	365.5998683233307	257.3087443044562	258.84546318027833
1471.4214607734193	391.1962538148969	250.17042453683848	280.80832558719464
1461.7026553817382	429.1512186802736	244.53286720146784	271.76551083972936
1389.1276268162164	462.9643284934247	259.63724360596694	261.0342765312904
