# Supplementary material
Source: ML conference proceedings conference paper supplement (https://proceedings.neurips.cc/paper_files/paper/2022/hash/1c8c87c36dc1e49e63555f95fa56b153-Abstract.html)
Supplement: Supplementary file 1 [file 1c8c87c36dc1e49e63555f95fa56b153-Supplemental-Conference.zip › GOT-10k-Results/VLT_SCAR/GOT-10k_Test_000009/GOT-10k_Test_000009_001.txt]

119.5	375.5	442.0	219.0
238.03228809550734	365.5738558998404	419.40138042663045	248.11257184877857
329.4991783606898	391.74663883619377	403.26997161390506	279.16819183489145
424.0707734526109	388.2245994354587	385.36742671327227	286.2122706363616
524.1997233112277	387.4940524738188	374.9591358291291	298.2205650503686
584.430566657899	428.907197817662	370.9216816963332	278.89840121388966
638.8478060288553	483.48181957496104	343.74881794117016	282.033878306072
685.7951904476586	537.1826339244701	348.28262220835575	243.53225078040816
778.6434729746293	570.8097568784295	320.4030096486382	250.544806046242
846.4253914352585	557.1265235317882	328.4305751425835	224.0644968338234
901.0921238178848	670.9300537875911	331.7006972994883	213.0027957879048
965.8282329774182	614.5306022529749	321.6056224102997	197.89761661083884
960.6207171017626	654.85505977193	332.020654161611	182.2323627756441
976.0150085737381	639.0928284086689	309.2441990508976	197.7325698356911
975.6074462680408	640.8137041596698	302.1238667877114	202.2262752082698
948.1183236349252	600.7727858898621	325.48821069509984	219.08030903019974
975.6242061279452	559.4155254033348	287.546155763519	242.05084481264856
960.8014422674521	611.2496105977508	317.1916834845052	205.0419799593535
1003.753639757132	510.18863681142517	296.7001283709553	227.2786179010276
965.0664415240911	595.9318744969892	324.67347453455454	187.52827666985274
1012.3364927463346	530.326728869603	310.0689330637572	198.8352264640909
985.1400811622191	608.7684501929941	308.69811178927057	161.4453076231321
986.3467084556446	585.829241875993	306.28485720241963	170.76132010253923
969.1264395907701	557.3639693880274	288.6708526913758	168.20095966042172
944.4989209631751	642.9160168211083	302.26575970343396	168.2654899612922
936.4173934989617	539.990537299275	289.0910721093579	198.08999386994117
888.1934558667017	659.7586571457817	293.8756456145774	187.71200857517925
891.798745991536	541.7523292919067	286.6650653649091	205.12709057388275
861.9062652949968	638.5113736384537	284.70522143183	173.6891158619511
860.6438972208587	556.011129117851	272.8985835524953	188.210177613242
863.0445867386387	576.4270955514729	253.63546014365943	183.5326056791882
879.5849144807537	560.9169666328011	261.72903617571865	193.96574775838727
907.5713465049267	507.1148216717304	234.38190194125517	187.06711842499908
902.7788281162648	560.1440529668026	250.59346644871755	193.65962724720748
924.7994736237134	496.97404794246074	227.49737708741873	187.34669348976803
944.9270445497048	579.2834310434769	232.91949925223335	172.81036620007018
957.3741647523893	529.5693034080762	214.39715150103302	170.28833900417283
975.6682173496322	598.6481279991623	208.04942185871653	153.09219203067772
978.2384178397853	569.4911568079079	202.9090208784102	160.3690907050232
996.1881438558345	587.5196469250396	201.27617336838497	135.73431197811738
969.2967962361154	606.4582936527904	202.2378643877073	134.83172147669688
984.9969909038159	586.7903670421717	176.11905606040736	131.91492663312584
980.356329002044	633.2667730637019	185.4003798639511	116.37692414854592
987.6793443447509	590.5438099835179	166.03313025961054	126.28334760608337
970.4759701843664	654.1145310010718	163.69782651391148	118.55357478699673
972.9300619935386	598.7857540881532	158.78964289556677	122.87510799446588
967.0400192088644	650.3277213962224	157.28980356037945	121.60393097977081
967.6575249810783	610.6959963255771	156.05479201595142	130.7389085150551
971.2130620460615	649.7782970885365	176.0159284598332	120.25483342375657
966.8522104780435	632.7210751275443	156.86777373160098	112.56449054933864
998.3932253567857	655.5650326583932	165.67301768490105	100.70588076330412
991.214127777688	652.0083047984779	146.72212610139422	107.81933648313463
1011.4616302569292	646.169935449419	138.20156674310442	99.5120466811323
1002.3506509165521	663.2077558643583	130.30578873218724	99.01635302625931
1025.8137416823336	645.4522655743914	119.40919235450559	91.29183142153579
1027.3893417659876	675.4099086960006	116.25799218719757	84.34825651906478
1042.7273794730784	641.4666156156503	107.62593876145658	86.10277671444372
1042.1459282349906	691.8850612360446	108.78884123763179	79.69607559239972
1044.445416153307	650.9814251667725	98.27103807193473	81.59917878857158
1040.7702103236563	696.3514946915163	102.79189142718303	70.08667225255725
1028.3380645173831	664.9106774376221	105.97386139816318	70.63163204084185
1019.6581508844845	699.0016966660367	101.19583857024136	66.09591260345451
1001.3299524635713	681.3562857934221	109.03246869389883	62.087052460271146
987.8557548726808	699.0368773446859	95.94102519561547	56.08841772312425
964.0745142480713	696.6472707939353	103.15382483268162	58.494120141557765
964.2732769509968	698.0936226496104	97.71383622170764	55.601416430207294
942.8368988746661	693.8160614681186	85.58129671586853	59.373469605495345
948.4769552122481	677.8673102879903	74.30118404070465	57.16988828449711
937.0333738602026	687.7336665111216	70.33019533413926	53.96526901402302
948.4003071544905	658.8537344168147	63.221631812006876	51.17708382016755
949.7768520667522	663.8244163721649	60.468541987483704	55.628172298250036
966.2149316986402	635.7701401284756	58.666638715572674	51.41611021318528
971.8780454325467	649.9284044397966	64.66687405379673	49.08927579959882
983.7705215841753	620.2091398405247	56.96700379202005	51.33640218399002
988.7329250899489	638.4171010423838	64.09208788618898	55.84021843399077
1001.5267587212678	615.1256105467667	57.380218214300186	55.23370544835283
1017.2246008291922	648.8320328027439	66.77197672331656	53.43544271118137
1034.7316502774963	624.4979290281028	61.99972287021743	56.740882695200156
1052.8060769451683	658.3429441273037	66.97925933627788	52.6129094626053
1071.6565546689044	634.9908355677915	66.87712248538344	56.078485195565094
1086.534621279493	667.2807076488912	68.07204463806771	51.46641082022185
1111.5985670207544	648.5889497965488	68.64877606092043	53.16889559149442
1132.0472537356918	673.1814206220305	71.78518745293403	48.01773876241985
1154.3485195731691	653.0002267637764	70.36183163759226	54.58772798010065
1177.9132312458914	669.4028575381608	70.36326374283071	49.275465444230406
1200.2183377071801	646.4653604421833	68.91814705646263	51.98536339997624
1222.2446650753059	655.2128671349224	68.54981330818829	47.78557814127395
1241.334087876777	633.0749591865236	68.6905770809183	50.09229805519198
1255.2842104423821	628.5656653475245	66.89830700573874	46.0568982051751
1261.9463187448966	613.6672951814471	69.51521581902799	51.056332331057206
1269.3487030005806	600.9180674489547	69.8559949184015	46.26369257455927
1267.4167838374635	590.6906060690045	71.90063685229161	53.984240588052536
1267.1668795124474	576.9230328370274	70.4230323998548	49.88077741250538
1246.703893540876	583.576207732798	73.59638984305599	53.5631041459381
1246.4034745258812	563.3898247911559	68.20836032027469	52.01379715982669
1227.4497228570278	586.0572398183252	74.00348989653173	50.12511984156659
1217.3995206678705	555.262241506107	68.8095595900802	51.3978568330984
