# Supplementary material
Source: ML conference proceedings conference paper supplement (https://proceedings.neurips.cc/paper_files/paper/2022/hash/1c8c87c36dc1e49e63555f95fa56b153-Abstract.html)
Supplement: Supplementary file 1 [file 1c8c87c36dc1e49e63555f95fa56b153-Supplemental-Conference.zip › GOT-10k-Results/VLT_SCAR/GOT-10k_Test_000010/GOT-10k_Test_000010_001.txt]

783.5	272.5	217.0	118.0
779.4876080089805	264.33321433850983	213.58942247447547	112.46284830785316
788.4202496256062	258.0407807428834	205.8692669205892	109.8300239800583
800.5668505805401	245.23186977920858	201.23123940589105	110.87887791344599
803.7389735385115	245.50344352297492	199.75035273382923	110.3357304259133
805.0571836453659	238.77576215430676	201.94615729292218	104.46219407204279
792.9638028410255	253.832142105246	197.54960968520845	107.6966282559577
774.1131052872523	255.16746506617335	197.21359119924497	105.02598233410296
752.8363387444111	254.38866038653288	192.72711337518655	106.58359169338397
741.4120460342446	254.05263246082285	187.58873081278006	107.25564754480398
760.591126975974	253.54645257525007	181.43008706818262	108.26800731594956
782.1954971226573	253.7143194037514	174.4266022511478	103.40661672440535
803.3832856049447	251.56806703045055	166.76656553528886	99.02023640882814
811.1241277257009	252.8635739816202	159.58785719561388	100.58071045740752
816.2956218733541	239.9645150161703	149.24486890030732	110.09597636089032
821.5822614627058	221.8982891912187	138.671589721604	113.64876524206915
841.1141823734215	188.4128848596634	127.38837475785317	105.2150152914753
847.0975867193688	175.91206884071312	115.42156606595863	100.94558904620999
853.152123053104	185.7199334758501	103.31249339848826	105.16800783389752
844.4893168415633	202.22658753302542	97.65623088549455	101.70282463735752
834.2251938125821	216.74509329967972	96.2090199953551	97.78062104473698
836.4262798965901	215.75727207130817	94.86177774070802	96.70133358811113
845.9360578450838	213.30144545129542	93.94246466471941	98.59627969130352
858.0720004779105	211.95267543608392	93.92565757732258	101.29381972172649
870.0326463636466	224.2225122003711	94.59456576385007	104.41812114590174
867.0201743826577	234.35271587746251	97.48640634699892	106.08943744352212
865.742810284225	239.10329812429558	100.04113454386427	102.99867904904428
865.1069909947435	231.6291565507525	104.51016569686061	98.76260675193132
888.1596045430383	219.96839258627216	106.41733009547593	96.47752588344937
913.7488522556954	211.46037179392195	103.15237279464174	91.1339163433925
913.0093620149388	189.42395951655533	104.63135327615495	89.33429958098975
900.9496513099184	187.22885108196576	107.38536428073638	93.7245164501689
831.5212743143508	105.86287583979673	100.64027111582382	110.85461977845912
860.2892330059599	137.50659536835605	93.04920836201832	127.4789481284009
753.8552529018042	123.1511640378644	115.49139081915095	118.10465523914846
823.1076161410194	158.8788312961404	120.45285765015433	101.82862584160955
830.3728733500485	111.0468643810867	144.39399267548973	92.5698793715525
701.2391398457945	88.03844768510055	143.00790602321018	116.33069387831443
779.4544079377516	175.22836412392547	141.5667127597151	105.09753775900052
798.680454673205	174.78446928228618	161.22233591492787	102.11147966720449
852.6009659676286	70.09055312726309	148.1594140095333	126.06389759658249
798.9764469167592	215.7434640984439	190.6838824522216	102.28629691162993
657.2641645088086	168.32538073385558	191.33281728135734	119.58721025733863
628.5695983288031	76.2162723254046	180.63043434683652	157.89503715738655
714.9596777930557	201.5758095268542	220.97440378769258	136.28440075155086
615.2556669982499	57.737545343170225	202.51036619552903	161.3971654896001
513.9631881325213	203.80342803405202	239.16670360567142	138.18419855962264
362.25825273801536	223.97609248563927	230.45442705054694	144.9516466140537
423.53236887599434	66.0848190758044	242.99546588697135	172.93531149864782
376.80452858120753	257.16490324062806	232.02203923265643	169.33065692809652
593.5969354601746	69.54922697475452	189.11218480544358	210.59793132229166
696.470704771729	257.4128499326392	222.47484308193813	174.65885994806402
555.8906101515979	183.12448048249254	228.95487911172262	185.89552224311848
498.38038917182763	85.35485020580214	233.0626743263798	205.27940267227257
676.8632779043776	227.78410645436622	248.67300047019205	196.403189144709
773.7942111212525	88.44621785594273	215.74166507825166	209.1937411420452
810.5409264887353	239.16581452713643	256.00709250764237	168.73075182377002
700.1785371416046	168.9084585517396	210.59632899443	196.13785833638724
819.6274602584979	181.8848610885413	259.8897763845363	157.37655132394423
607.6187438528207	241.54401654845245	292.6257569169655	148.9213185498175
725.5671257652878	121.63519988955139	262.55339747057513	176.0537340097908
550.8641004891732	248.9562502537759	316.3973907259299	141.36479219994595
561.6750273644569	201.9065476136453	273.54789135663987	178.857142496947
691.3050053291021	200.93267939355673	297.70261532530907	152.46341094732816
609.3020293968063	242.6636441989172	279.80273503228625	173.94715373523084
726.7962390537605	158.3530098119338	250.62408581954398	186.43687277727867
604.4176045775927	284.9528348298493	282.589035517327	152.8938103590503
632.8864176843822	261.19592568709254	232.43294569566703	180.0630194688062
607.865383075059	304.6757362881836	263.026320848257	138.48368442075602
598.2813820314542	293.453176309975	238.46893921902227	142.18935421298292
625.8705010447791	278.7907453977127	272.48803226351555	123.94230613289773
567.5889250339833	320.0938401380478	266.40220082884935	108.79305755316942
609.7289564861426	241.12219749232327	228.33643836070513	133.87022909061736
586.3350547264213	305.96322041132737	246.84756664185915	100.32887906279004
597.9576520268718	280.0909593395751	212.9138985735928	114.6637440705159
639.1192064295518	259.79104699540477	237.69845662733655	114.46064805062656
610.7841675077093	305.22275413868573	223.385191992574	110.96134758369247
636.6341005356845	242.12749732759096	213.208143031829	128.15446633096735
635.9715493512083	305.21557219187434	235.8688838963036	103.32259945613066
625.0784728236699	277.45108052997733	215.7458622646894	116.94240809323375
690.7374236073521	276.49120770763255	203.59329003408521	124.04325501343462
650.0918165922559	326.9392762602943	238.79128847517694	105.0906122887344
697.7734609024523	291.7689864358124	217.79809421472845	132.9339951605873
783.5265608866521	333.21506022505537	210.77498913543337	126.80062519701677
831.8041626523938	313.56328758703654	203.89258587395756	129.18007624422776
852.8991034934543	274.11929496890343	203.39985815523698	140.31018628996844
807.9703330359995	353.0009158549741	233.96836381169004	117.2947519234097
835.0698408906444	327.41287998933717	223.4084078256752	130.28664639681796
784.7363045897316	251.34038841683227	197.08034911076766	155.4364982250948
864.7170267690271	374.06104530174986	242.163798227188	131.66533956337992
865.2772462905314	316.8300242672167	223.57608929632084	147.14618560124748
827.285323423491	382.74683498301926	258.91061870048935	119.83937758941639
738.1948423291589	382.90042605287044	255.33288029265552	119.53219544971404
798.4001913900124	307.757381163321	256.8426604198843	130.48059580145775
711.1266245133199	382.7329524439852	286.9606675869069	118.9406995520599
681.6735425031768	350.1718631303006	264.5682341058932	134.03297202478302
684.5800866856638	285.56195604352877	233.98529469760385	164.17338202506556
625.6030583071433	390.48653662985345	264.4943263067457	154.19856404761416
665.465012222227	310.5362958311269	243.5957103927809	170.3038876276837
582.8923744630102	310.9706221579411	226.9508204093247	169.43523497405528
