# Supplementary material
Source: ML conference proceedings conference paper supplement (https://proceedings.neurips.cc/paper_files/paper/2022/hash/1c8c87c36dc1e49e63555f95fa56b153-Abstract.html)
Supplement: Supplementary file 1 [file 1c8c87c36dc1e49e63555f95fa56b153-Supplemental-Conference.zip › GOT-10k-Results/VLT_SCAR/GOT-10k_Test_000011/GOT-10k_Test_000011_001.txt]

0.5	202.5	1074.0	605.0
-4.258259033565196	239.04388730312883	1030.1529445843394	583.2757988765334
-79.38215347097969	256.8721309917513	979.0927401798087	597.9463098191284
67.95745604741774	332.1481208042429	930.9461257323646	619.9671534066908
174.26814105646207	332.9603955534032	888.430174980809	642.6433780893036
214.21767833975406	322.04920365927717	832.5646987244019	664.4657618775557
248.86157342075592	328.731448649236	786.8150055121798	674.6393688474197
257.9408493317975	374.3469220017415	745.6583795756133	652.4026444858587
199.3653686255547	347.33086595656675	708.7781170426423	662.425835448935
143.42521584086285	324.09097894759293	691.1143523916205	687.3149310968151
-1.7131589127101847	159.04038458056363	677.4857217105384	670.0956853300416
63.24882224730868	306.1971123859708	653.6701327156744	694.1073496947487
-4.964574738836404	388.46995431166977	620.317295857691	656.8963889660558
-4.993456666794145	481.57239312530976	600.2635207206154	611.4722842897131
16.729867821798166	505.73385935602806	575.8991212641923	563.1493518282765
17.1869388298515	516.238940811389	574.9849792480857	542.1391889175545
73.60667940000218	521.0366426164885	567.6891306838901	532.5437853073556
105.150454955913	522.5433926693347	556.5744570674581	529.5302852016632
154.91199748722448	512.2632936756074	542.5648022026512	532.9877971495546
208.02041516535496	485.6527496719295	537.9739769039527	552.3335484710564
263.9203698118513	485.9449739681741	529.1930174039794	551.7490998785671
292.02298903914715	498.7570116562114	524.0531307979476	543.1468084520125
354.16315178563855	503.5210964979164	534.2178115247787	533.6186387686024
415.11247008291116	531.2289299835109	530.0334246605883	511.83561457751495
486.9546685612236	548.4096838231453	501.196352881144	493.8808676378434
550.4003655689434	564.033431167274	483.99776965360707	478.3037744907149
615.2766259994196	569.9727357937572	475.47955842060173	466.4251652377483
673.2741082665225	576.1818939130053	478.1483852281076	454.0068489992524
729.0286097804571	583.713006195311	484.06641550859206	438.944624434641
805.8650759092745	588.0721451392615	490.23738898003046	430.22634654674005
884.9946501611605	590.1231998000137	505.8316971487971	426.12423722523545
986.1231448847368	494.0325330330688	508.85734734776264	442.34902249102413
1148.3714074801433	379.03108712007355	483.77024249529927	492.70626211400474
1161.154618288356	215.62535510137985	504.3360861958421	527.3467124772616
1360.1187375067013	268.71183858210895	496.3109569725626	486.1575970513719
1085.1405795339829	292.07862578635854	458.3411842460441	547.7261968719172
1196.0804769907138	372.67842244004237	458.0525523844047	544.8060057444227
983.7262681836344	298.00182182626975	519.8608015292734	552.1547932231151
980.0241591781465	314.4350930967376	561.0254599368548	519.2882506821794
1120.9161111331507	293.95075367787666	534.3861538089004	543.2472896677644
1140.40551363341	165.17804428813702	495.40734880838187	597.1471647214684
1209.6840411149033	202.7828880643038	545.9064461133537	607.8720918363888
1103.1596689190192	338.93541799832246	595.4864944540768	589.8516702699771
981.1880474913028	422.48246014691813	634.0961470691477	553.4244161257434
847.7730131413722	394.5794536030189	657.9520532533386	534.4691484394893
851.3947246791171	401.09853260768284	669.4617277767004	521.4309904301615
936.2079922943065	312.94032574272626	612.1429489640442	566.7216883393985
1016.2140922223514	277.4758743850402	600.6215659587151	619.0892389484255
914.2219788865762	268.9756885442317	650.945842776187	636.0896106300426
963.0511998035072	369.5784607931769	634.3591500804582	597.027564408419
730.7076398296622	385.0942999310803	653.083428991684	565.9958861326122
673.4178637754418	388.2386843882385	633.3620386760197	540.5212683005665
681.2013209410572	391.39781991389935	617.7951243447887	515.7311056393306
700.7807142377064	395.8905551769605	578.6363377514905	506.7456351132083
772.4690580333394	395.91097048433767	589.0089314750201	506.704804498454
761.5454054511904	306.730374184884	576.3699159209045	547.1207142237079
772.1563342321745	296.6129826579494	608.2218587256235	567.3554972775771
720.4245628114277	368.7365584693454	619.1342390520635	552.6799731758598
583.0242116623326	440.7573188353878	654.1324302502464	519.3165344899322
397.043660371176	454.7405147031035	694.0115997624387	491.35014275450095
300.7697615076353	420.4362765344218	663.3740112704654	504.16227253710065
518.2403145888193	397.42437421087953	613.6487192736249	513.4988567874683
314.3607704526586	434.9603289663393	613.5527171250553	509.3582673497473
408.7739140767584	354.6307944669988	601.372384744986	546.3651679407373
458.55349900494735	352.30014397101144	592.1602988575131	551.026468932712
