# Supplementary material
Source: ML conference proceedings conference paper supplement (https://proceedings.neurips.cc/paper_files/paper/2022/hash/1c8c87c36dc1e49e63555f95fa56b153-Abstract.html)
Supplement: Supplementary file 1 [file 1c8c87c36dc1e49e63555f95fa56b153-Supplemental-Conference.zip › GOT-10k-Results/VLT_SCAR/GOT-10k_Test_000012/GOT-10k_Test_000012_001.txt]

831.5	199.5	427.0	775.0
852.2805921194459	198.49890457766742	403.16856871215606	776.0021908446652
860.7053404047439	207.54283316864075	386.3190721415601	757.9143336627185
890.8064672022474	252.67384664288437	397.2379507605732	738.7734389282515
926.7469495645594	354.03215295830165	431.4769506056618	677.5501123903667
876.3281164403116	387.1181977776955	445.52870886126294	611.378022751579
896.6942688386379	426.7004801490012	471.167968471864	548.8063491107811
949.1898266104623	459.95844533234606	478.53350461886725	498.3413689856132
977.7897691492713	483.0187553006359	482.86588205353746	467.60381467710545
999.9357024191263	497.37878196641077	468.5091040998551	453.8513056385696
1011.2661679395536	485.0491974334377	445.8481730590004	463.98557246414174
1026.1391925332107	408.916847941237	430.4295025899238	501.63124170264484
1030.3144169042146	337.17756763469646	422.0790538479158	542.4379259148635
1031.667592540189	368.9763085524595	434.53235219866104	539.4790425701135
1032.8675849687597	378.6144739640189	447.44885407951756	520.2027117469947
1060.4984040358463	343.38999916275935	437.8707229564701	544.9681543383884
1070.374225543357	271.1886468313928	418.119079941449	596.6421320821523
1079.7373219877506	304.8976206683759	399.39288705266137	608.8169189624923
1065.1992717880933	329.1947665517875	412.6775323071287	591.8055374853644
1052.6729345503834	402.76272310488787	421.9745824166115	554.9589949407232
1039.032419028178	370.6220746491955	418.55740403724417	557.843873004552
998.248290014769	293.9381126767413	408.1022534540535	603.8511535711168
983.2833689916456	260.6844221459511	406.3089723815318	638.6354115139286
979.0074737337817	286.9794706958264	414.8607628972598	635.1067739117639
940.10041311399	302.0155808580429	410.4562549687935	605.034553587331
1421.2743703200163	337.7384386048633	419.13195981059505	581.3440980569944
1269.2596351875281	419.0469588905289	471.90269457588704	544.3564252355054
1036.1646032334395	427.44038139457814	538.2450340378987	527.569580227407
959.1371856706153	426.8456326953469	574.8099677877735	528.7590776258694
908.4262434683346	405.1057747557448	571.9803109230623	537.4882797486495
899.655111711364	324.65188278681	554.582903786502	576.1072164097625
838.6599614407824	276.77468415463767	534.1305081695278	618.4456026148056
830.3772475527132	253.3017421267141	496.2799583726104	647.2528274796343
721.0528401910406	245.54917070934135	499.2994360152626	662.7579703143798
714.9112600449107	235.2632283770688	493.3277967574146	683.3298549789249
746.6929345378933	293.0213940579433	522.1121865966462	660.1612624423724
717.2396515470525	288.2609755902986	562.4320312683099	651.0953780676441
653.5532805174888	284.9522006776024	594.3152148021225	638.6150161879737
606.1036407898335	284.0346653600849	630.9752225720415	640.4500868230086
589.6019546236496	278.3372178374375	663.9785949044095	631.8226750440608
571.4316314669318	295.05274536595147	700.319241217845	618.7963683424485
503.13772240952903	315.1635345394835	733.0892890054715	599.3383440608202
726.6300260948744	259.59448568190635	768.1080070572751	584.7364438396717
816.4635063321701	241.8302265511333	715.9749662680235	599.0093088203279
850.9289270184056	279.3949983297362	667.7320484209798	606.6314593648318
1033.788176001081	192.02046367081118	602.9577861204327	640.9398853724404
943.0146997174895	239.5709613337359	569.0515165682327	643.7721728281285
974.694852613581	241.89035889806627	524.7817323703359	639.1333776994678
985.4695384273298	243.00227813486913	503.23236074283835	636.9095392258621
1024.4975018902032	210.6291979364862	478.94876797700033	647.8833654627192
1032.3125444423513	212.9799429441174	463.3186828727045	643.1818754474568
1050.4957739503866	248.3270997272042	444.319780969394	624.5902332195635
1059.682756514744	256.63051464925616	425.94581584067936	607.9834033754596
1056.35503945539	264.30971870208543	416.38211378990485	608.844131439283
1051.1354132597519	263.3412234107316	426.821366181181	610.7811220219908
1046.488937077627	273.592025585454	436.1143185454306	606.555385359166
1038.1046369610608	290.816559349364	436.51786046771065	588.4713761421984
984.418585341819	308.1518964340231	431.209862384457	569.897859304557
990.0300992180535	325.6614649786083	419.9868346319881	550.6063316532676
985.1656971828999	348.374955511287	399.2150599223735	535.6799293678321
953.7567885303647	350.7999441008508	388.61541860534714	530.8299521887045
948.2732710286505	342.62115716713896	385.1463649304201	532.7514373777723
939.6131117777588	335.9721516117163	388.0584001771696	546.0494484886176
933.3291697362158	322.939572345531	400.6262842602554	557.4569438252543
933.2104608619105	317.5705684484998	400.8637020088661	568.1949516193167
926.5578077087573	314.78878740568666	398.96522598364083	573.758513704943
901.9018356076516	295.09664833870636	387.2510532821546	582.6297333870548
906.1846111752068	284.90233304194464	378.6855021470443	587.8223252181126
900.2578737553692	288.83103281282564	375.40772590919926	579.9649256763506
899.9511070632616	302.41064431781894	376.0212592934146	567.7644757911174
898.9643136503654	293.02503475436146	377.9948461192068	571.7498099574346
891.9402399961734	280.8453830053863	392.04299342759066	566.3519227462135
881.3809463711718	295.49203984658817	413.161580677594	567.1192032462155
873.072876435036	314.9849492949653	429.77772054986553	574.3028476819352
814.5409006697898	255.65721249818932	452.21393688603337	582.5592968821084
761.940016673814	228.26882475747033	459.8359735834175	604.8094952653572
764.6327934140559	209.5417184097214	454.4504201029338	625.5365432498484
767.5938637015349	205.80267524401143	448.52827952797566	633.0146295812683
833.2176733727802	217.59707226414866	436.0714415829617	626.3959471692046
898.8025732981637	235.3359646094451	421.5532903092411	607.5826837039042
