# Supplementary material
Source: ML conference proceedings conference paper supplement (https://proceedings.neurips.cc/paper_files/paper/2022/hash/1c8c87c36dc1e49e63555f95fa56b153-Abstract.html)
Supplement: Supplementary file 1 [file 1c8c87c36dc1e49e63555f95fa56b153-Supplemental-Conference.zip › GOT-10k-Results/VLT_SCAR/GOT-10k_Test_000013/GOT-10k_Test_000013_001.txt]

258.5	263.5	387.0	323.0
3.3204641624806754	186.47404541058825	371.38127934914917	319.675545507282
354.25532091976015	175.59122653415852	343.77188575606897	341.44118326014143
243.6731760669087	140.52040034463346	338.33060634251626	336.047645932773
337.5300440355751	88.18866522061018	299.29847681513417	366.3703129758442
430.4159949429919	46.614835009207326	301.98047917927056	376.23034399571713
431.1406438569809	134.7986892928309	311.1956531693498	349.16524088126835
298.85095516947445	59.159465106048	315.89788897307704	344.5174043120627
336.35853881452806	153.31619432126047	324.06511468828097	322.5687318922602
376.36680877811494	196.08526433022263	325.5142016878252	318.49621880105383
346.1610695094772	300.430893408732	355.5004427082313	282.2146399062951
348.8917897875375	306.98459251402795	360.0651669967542	279.13340654034664
352.7278824369096	315.0350161134542	402.6226192192797	252.98663183724022
441.39395945033965	318.7669695851374	389.4041415986768	245.52272489387389
465.48615084762815	320.046118355986	371.02313180478006	242.9644273521767
424.0074450106379	314.8291658585506	367.4331703074007	243.78195755022966
474.63723982836575	321.90622125281953	333.20604341805733	239.20391286827933
545.6919525851725	280.68325900013156	298.90330341585974	249.7787136993779
626.9804127293334	333.34894680742457	343.49436938969234	222.13533293309976
559.7863961365806	337.2229073114611	336.1840087339234	223.24356154010633
812.4774365191963	291.38388408600525	286.5759005068893	244.80253529283388
610.6438241011183	338.6246631267703	330.6901371934076	217.21455640193398
831.0213393664144	329.00896561932313	344.78282551884456	202.11782169184505
858.6659217629438	314.81102218437616	332.1888360587837	213.4356384285398
704.9132003033828	311.0385333410551	306.57649957885906	220.98061611518193
566.2581642861005	272.3958241735554	269.2236736156818	240.30181639796564
491.720592943327	297.9773148394088	281.9453663161148	229.24279094423372
533.1893527375562	271.93405171522033	255.28437571061085	233.09229235007825
543.9930771766608	347.93977936184774	272.12185591503487	196.41562430472337
388.80853932879785	354.7516188537991	280.9595621668742	175.4375216758479
479.7331006686602	323.7303960776972	284.72880070986525	187.50579305270503
374.6486908162425	323.44767521688715	265.58260782206713	195.46849324505527
420.07672160579864	286.68065485230835	239.88319397726968	225.56476881800288
405.3799254719836	283.3173962787113	225.30265392335713	232.29128596519695
454.1214870366579	320.27802793212993	257.52741681406894	208.81197833282766
426.0577291559545	250.97127149609173	262.3176118915302	230.08304392731407
461.4282586792172	258.78411134600185	269.07841256766994	237.70792214429332
490.7499500184541	261.5002626366974	274.2515393900742	264.1838743133412
412.012281046413	182.85791873362047	296.06404078872015	260.3689437217896
445.17659601969046	226.70072137484175	308.5593499421002	260.2654929948302
415.1115827976658	177.4928515780354	297.09100326987357	269.1832661930979
386.2476060638161	179.5730329486958	310.2439708343529	265.0229034517771
413.9782254574247	231.8850901411945	300.0443348447783	259.97431522159366
409.5721558820618	162.4789555809584	282.4158368480915	248.95630717339412
379.0603275121131	174.0968642542631	284.8920758479351	234.08440664679244
363.906080668348	265.3990804260919	258.0591448701514	222.9042482990763
384.2414007986761	195.92127907267604	240.09600493433723	218.04568228190874
404.07357444380483	227.50064330422543	250.9208396251951	212.58887608294174
415.0736444498547	261.0093714717277	265.3863131964862	203.91640148136264
431.80935887082126	271.89469863041995	231.91488435455312	204.26993015133513
607.2793298455358	336.44911936290316	251.7174664133596	178.1451231331007
603.3269906598385	379.71361008315716	266.36680115856257	179.2966745521042
561.0737678598903	343.0738165201496	239.11715317306013	168.7591914890702
602.5039905743187	377.4316727736529	213.85053310332256	183.2345600563467
561.0325259937933	365.37383486626896	209.31222113075262	163.60961530430438
709.1012059952308	270.7817055912393	188.67705957530842	176.9414067602591
505.6784667966501	367.38668750326235	198.2874986099718	167.9563887275163
454.7276234788259	404.42880122798	219.51175733139638	139.97354865763748
482.52722533808355	433.12028777428657	192.04473847161057	144.48138225422937
579.6061629069909	296.77029930912454	182.9099623694422	163.43539479280997
508.8202025810371	313.042283997313	193.63144474525427	169.0561365802941
489.67398810941506	304.82056878110404	157.7154982959944	174.08289387540378
487.7490133278957	348.62288133364996	161.56544785903313	175.2791616233049
469.1034544743817	350.3900089002615	177.64240413783392	177.0484468471386
509.67931302604154	372.63347228766065	185.86157879048704	177.24696595032668
475.27431710996024	365.9889811126136	208.92883090129533	173.38242090491286
505.6619330660008	393.4010508658977	190.25258015180577	172.68554289310526
534.0877563086667	423.4497420791589	179.11202933484856	181.15480396914478
579.5986116695591	381.4077091809735	161.84543689229045	202.83069276001606
580.853701899516	423.6203667045417	159.33525643237687	192.94551319095407
