# Supplementary material
Source: ML conference proceedings conference paper supplement (https://proceedings.neurips.cc/paper_files/paper/2022/hash/1c8c87c36dc1e49e63555f95fa56b153-Abstract.html)
Supplement: Supplementary file 1 [file 1c8c87c36dc1e49e63555f95fa56b153-Supplemental-Conference.zip › GOT-10k-Results/VLT_SCAR/GOT-10k_Test_000014/GOT-10k_Test_000014_001.txt]

406.5	300.5	287.0	329.0
404.95134980247065	278.7036171305249	289.09730039505877	313.4218736389886
368.73061735905634	252.17742525967478	276.15974664973453	300.06835400012557
599.2870975867634	228.6742148807911	268.6720512370844	283.567237651906
700.8769644583336	198.8805308926725	300.2813695401544	264.89158827940634
753.9395221431199	160.57586042982055	283.1162363678593	279.22894166701616
833.6098804237021	211.41018143125194	247.75639330618642	310.39694984218
868.4561633502146	241.8096431712334	230.71962860541004	319.805761231882
889.6224361982693	265.39328675756116	240.2346834380667	315.84480783319816
888.9872754934546	273.3749265472403	267.71569371768146	299.8815282538399
981.2784602419388	256.01593184904846	288.6371726920743	263.119918181924
901.6559047219489	281.2368457628171	300.20728388376676	256.1119138391771
942.8306838891175	307.8267260667408	314.15226882723186	246.70240017578544
959.3340030103464	322.459829430015	325.2275036780965	235.06894268656583
933.3611290458023	329.01686421586373	315.60852168288	221.95487311486846
711.1738193596618	341.3115049924106	313.0137066109945	231.09913378397582
793.7476777829711	302.5928839427197	276.03193097932046	240.18120723538703
906.277243010598	281.12894516997926	302.83038080013625	218.11358019349512
887.7013212291661	290.6875888870647	315.4521925731065	198.99629275932432
605.5785125910827	320.46958597083017	332.332513898873	211.87770540875806
644.2055245468163	316.3434831747404	348.77203583579694	220.12991100093757
591.773431378933	312.41993462136094	337.9149052035668	227.97700810769655
696.9470796063752	300.86009071873514	287.2193403600587	251.09669591294806
697.5748242938503	299.6482022251241	269.01856095260865	253.5204729001701
687.1775948751178	318.4157242633968	298.0410760591752	248.89765390003203
670.552404733834	330.97836873791766	296.87340921514124	232.3768767326407
507.6881972749441	257.23247508303507	264.8777836227904	246.76204431770626
666.7243324945999	327.8352994205318	269.0478081011777	242.50937098273488
769.9556599002851	285.9254450857463	247.81123649846347	253.84930796196213
837.46156038471	265.0446565357456	223.3997574131036	256.11077010357417
866.4655903951708	270.18824467854694	218.22036815790923	260.91749975103653
882.7494913245513	248.44625426287132	223.34248961185548	251.63558794459766
880.86790643978	254.14587011016718	219.62900798999988	247.7130076414042
878.6359562714878	251.04943556593977	216.73651444620617	246.5494828494812
844.1941152113758	275.45440432940075	198.11541741811476	256.0760647547697
832.648820393915	298.396981697506	185.5157728683156	253.01919104022397
807.5301478592071	299.9922243860795	187.55407339612967	249.82870566307702
759.0847178487772	294.16932122491374	181.38831046343984	261.4745119854085
747.3713462967453	273.77596983780336	190.92375329400363	267.5329640758793
755.1039425479314	255.79184188331007	182.65310751898306	296.3066732575143
700.0319191637619	239.57552238580243	217.90318731202075	261.3347419747584
674.300172186592	281.92916030330815	269.36668126636044	236.9418814339375
848.4269727098088	262.1950499679443	231.91478477289317	276.4101021046652
853.4253385722948	292.28606133220126	221.9180530479212	280.20764487860146
818.1378845055929	286.9616604226539	229.33968103820183	282.96228667980586
791.1212812891326	291.592410205389	226.97604783291007	265.6440957374482
753.79309487729	263.9880058049588	239.61785776252782	251.08652128248252
736.2960142721016	294.9513496223507	243.70361755986278	243.2495361205216
681.2175457965238	334.6468950053878	254.16936853033664	240.54397303189472
650.0794772561264	332.6193252815528	261.9153479176126	244.59911247956472
652.2720168506318	324.76092386256653	257.5302687286019	252.34047506377274
666.7009922827363	296.6786171368485	228.67231786439288	260.32894924443104
669.6783383577381	281.3961595571275	222.7176257143891	260.1067759446109
766.1016230995285	272.60725698434595	257.80602303632907	224.49975550221902
649.6870116613034	307.7211336503126	240.13760297254328	245.36205414855343
637.3689776039547	299.170956604432	218.900351760187	262.46240824031463
643.2445298228334	292.10217992213506	199.57649572957305	269.0272100120519
648.1000409936477	285.98473071909564	189.86547338794452	273.902812473218
654.2440462787215	279.6363395752531	184.85086219436312	264.7793966312046
436.46700736402056	288.7487427560457	183.1334149366998	260.660123336944
444.2038568224722	290.32701382181426	167.65971601979658	264.4657449118725
649.0909457029572	293.52646675433016	177.1481455364705	264.829139164222
648.0133007250556	287.2858113342162	172.37748899861418	277.31045000445
623.4975968125693	289.23858657539427	186.24222451837494	273.40489952209384
572.3155446178342	307.71655223635565	194.9292742589485	265.2726773229085
626.8699680499398	307.66396206963117	201.43767595691816	258.1517796212212
532.2107997890857	276.4914323862017	188.48851252940483	284.37764256857633
647.9600796868043	254.11308896601724	223.6900241208644	255.0509762459185
604.7770653139505	255.52286698938929	227.16903723602354	252.2314201991744
582.6235845325788	263.14395100469494	241.28786329170026	244.5362860453298
559.0739650339135	254.48615346261658	250.13344604565395	238.89968738346045
556.1160512841349	243.23495557368597	256.04927354521124	238.29967959350802
559.8724462358975	239.06378649145188	256.3202518991045	231.07448124313908
560.7531246475736	226.28812167890788	246.88596204231072	225.9340787344605
550.2402691894696	220.08228499969658	238.13504477025313	230.90159504581672
509.9940731798732	261.1263036860238	215.2208582781895	252.22013618441864
543.22278839336	275.30928708987983	214.9630024459941	267.9872191065587
547.5408384352878	256.58649187739275	206.32690236213858	282.65066939983507
539.0573382575735	215.03176509079051	169.55527315192316	327.37538756900796
582.8397346986218	182.00971118205504	143.80155445386072	370.24034256746614
