# Supplementary material
Source: ML conference proceedings conference paper supplement (https://proceedings.neurips.cc/paper_files/paper/2022/hash/1c8c87c36dc1e49e63555f95fa56b153-Abstract.html)
Supplement: Supplementary file 1 [file 1c8c87c36dc1e49e63555f95fa56b153-Supplemental-Conference.zip › GOT-10k-Results/VLT_SCAR/GOT-10k_Test_000015/GOT-10k_Test_000015_001.txt]

608.5	423.5	281.0	54.0
596.1484472993257	422.8680307210527	274.9216708175735	54.26393855789457
587.4137074848472	417.5378276683216	277.7385709196466	55.15595831210108
567.4051167369712	411.66044830774376	278.2294080009207	52.088337877827556
561.1137179105597	406.14767141766094	285.9246075853292	53.33869552116378
544.3584993999243	398.5764752478549	279.2827077997597	53.423961558210905
535.2180292671152	378.79911994631146	287.7068050941038	53.55130027620146
533.3072130882229	379.4391831337513	291.5284374518886	52.271173901321774
534.0049481773699	375.8452404281902	290.13296727359443	54.38322755713219
531.7735995205176	371.86988850447915	299.693672925994	57.23592306585948
692.9426352379455	378.1004226957949	320.99742421412316	60.635246501211775
538.1354250738794	360.3464095938616	331.1887400139113	62.24631747545456
713.7294071022294	379.3138124428063	335.1853433928359	65.07039656525978
723.6468251512674	375.63621367988776	321.2840708279988	66.49203055785775
738.4139817750874	377.25842496135795	320.58850110841087	63.24760799491746
770.2714561443007	392.31325090990623	330.9074229056402	61.61252168845769
750.7265184245908	390.0515411582244	340.9655587215698	66.13594119182144
733.3923476703478	385.87990619928087	345.4599977541641	68.44443061453018
710.7608331244618	389.02144570207685	360.01108782099163	68.30373941392705
706.9185318723515	389.92127600655203	374.03767692921406	72.84606540897852
709.3507388149787	390.1544673105169	382.4250601226305	72.37968280104876
711.5757430852927	392.2815340868926	384.7084229576784	74.85892062397332
735.59615124612	391.0978926365148	377.54949861839845	77.22620352472885
757.2310595519212	390.08478852838437	381.60074404710707	79.25241174098977
775.0670502505319	382.89287348873296	387.0644540174399	79.92434469777452
774.3036929081936	355.3568545327835	395.5362965645851	86.38048757239146
785.8961202796321	346.7956493890077	422.6691095010367	89.12642138013487
821.3432159904471	337.95763883370626	412.73385151565566	106.80244249073766
894.2463213376543	301.17637028850936	384.2128191118599	117.81288449280156
915.7506986344242	269.1979511450362	394.5619909690213	120.7892354075181
941.9606816868968	262.2973013221558	396.91167998101815	111.11782571744658
958.6800327331379	257.33689232101455	417.2151927191028	98.00626593520067
983.9677660939328	244.64495399692723	420.6419252795405	84.81714309621276
1004.0537719493491	242.7758917488147	425.51752790684674	81.04733186941466
1037.621947917953	238.81675758000665	425.90036337272363	81.4634682733547
1069.99069759897	228.08008809968413	428.8033046524573	80.38999368674378
1101.6351349885686	221.6622746471129	433.3285298085664	85.69072059907444
1140.605062155127	218.18385691833578	432.40411247355314	84.94601235681829
1187.4027750529062	221.0006445250354	438.5725884259898	79.31243714341909
1216.1161859353986	229.99101356619363	442.3406553692443	76.63042123816236
1259.9674982823835	234.24966002401072	438.77334343346047	75.76179311872693
1298.5008090966248	244.88695719922575	422.36288109583427	77.23325850236796
1324.9848265861442	253.88490048817204	435.8456291075265	81.38763292138572
1329.2098062558714	273.3335343304666	450.3526117088851	88.40424911842206
1348.8681593387587	268.8002011035784	427.0186385159839	105.46228205863514
1418.9187463462747	224.37132687883127	398.83547520238847	130.36688153588025
1417.2678916418727	251.31411103071702	418.2598555285254	124.84932598410691
1432.563357012558	281.8616603172352	428.8437145301699	129.63389099989536
1437.9389829458519	585.2161952317756	451.9864182193694	116.06904339708848
1423.7747344664408	596.0399327511458	471.76913177430816	102.96735176223162
1418.1603325606839	601.8708976947413	482.99793558582235	99.8778832845704
1420.3381359643197	601.804708078183	478.6423287785507	100.01026251768678
1418.8831405757523	598.455071982574	481.552319555685	98.09839558363184
1415.969244616935	592.3836221627084	478.76555356961524	101.62673731965828
1379.0764833962728	570.5440605544984	500.68602884138807	102.08498789478553
1348.6312169327764	564.3836527009234	498.86656787955013	105.44723304638816
1323.0517305093365	530.6264082423137	505.033241336786	109.972502818106
1317.1228288000627	528.6695074784085	498.5470871393547	113.88630434591633
1314.4595494215182	513.8402041467195	485.56027152484603	116.07484945189809
1314.949029405639	509.2704556054332	484.5813115566043	116.1975161553776
1312.7408109161543	492.92579671885545	488.9977485355738	112.86500026740518
1330.5022704416083	492.06851777814336	471.4819252352082	114.57955814882939
1357.0463351391331	489.14184585250837	444.76697268637804	120.43290200009938
1422.4887495816847	494.6174142734352	399.14762782058676	135.0614103640391
1516.7102759257355	455.7075608719316	381.89028886528865	139.51581128155914
1503.2884299390519	449.349901420001	344.843942695474	152.23113018542028
1529.3174220675812	410.49271477670965	338.8637226784785	160.82885711190806
1461.8799615996727	630.705971362866	295.64269813129044	200.48706654595816
1400.866067280388	393.69698543835636	316.5687316407134	192.3274370098187
1572.4766458562121	437.8364251889193	259.6980506541205	239.2696156977467
1565.81391764919	408.9071652793295	210.17461140763066	273.55979964422625
1495.413934815518	384.1979028205758	168.5386336309683	307.7753292747331
1438.935678398853	382.475659299567	155.3474453799942	318.64026932170975
1386.703831756368	399.10555058768426	149.51914057419816	292.7332866181929
1439.578429701367	360.84859503088956	181.22405965783457	245.5384942555111
1291.5568360671732	475.0088733381489	155.59219965917333	245.07109612181847
1266.9924860937867	376.2785143444389	135.7487204267207	254.42587089316925
1080.5573064492694	397.7974032577654	180.67663168993556	199.2420764729675
1187.384564209609	375.52411496391437	152.43887035247448	213.88272496660204
1289.658903500668	398.7461506969273	177.83101663495535	173.18717412219112
