# Supplementary material
Source: ML conference proceedings conference paper supplement (https://proceedings.neurips.cc/paper_files/paper/2022/hash/1c8c87c36dc1e49e63555f95fa56b153-Abstract.html)
Supplement: Supplementary file 1 [file 1c8c87c36dc1e49e63555f95fa56b153-Supplemental-Conference.zip › GOT-10k-Results/VLT_SCAR/GOT-10k_Test_000016/GOT-10k_Test_000016_001.txt]

236.5	196.5	256.0	246.0
197.82713358893997	197.4532422238024	261.19965580076524	243.09351555239522
200.51522653904686	216.2960930969399	263.76381485260833	245.10953856640458
209.08713732605665	220.311560869384	270.6572153744316	245.09101038679734
205.61594030732192	238.18368441451628	277.59960941190104	249.9443840305837
212.32681347884906	241.26063260964386	280.78771322535357	252.09541271858194
215.10640306021511	263.5654171955424	283.61735263194026	257.8187549626979
217.31038402284614	269.52501761075314	287.73352342869083	262.94781957630164
213.44060820477648	287.5574771225249	295.47307506483014	261.56270385261865
206.85153783976392	292.55372846622777	299.88306341431064	260.3383535457576
196.74965474356327	316.68210824814355	311.26994161857806	256.1660339225957
163.28105788759754	316.0421725309535	324.6543776133888	257.44590535697586
150.13220403564526	333.499883144004	332.6487940064013	259.1370667526589
113.83130741732873	340.65803983936235	340.1403018631912	254.1222227019199
71.0577033980804	348.44171000725635	351.0161250500455	247.88880547258714
1.7102770775725276	356.2917129072225	367.5557970629685	241.58535202866204
4.716582563714496	363.8465568797833	361.54318609068457	236.01701937446654
-0.04962510575890633	367.4820329841169	352.3589087945551	228.7460671657992
3.073586959238895	367.2187213132683	346.1124846645595	229.27269050749646
21.724468655543063	369.93462726185066	353.8825128784325	223.84087861033169
73.7954244674485	371.9591968247779	358.2230190370492	219.7917394844772
77.33656785572623	365.96578025104014	387.2891168762234	213.704380324088
51.032074370903274	343.3798929384236	411.8023515334013	202.6846503243849
46.06754177325945	343.3483301292895	431.2672590602956	183.67609127943985
230.562296148494	306.78228995641985	432.227265638331	171.43520654937043
272.31489610384006	280.6427562399002	413.69650002235585	168.02190172979522
221.30541683311128	345.7250003334964	381.4002202368806	172.1726518695357
239.69671133437325	345.2747954784392	344.6176312343567	173.07306157965004
275.63636457101023	328.03481656542954	329.01785804430267	159.31341944862376
297.5509870646716	333.99041805335986	323.0549780787701	147.40221647276312
327.99630611758755	333.38203197160163	313.11404933853163	141.34045872690913
382.42065726258727	268.41129892926847	323.737839158372	151.8094327017356
415.1938947176887	263.4438959528717	295.01915221460547	161.74423865452908
422.444765448107	235.12487459916156	273.40124760650946	168.56913933113432
391.0613102971767	236.45770264538697	280.87981711113696	165.90348323868352
385.8990948489485	237.9483523312942	291.2042480075934	155.94471415734347
369.31168992305453	243.5374755307551	310.45764092967886	144.7664677584216
344.9819140482536	243.98005547432663	330.9205211979171	136.8321400009376
284.7732483715843	269.548967465704	343.2492449640953	128.92975905304712
390.04860951086164	451.7686770500534	299.26142870529156	148.3092102776872
311.94383171340144	277.59004466380975	316.52270713222686	135.40095441341322
322.7921908956475	300.38514249889016	322.7161908237413	124.67351131326048
321.787620187667	283.3727773290341	324.72533223970225	117.47362630521788
333.32600076381397	269.52710431002583	328.7279769427704	118.08556648787227
346.500726054597	317.00031897767576	302.3785263612043	139.3878675234444
370.88637788657246	280.72229402637447	301.4700654786001	143.568427738409
353.909095498664	252.87836397993647	307.83537140253395	150.97508484048967
330.1740427050559	312.0975272874588	291.2343722416688	153.55995608293205
319.9894113626174	236.4730370875491	318.52387677465344	152.56361582438382
286.26897499827425	221.70505082170814	327.54313042598267	152.8887788173872
207.93811443986922	274.70604602979944	327.9686210309572	158.48409590965855
170.96493235461884	306.11381273615103	296.30546530958054	186.19100811856458
160.7033733537843	214.9341124817184	286.6336279756282	194.92941544760689
139.22247491000945	259.88797756511383	269.20170324587514	203.16148290893287
140.74083083446084	229.52106128274963	273.5855843528067	197.10997887115224
141.56797320838473	219.03207950345143	271.9312996049589	195.92385579240124
164.4356047998726	220.6558731701148	292.28708796082634	185.33281828809191
213.44191021084166	215.47349635370594	291.4400919131551	180.7490158017917
278.9933319836729	105.72699238336071	241.56997046128998	215.6222008020336
277.48160278674845	165.73861042656338	237.39645165511715	203.5536227159543
386.95426669165084	117.09384102623818	247.43748773320706	203.6974313823464
384.6141825919433	145.75665387262114	252.11765593262209	210.2370106802076
404.7680016522373	166.25259292822142	255.4522436306762	212.8873583876491
340.46215201658885	163.20915193619442	236.70778849781107	218.97424037170308
478.4267437186961	331.0583286212181	240.5933206134759	227.66322917996888
325.9636416046489	156.29709773538582	257.95629997323	223.26172188290684
440.7806293071815	80.35288639572073	225.22840975381845	261.5504800320522
468.95084215560854	148.8724440257282	237.83223467700137	231.75797684765018
439.211749349294	154.91470410655268	238.15068612509873	241.85835699770064
436.20393414808797	116.19274954479266	244.16631652751076	251.2699957357886
