# Supplementary material
Source: ML conference proceedings conference paper supplement (https://proceedings.neurips.cc/paper_files/paper/2022/hash/1c8c87c36dc1e49e63555f95fa56b153-Abstract.html)
Supplement: Supplementary file 1 [file 1c8c87c36dc1e49e63555f95fa56b153-Supplemental-Conference.zip › GOT-10k-Results/VLT_SCAR/GOT-10k_Test_000016/GOT-10k_Test_000016_time.txt]

0.019230
0.021467
0.021686
0.022440
0.022048
0.021851
0.022262
0.022840
0.022926
0.022721
0.022927
0.022806
0.023096
0.021293
0.023135
0.023548
0.024016
0.023349
0.022818
0.022819
0.023313
0.021920
0.020856
0.020976
0.021483
0.022410
0.024638
0.021940
0.022856
0.021329
0.023143
0.022839
0.022801
0.021878
0.020148
0.019964
0.019287
0.019400
0.019207
0.019028
0.019052
0.019028
0.019306
0.019476
0.019627
0.019453
0.019542
0.018800
0.019074
0.019515
0.019308
0.019218
0.019311
0.019602
0.019844
0.019892
0.019867
0.019616
0.020484
0.020087
0.019997
0.019761
0.019741
0.019677
0.019744
0.019758
0.020401
0.020458
0.020327
0.019634
