# Supplementary material
Source: ML conference proceedings conference paper supplement (https://proceedings.neurips.cc/paper_files/paper/2022/hash/1c8c87c36dc1e49e63555f95fa56b153-Abstract.html)
Supplement: Supplementary file 1 [file 1c8c87c36dc1e49e63555f95fa56b153-Supplemental-Conference.zip › GOT-10k-Results/VLT_SCAR/GOT-10k_Test_000017/GOT-10k_Test_000017_001.txt]

438.5	443.5	98.0	195.0
440.7732842670458	442.4444881191997	101.55447215683394	187.00998307067488
449.25850134061767	444.64697322673965	111.54941498542533	178.11078335963936
452.43390033644346	448.9367795229376	114.261355399977	174.06253997034497
468.73394220458647	453.6470243779747	122.30573735385583	164.64205026027082
483.9147676810617	455.64187373901433	123.48993742903443	156.14580139131598
483.3488491928873	462.93339857499603	129.01797342598164	145.95895073995112
479.22364576922985	487.21537339258003	158.90983139164717	127.69303267047405
468.2945262058777	494.14544430002445	194.28826885879786	109.3261580754365
476.3668630553676	499.65361209043834	230.22085359366295	98.30982249460871
493.5031884536405	472.81382204310705	226.35847082714514	116.51075655423853
502.23004564688233	453.48024626713675	214.23454449553446	139.18854394156
486.85632214975874	440.5138991123097	206.24216916666586	148.5184572555932
484.39691912691944	439.2460157384909	216.72923720806642	151.0542240032307
504.6658044998138	432.56344344761106	222.34133497727794	158.65063502061534
518.5269069235643	431.37961211417894	230.49239640731662	161.01829768747962
527.2367196723511	431.30035983980287	225.35518398778916	161.17680223623174
533.5385078676155	432.6355399644119	224.8838182986402	164.57254733770358
531.4589616461346	456.3862928514077	229.04291074160182	153.75958965254284
541.1692601778824	457.51685550383604	221.62065442765274	145.499293972913
601.9909950437561	426.46797103310746	191.9813856884585	161.59496241809353
613.8999321059356	425.4010149466326	173.72650007373207	169.29186310067587
631.5424475291369	429.5638937851679	170.8519759900139	166.3678565507193
637.6561466276441	432.3442033352863	163.93500896013222	166.11766861761555
639.6768131039391	461.97429504801914	175.48663065230636	143.2410460299322
658.7100149237662	458.8054165584866	192.56221032769713	139.55298786080718
678.602761408704	454.3621378011282	204.91150512243001	148.43954537552403
742.9012936845324	465.3054284155704	203.8905824222212	148.74011925123935
773.6944406914708	463.8986438034481	175.5216940078379	151.5536884754839
779.1672960667627	464.91630851494153	164.5759832572542	149.51835905249703
807.9435218502217	462.2472217301602	146.58310295118912	154.85653262205972
829.4360450784914	458.28907057172313	132.07785962205207	162.7728349389339
836.6195680950431	462.9166394232896	140.89593107138765	153.5176972358009
848.3443465969032	456.3621391534367	140.6232230665405	152.7205883761829
851.8064486722403	455.5411332579814	138.3176243266155	154.36260016709343
870.2838099502605	452.57014370808133	129.00733521481345	155.69717369285405
880.4945580039877	452.4289845945271	126.5002693156668	160.45809947203938
880.6025848841105	452.9829334814833	135.3064397870756	159.3502016981269
874.907227576686	456.84677300649525	146.69715440192448	156.258920997931
1016.9559438935581	435.3277633696471	129.74031390850482	165.90436625408694
953.1498500241022	448.92514576659426	113.29223001986284	175.88644575117408
952.6710432213989	447.51667965920245	109.72259823908092	178.70337796595769
954.6313297601004	446.78538166434817	105.80202516167817	180.1659739556663
945.1321873140147	475.288482387091	120.3351058248942	158.8814063418219
934.8468895560632	469.79471265503173	132.132455816217	139.1625864699093
901.2255664426534	473.34160009459515	143.83904683769697	132.0688115907824
890.0663678128514	456.3272708515701	135.7493243282541	144.37738452751316
878.6674707440534	446.1251965048274	127.67067094250126	155.95969107147033
842.4634393195086	437.36257055265725	128.70173788771467	160.10175624383388
822.7266284465807	426.32210595760074	136.38583142871911	159.47587957333872
809.3718206491498	435.3934275920687	121.19422894318356	173.92307258915602
786.7204985923222	430.53505120727345	120.20753377917708	183.63982535874646
762.6545117028777	429.50775274690807	115.99206128338903	185.6944222794773
742.3734453514945	430.35744437286	137.67755162480555	174.55671784689855
677.1951854120072	431.35273846619265	130.59626917018528	172.5661296602333
692.3730663184107	440.9685185534137	119.29154592813575	181.91112734192757
622.6229108975265	427.63588168682827	112.54462679036419	180.27048559518738
654.4180137611278	434.0929786798559	117.659254934601	167.3562916091322
652.3332396871555	453.6893738195744	121.82880308254569	159.46290402310171
617.699883425072	429.2402477231325	111.53789197049454	168.58234439787662
595.7819959123162	426.5265644286004	107.10109948438894	165.2328805302831
582.0956861648627	427.28841107681717	100.35989811269539	163.7091872338495
567.8982830527192	425.5535661084404	95.72635251691051	167.17887717060304
551.6718546677365	426.3286712672659	95.36453300305377	165.628666852952
535.974615826025	428.2861681301302	94.17723530570004	161.71367312722353
518.270326105766	429.6005345849023	97.62952631455293	159.0849402176793
501.1915237073601	429.6675732416754	91.65030599191043	158.95086290413303
488.7535157141775	429.7986146215942	89.15118029753812	158.68878014429544
488.6901981022076	428.41429954844784	85.4134213322262	161.45741029058826
476.3288830822398	427.36945339775326	83.24665195956119	171.2297881384346
477.3090925328519	424.70130841831076	77.3390650501619	180.51324610549472
473.7640118956709	422.6628383221156	72.49351411706037	184.59018629788514
469.13905399975783	423.92527674315795	69.88990514540032	182.06530945580045
385.90476015821685	455.28757194739535	93.23371810566256	150.286616284692
390.99240422352005	457.89732053752607	105.90980705848082	145.06711910443056
385.72527761776973	456.26141271394613	112.50371227914049	144.3985867607494
379.9444563187617	438.30792500737516	124.0653548771565	152.04024060590626
375.2906439452428	431.95821771830595	124.68790662796889	160.39711868593193
375.69009121151464	434.71877788865845	123.88901209542522	163.83742724013973
377.7746766464902	432.41194209867604	115.19964769802465	168.45109882010453
