# Supplementary material
Source: ML conference proceedings conference paper supplement (https://proceedings.neurips.cc/paper_files/paper/2022/hash/1c8c87c36dc1e49e63555f95fa56b153-Abstract.html)
Supplement: Supplementary file 1 [file 1c8c87c36dc1e49e63555f95fa56b153-Supplemental-Conference.zip › GOT-10k-Results/VLT_SCAR/GOT-10k_Test_000018/GOT-10k_Test_000018_001.txt]

684.5	369.5	166.0	209.0
685.7731876647149	374.7426037120433	162.45362467057015	203.41059036084988
698.4847376557418	401.42180329099597	160.0409590413327	184.5678427321688
707.10030858753	410.4833363955983	153.65676287192758	171.86824937004982
724.2753848078269	416.75244072488636	155.1772155546686	159.33004071147377
728.4519477347154	414.3088770788169	156.7296141681599	164.21716800361264
743.7889191345266	355.911461048011	151.32535217504017	205.2029576457164
745.4096618386429	322.7367960139377	153.68243563460172	237.9608745070985
744.4688169473177	312.93947537067174	155.5641254172521	251.42370938752262
735.0229927651577	318.5277905789791	168.09111703261016	252.97639246883193
726.9929046456405	373.1730300452619	184.15129327164465	216.2552500787482
727.5204572003905	412.65446525561066	195.69727976765967	187.6967460801112
729.3308014078522	363.79426391764804	192.07659135273636	194.85656066922763
734.3841114393059	302.50015806733177	175.87657514204108	226.043830153042
764.1390075455803	252.93959986526102	211.12353428288117	217.77396169000963
730.3700033211458	247.84657148026062	217.87474822322122	221.20593018128505
561.9624896611124	348.9546199618607	195.13023217931243	226.42803131268613
543.6730980150194	334.95851262386884	205.17246696169735	207.9812860965177
711.7111081010629	328.82227528898085	200.91880380465903	226.76008149207897
592.3686699829245	283.50982785506676	217.44681344104083	229.8686349720697
620.2218623971415	279.1833189352578	218.08969822302075	245.5653115129894
585.7909157775747	303.6777117715299	221.2655600633049	247.6656613728837
652.0274218346317	292.4778048545725	199.51980755969248	270.0654752067985
588.058280877937	274.1597144485458	216.8458095204803	262.4567440378114
665.2880367766409	276.21353392529136	213.17675381289303	265.8886278888113
665.1658112010774	274.88869194807353	205.88829406501176	268.5383118432471
657.6220432202206	274.6874848401296	213.52084850360887	268.9407260591349
518.5093650086862	317.84688897491105	233.8467470306065	243.30414317688286
504.29183331661045	312.17619377001824	239.7403556930862	254.64553358666842
488.01110920841796	303.7732061980964	225.5934844483403	263.66678882032363
435.21850800993593	279.1621714178787	254.18816968431292	251.2964446519659
400.8501084576671	268.3927358011169	275.1628384112572	240.9938956337605
384.4613447198725	271.87035204023675	283.56836995937624	234.03866315552074
346.36190322988466	305.1764906910314	294.631598413672	224.42008356390144
326.0597222545242	341.01562824697646	343.3912854431239	209.8290840031284
306.97397476391745	346.19125497770347	381.5627804243375	199.47783054167434
309.0352463290965	345.64320854031627	386.4774597246359	209.61114584710523
361.98835966112034	323.68627258330724	345.55463907946057	244.24167404414152
352.25234678401887	275.94427907818306	365.02666483366346	247.18756782746487
300.78223768158534	239.7962325501867	400.79196994449705	233.115915476843
294.09025652039145	163.29151501560585	414.17593226688484	237.69872235473892
313.42132750540236	144.29722995901662	375.51379029686296	255.34477282412178
324.938843050869	120.79405073251223	372.25799533581005	262.79265901736994
340.0740484233398	122.56304442109578	401.7690952876702	259.25467164020284
349.4236358476803	146.47019064747823	424.4665719174045	242.48786779624942
350.77518921213465	195.04952051848977	442.5735020765193	228.56935560632033
364.0124668493087	236.87308206340418	436.96691978357836	228.39412444211976
355.6412436199712	274.7891980940833	391.6176359338744	245.6994878433299
374.7016450168845	385.30784247539447	393.37886339649685	204.13133523472845
386.19365937362886	394.6892746302657	407.55830885082423	185.368470924986
481.9308600662098	307.942626056484	353.66486039425035	221.28081514396123
472.8177470740336	288.9000280724846	389.8792031209937	223.38977762717832
480.3010366026868	242.72559819384165	422.7545865349508	220.05471244193728
496.4430356233474	194.5554440053221	400.4669544414327	236.42409323655147
536.8169980528171	169.50958747099537	359.5040650318448	256.6770297181913
577.8628526797039	164.88315691402263	393.44997521117693	246.59028759328584
650.8401337036703	212.62265883190682	397.68772513358215	221.2010293436752
671.6522257692143	245.32469626308705	413.94373879957345	204.03045264554737
693.6004242663373	263.66874032045763	370.0473418053275	234.4757887638366
782.6655479352974	284.40515572075975	333.8172517211227	268.6830418318806
793.5280416000851	355.6941243742323	302.6179420198682	268.21994010012287
841.73634904354	329.8795271953647	287.0707527988486	256.9506922732767
886.7701208070438	282.57291807671777	265.51507740528064	283.05204237713104
814.6594249021019	250.77490222337696	280.170240212843	286.18383388272946
697.6753449318251	194.8880994473646	309.0051698222725	255.25606181310263
658.9685385359346	157.07031661898426	315.4114277091097	251.0083532018014
678.8214067817466	110.90422304068903	284.61126121953237	272.0959803420159
785.4287203471255	108.18976772851732	273.02588818813183	277.5248909663593
770.7330555876977	122.69761632849469	267.7371431555374	283.1892683178546
763.5829357123579	140.8526377555196	264.6870763057071	272.90468536456945
737.0823224037366	212.6701257838089	258.4279498873575	264.7219448179157
741.6784737376997	256.2006492701215	249.23564721943123	284.7605132864501
708.7974753552832	305.37497053867367	247.75976545008933	270.4592189170646
693.8833535047089	390.0714428703809	261.2700664127546	231.609816161516
718.6403721478985	377.15323222302084	258.3062706042895	226.41274313762676
739.4668297923765	299.64644620981596	216.65335531533333	266.9877419629656
627.8775591574722	257.3527389602399	242.07391412538627	237.4840127353355
731.3300613411877	225.92448347038803	216.4170743651598	239.92446884597092
709.1698810559235	179.43791317720428	196.08056301736605	253.87254375438897
710.9204242334267	158.85333518781516	199.65072544695187	259.6854558102069
707.634693793156	155.54050541885613	184.5676513936056	266.311115348125
714.8268860050416	183.69403946373174	177.25448671133432	259.5025854488744
685.6448702472826	249.17820818416558	208.22849060137403	231.24685160355028
664.8077201327596	280.4155658217836	208.39180382017435	224.12011900864178
710.5222309334672	338.95169381584964	212.30397757824093	236.43948529409192
654.1214947949737	384.49583702598954	226.205664660695	201.86536184211644
658.114581372731	350.2097975898798	191.26528731501813	216.52903233401133
618.6787999307437	319.271344382806	173.85370932451303	233.47380634006853
538.7422366022716	298.29394739444905	186.5865147008567	224.24935813222578
478.36196292977525	295.9285458557394	165.15982887182741	228.98016120964508
