# Supplementary material
Source: ML conference proceedings conference paper supplement (https://proceedings.neurips.cc/paper_files/paper/2022/hash/1c8c87c36dc1e49e63555f95fa56b153-Abstract.html)
Supplement: Supplementary file 1 [file 1c8c87c36dc1e49e63555f95fa56b153-Supplemental-Conference.zip › GOT-10k-Results/VLT_SCAR/GOT-10k_Test_000019/GOT-10k_Test_000019_001.txt]

697.5	382.5	246.0	175.0
659.1762957349503	394.1981744315856	262.1906311517658	150.6036511368289
691.950315456262	413.87117107495436	254.61199765993348	124.1397480613782
728.1793690620259	422.5012111548786	223.28206743393832	118.63057561168193
713.3596377921259	420.6510961070019	205.03231767643177	117.00978211884575
727.1200267824807	416.6790485419185	172.4875937542701	124.95387724901249
720.3235484917461	398.1228553467728	153.39656777790793	129.38228108147248
712.920307473672	412.32171003925737	137.05869228842084	132.1289292221387
701.9378783647886	449.66942718430977	129.35056857035758	116.77945880369384
706.5625234596839	454.84888661111245	120.10127838056704	106.42053995008843
692.838183156232	450.635452447635	133.28737542189742	100.58482471147028
681.5804166026151	428.55509629440223	137.43283792464655	111.67940992986271
667.8214923262062	395.8236505231367	161.03290342317825	118.37555565810183
644.0119050688735	392.913765858425	173.5537212205259	119.80803039786036
584.2378778945051	373.4153382657263	155.08838622015128	149.6039929599837
538.2143494383482	397.16789256793487	165.56755862171062	145.2818820377307
513.7703583186563	399.0575338769348	170.42159957079795	146.39525956309708
504.87063178714754	407.9384004612238	153.3214759056566	153.56179548606121
538.0905297656367	405.15478110253383	125.54413637293082	163.96184125647264
560.5047378501527	409.0122442933123	112.55943858005456	169.8942227504111
559.6797954087968	410.04330762680206	127.48468295553104	163.40697625250988
568.1713801387109	410.5437828380951	142.50712547100105	148.68933498336753
597.5028568963794	441.15004155142174	180.1399377347464	124.16091880588857
639.3730817759867	447.9709374323218	191.83598834337107	110.51912704408838
624.6317573359413	429.77856686655684	216.60038643925586	109.15786190196835
633.4240038472486	424.3352675814964	234.43458045264134	114.98464803837484
641.6115488634334	426.42299324659894	261.4329840776842	110.80919670816981
645.5772759710852	429.342401068314	287.9466363574356	104.97038106473966
650.7522712111522	445.87374764112997	277.5966458773016	95.97807513085286
659.9560254319026	447.41974320970655	270.60235400355333	92.88608399369963
698.4448383085754	422.70705706591303	226.9280386611901	103.45759413514054
709.2249095365775	414.9477803554308	200.25661235808303	113.86486370900204
699.289709947328	425.789523836193	180.92861179641352	126.47997652012515
686.4498934352349	431.7400041528982	168.03177702909983	114.57901588671459
680.461221120517	448.21331295426955	144.56418263244638	117.07733731006128
669.1639921390655	448.97163233748154	130.12678484879044	115.56069854363724
644.9163696402201	425.7888075860565	120.61112146925197	107.7828335610732
649.6725717175228	415.37449252939666	136.2660731579811	103.44410783105833
607.4136081854306	405.08360378932645	130.39744573186726	112.72756599991146
567.8224652481588	420.44311858422753	129.22928956165873	112.61822861763395
498.1031226211973	437.58343193809606	154.47670152883202	108.78860811969685
493.2820614933896	440.0973603256059	159.98855093978665	120.28184272332032
493.83772995967894	421.527468875246	176.48769205364798	122.20066953116014
490.088218849958	394.63579332523216	183.98671427308983	138.50969471145982
416.7802066000726	402.17905012993185	214.0837285277559	133.55526894946087
362.70368680615013	397.89108561210423	235.23219900059775	136.69341241542836
342.7642937498235	393.0638723895	222.86169314966787	146.34783886063687
344.03595677096655	410.2403914790492	237.66744368368978	140.9099283087187
331.66545087580823	418.17991745098277	226.93064782413495	136.85681224814212
330.534830189089	421.6079498032793	234.8767539001489	130.00074754354898
312.6117507826139	400.4962523196043	230.91773741867647	132.4189672164764
305.67567194918803	401.8435477321525	244.7898950855282	129.72437639137996
279.5605028055559	411.52723791962626	279.53666773707005	116.18485122834
270.15299454912264	414.07865123025607	286.156379108146	117.17967717797566
273.07088444664134	438.2137488801921	286.53142993195837	112.38529621005173
280.57904763772643	438.5837373974696	271.51510354978814	111.64531917549675
279.9237138778601	414.0348642617793	231.5169889946672	119.4342833720236
292.6610758716529	400.54397468984877	206.04226500708165	119.13669861379161
252.22431211501203	418.00852869946544	236.16576928216975	99.43259756601627
221.039428045505	416.5364624058178	246.79366130597492	102.3767301533116
211.50473975005215	433.979248573343	222.82398881486785	105.15032576502233
226.45491120355416	431.1223297131003	192.92364590786386	110.86416348550767
218.15453016454703	411.1006550477034	166.86238007151206	122.46616087339072
198.0047391249869	403.28374703012304	148.10393806988833	133.5570519792635
153.10643820653308	414.52418879477557	135.91561985191365	124.37854932668225
127.04233793577876	414.7736717750383	122.47399580312621	123.87958336615682
80.21090421750473	431.16830721576866	123.02722794865664	110.48815317032467
47.2726267454848	451.7845879393159	130.08647212398634	94.988165184541
40.357314158994726	445.5594731557186	140.38340537097343	100.37101089974956
20.985871087059763	431.1514807979777	152.67822575667049	110.29552007367928
10.728073375348416	425.9745010131544	156.68241846154547	120.64947964332586
2.5504788321400866	438.55210953554354	159.96298995872928	121.64349777701331
-5.367969205418774	451.0311789919807	153.67752832048586	118.80771657750009
11.000506864619112	456.95160402594126	176.6106478625599	111.24917971589818
51.93919227911368	439.3120904689796	189.31552054979716	115.00079232441276
44.15092997519436	436.09312105990097	204.8920451576358	116.68220647688231
29.7665522182767	456.86839212663824	248.70971382165993	105.22949064378543
15.432634826448151	457.49692223927855	271.91940000338354	103.9724304185048
18.111393850390783	465.48355035800375	266.5618819554983	105.30903401967973
29.939558281110465	462.6002300461529	248.62248672385022	105.3587410135901
