# Supplementary material
Source: ML conference proceedings conference paper supplement (https://proceedings.neurips.cc/paper_files/paper/2022/hash/1c8c87c36dc1e49e63555f95fa56b153-Abstract.html)
Supplement: Supplementary file 1 [file 1c8c87c36dc1e49e63555f95fa56b153-Supplemental-Conference.zip › GOT-10k-Results/VLT_SCAR/GOT-10k_Test_000020/GOT-10k_Test_000020_001.txt]

584.5	460.5	64.0	177.0
581.3991001517826	460.63644484968637	69.20179969643475	175.72711030062726
581.0603017818981	455.64390314717605	69.87939643620363	174.41766704118396
582.661831951814	458.64617408499697	66.67633609637204	175.92934188432324
582.7754873058584	459.4264989366149	66.44902538828322	178.09114377049232
583.4757080074141	450.9409856318766	65.04858398517163	172.56606173354962
584.390768755458	452.0703763325391	63.218462489084075	173.95221717654613
586.1609161733813	453.7230353440838	63.30993960997242	170.6468991534567
586.4788458297122	453.6583859720144	62.674080297310624	170.77619789759555
585.5314559384442	453.60600865637093	64.56886007984679	170.88095252888252
589.6245854561087	454.65089485176435	63.606884053629024	172.40332164265135
593.2811312119037	455.1911693871149	63.52703679455481	171.32277257195025
604.4469600563727	458.7471207983079	66.39332783674857	171.41028367274484
604.0568710168122	457.7999625986343	67.17350591586964	173.30460007209206
606.0728696710751	458.5885473378988	66.83521156586016	171.7274305935631
611.3727830678808	459.326810446044	67.23032900495258	170.25090437727263
609.6735127659878	458.6777425508819	70.62886960873884	171.5490401675969
613.8188751114683	458.52711938859113	69.79838618260354	171.85028649217833
612.0170709640917	459.21200640205313	73.4019944773568	170.48051246525438
613.243984033064	459.36702019682986	74.71200115717272	170.17048487570094
614.7831160845368	458.95751930581207	75.41619495490426	170.9894866577365
613.2476296960243	458.9340502892869	78.4871677319293	171.03642469078687
617.735834074425	457.421749509046	77.23344217197221	174.06102625126866
622.7906619963821	457.1170183014949	74.89029745732633	174.6704886663709
624.2071511886483	456.53669904223216	75.90807712944014	175.83112718489633
626.3956131682935	456.213308014772	75.41668987699077	176.4779092398167
631.5223432091689	458.13677960802033	72.9356481446357	172.63096605331998
630.3498512029207	459.76003884159263	75.28063215713203	169.38444758617533
636.2199376312972	462.25381252711776	71.10260559918382	164.39690021512516
634.9838114485974	462.2649337507979	73.57485796458323	164.37465776776475
638.4563868736313	460.92171920011873	73.98650389042893	163.3826884811664
643.1723711343656	459.35357419410195	71.89698401659479	166.51897849319994
643.8066819103848	459.1116045102991	70.62836246455643	167.0029178608056
645.7723521553065	459.7877418146276	70.36149827395911	165.6506432521486
651.6976702346739	460.3776303700113	69.43147794918622	164.47086614138126
651.3757999907149	460.00556476179577	73.68190222652453	165.2149973578123
674.3063148043603	454.1265075124023	90.59292291814526	169.58816476025657
670.2081226331978	449.09406319037765	98.7893072604703	175.6032017265633
669.4132501270129	448.4904603447236	100.37905227284	176.8104074178714
673.5582872381747	447.4215635428022	96.41248124885959	178.94820102171423
678.0635431467724	447.7034595622159	91.68938276558606	178.3844089828867
681.9416360281352	446.31357325069933	88.13118760292488	176.96619100585545
682.6820232349382	446.29638357139095	86.65041318931887	177.00057036447214
683.2975964899324	445.8118619233172	85.41926667933046	177.9696136606196
683.2587127820134	445.0234583109153	85.49703409516867	179.54642088542352
683.0517420711794	445.0235810042086	85.9109755168365	179.54617549883685
682.6462313121976	444.6830799625347	86.72199703480005	180.22717758218468
682.0006380945251	444.45812145915403	88.0131834701451	180.67709458894603
689.2175668399409	444.64288690979674	86.08320684510716	180.30756368766063
688.9710781805732	444.02875341404314	86.57618416384265	181.53583067916782
687.7073280019803	444.07539354420464	89.10368452102848	181.44255041884486
691.1238612679273	445.03779676549084	90.66676475430407	179.5177439762724
691.5535536342629	444.88671613972616	94.00434253009387	179.81990522780177
692.2247454855935	444.9619918077153	96.92088113652599	179.6693538918234
690.5875663246668	445.47078451500556	100.19523945837943	178.65176847724302
690.3028839518364	446.02035892931224	100.76460420404024	177.55261964862967
689.524758328036	446.71752034451185	102.3208554516412	176.1582968182304
692.0273554614814	446.17680536982255	97.31566118475027	177.23972676760906
746.0490315818065	452.35467434126224	83.38087619390039	173.439313120166
699.7212624609932	448.83287726522167	80.47415685345226	176.50114653966054
698.3775783036735	447.6221906867359	75.21034354379341	178.9225196966321
697.9947350003224	447.4967412280028	75.97603015049569	179.17341861409827
698.9586189134496	446.1425976054561	74.04826232424122	181.88170585919175
699.0983148868085	446.5347137887697	73.76887037752373	181.0974734925645
700.213758063337	446.9334096496791	75.4616463178236	180.30008177074575
701.2113759501906	447.1714018046837	77.40865233022663	179.82409746073657
701.1146106034338	445.8006603681657	77.6021830237402	182.5655803337724
702.6864454479147	445.3264550378794	74.45851333477853	179.5010867551199
702.2691708688637	444.25688570698395	75.2930624928803	181.64022541691074
768.7730078877044	456.835322770025	92.71201556726264	172.3177330920986
767.7248318120772	459.03599816197436	94.80836771851689	172.04274221502698
772.57644983735	458.24271288914724	89.26327489004959	173.6293127606811
777.687983142553	460.04794125092315	83.1266056630337	170.01885603712938
786.6804320419733	458.3164215126489	80.85127461938765	169.55450382487913
785.1400717275972	456.53520629334577	83.93199524813994	173.1169342634854
785.3652719615491	455.11755735216383	83.48159478023597	171.96559491436335
785.1996506243336	453.78570375332606	83.81283745466712	174.62930211203894
786.2381818505386	455.1263207638769	81.73577500225699	171.94806809093723
788.3407360349801	456.0334044656881	81.4620303920811	170.13390068731485
787.8095605725925	455.7885734021844	82.524381316856	170.62356281432227
788.4317588761066	456.6879985012344	81.27998470982797	172.75047656558004
787.9920299713581	455.8235904193112	82.15944251932498	174.47929272942645
792.3200783506717	455.24256345946407	81.45463286256707	175.6413466491207
791.1034729251874	455.45207772935873	83.88784371353567	175.22231810933133
795.133876329385	455.3353333064961	83.86023600860527	175.4558069550566
794.595064921674	454.95401136424516	84.93785882402727	176.21845083955856
803.9920785797318	453.5617417379788	82.34145552963514	179.00299009209115
804.2834154096464	453.2843536084505	81.75878186980601	179.55776635114785
806.1056171675195	453.2166394896073	82.15690687420478	179.69319458883422
807.6450872126806	453.7725712729309	83.12944114349037	178.58133102218693
811.0899622246504	456.0493457899565	84.34433026746899	174.02778198813587
809.7421273270402	456.7509639749485	87.04000006268963	172.6245456181519
810.2572906445781	457.71118012027347	90.04296835336933	170.7041133275019
809.8400661339892	458.363077849859	90.87741737454702	169.4003178683309
811.3600129323081	458.11553871617843	91.88948456963908	169.89539613569193
810.3156122662689	457.7835538905548	93.97828590171751	170.55936578693928
811.9551269466607	460.4764767869395	94.82133209865398	169.29559555189
811.3686593756474	460.8811963877702	95.99426724068047	168.4861563502285
810.6708298839333	460.5583547240478	97.38992622410876	169.13183967767338
811.0450876788042	460.5659861858605	96.64141063436712	169.11657675404797
