# Supplementary material
Source: ML conference proceedings conference paper supplement (https://proceedings.neurips.cc/paper_files/paper/2022/hash/1c8c87c36dc1e49e63555f95fa56b153-Abstract.html)
Supplement: Supplementary file 1 [file 1c8c87c36dc1e49e63555f95fa56b153-Supplemental-Conference.zip › GOT-10k-Results/VLT_SCAR/GOT-10k_Test_000021/GOT-10k_Test_000021_001.txt]

939.5	196.5	289.0	123.0
737.5359476821333	171.04468538414812	304.2630463593977	122.0693101134958
607.7612096746748	147.4222984648345	314.57676948823837	123.40223473626682
469.7641324441013	140.9120351262088	328.06040919652577	129.69172257370138
405.0438954436094	138.6911146152494	337.8643930726779	134.13356359562016
316.24181217710145	162.40007141248572	348.5375583291129	137.52073734619393
298.7929937021121	187.2278122298403	353.5473968580828	140.1689029482502
296.7309018609197	217.4192495911864	357.67158054046763	140.51686583463442
302.41163552453474	244.17332693765246	353.96700444126196	140.60694973787278
307.1257774552353	271.861734328319	352.14393997985496	138.46667075649884
306.108265577815	274.90004777005953	346.6382333622091	139.93077424550427
307.217188663873	280.928971522317	336.9327421159834	142.84821688920871
315.2674456681419	283.55634562470493	320.83222810744564	144.9929082808033
346.04050712677815	274.4089942638483	309.71398819244683	141.67566114439927
324.5420587260934	308.5495994670707	275.88388959106186	143.2371738313677
357.9156626538625	284.351917644705	261.27402472385404	146.01236236131
367.0747315050987	286.2010916685777	242.95588702138156	135.96459064254395
404.364412056969	288.5301526344685	221.54388245307734	131.30646871076235
440.626956918873	295.5387513249286	204.12962973121807	122.80035503003695
489.30007172348587	319.55847030822895	188.51974666660243	115.62909033574135
532.6499969607723	341.67015979192166	173.148408715149	109.44758471401958
558.2295612618595	366.25762143632335	157.36507631646333	100.07043215414075
576.0986633263904	385.7733783027127	145.80041031426074	93.27030259050755
584.9062614814333	410.687380830345	131.92731719353918	84.60543261825018
590.193563033244	426.06132628315424	124.7422594403611	80.9739045161783
584.22434846666	433.18403741111507	114.13199891218339	76.39220640083337
575.0999309200682	433.5891920962796	108.49580139037536	72.59626795363046
553.3083324696188	413.69184632608665	103.83640175735079	69.8239625523191
542.4451908417711	403.3434499638072	98.34604478981943	66.02577907597396
524.5233559955539	394.21560222489296	95.54983086911929	63.67353662679716
516.4745578828313	394.3983781340415	94.18340152176773	63.307984808500166
496.4839844411191	392.6792316953747	97.1410196873972	66.74627768583372
474.7076492425382	391.51693103704423	102.1469628674854	69.07087900249459
448.2038160347381	387.16672304302284	109.53111082824117	75.08755861084066
424.013877975614	374.28749455675046	117.38513948950882	80.58309185489524
403.98920002319926	349.05269931705857	129.49747572051928	87.59509617500512
396.27432494340286	332.30786475496603	141.52440340481414	93.86218549680663
431.96353312229076	302.07153905786384	154.96604699375973	102.70523518431102
483.03118129090626	283.19588555321684	161.8269519592659	112.19826778178424
560.9530955801116	268.9871531015112	173.5906142196249	119.12759283407122
611.7619181440028	281.10391481949034	182.12684012633525	127.02228178317336
683.1298709075373	312.8167659151893	189.71354918953676	136.3333285870675
669.3713131097446	329.7410211751701	196.76120847742897	143.42373068249242
614.1053252300514	297.92827337620184	205.81882725830286	148.3009143455007
587.2873450070978	262.0378504007702	214.9886439521303	153.38254466824424
580.5554585772912	259.49206058729897	222.67161271451772	158.47412429518664
572.9464472475328	279.4264621935638	231.90866355314	160.4721238289188
570.9349585292123	302.0434998204998	235.9316409897811	164.46660863296043
571.0616399549012	294.43015229934394	235.67827813840324	167.13265378907357
550.1409480227727	270.93445719905554	245.91728030409553	163.56023327194694
549.0446758285051	264.5603612131131	248.10982469263078	163.4768749354623
537.6096961744361	221.63711756997822	251.63778819164455	165.50804704886002
534.4768093551663	194.67295994184514	251.36943683479967	167.1633623420502
533.6133203676784	172.3756303985649	253.09641480977564	165.8545899342221
557.393616267117	216.0546700751982	258.03017585738945	170.3616280623147
622.8085572299308	269.46255241515655	261.41864947079125	170.9205478136216
626.6548624490877	289.9870583285492	260.49713779949127	170.49812858891755
572.7137166245033	211.4653785836053	260.3757337946865	172.28617557621865
544.49848605118	161.21971188875798	262.58078367007454	171.1048628323037
537.2559601404487	161.47964178180274	270.27422821242664	170.58500304621418
564.1682264213291	188.00899525665795	271.6348788862982	172.71147933213638
565.3576968528978	215.47445457080156	276.21003097950484	180.3673973109432
506.2280086743837	208.65406555479908	280.06169501216357	186.85769332267506
457.5231666730068	203.10355648710913	289.67522987803864	190.64236569664843
484.0897325026224	192.66330429608308	296.73213639818323	196.47536053385656
