# Supplementary material
Source: ML conference proceedings conference paper supplement (https://proceedings.neurips.cc/paper_files/paper/2022/hash/1c8c87c36dc1e49e63555f95fa56b153-Abstract.html)
Supplement: Supplementary file 1 [file 1c8c87c36dc1e49e63555f95fa56b153-Supplemental-Conference.zip › GOT-10k-Results/VLT_SCAR/GOT-10k_Test_000022/GOT-10k_Test_000022_001.txt]

468.5	332.5	245.0	134.0
462.5496873489732	331.0870897657653	244.09230015099666	135.82582046846932
456.6689392133321	329.6778361238078	249.93187966529985	138.64432775238436
451.7706200770516	330.0249978863199	259.72851793786094	137.9500042273602
426.03025902415953	329.45996041585965	274.0763789172687	139.08007916828063
418.56656672363425	331.98990130912364	289.00376351831926	140.43918192331472
413.2041086289729	333.4465028064118	299.72867970764196	144.1869194128438
406.77702850322294	334.07359374342684	312.58283995914184	149.8154155481154
407.51945777309277	336.47054621418744	325.4343595688028	152.18969968129454
401.12387856514965	350.76338604813964	345.62242242390863	153.1916377702682
393.490064689119	351.8595217432108	360.8900501759699	158.70718831131254
379.01848276848864	362.3654407331438	381.80694100758524	161.77416936038247
355.84726668803194	358.29720638079124	402.99985381596184	169.9106380650877
340.15328761262083	368.58027080571367	425.554250113709	175.84519477446784
322.67513394165104	370.9359543102554	441.9815373852963	180.3983378005605
305.30785833426444	373.1030643959954	467.133695906874	185.64651032227619
297.22157530389245	369.863716335242	483.30626196761796	192.12520644378304
287.28591714214696	365.96949703747305	503.17757829110894	199.9136450393208
265.40117287814076	355.2665356408417	525.3235798188327	210.50782433243924
249.51207591977482	352.9142119448892	545.78211963845	215.21247172434425
238.007553142628	342.89346485072997	568.7911651927436	223.55588444332153
233.210457451622	332.7494822049998	590.5635547972777	231.6656515122599
234.40195666830584	331.5485515891019	613.4532560089779	234.06751274405562
228.97683017276313	323.4563652687749	637.3116887062915	237.24370567848135
215.36481683081638	320.0318800631612	664.535715390185	244.09267608970873
186.76339912826222	309.65313770009305	693.8968066496245	250.9292887430106
129.6094724715311	297.6137765025736	721.4173075069921	260.54345239536707
116.68333157248878	295.41204201779414	747.2695893050767	264.94692136492597
102.01766670421051	293.56099268890557	776.6009190416332	268.6490200227031
95.0174159624259	298.61200179553543	806.5687413916626	274.51432267590343
102.50678867770114	311.81455343241123	841.0942806108956	281.11207583534093
141.6492634730089	308.89920754611916	865.4911762413342	286.942767607925
148.9792951369388	306.85993555376405	885.9661595643425	291.02131159263524
154.5965985323046	312.4495406992183	910.5984979988482	297.7755739143454
156.4464721962766	310.17542073534423	925.3063060829976	302.3238138420935
146.02837588643246	307.8340171745761	946.1424987026859	307.00662096362976
127.46563814864726	307.3580254982219	964.1858104565345	307.95860431633815
122.30029136578332	295.43323380740753	974.5165040222623	312.4522433285058
108.73300864575606	293.70737828389645	982.0657707428416	315.903954375528
138.2090156730942	293.5621786013572	982.3817041887255	316.1943537406065
151.70589133293765	292.10299365376125	975.1537612271379	319.1127236357984
176.50213387548274	281.7496533667928	964.9946523211943	320.102716120162
182.67133378051142	280.8648388564707	952.6562525111369	321.87234514080615
182.71927021340287	272.90875013103096	933.1133073798562	318.3374503261879
190.89462338551522	275.6082111231798	916.7626010356315	312.93852834189016
201.26948165891105	266.3977377204601	896.0128844888399	312.5868308391918
224.21917058669203	251.32726447322688	868.5838516276592	305.78708734489555
247.80364980655554	245.2394785484676	839.3701496295616	300.00740275278457
296.81638558648484	241.60388996341413	811.0770799984354	289.84547944070846
309.97252713955214	236.1259598802038	784.7647968923008	283.9567612705145
316.34142398106223	246.27704038886236	755.6652335186861	280.0163699437917
327.41475445169004	248.66367928991818	733.5185725774305	275.24309214168005
340.86040502533217	252.42885544917806	706.6272714301463	267.7127398231603
355.1890604140196	263.80312357122705	677.9699606527714	259.91386359380607
370.14699095669675	273.67172211996603	648.0540995674171	254.57499569162633
385.3961074447043	307.6258779953171	617.555866591402	242.1581647034759
390.3454301570148	311.0696505528682	594.445032337906	235.27061958837373
395.1923149363496	321.1857313562358	571.9946136480198	227.79510711285513
400.48058835409677	331.55502663438114	549.1180046123438	219.35657875674622
411.2709912508868	335.6234213540434	527.5371988187637	211.21978931742174
422.3534584171344	340.2370755735129	505.3722644862686	201.99248087848258
440.52017018416683	332.82793122421697	479.91929551883516	195.04986044381178
461.1166274093473	329.19469753969446	459.50652088194573	191.92625790612104
469.49817174491795	326.7413668823775	442.7434322108045	186.79282517866636
483.5245180056732	325.13194444346937	424.39768912112356	180.30472062465316
500.7021498092231	327.5204506823551	408.69622401950556	175.52770814688165
501.18843047720065	329.9731479700379	398.7083346499071	170.62231357151595
505.90009721138773	327.00338139808065	389.28500118153295	167.777725481527
485.4243050752412	328.56861944427783	378.65152793371965	164.64724938913258
485.5801068665219	340.5958314110827	369.9516159145253	157.3694423287888
484.1721252316177	342.00628022484835	364.6337597404821	154.54854470125758
451.3052350779345	343.4209619654855	358.3044694847267	151.7191812199833
467.9094362065055	353.79321632891197	348.692340754911	146.70552151134797
495.5569882576286	324.78706202453407	346.8611641114045	143.616198738687
472.851974315793	296.11802181332575	339.3760770168474	140.5027191859856
506.4416529779447	284.8937113566424	331.34173133686755	133.37883427719044
507.43560891283147	278.71898575418095	322.2033134889506	131.4272735258265
536.6391947861154	272.1579715583117	312.6846111450491	130.58116780251743
574.6466243536837	283.6985670883057	304.9868353541367	127.99510174579676
605.7876295752653	292.5930816872991	296.10221227900183	123.5554193898171
657.3137607825433	304.12177673218645	290.0642423952979	119.90088780621281
637.262272187281	303.7969157347444	285.95816343917113	120.55060980109695
642.1331061882315	286.0215925333065	276.2164954372703	118.49430792232985
574.7436161318633	308.7519964897832	270.91186949526366	115.66764098255908
515.3421109667438	331.63336274544923	264.473398495118	111.65206891468861
514.9319781238282	325.790388520984	259.4939445236245	111.73857804897014
534.2732851942118	307.92453755251836	255.18681319335172	107.36555004032475
531.7682661435445	303.48434519385603	249.01768168791602	105.066765150879
537.2955876757794	293.92393449270634	243.4227548417348	102.34872168002337
541.3900654726493	290.34375817632747	240.56451240511063	104.17836115566541
536.2308726554156	289.41159848167365	240.23940232391567	100.72093268714187
546.4043294422542	289.4891919000968	235.66010171696257	100.56574585029556
552.9961775113446	307.75608031761635	232.8502926499823	100.34057376445892
572.5413411639007	330.0781866578088	229.75617592535383	96.83488746176948
583.4900716201971	352.70356692200136	222.96535722708313	96.90405357635113
590.4917577407283	381.384691167032	223.77762883444663	98.80438047999348
606.9324896399703	383.33636626108137	220.79903830573087	99.88484250352263
609.6706641991493	362.81252847934667	215.32268918737287	101.25586038958963
558.5027067333704	341.5987594367767	209.77243069744935	104.4520626851
545.4380833408816	329.1921268981187	201.75264970827976	104.87316506659644
