# Supplementary material
Source: ML conference proceedings conference paper supplement (https://proceedings.neurips.cc/paper_files/paper/2022/hash/1c8c87c36dc1e49e63555f95fa56b153-Abstract.html)
Supplement: Supplementary file 1 [file 1c8c87c36dc1e49e63555f95fa56b153-Supplemental-Conference.zip › GOT-10k-Results/VLT_SCAR/GOT-10k_Test_000023/GOT-10k_Test_000023_001.txt]

232.5	298.5	583.0	224.0
223.16458672501443	301.72241080555534	575.8902343828033	216.55517838888937
233.20303638598335	311.24266195577417	555.8133350608655	209.66915035683803
253.56365747012853	317.2648647189521	526.8347769295037	209.3674288674107
287.1194421215464	323.19301300426514	493.686333214117	208.83217415926757
342.9254925506371	324.12707727855565	457.9089630209752	206.96404561068653
393.26257961062976	324.5467095173852	418.92861443918684	206.12478113302745
456.2260895545443	316.0515818960512	370.5991377171724	203.71565058424187
511.7187166878271	285.46049957783487	331.200764088392	202.25929466261226
564.4594497294995	279.90773924057913	292.43425341861894	196.6860764837309
571.8361405426838	278.19625558509654	277.6808717922503	192.44334642377288
563.009733209359	276.30611903311024	295.33368645890005	188.8505731230693
550.1162857798478	278.5494982092478	321.1205813179224	184.3638147707942
535.9794772619342	284.041003192122	349.3941983537495	181.26802006273124
551.8206568959172	288.4988100610959	375.4713885745582	180.6037705374655
560.7938491383267	288.3205072436464	400.63308194471523	180.96037617236465
556.8290301789852	294.1015711388414	426.5509959858208	178.39238644318598
550.318610028995	305.20843793203017	448.89595864409364	174.8268975733923
542.0353188245994	310.9594193478224	465.4625410528847	172.90734648780767
511.6121978973025	316.35488320814284	477.38085171713396	171.9020050052356
496.8596796166057	322.4354106414876	487.0099285401573	169.6789300077313
462.99599578317117	327.66071757504886	484.4911715956749	169.2634767993733
469.5554152118232	328.80218190462114	481.3639966382177	166.9805481402287
476.26722256683036	330.4088168726895	477.8458988788873	163.76727820409207
478.2811864863759	331.10657037215014	473.81797103979625	162.37177120517077
479.7468837802039	331.256959367651	470.88657645214016	162.07099321416894
503.82368273608074	317.5370382713224	471.06645026896604	160.51075236967847
504.9171335446668	303.7739999737825	468.8795486517939	159.11439126950282
474.8310599690017	299.2440742835899	461.96249213716226	158.59007069760773
445.64677517663023	295.1547177089015	453.99882377826214	157.29274985503562
418.87316375134543	289.82766749627535	442.1741308530296	158.60800516945898
428.54614202277816	262.93427768594916	432.02206794088386	157.23142300579366
447.80382164771544	262.6570863467714	420.57811908075985	157.78580568414915
489.2248178332534	267.4376150234509	408.6955618645686	157.0946777251508
526.5165826310601	265.35050493390287	394.9213575054289	161.26889790424684
538.5557140943047	264.22411278873085	379.4065959810207	163.52168219459085
548.315760088919	267.64285365585533	359.886503991792	165.06356718198248
531.4836832781449	270.6508065370973	344.8105408648605	167.17101421091172
508.5823215995886	279.64439059436074	327.0896903317256	165.06473956894675
492.20555555741464	278.6495569398727	306.3300416290827	167.05440687792287
480.8700552953293	280.8688754242779	284.7584260057122	169.98953926703587
478.27221729617054	278.8456461796359	261.537549121704	174.0359977563199
486.4687692786604	280.2646888534606	245.14444515672432	178.02264821872717
519.3288896804362	280.3649465551699	245.8547800716276	177.82213281530863
512.3778956384207	277.0038584433596	266.40730591488386	177.8937712797038
494.99183761120605	255.44305861297528	294.21735303795094	179.2429573522993
455.74602356857247	248.94004419172938	320.90266179929154	184.84808343423012
438.3717970025872	243.62544035835276	347.7589138173205	187.58508998704187
422.0169524583356	234.97934208714548	380.4686029058236	188.2058015771671
424.2296512033643	235.51246519346645	411.3496785184117	187.13955536452517
422.7204687458745	229.38748182231325	442.1426620838139	190.1313158900241
437.03787189143793	228.49966507071457	472.0518831932815	191.90694939322142
432.39535139143345	222.25481357763488	501.77835522948	194.17593686128615
428.7981754390406	222.83357860441214	530.3505671357018	193.01840680773162
418.3733696251175	228.19787230478573	562.2778239575067	193.3674646009431
407.91276095637	227.39812819109454	583.1990412950017	194.96695282832545
402.6634344019734	232.4795229084815	605.5648709025868	196.67133989234355
393.62079544065125	235.86171677193266	623.6501488252311	202.12345101191897
370.3624301693778	270.05657273019006	632.4460615006254	209.17537482970963
315.1587455272835	287.85067768632047	640.2294458289398	212.07115927590166
279.5946705711443	294.8800568450659	646.3988058901102	211.00415892863234
267.8650898957277	293.70115532259837	643.7381069394783	213.3619619735674
271.89136517961737	293.6392144168515	635.6855563716989	213.48584378506126
280.5152505741015	287.3722934147569	618.4377855827306	213.06671288326226
302.08054088332665	288.10093323432153	588.0067822025519	211.6094332441329
341.4562570439734	283.6861949555415	545.9712568343815	208.20027415065192
371.51487995757384	284.1388988946951	497.4291075695607	207.29486627234468
400.9598811535081	288.83510338045915	438.53910517769225	208.76279364587262
428.0145123144405	294.7919790781026	384.4298428558275	206.8809271845841
455.4915872520297	296.58636206971585	338.6821317640588	203.29216120135771
462.01974331993426	300.45833181449547	325.6258196282497	195.54822171179842
454.5255551004779	303.81076575536525	340.6141960671624	188.84335383005885
440.05788929273035	302.65382121479706	369.5495276826575	191.1572429111952
428.7037733125928	300.6820896079145	400.9753460304829	195.10070612496028
450.3473103346225	299.9589126084999	431.65621828495284	196.5470601237896
460.16744773845903	303.7466523555084	460.60699674650954	198.68979128361855
468.40621896353423	303.74290911417035	484.83241490859746	198.69727776629463
465.3765315904162	304.7937371339224	501.417608409704	196.5956217267905
452.19198879389745	310.3563547540284	517.0595982605277	196.19748222879235
445.23654806585466	316.7057194979995	530.9704797166132	194.443323500514
436.7019413761074	318.46415369274877	536.927422382981	190.92645511101546
433.1209287351892	319.74773754217557	544.0894476648175	188.35928741216185
432.9130954241531	316.07344837556616	544.5051142868897	184.51850245808822
427.99137053572474	315.9294280206759	543.2232976509636	184.8065431678687
417.79135999418276	315.7578533727467	541.3987939909861	185.14969246372726
413.98851111250997	309.4575474093263	537.9119697557444	186.65778239198073
415.9380871528087	298.706357171723	534.012817675147	186.01960780406637
417.5449379033746	293.10618044156394	530.7991161740151	186.2169222666164
422.483031024487	293.49602750272743	520.9229299317903	185.43722814428946
429.2160465445782	292.68387341643074	507.4568988916079	187.06153631688278
428.54662251980983	292.9169329339538	487.51101237957636	186.5954172818367
398.4590662505749	287.0360146962011	464.9017272685064	188.00920405114962
381.1072676997916	268.3892355869683	429.26759092948555	185.10977173213666
360.5342219061652	267.09543907646224	404.03753642737104	187.69736475314878
372.76905294199395	264.9444916567035	370.4062355573916	191.99925959266625
360.7901453876012	268.74749075059196	333.1514071550526	193.1379247636214
379.7078364525298	276.2701440287981	287.1016562005568	194.52135585648628
385.5665686583071	281.66546642590026	275.3841917890022	191.2802120411173
364.5099686224763	285.46747614138076	302.8590973513469	190.99533986481484
327.33055111591295	289.2885950887164	338.5819551918024	191.08029740467765
