# Supplementary material
Source: ML conference proceedings conference paper supplement (https://proceedings.neurips.cc/paper_files/paper/2022/hash/1c8c87c36dc1e49e63555f95fa56b153-Abstract.html)
Supplement: Supplementary file 1 [file 1c8c87c36dc1e49e63555f95fa56b153-Supplemental-Conference.zip › GOT-10k-Results/VLT_SCAR/GOT-10k_Test_000024/GOT-10k_Test_000024_001.txt]

434.5	232.5	116.0	66.0
434.8386515285663	228.67091005807208	114.3226969428674	66.98023373422174
432.8583002155378	226.6553427062014	115.45267500767173	68.18064387671038
429.68963506853527	224.76407494497096	118.92219690105526	69.0953709985498
427.9975260791167	222.97927501173928	122.30641487989243	69.7301728661398
426.7667830165536	221.34748171022568	124.76790100501864	69.99803077499371
425.96286036602885	221.00426439686817	126.37574630606811	70.68446540170874
420.15853997473954	220.6405610782374	128.7678709808714	71.4118720389703
419.1593172576448	220.05380158465692	130.76631641506094	72.5853910261312
414.3519255498295	224.34769126356719	134.0421963791734	73.50596684558788
413.0597745611641	224.2355581651094	136.62649835650421	73.73023304250343
410.01013129192177	227.8363530181804	139.45030907184423	73.07959498265058
399.7828846913817	226.5104903048436	143.37542726807516	75.7313204093242
397.1645681983289	227.81310503742154	148.61206025418068	76.53523372032868
383.4051940761617	227.5554428633903	151.63143489297033	77.05055806839111
378.3702348983448	229.43833144730002	158.1482651872689	76.83786896190699
371.74748630652834	229.40189290414773	164.10423431496005	76.91074604821159
369.0746096015711	229.18159149492146	169.44998772487455	77.35134886666411
364.9419025562913	228.43427665333598	173.8970201659521	78.84597854983511
358.81636291342	226.1774362477912	182.2388953210368	83.35965936092464
353.49700662545814	227.60580576858342	188.76805606619246	84.61247215010823
346.42283181608934	226.1445439543361	194.4636687816673	87.5349957786029
344.118879488525	226.88796498129443	199.07157343679592	90.40853344287667
339.13892763333945	227.54297901376788	204.5537488149493	93.57623371014753
332.0273740713193	230.97217249018942	214.1639329333442	95.94369276859523
326.25679861295	238.0648030213344	225.70508385008281	96.14057181979936
326.09230458369575	238.12765319963614	230.99877178577648	96.01487146319587
331.8435682911003	237.27613856662515	234.6130818814494	97.71790072921783
327.9442267327747	236.11874365337889	242.41176499810052	100.03269055571033
323.76530562190516	238.54242998992262	250.7696072198397	100.46032678062699
315.2515582252783	238.8278020827808	262.39402959630513	99.8895825949106
294.453121611785	239.8364350745931	270.63142092017665	103.43223026180523
285.95289414141973	240.07527849048392	281.8901098269016	108.69630946402916
278.7319889899213	241.6092925066492	296.3319201298984	111.62616742986614
272.06622721012286	237.1365682966901	309.6634436894954	120.57161584978438
279.0049379546409	238.05740893464395	328.8346908492797	131.94940203340477
286.00989973760096	234.71822621307308	343.1803931680637	138.62776747654652
282.1574207390446	231.10902376386989	358.29995955048247	145.8461723749529
271.14155081390254	229.3455857037551	380.33169940076664	149.3730484951825
259.767550238464	226.02365455300338	403.07970055164367	156.01691079668592
222.97726926968014	222.5375395475662	442.3119889908041	162.98914080756026
222.00160742661743	226.30880212250977	462.81350834761037	164.72171349301362
212.36687106713177	238.00067058906927	482.0829810665817	170.13695412523876
255.28734962055992	235.76835757225248	486.0004494076897	174.6015801588723
295.89972336835643	241.97091819728126	475.5463876644966	172.30655687344336
351.95099114151105	245.98287576722822	452.71548537713375	174.20171209565453
363.25079494631876	247.6283658557537	449.3680041893691	180.53679512952897
433.31780254725106	259.83299168893745	435.2206156849941	185.20138039335137
478.5598136580755	258.62803692038966	421.2968874031152	197.1813266729182
518.8354416945739	270.4163474504694	417.37454726179544	192.76193459567793
377.7789860582019	252.39119215108957	406.71494094337936	200.47942091142215
380.5772727963662	249.68304067452192	401.1183674670508	196.4725076242221
386.50968407482833	255.43486147308562	407.79734173745965	175.69696761342811
366.2672264676671	259.78068738707145	412.26100610243066	158.00000307311865
343.3127759693997	263.73546482964235	431.9064626705267	158.84492966412301
346.00163572113684	262.71580381318086	426.5287431670525	169.9355560269963
379.7095665552606	285.9030437280637	423.3258011024709	187.7739958008966
405.10188309323286	283.6162627818941	419.75715694538746	192.34755769323596
460.36160991670044	284.7985153936213	451.3127612896051	189.98305246978146
464.31545395836037	286.5612030958968	492.841541432144	186.4576770652304
433.7586631666732	287.4790695879732	501.8448617996895	184.62194408107771
428.35341737842293	291.2108344001864	491.61940003264573	177.15841445665131
432.95021872202096	294.7022307221248	472.18906401740395	170.1756218127744
439.9835505367489	298.7587467400041	448.2899096260867	162.06258977701594
440.48573778063223	301.0849647895335	428.59775937164363	157.4101536779571
439.3055284480994	303.1583692763812	421.9801481460797	153.26334470426164
435.29694322819745	302.4511171076377	421.18893204964127	154.6778490417487
430.9917854342167	301.6501926235961	429.7992476376028	156.2796980098318
434.1054130620496	302.46284542651347	432.54678564617416	154.65439240399715
430.40105244836616	302.3709343943834	430.9708556516498	154.83821446825718
422.09040960927825	306.13349205112115	429.6612260958941	156.27855677174756
423.37996440579866	299.2375972345399	427.08211650285335	161.09754827669585
425.0808204813852	294.62447438957923	423.6804043516802	170.32379396661727
450.19582051036895	288.4927123071239	419.14640480635546	173.44811802899937
457.0186062061301	276.85513303889945	414.6302968764536	169.33488618058692
453.44723138129626	272.61337326214993	412.7818600203808	168.82721922834548
451.38439666372244	267.4959370723496	407.9520259695859	170.1065881220037
457.75920659007403	268.36646988212556	395.2024061168828	168.36552250245177
472.6981478599185	266.6110868720597	382.7115219180208	163.18278935217
479.8074498265449	262.80198234312434	368.49291798476804	162.37981483469713
485.7806016826646	259.6920158432368	356.5466142725286	160.39858782420765
490.84447893906656	256.7813862724745	346.4188597597247	158.22682766185534
494.9796552999557	255.2488803671894	338.1485070379464	153.48403581815552
498.0271725347285	253.52894517914967	332.05347256840076	149.31942791555844
502.5476118560247	251.16501810280903	323.0125939258084	146.6044095678213
505.2058714798708	249.04288414646444	317.69607467811625	143.58475104803807
513.2254869770735	250.21997739567666	315.92429294955144	141.23056454961363
519.3522873349609	248.83931981362937	310.73734985669716	136.92522209078783
520.9169166622416	249.74686960115935	307.60809120213577	135.11012251572785
516.0269243571573	250.63369168642754	303.7113649750277	133.33647834519147
513.4431177626338	252.0685856352606	302.1283439330188	130.46669044752537
510.1215925291996	252.54912850698656	302.0943120027025	129.50560470407345
511.012545311965	253.63120471772322	300.3124064371716	127.34145228260012
515.8433861960689	255.4581198874746	297.2462756023943	123.68762194309741
539.978228727835	256.9017057034963	294.3819643543	120.800450311054
540.7050040438231	257.55897546299457	292.92841372232374	119.48591079205741
541.5807573632985	258.63442411420294	291.17690708337295	117.33501348964073
545.3172097546309	259.41247423259296	289.9899477438575	115.77891325286069
546.6264298798703	263.77655577057305	287.37150749337854	113.2918402469574
548.85306621501	267.9592466894949	282.91823482309934	111.08543250315626
