# Supplementary material
Source: ML conference proceedings conference paper supplement (https://proceedings.neurips.cc/paper_files/paper/2022/hash/1c8c87c36dc1e49e63555f95fa56b153-Abstract.html)
Supplement: Supplementary file 1 [file 1c8c87c36dc1e49e63555f95fa56b153-Supplemental-Conference.zip › GOT-10k-Results/VLT_SCAR/GOT-10k_Test_000025/GOT-10k_Test_000025_001.txt]

106.5	536.5	465.0	71.0
119.91967912392133	537.0865569524817	460.71110020307054	76.67703891200779
119.80040392449706	554.5307708948643	476.75789680536957	81.30922653586866
117.96876105914856	552.2687449718503	472.20282214956205	85.83327838189678
115.71799946243854	554.3203299116622	468.45977431525586	89.97467952999898
115.471017456118	553.2260455221175	468.95373832789693	92.16324830908837
113.71506881384408	551.7946435043136	472.46563561244477	95.02605234469624
115.43575606683711	542.585160568509	477.4524989290774	96.58854257106802
129.21207496204002	536.1184843117871	484.0122219838477	100.99380487321756
137.70316417794066	533.5848905767691	484.4401679205421	106.06099234325362
142.16310576401997	532.2760616867891	484.3293191673307	108.67865012321356
146.44532876588877	532.094312253572	484.62277475328	109.04214898964796
151.49059643571508	536.9039882599973	474.5322394136274	108.29178912108932
159.43131468202	531.2837135687249	467.36433022247877	110.81881120217274
154.73133770773222	530.9835692791955	468.1026582860304	111.41909978123158
145.56665440726243	531.7931262418064	469.0651609317357	109.79998585600993
148.2505146191777	531.9636382602519	463.6974405079052	109.458961819119
153.073858720189	531.9185830998981	454.05075230588255	109.54907213982634
159.07158484882015	532.7395826558899	442.05530004862027	107.90707302784284
151.2459998106862	541.2867849038606	441.2034692379728	107.3156694188169
140.6508948168742	551.3812326251955	437.70878770259003	103.58336832481837
141.60436310534692	555.0653987339499	435.8018511256446	104.32316593404366
129.562606986711	554.596347308215	435.59870477354673	105.26126878551341
115.8783950518307	560.2192524305872	438.6353280901217	102.12605872516423
94.09761767336366	564.880462602423	441.73078026284196	100.89685889833561
90.39797833500063	568.4239917764628	441.01710450947064	101.92275498035309
90.02006926966828	577.547941998293	441.77292264013533	99.9201515422607
88.34916923781563	581.2747592627383	445.11472270384064	100.5613047975921
91.05209202633876	580.9563869195229	447.86269417648884	101.19804948402299
87.49030866256163	581.092352339975	454.9862609040431	100.92611864311858
92.51692844339686	579.2188832518879	453.2317846114373	104.67305681929302
91.21466413987741	579.7800334058459	455.8363132184762	103.55075651137695
94.10630440637868	585.9378378845131	450.0530326854737	99.59626401295
95.26960584846185	591.8372554431313	447.72642980130735	96.00167514780404
98.95665136851966	591.4307522563461	440.35233876119173	96.81468152137447
104.85727285137506	591.9815443702605	428.55109579548093	95.71309729354553
118.0431802045772	600.4379289694739	410.00840763548376	94.45858118793313
124.3821905508538	599.4788681213939	397.33038694293055	96.37670288409304
164.3582522788805	597.3693320953558	421.0480087130089	100.59577493616922
110.33244354285986	597.4705694884549	427.46888895881733	108.21104916737373
112.20087159845443	596.548255223674	431.78467759907716	110.05567769693539
92.8923689349607	595.2295072752455	429.66070188720846	112.69317359379238
87.8093683433267	594.2229533101092	439.82670307047647	114.70628152406488
56.65651595688681	592.0755142697459	452.0375351891243	119.0011596047917
81.20300061411362	591.2642752044034	454.5559559798997	120.62363773547669
86.087331833689	593.7339920633303	453.45520616234296	124.35211663921675
77.56774813637207	597.3980161907128	461.77183912985436	125.74660281157419
71.92622637444165	606.7630490257051	473.0548826537152	124.74828017920252
72.85257495939373	612.2810832781339	480.2080666735543	122.71809286408804
85.5911602962725	611.1779144009461	472.867000319074	124.92443061846362
90.49968933940181	607.109661593424	463.0499422328154	124.0543757468495
116.39699882968043	602.2548185670528	437.81146291026954	124.9120152469215
148.43599269068733	600.4181107753514	424.80792028627354	120.07302331398824
149.6035132482201	597.7341735013576	422.472879171208	117.20241330632405
153.76725735124973	595.2466853050493	414.14539096514875	114.02556745878833
157.66393618660925	589.037944153091	406.3520332944297	118.46815916275814
170.97429332828517	586.588134722315	395.62722171896655	115.41982667036586
177.22667516739634	583.9117381249845	390.86209948119557	113.03297842457545
177.72876448008003	587.5153430759765	397.48577369802297	105.82576852259149
175.13694051680056	586.9116654033849	410.2555954020371	107.03312386777475
164.59242728550026	585.4158347066277	415.767544977576	110.02478526128894
137.98023254197574	584.2565513475212	421.4569638531183	112.3433519795021
134.71012783772426	583.1252039828182	419.9509466756938	106.55982012298057
128.54787399364665	584.0367809879103	424.35965831135036	104.7366661127964
129.85642333112224	583.412302724357	421.74255963639916	105.98562263990307
128.7529354115324	581.9743503497424	423.94953547557884	108.8615273891323
139.34501048211177	577.476222103879	418.79646419293806	109.84224445160015
163.29248055541953	578.695013365575	418.6714207833531	107.40466192820814
165.00894027019325	580.4518250884116	415.23850135380565	103.89103848253495
170.28889143452284	581.0592236264271	420.27666190881746	102.67624140650402
186.20966564439652	581.7022362309799	411.9749183047645	101.39021619739825
189.22377922645848	582.576881298889	413.65242111379416	99.64092606157999
189.33320097148967	583.2354132103278	421.12950471656194	98.32386223870256
188.31907838971705	584.3050109228276	430.93321073400045	96.18466681370302
181.41462127578365	583.9532139872855	436.87064332372154	96.88826068478713
186.56254035837057	583.9764095395516	434.5427731851278	96.84186958025501
185.89677892510502	583.4750109301834	435.8742960516589	97.84466679899133
207.65045636719907	587.7851430123395	432.2292128690341	97.19685697499176
209.22464433923957	602.5016032010865	436.989897419632	91.49111808153472
212.0971140726223	600.8926946972551	439.1103048677625	94.70893508919742
215.52031087285425	605.3305934972184	448.1783051409961	93.79033442611961
220.00063188205922	604.625619124164	455.34943797574715	95.20028317222838
225.9334340468488	603.8465634841552	451.6770206622192	96.75839445224591
241.35995379475466	603.7196427770754	445.3404161038929	97.01223586640569
262.67857654942827	603.859562106918	435.05766246621005	96.73239720672035
266.4680219745569	603.2599347008472	435.41841421215634	97.93165201886197
267.19136677034663	602.7480866297651	441.9394810276523	98.95534816102625
275.7534857545495	602.8277038452069	440.97237609701756	98.79611373014258
308.2192431588577	605.3785713997277	448.59877574148504	93.69437862110118
328.6649967606885	602.6972572864547	448.0567080335777	90.98711894849617
