# Supplementary material
Source: ML conference proceedings conference paper supplement (https://proceedings.neurips.cc/paper_files/paper/2022/hash/1c8c87c36dc1e49e63555f95fa56b153-Abstract.html)
Supplement: Supplementary file 1 [file 1c8c87c36dc1e49e63555f95fa56b153-Supplemental-Conference.zip › GOT-10k-Results/VLT_SCAR/GOT-10k_Test_000026/GOT-10k_Test_000026_001.txt]

540.5	268.5	22.0	26.0
541.1703459172741	271.6191362873316	19.659308165451804	24.80371989565202
545.0010840377975	272.7348306347829	18.289124471600985	23.97039621123749
550.4518071002898	275.2436628758678	20.003660535344324	24.928723292149236
554.3598333679602	280.4091733591537	19.95947233960352	25.902232274086238
561.05375827245	283.37829868614205	17.382334072326273	26.450408545131022
569.087936304076	289.4278835480331	17.79181587373328	24.649887486760846
573.3399942157979	295.4385365159515	19.280523775237956	21.955217027542623
577.7017577582832	295.1023348384493	18.994518504426598	24.574740801199223
580.3397988687866	295.8032869175972	19.196210169781455	25.227001850289064
581.9587444225388	298.36462379482214	21.54203598649261	25.688045020054652
581.0404071428408	307.4073654771509	22.635646525147862	24.693034132436885
578.0074234123739	290.54425160086157	22.74035414942469	24.142017824239165
577.7258267937202	278.14156107113786	22.565324813367667	26.062499109383413
579.3327819424472	276.9437800877287	21.64730626730373	26.162169324811565
582.1571960267006	285.0083162945305	21.262935690446053	24.322338945683956
583.4967681370994	260.1693581650739	22.888635693158832	23.777072596976538
593.3018058768756	239.36259451926085	20.915194146883614	25.70817353872886
606.4069244747556	237.18228929911484	24.03518429960816	24.935994193036166
611.7461644052444	243.17136469167457	24.153043030253208	24.525349041798155
611.7333588482196	244.27769410054512	21.112321159538325	26.912189701203683
606.0740397759918	256.65178878466014	20.352376522038018	31.6055458639916
601.9264589807331	263.6367849645865	22.953576153884516	29.836900558433527
605.5576610194951	267.8004893490483	21.498214227470953	27.316533940620435
606.4161089432371	270.2432436931548	20.54868820723356	29.33735369762622
612.4018717203506	269.4377593183239	20.315459254503846	31.73087555405443
615.9300138592276	255.95844525877604	24.66474736939902	29.36088894919494
619.629067727478	250.53111628074512	23.216594004623836	26.615651198455737
623.5646992746657	248.99590384486865	21.619756807765313	31.254682544587872
628.2822255366931	244.44104096217518	21.30595957187221	33.730768100402635
626.0114695809716	244.76277179325973	24.986290639969678	34.80966812492417
616.213099963144	252.82119955443227	25.813300020406807	32.77010999399258
613.3485879641933	252.66791888751345	26.93759541625564	32.15572560741978
609.8355636954361	249.08406953896292	24.66668399814474	35.604640322270804
609.2199272155211	248.02900959815628	25.89795695797467	35.82428191030068
610.6191742110077	253.31566154294237	26.974887735613546	39.78382090302391
614.3730175030555	266.48536991918553	27.838954691859566	38.55966477156235
619.2170980395019	272.9957083718572	28.57313932954733	38.04580271891574
626.0452265938852	277.46134727737234	30.613818111723692	36.439761656992104
626.1048790654518	275.60267554183645	32.604443139375974	38.04717515727852
623.90449457265	283.4952029254921	38.11701035994211	37.82729567944423
632.1030255474146	288.9916057157846	38.46354448014143	36.40225928156128
635.1096020341598	287.00382441454116	37.165900749964166	38.02006726239176
634.5697646778575	282.2447244525774	39.4295873524829	42.802219626662094
634.3565262029038	288.45461260068373	41.15078106832203	45.91904452162877
635.4959311216542	293.8845325738739	44.35462814526868	46.02451840414312
641.1467333277176	293.69166539398014	43.01565409942637	50.679951492338475
637.9082595922426	290.191494913539	49.49260157037638	53.257432356423195
642.3264860366476	300.5949432265074	51.98102308555543	56.71812373903426
643.4852527229255	305.47743782921026	58.22044549641921	55.51009031704784
644.4332089053026	306.94185231541553	56.32453313166478	65.11759569315569
643.7727794149396	297.66412571049386	57.64539211239091	72.20572421539555
647.2720955314904	297.8414279631833	58.81349201615796	82.05953488110256
653.6611006178541	304.9069471297995	59.30093544964192	81.19395015408162
657.5910807352489	304.35913688885637	60.26414332769683	86.70115469239016
661.0951394260395	293.3204347575368	57.86609317725875	101.86345810831429
646.1042381850551	308.0157012946664	72.89916312631536	92.40456841127121
658.0746060918794	320.42181475714744	72.34649096434865	88.38173139891536
675.5718001065453	324.66035494785905	67.68812674194051	97.60066490486426
675.8172967622205	333.44612300824883	67.19713343059023	95.5828991873374
680.920865292774	323.19143556275304	72.31221143500107	110.98486905648976
674.520530285251	335.8052322886767	85.11288145004706	108.72096890076173
697.4137629590977	357.8341070736709	81.98212246122009	104.2720895211492
707.2641292201646	365.08317939610095	85.70444116188634	107.34123329338922
716.215515746732	380.1585172258849	89.04885093552573	101.47305229299181
723.7648627591983	402.0088101618994	91.94265467507357	93.757461949924
721.9584355269841	344.6392419880983	75.08487453278477	117.84093075349341
753.7214819788998	409.9444929919401	81.00708303802895	101.97110063906462
757.7103126816065	412.4606322343302	96.043935403263	105.56926481827725
762.4217265717887	409.90390176821916	102.49173271549978	110.68272575049932
760.6127919892085	402.6580015361202	102.75314339872371	125.17452621469732
756.2141459385666	397.08789075134683	111.55043550000744	129.1446122868174
753.6800976305698	403.80319091928504	116.61853211600133	138.44165601786176
750.3589772717107	414.1493761562507	123.26077283371933	141.82739714137784
749.5339779707308	417.5716226754066	124.91077143567922	134.98290410306592
744.7023814313012	418.2075690720826	130.4819191917617	137.80305663249072
726.1031832240083	418.4400232987275	138.10834691961585	133.11358122395342
724.4411013762261	379.9261749555992	137.1614802202004	150.34685238049786
724.5618195080435	424.0601295192162	136.92004395656562	152.60893888799464
705.9372988135622	411.45880136973966	137.70638357626655	168.69591974463228
702.0351003211622	425.4949361665531	140.69172123481061	169.53800610854032
693.4848165927081	416.1071129202908	148.0318393388971	173.67297857183223
688.3744454374689	412.78680010595303	153.19038867386627	180.31360420050777
684.9255875526958	424.2216803179025	160.08810444341248	183.68228032436917
680.532636396408	413.21787827925147	163.4634885483694	184.04781157119635
679.6836362599478	440.92221558571305	159.691270610205	188.81153728020584
663.4631386498792	430.25009445724095	153.74817696481463	204.67233827064615
662.1466456645139	423.1200553026682	156.381162935545	213.30225969489294
660.7545547544746	437.493232089966	159.16534475562366	219.3829541930043
670.9760419546981	445.82490917477145	174.3773948178558	214.60460817761975
