# Supplementary material
Source: ML conference proceedings conference paper supplement (https://proceedings.neurips.cc/paper_files/paper/2022/hash/1c8c87c36dc1e49e63555f95fa56b153-Abstract.html)
Supplement: Supplementary file 1 [file 1c8c87c36dc1e49e63555f95fa56b153-Supplemental-Conference.zip › GOT-10k-Results/VLT_SCAR/GOT-10k_Test_000027/GOT-10k_Test_000027_001.txt]

642.5	394.5	54.0	48.0
637.5733569479313	396.5028223001501	56.430868919394214	46.2055639920714
634.1041875828585	403.14858875835967	63.36920764953997	47.442867839912445
627.4693993983607	409.7914957389388	62.714301404805276	49.82209681920037
644.9278516816858	424.9918460085589	56.10646888206414	45.96115132112453
670.000210227487	428.15443710752123	55.72846306907893	50.87361360546844
667.3739948206165	423.9768894305907	50.91086845537697	47.480345960646204
674.93150213552	412.5936760794456	55.93587599645819	47.00828554268088
678.2473939956567	410.2954467473332	49.30409227618479	51.60474420690569
685.0820800164444	420.5443059569715	49.935830730550016	45.40813628356957
693.8519174509292	435.2110400440832	54.912003144233054	44.59474133404003
673.1311486205158	451.5233457134307	66.61990593774414	46.39854931539506
694.9793145321742	454.5681161076449	74.33134617455381	49.17241750285038
700.076986968778	445.0845039606357	64.13600130134623	56.53068557473205
703.2226112825728	427.18063951325445	57.8447526737565	69.54658693848242
703.5373727339096	411.2845378116136	49.19904670304079	73.2821496036167
689.046368843405	392.8916827533657	53.22763930494199	81.27545759037267
676.3618615188569	404.29958322144495	61.74374049908944	90.05886938224312
635.7803556370776	409.10564315442554	76.2619108329785	94.72778696549672
627.8293263943252	406.8575279731699	73.34221056133873	109.97930804637635
628.5069438750924	383.45871035397346	60.496961450610975	122.30690083718892
633.3043457879817	352.38723243086616	73.60105706644367	124.86524564917407
636.7285665852112	342.96657973298375	85.34828213194155	131.30943993830098
613.9480669781506	320.39218849525696	103.76779902361277	132.3533136397735
642.1963525589395	293.7164052293533	102.94559043748306	141.16539011122217
577.6594439403952	290.13476594204235	120.87778241217	121.50137982940224
587.1317047897145	290.30489024046483	105.75025223622723	136.42909732333982
576.7047452509696	275.576270257544	118.99179119643202	143.04919693732683
536.3668598149525	299.0285472156013	133.71108701566317	153.856558692415
524.2365097005671	286.091404694507	153.44594187615684	161.6274622614952
527.061167862804	311.70209392238485	157.7193608838321	155.05839280041036
517.3803703470212	312.9365465973144	147.5274198001727	152.5894874505512
529.5148104864599	344.66350802743784	156.34111653437876	155.30071861647093
513.0730129111502	311.9336670390638	169.59375729210677	122.60562862876293
556.7442471780518	382.71667996691934	160.2246248013727	123.2262743810015
654.7025179955509	358.32699674109506	155.84199365410456	118.55431697560914
753.3796211585264	341.74349752685055	165.42614382778518	117.23158932082612
642.5237866123655	355.8754588553495	152.07765193641848	133.31864043433558
697.2029076359413	341.23886068430966	137.05145047211062	149.11583097886611
843.0781767779257	416.091834201775	160.6908148103826	134.5769850677529
794.6654293952217	441.5984410079828	169.25488655821115	120.72647588379175
667.1780092658495	377.0955357196825	155.74309573470026	145.0680065469708
571.1026897408643	290.5267800124882	153.69982115474514	128.74804124923713
475.8819247639251	266.5578385611724	161.9514304820145	110.03107514213372
402.4591273863731	313.5664904082156	142.51530609132288	135.39551852708013
431.04223784859363	402.8489950651933	150.9919253601638	127.50189371565776
503.02332490111354	353.6629535030569	147.24823090468536	129.47377208085717
500.18540487107725	388.1392653720617	144.2129133387287	125.85483053806686
503.1725090362609	440.33108548076564	133.9881268897658	123.48506516695329
605.9338886933206	399.09818881443744	123.05028494971194	112.71225225787002
670.0934047782868	385.65683517007653	106.08835478068508	135.88305614656156
775.5761597954456	388.1244285452359	127.1268692068585	127.14452473295603
692.22412734434	343.282162456367	125.65142955732016	128.73503071692016
708.2524079121027	339.45796753222663	117.63094287026996	140.3894329732801
754.9048358437759	468.3756925395997	129.8694344406038	134.23427299269417
679.905550754752	359.34604266624837	134.30400221478854	148.50396937398872
729.9105939693512	299.30630394301386	127.79148289367544	135.01549380890717
680.7797420925	427.69357698615465	118.45734409645078	155.50715737309218
689.7569188772193	440.1916203062648	104.80751771138264	169.2518153922054
646.2032221640659	416.2350348360804	131.91146148316932	152.8755759884456
594.6480691461245	417.52276849920975	131.9404517752936	145.8183123255017
642.7906280779869	354.2702465640797	131.85668338341844	154.25806366212845
554.2255270799387	231.9235190879947	133.39757033187374	142.32098123697713
581.5976420942868	337.97466861176844	148.11663462030467	134.26710924599033
592.4678954447809	382.0724920621435	157.49568340482594	112.75622409990343
582.5178565235301	391.8145060997507	130.74112267861867	148.40949615134502
419.63673073939214	301.31723454774624	157.72015799519423	127.28598120273293
398.0002294922213	301.787122805746	165.13809116143352	117.38243735470792
268.2553041543979	371.7044023479371	163.06776922455737	110.5445762088967
227.60179741300848	295.8899438071739	167.17345685462186	94.90395394287535
236.06969787338062	258.6816050684998	146.1498707182766	108.00385318620795
301.3239531776674	292.52164496774486	139.36653161977927	132.11986837906463
329.0283879982581	257.00385981358704	130.98261346348488	143.30550043388766
424.4105977792375	290.3478480515878	143.18336522504154	141.3936424653911
501.26232010810645	274.0778866993505	159.77713045119708	115.67399336748119
489.6677840295505	275.3305906914643	161.3467520043793	113.16858538325351
516.392730153861	276.7954751204542	146.6544555641008	110.2388165252737
536.5005915806287	271.9263975435524	158.8987898210387	115.94158267057936
593.5838715092018	285.89556450673166	178.49592035220326	126.8378685343756
565.1889597617263	280.86032690449565	201.7475474276241	127.32600190469628
581.544684359191	270.6165830370679	189.6321884719656	122.06837684046309
605.3023292766703	269.5524578502603	176.27519298089211	124.19662721407835
592.9807317609104	266.74276716548866	186.77627488508688	96.81774461986298
626.3973055797352	311.20577189072185	172.8573343075789	96.08208026963237
679.9981195445547	266.568253395824	162.069405383975	88.94341825339288
699.4877578397413	256.3304224770602	146.55491273145657	89.86509347604152
676.023814792899	247.87487711230665	123.253206712783	91.9910069187363
658.4968947389735	251.25533775294087	107.59620530389786	88.61080840525014
666.4842853825357	252.12542677699645	88.53516817605922	89.95688619785332
711.9190368048131	265.3259076934236	84.80282760063724	88.85381018506996
732.1404475425161	274.59397461377273	71.70564784970675	86.72506137905688
729.3064442029337	266.68812327145946	77.37365452887157	82.59942523754151
727.6042692741767	267.8737322847907	80.77800438638556	77.7092821739186
721.1768375343206	261.1194904835101	73.66690136654722	76.24329090181712
719.9000552150576	254.7908447422012	76.22046600507326	70.01495625951696
684.246636122214	259.17151540951176	80.75765753617202	68.1608197512326
653.8867484958239	268.0300104029727	68.84212672150518	66.84535048921802
635.7042124551781	275.2191054533381	73.15590649750952	52.46716038848729
627.5641810251636	279.0071283002118	61.83360437665597	52.77750468927778
642.4478173144767	287.59365750716137	57.31519447759103	50.03236780655631
