# Supplementary material
Source: ML conference proceedings conference paper supplement (https://proceedings.neurips.cc/paper_files/paper/2022/hash/1c8c87c36dc1e49e63555f95fa56b153-Abstract.html)
Supplement: Supplementary file 1 [file 1c8c87c36dc1e49e63555f95fa56b153-Supplemental-Conference.zip › GOT-10k-Results/VLT_SCAR/GOT-10k_Test_000028/GOT-10k_Test_000028_001.txt]

611.5	366.5	62.0	54.0
601.3683045982124	357.17312634471784	66.65790872867566	60.69963575438963
598.9209170081812	363.9250186246243	69.54760208407893	65.24158761650777
590.0837948246303	364.15890264805853	74.48748486482627	64.77381956963922
604.8373895573801	359.0342538255019	80.04841155572703	72.83135995497747
588.8714272007234	363.75352473179015	85.50460459048699	60.985933444350636
623.9807280952693	364.31188528611693	91.14789116595152	59.86921233569707
692.4695898073638	373.6283710363766	81.90365147852101	83.81406874743053
693.9251837405812	376.29569482108207	78.99246361208606	94.13752832051665
704.3809804265245	363.11245006572943	79.87164884334209	104.16093387886498
702.9896336263789	373.7303734003663	88.4380092796323	114.73525480758516
713.3769537151001	359.44827577087113	99.592086036569	117.75647651907241
732.1285980166582	318.3033603651452	120.22577864040672	117.97056915600083
725.7059381072576	281.09137739178334	133.07109845920803	132.37723021309444
722.7258041003892	295.18292735746553	143.21165154310606	133.45612577285752
646.4459880721774	294.77240822227265	156.36982191769823	129.920868365686
650.7294867216908	297.4441046661392	147.8028246186717	156.10339107573708
642.7201179550444	307.55805618140994	159.03608380104293	135.8754880451957
644.7131646652593	282.4772928557036	155.04999038061302	116.42659211641534
600.6843754739882	268.98462685445935	149.29096453662203	96.50362200563725
564.6842905818896	286.09557457492053	144.32313801785358	93.06892508590107
493.538129911416	338.2216693300195	141.66765882383592	96.59843340939501
450.9374383325401	319.06911426885154	140.95478229531489	97.54951758117761
438.59406231059324	294.3755502496399	139.45879663119632	90.8307791024315
410.47853533960694	372.54317471046085	137.98844828953938	100.38706174622428
428.1298211178242	344.4849536732238	140.10838814372707	104.11198784582734
466.4705003617714	311.8416306722641	132.4666023610794	108.03012477641632
454.2625652598445	340.60153714015155	141.752635852344	103.46474033470355
428.1243598976019	355.10696877186103	147.8301885952483	101.40321089387335
414.95742754627463	325.9060017341041	142.90106146224764	93.37128731861989
467.8121597405303	378.2032614761074	148.2014704058061	103.486970277752
385.3172504277752	336.01640367049333	139.48241598486374	101.00624936575394
349.0195915343535	309.91243064460247	129.02584647844054	104.1380801987871
367.6431348194217	374.6277906273833	143.11171701587529	103.03975300215345
286.6397039467267	338.5624261456594	142.84997096940867	113.35386947346552
303.75665396906504	316.40626657635016	152.92424619020676	105.30198148015917
306.544203775684	293.48954716743054	143.29991716614737	94.44620854649746
336.6037813509379	272.96776852074976	146.49249586021082	105.69600873653141
468.9321539778329	294.9552666227243	154.9694752476877	117.13944941631772
512.2292728047568	261.24882446919327	162.42115364076963	133.25456133414545
522.4009499213316	278.774011022115	188.58423371512004	135.4093356743021
449.19238247333635	252.84528577237586	223.13021783647656	110.9910015547116
400.86802076857225	242.30085225896607	200.4748473299722	121.7055995453544
432.27082376478364	236.25565454517363	213.2040725788498	133.7959949729393
443.2971947789069	210.39432469591094	229.15208163552586	147.51790358654216
464.0941030321485	213.3759498361094	234.73331060900597	141.5546533061452
276.7794393562955	210.36989076701047	221.26949665269123	147.56677144434312
259.46555104116845	181.88899999903805	238.55913024288645	158.2935048734643
232.44928283115541	139.80020691888114	267.72123203516173	155.42456983665033
199.82849604619506	165.09240412746465	293.334079017007	157.67847753691728
258.3370924444489	185.7735662365968	288.6653772891395	165.46861816118297
381.8086499886126	154.93939791639966	268.4621797470722	170.4519754150122
452.8390717703959	152.84881364040118	229.4335835419058	167.76432747644918
493.836035100263	149.49559396866078	197.3293262102342	180.7069754859378
550.6450158731597	212.7017908941183	220.60480371005295	167.38046606400667
599.3625471376035	277.7787633225037	220.69957313444786	183.52126913716006
501.15835629448003	265.8240428164055	213.62162755445743	207.4307101493565
527.9691026138237	341.7530570444399	206.41409890861337	208.07570624120115
487.6891950394524	361.2746642056876	189.06313314777128	214.72418967651197
433.1078045551075	363.1442506166783	183.82431379145433	204.62937239203023
437.32939266358255	337.567693940715	175.38113757450418	206.8609897033424
477.60364466550584	314.30575185273375	185.04946536863264	193.2403193473217
529.8661632739933	267.69290703704223	211.57777514510167	185.19751357467987
603.5640814419785	264.8274538738457	207.81639050246872	178.4384675799132
599.7729038222592	283.0893341230918	215.39874574190742	172.30647498163324
617.143162832302	292.13116814944055	223.33133677476664	166.41512380120582
610.4269013964587	357.3649352763989	230.64250358841701	176.73877888212428
616.7419237565573	494.2714708024099	230.81525424246496	190.9886037506194
521.157055471591	233.6947318959006	222.92977384968043	221.1392130556021
572.5314116962502	326.1768535707884	225.07903409896977	204.01172602359873
585.2254952063156	298.16820711961384	206.4461654484	205.9866319694582
682.8145477663709	459.2021140197369	245.08819265873865	176.19398358227346
610.0891492600621	347.85754361829584	238.45955196357184	193.90649095292446
772.4092150550732	352.2633272490996	247.0130862993442	178.2950529581376
974.1768645809148	350.69788040285846	284.08547298345906	154.72245054541997
1008.383407566799	413.08324948259553	236.1770150267252	187.15386050120924
1050.920302894962	382.3763592003012	230.96854382044063	182.01320819076332
1060.1256857547748	462.11151683978215	219.04999402246585	171.86385910977208
1088.9210159371123	325.20441660633026	204.47364358486405	163.0125943416228
1050.4769621574583	292.209094444388	200.47018108851483	153.88963789954002
1034.0767039868983	234.3953422262756	160.88145341575853	163.71747800779198
1107.9142791240274	281.28161055152026	135.8881931993314	172.17984973882835
1197.391702403308	375.2296014516148	111.91068997802367	168.31946315162736
1155.3670155600164	358.7389182146612	130.1000966312948	135.44086259222271
1142.1079494023988	453.46680506725926	127.34747742274833	121.6095980297163
1208.5236709907856	410.83108835295525	142.9526580184288	104.9526196136238
1207.7781100485518	363.8362112610695	144.44377990289664	101.62894737654327
1120.1366176668482	234.35145884392983	161.44753939876654	94.22609749228411
1029.9388449439066	228.86057703472085	170.21228555504263	73.27654961496128
1114.6000823504999	242.64192502106312	173.74562202957517	68.2602638102401
1115.9691300316688	288.3886119679484	163.5685153894819	62.31551961065835
1143.628874496716	347.6103337925473	146.38309577065127	65.20775104275396
1150.473395460405	357.795216161313	135.9643147749757	64.45955189543893
1153.7738740721845	341.24982148543506	129.3633575514169	63.388106650492546
1171.5139774179963	399.12880367389886	111.82718774438594	70.24772765161488
1083.7893900717797	332.8905385986857	116.36224094812653	74.53866668552179
1037.5889410961768	307.9268707272189	98.19893199512816	88.60734072979457
951.996847183163	281.0454644179382	107.63573979159966	77.67120133653358
920.2796324417949	282.0064068806649	107.0795205160791	75.74931641108026
895.1341175053801	293.7337364265137	108.60424499424047	75.2435069168736
