# Supplementary material
Source: ML conference proceedings conference paper supplement (https://proceedings.neurips.cc/paper_files/paper/2022/hash/1c8c87c36dc1e49e63555f95fa56b153-Abstract.html)
Supplement: Supplementary file 1 [file 1c8c87c36dc1e49e63555f95fa56b153-Supplemental-Conference.zip › GOT-10k-Results/VLT_SCAR/GOT-10k_Test_000029/GOT-10k_Test_000029_001.txt]

493.5	248.5	108.0	113.0
504.5176538008808	272.80097101893546	112.80543057475602	91.23879613864665
500.8715556181283	284.9915786476573	120.097626940261	92.52801734467118
496.54249554657827	307.03661232191496	102.02461888171362	98.55881537424484
502.8908598853684	338.0120809878529	95.6452429153662	102.94008151031427
484.5096869020584	381.5081818338834	101.13958486610395	109.75189186590043
535.444375499536	389.31471274993896	98.88320399166813	120.7022957192612
532.9533345044184	372.6567593020824	86.59644143229545	126.3880513356018
511.9779387166317	322.05237669475866	78.45593066971924	127.41421187395002
491.1147930724252	264.0952231385841	78.33458596330208	127.44275776984635
448.45228613028235	216.2763975301644	86.44114897456922	126.55734539541268
446.3837048126542	188.11399417931756	90.57831160982548	126.11233757423159
449.0286991505524	193.00006789220333	105.69409047024898	116.34019014846001
439.44600550653126	201.52591196925187	96.89469488593386	109.77529557149693
450.31389865055615	198.30913139913991	127.20794645210465	103.19659724816566
485.53302904619335	195.1525033891789	147.35690677963305	109.50985326808774
541.5299968602424	203.61705738567764	132.18265919776235	104.68320628086869
606.5171272499431	220.9434923736201	121.37259505323615	96.09750431886272
633.7543854711103	220.80543976487832	104.5064020793128	99.79254803347456
655.3352870874935	234.05102151204926	93.51552075685058	105.47230644943679
667.5319628554345	282.7768399294391	94.18018490288918	114.51723626281989
677.7977879724679	310.3962486232799	86.77921495228077	108.51846993810798
663.7419054306769	354.34444871218216	93.39547192867053	112.74567593398456
740.2435172048501	334.03352723862554	112.25745615059793	101.48368257309045
708.1070887436558	333.72358006498024	102.50178708018501	122.29317491841792
800.148382841074	375.32019152842355	109.39810526552034	127.51611235272188
847.8926796642335	386.1329269899972	114.57102111317724	128.25986576156913
815.3259088460692	304.5783151515876	118.5431367606898	119.35257884484281
822.2451436812362	298.97508183328176	130.92935369461472	96.84159127597889
772.0859562262451	304.68380747484764	123.94110128490861	103.30857787946178
718.1594034199909	284.253861689487	117.39274593779109	111.99305855528829
656.7695867722804	237.15923052057468	124.58439030828845	94.20645662209327
550.8139887412947	253.4073528387053	123.38842133243398	92.64512303970997
460.17759417037	280.1816276021583	124.80677605195426	86.60529203945687
479.29220021824705	289.47372577164305	129.68176412479613	101.17817275325353
494.5606850683906	301.8116477664013	131.80269193635306	109.16022627558112
536.5129537325372	340.3309909620824	138.87017987317256	107.93156093847918
559.4172576300588	385.02388357965884	147.36756382551772	107.76276214546456
495.4374877404571	423.4375921539171	155.15671045750355	111.0489404284263
533.589431334364	388.7277498049827	154.05329349476233	121.9793705067942
567.809151898253	374.5598735603321	159.38753748842842	115.59809470365116
693.5223621219754	352.24973149847415	149.69821569139964	134.31797540053668
690.068800721045	314.4253401633938	147.6632263095298	142.90091669271732
696.188705528743	323.9034744732894	167.45303406299035	142.24728656941542
632.2115373136461	309.7724781867461	183.32536956968124	146.1436267678274
628.705453600094	325.8496711938094	190.3375369967855	150.25079141874863
635.0931615537476	323.7531890567278	215.04222087165107	143.73515575514824
623.1808258722314	315.63567258937246	193.8903322588148	159.97018868985896
688.7175563988577	314.66273871709984	224.23673982017243	134.08504460429896
627.142942767895	340.72507303244305	235.42525142416923	126.74466223678402
533.2202727093319	322.2765615924169	214.6313351329356	152.36388747314123
314.58483665935296	349.8878362639251	248.79895423356578	137.45166343005752
517.3985041315759	356.6819523456608	234.41756786364286	147.94010502501843
560.8722495266045	314.1237234503145	219.2631462228661	143.3152263791108
558.8619694104815	295.53470315742624	189.21274671598826	169.13628038517948
464.501748471601	270.2343167814796	225.6241043761965	129.47981804518963
470.87846923438684	255.19468062171546	185.16711981819176	148.47767315174463
471.94671009274157	272.7184702168789	183.03063810148234	150.15419827764705
393.90064321070304	267.80133449244846	213.3479991813593	123.3041610269497
461.7594120750523	306.3214262264517	193.21814687204295	130.32774877303927
573.878633513233	373.4450061807614	176.89438535717744	138.07110296495367
738.7903464829478	310.6519393458289	173.81434239726002	134.94014637016247
889.494699060223	319.42484677002176	207.23717478877313	117.39433152177673
793.2910558317773	340.97940187944096	207.24570623485465	124.91647262157254
672.4313392629116	364.9253499261927	210.19865602757227	123.73975805209338
611.0422717350418	340.03844664872895	202.61124250247468	152.65507683408703
613.7163595633826	336.46655518441924	191.68216682473496	159.7988597627064
634.1881640963563	335.36826512621496	161.79743392796865	150.93656370993432
630.0279805777465	312.76165783444327	130.72418257316298	146.90775530344604
609.447296714881	312.41770143943353	119.44196120274327	147.5956680934655
645.6181375329548	367.4502372163538	110.09232872574927	155.11575497004526
687.9611178323983	370.27472167145095	121.11930095169373	157.78964978374944
734.6389327099446	355.3393435593903	124.18451969043758	143.8327476015815
679.306718063708	355.0566096124925	129.40124961045694	157.0519394200715
674.9765380683616	297.2255402050812	106.52089252397741	187.10356045399763
680.886222358792	364.5619172956811	140.5041876763275	157.77693285918303
582.7624041493822	381.2779442027676	148.9369791132121	157.21247691684857
627.438654739967	294.54811873403503	160.8215071050309	147.48131316033476
440.4161739349371	233.28256055104265	190.2306144188376	143.80775048825515
437.84039652795593	315.1829209745996	174.3912439462719	147.93443193336478
476.6543357689325	343.0645671214604	177.91085807556155	132.74488594526454
536.1907196826805	249.5626517378914	166.1820931242986	129.4570752499896
597.13448333192	217.84611802719976	179.0501940820929	123.18895564226584
532.0449902859733	254.58883857964412	162.31075034151974	125.53238154768246
525.9252810681888	313.71790668891106	165.5027632853299	111.31940848437597
626.2322912683799	299.7900076572711	168.7971662365271	108.80586689954825
592.0705801946016	264.67732136290726	171.92899966824857	113.8396507724407
593.2128060600244	370.58753102563156	169.64454793740288	90.05277619706673
478.27462630675	281.4558156694803	152.99439323525652	110.70089454643298
480.2388157949838	234.8360444606705	165.62324261416464	96.31845265411027
376.8877479279595	351.6613603046716	180.1512698136392	79.37479441998946
515.618436939051	281.53561143559216	147.25427764657334	111.3764820255554
551.0504269156609	258.26859310193	125.14769221151607	137.5949376436454
421.0580481661001	145.8273556727341	149.35090882174015	139.10542639676584
490.7474745558141	139.1137705447149	146.22914762490072	147.9906936000513
532.8458875255777	111.60566797895946	140.79948529272215	133.50646025448978
618.9803368834088	135.6169086118101	128.3482740291933	120.03915465411463
669.5968220217591	152.64826575724533	117.06981827761578	113.35390130567288
688.2049709308308	165.76754614928348	105.25373466805164	101.62974864078481
718.0505511424357	179.8987296463348	104.20446185799364	89.65679487255761
