# Supplementary material
Source: ML conference proceedings conference paper supplement (https://proceedings.neurips.cc/paper_files/paper/2022/hash/1c8c87c36dc1e49e63555f95fa56b153-Abstract.html)
Supplement: Supplementary file 1 [file 1c8c87c36dc1e49e63555f95fa56b153-Supplemental-Conference.zip › GOT-10k-Results/VLT_SCAR/GOT-10k_Test_000030/GOT-10k_Test_000030_001.txt]

389.5	578.5	357.0	340.0
386.6892978557777	561.9379079964064	350.6458425749873	328.2219371533581
385.85605012218	560.1429885771215	352.3123380421826	331.8117759919278
385.44919083327824	559.5090409359948	353.1260566199861	333.07967127418135
384.7795375007618	560.0784415122246	354.46536328501895	331.9408701217217
385.15093974078826	564.9334493417578	353.72255880496607	333.0389463403627
391.2247439139932	565.491107597285	352.38886594074313	331.9236298293084
398.07338612121447	568.4650525197524	349.46695139443466	336.7511098525075
397.52592073376854	569.0346971095846	350.56188216932657	335.61182067284324
404.7656878105345	571.9773972387653	346.8875918887796	329.72642041448165
402.8473240414756	577.5304016738647	350.7243194268973	329.27489346711536
431.37717715241547	587.6974998641524	347.20119859065267	319.6480141636672
462.22753759032986	602.1511261945991	358.9957255044884	301.240082615583
500.8127991663079	619.62208247831	364.92491477541296	266.2981700481612
584.974363643418	630.4332221365839	345.25388096554116	224.85561137903343
668.0433315973828	600.0923455452364	295.1787787052228	231.96990287821575
741.2489332212845	559.2856776610698	264.78026857413545	247.29027115128252
809.2308013450756	588.0273725930263	241.6975097639814	238.1844430462674
864.6242851054135	574.0614174750601	229.15343349573274	213.2163349155079
927.9121014247303	548.7812575148263	200.0923189027759	215.01939581313746
968.13498406863	565.6361633563415	198.0801813841232	213.99026236725143
978.131705026461	578.7914591515455	217.01527336157886	187.67967077684347
1010.148256201579	571.7104289561407	210.30282322975341	182.7348470948496
1070.144318575005	572.0163314740349	195.46865354717835	175.93727999645674
1083.6299988777305	584.8966729030336	203.5786336655931	156.02348725910358
1102.6104380716563	590.319761380341	205.17218134134606	145.17731030448877
1141.6268848493849	594.7147804773177	204.09804118262062	141.88432592458767
1191.7941593797368	602.2452301580192	190.58708634800672	137.6763758414459
1191.604661312678	618.2493041032897	185.81339456536028	131.43166753472653
1205.5528860127024	619.5232410777027	197.73775256834057	128.88379358590055
1224.8055653541844	614.7350753694818	200.15234607706816	128.23013695441944
1238.3542135895857	633.4041227008321	183.33560069398203	126.8739710987268
1257.6349273772125	648.9787073444073	173.9636836291524	120.04939390359644
1261.7848374893695	653.0863656506601	170.27448798690972	116.44470187316179
1305.3687977442542	652.6826838316556	150.5364377838805	121.74739019828688
1330.6893602429031	663.3715902212624	134.1508179441559	121.77926814255649
1295.9031320518882	685.8872453349948	151.343444882447	108.98169911123895
1329.2034181075824	687.0940181085308	146.03311890383583	114.7401863818705
1321.8902670508148	700.2846769847197	152.46088602406962	108.85520611274539
1306.4036202528016	712.037459597566	154.72812252182868	105.85396738581537
1304.4478490772622	728.1649109626849	154.5540944868689	106.2836277438833
1299.1271234633348	731.5494531194711	165.19554571472375	99.51454343031082
1218.4651610231258	844.538026712316	169.3340814580814	105.17902234134101
1206.1319412649013	880.8990144810867	163.94654536507161	109.73869837097979
1150.1132544529048	868.7334612215712	185.91877412995836	95.4704570932511
1122.072982024408	899.5427476337802	185.14094263295374	95.08398188083102
1004.7390700457416	893.0001907374734	193.31517431638417	90.74651165237515
1101.743330360721	906.9974199523142	188.50253199152272	97.95128639573505
1228.4004995970445	949.0841124310523	171.27035549961008	111.77427056233735
1072.0764268401172	918.7413694903847	186.92699674024675	101.53641213962035
1030.9913400011853	930.4494176843458	201.70671524485562	91.59840678634896
1151.1451398185109	1000.8140730016005	201.85376052074048	91.51237902403996
1256.9860446325508	955.5082664847273	185.28476756647478	109.52387422566946
1362.876329198554	839.8643536279634	222.1294274165058	87.5823000500854
1455.8009073912174	731.9935412999773	221.95533301633265	84.32256954408143
1417.5443853657293	830.8096333323044	232.66909485268084	79.38828339369422
1374.8229095939591	737.0363773348053	213.30900815569612	81.14759123503491
1481.812751421498	855.0173451544068	216.2334164413822	84.68392378042536
1503.0903107843778	830.7120370331052	233.79374021145875	73.17909752719247
1518.4161565211953	832.3919496667181	240.46892204960744	69.81927225996662
1635.802451062881	675.9428175856583	212.41045294375982	100.83464554364478
1737.201564879997	818.9750266905226	179.50677187373626	120.58041114949195
1747.898974199949	926.5030844019852	153.40900358886773	135.9688283298525
1766.6513436571436	830.806368443579	125.01438804076643	154.26991628719287
1771.9583357721667	822.9604919008088	114.40040381072025	156.7852455852639
1780.0203360752844	840.3370273722807	111.04914255479022	151.8352331263662
1767.7086463770327	937.9556533171933	131.5450858095213	129.95029919096862
1775.386839302985	861.7037687292232	116.18869995761693	138.32342391029613
1780.3810327399765	879.7778990190767	110.20458678465467	126.200805536714
1798.960805194359	828.2570229337795	99.09055995410539	125.0604853944455
1800.3068670293057	821.0838033499767	96.39843628421161	118.26286570114259
1803.9476927564756	818.8975654946031	92.49289104659385	115.88312897844645
1806.4969091407988	810.8631656993273	87.39445827794721	115.57023042179941
1817.2904089404276	800.9601169634695	84.93897123831866	113.05622990728119
1817.4462635718455	803.9370364766011	84.62726197548285	103.99222624044168
1819.9272820463495	801.6422929476183	85.59816382500654	99.68230510060971
1825.857309871913	796.3604086047181	73.73810817387931	107.33037938689891
1836.688889544288	780.5257716339186	66.27083776033717	110.60787546608262
1833.9061904227187	773.2525076249909	69.07270836775997	103.04618239820849
1835.0226824144388	767.0715999548468	66.83972438431944	99.22419177115513
1834.0555081215778	761.8762114862539	68.77407297004159	91.3959407673926
1839.7776856280693	754.3420048410348	64.87791331687038	91.36796333820706
1835.4110856306013	789.7755749384683	71.1594050999221	81.793528440459
1833.1987287579916	788.4563425674265	75.58411884514125	72.39573429979
1843.4839932043042	738.3527723840449	66.66487072026914	74.73211621743036
1847.4484755151298	732.3172791334437	60.96172407939973	73.44819483394164
1843.5902513810863	760.2792676664482	66.56376535653487	61.9267645779111
1842.2792280522194	758.6370357174906	73.23209896120508	51.04922416155001
1842.9775010725525	755.7866818128242	71.83555292053872	48.952425939913624
1845.7036807502236	749.3129203300532	68.27681341463578	48.64460995938015
1857.1359598288352	702.9330439373406	58.25572747613475	57.00440245034607
1859.695093137198	690.6847337633865	53.13746085940905	59.71990183137778
1863.6042636113664	671.2108516380983	47.095645298740706	59.584107553248074
1864.7255974707803	668.8553296518957	44.85297757991293	59.26380424024265
1870.1594329545353	660.0770938235643	40.52811964330202	60.46324331965782
1870.2600319320732	662.0139154983706	40.32692168822639	59.7548999428018
1869.7855274963333	652.3765542841277	41.27593055970623	57.06852041223789
1869.2760351359705	667.7035557272709	43.838646506370246	51.11421714096977
1872.3339443003465	637.8516269833628	40.71127395958779	54.03760477137132
1868.4503566410756	656.4242481507213	46.99003515963098	46.66064480662001
