# Supplementary material
Source: ML conference proceedings conference paper supplement (https://proceedings.neurips.cc/paper_files/paper/2022/hash/1c8c87c36dc1e49e63555f95fa56b153-Abstract.html)
Supplement: Supplementary file 1 [file 1c8c87c36dc1e49e63555f95fa56b153-Supplemental-Conference.zip › GOT-10k-Results/VLT_SCAR/GOT-10k_Test_000031/GOT-10k_Test_000031_001.txt]

797.5	243.5	53.0	26.0
803.4898451395127	241.79871680475915	51.05246333741903	28.402566390481688
769.0382866158948	252.34651747603934	53.0773881900343	27.12272569817928
739.2882100834106	253.09786564436376	50.260055790521086	25.620029361530463
708.3369510333422	256.6076534028732	44.95350865224617	28.033305106043066
698.3515154085446	258.69565494506605	50.082916829215655	28.423906044003683
712.652146941071	281.02243117699754	50.8698637305027	24.179142283857864
724.4051134580552	244.57340985165797	41.320389117591084	35.436160241536186
752.5252212536612	248.76686069010526	41.85035760693326	30.67288733574082
725.8056737489005	245.78349839787234	37.215642813567534	36.639611920206704
740.1233964942832	254.3819920412396	35.33071609814002	38.05168117283751
732.3787976350986	254.49081728722481	33.48846859636798	38.98946036220984
722.0061172929304	246.02840835501962	32.563141321988134	38.805840364475756
734.0504274347028	225.97046239942782	32.054277550977176	37.37644699167129
691.4958866515276	202.5480972175289	35.21881992647336	36.14704769683469
662.1741598509147	182.545550639152	35.422168953298645	34.56975875257298
655.9417552588109	227.39976981337875	44.58033419867632	28.629633521151597
644.8747064812018	216.81917499197058	49.523661282453745	23.43164177442533
634.6061847076305	218.69221935143446	49.71379696391858	21.946320596128402
630.3130766110543	227.0704427564572	51.657275559525075	21.796717779948484
610.9306041449149	258.0691339899007	47.38310794360379	27.75582881021934
592.5002877091475	290.4824657155085	47.87594813282772	26.279513902384213
593.001255773476	330.8593086435728	50.34007751797331	25.24533486371583
624.3797255878577	331.3664307072673	45.09963822086735	26.578702994761752
608.5413862660832	349.94475988252196	43.19633800055475	26.360021394500073
619.031125043913	376.5422627381483	45.05066324605351	23.181917057213344
624.4295085034485	397.37032713957086	44.860314788890236	22.89082025580798
638.205166933613	397.2039990822106	46.78823808256159	22.17064636502845
651.5589132681606	388.86196538003946	46.79392057003962	21.75828166916384
659.066580151028	368.088141700869	45.576933980964725	21.91088749752503
680.039599236662	334.3640542865592	46.53067956317181	22.39354622315922
691.6141303933966	321.91925851215626	45.82330963708999	21.635489329236457
700.3124200003026	313.32156508395155	45.14883597186416	22.10877063705974
718.8618454074608	350.85936178970735	45.61679247372262	24.253836708796218
679.3168428562385	382.530977755776	55.11376564806591	20.71711658987089
669.3242782397103	418.4273479378502	57.65286497784413	19.871564499054397
691.8743261569363	449.1142253556706	55.17883009048839	20.06878658699695
700.8046655014974	438.72649289560155	47.68887316240381	23.559715238738974
713.4589456747874	414.2193281361627	38.96764523263218	31.658624796156147
671.5238071183435	393.6002636164327	47.30795944438093	28.467363893769686
649.9863736070652	416.69272196753417	45.38874208452134	28.46058642615185
652.8727808363652	426.32273534477935	44.23719876031185	27.685644209224716
649.4426387234711	423.84129497272386	40.97140132021887	28.148044212944036
641.0487386956169	398.96047518016485	40.41837063058082	28.054795405190802
608.4650677769007	393.48464095644556	45.44652066003203	22.897751761205914
580.6255908344922	398.9662687218799	49.109913375051676	19.36529068316538
544.3589610193534	371.239444905894	52.17103685532019	21.135924017402882
511.30160968178615	356.231836220576	51.717231439560564	21.815866636119544
542.6788056925853	371.80414321779693	39.98446146700539	33.75617792753619
511.90220491683067	355.6594367483808	29.603160513781233	45.16138046176843
474.1918495456717	341.4584392903922	24.224611777233832	54.82731520873339
454.84015203681156	332.6580179749091	23.84420473324527	55.32899443770199
413.43830583643626	331.2410257980299	23.556878781716634	58.162978791460425
390.06409404328423	332.6714704768915	21.25312185994816	59.07533408820436
357.0598582754389	338.59250508042913	20.870779861141266	60.757319490008314
337.4880037452749	351.0381816845158	21.37220328944563	58.30342245526802
307.90744136857916	360.99919737639925	21.945888376013297	57.91053762710904
293.17258982651924	364.128596759139	22.008815161738323	57.77815059046189
279.15059583066244	361.86382443221447	20.66445826779333	58.634152133603614
265.66698394868894	362.7059343212043	20.95711478249268	58.16241268513508
238.52263654733358	372.9107330746955	20.748681866448422	57.129571700376744
216.9579926331855	377.0222795266452	18.562796710870323	60.8315243185495
173.94716125355833	395.388075179838	21.42618931524436	59.050510323635464
155.09680163302215	400.77685620008026	19.695321186492095	58.130845125607
126.64123097956099	399.4204845719627	20.7866638527347	59.65593309161503
108.014047442446	397.2334318145248	19.933178357772533	56.654325206001914
75.6081126422562	383.959911472542	21.514773341940696	57.44088363891839
45.59438985732073	372.95204713319714	22.213529878274063	56.45161044746091
11.789313592308318	407.67070151316017	31.78538341471664	43.84346945208419
-19.84014166822677	428.47716844229774	39.68028333645354	34.28534197242986
-6.608129696105422	422.84518162522954	34.16894582445481	35.07297239044421
23.208150378612523	426.2752696541336	34.508422764215325	36.93600172742829
17.404419548405485	438.8376319483523	30.36663115562075	38.80999702872013
17.57177630302497	425.79096953368963	33.29401316365315	35.54446220260321
-3.3749418274980805	438.5622486094462	27.494721107360178	40.3518220712149
27.139365922136605	466.7855781802851	33.475584012553384	34.96000361865146
7.6565833688294	478.93906155582005	30.412315310357787	36.51693459608013
16.73467160581405	485.8900802022585	26.996840994884245	38.408506758734326
36.57409957279495	493.7719866819932	33.4915210258827	30.853322415257864
43.92539433017866	480.55187217611535	26.893664858476704	35.0055347217696
37.16082912377245	494.0858435171105	22.914273392989756	36.14576617703926
33.25373792188457	500.8751754610397	24.258876022034897	34.5820361565377
45.23534382008099	496.2600107684395	22.449019433973437	35.5048573386138
68.36857826743753	483.4742180313465	32.407324815634645	27.522948486576386
102.37011073384872	509.26788945240486	28.528251788761786	35.344598145559864
104.37245629873094	518.5179327247596	25.52799935585502	36.933285538004185
109.32829325810292	532.2110719380814	21.493530266991662	39.9125653990769
103.38614285272033	545.8839801627339	22.860868137129827	35.51284991114002
101.53440007111759	545.2033823249494	19.25349635332467	37.787902755085156
94.32947404212557	541.3601529485916	19.48166169452231	39.26987356920698
91.00908771497694	544.2431482784602	18.82638015923095	37.15191000426398
97.00086146750812	542.8693471145428	15.539415111343988	39.029854086381285
99.83439365242408	529.7628117030932	14.907653690800085	39.22719300462557
97.36868753636442	532.2641790034053	20.669798337197584	33.393725989723364
116.97561613605399	507.9925444510352	18.657002300775023	37.126625966356855
117.80328155528964	510.08425324680695	23.06619811584343	32.07684742430777
139.99680454761838	502.2112312957706	24.550184081796623	30.51306794879168
155.77322307172048	500.1978812498405	21.570917527026253	35.40563381318001
133.52209400466884	478.0600387181392	21.541613228792635	32.47786269830558
136.65558735894453	483.4262408790147	22.045273159255792	31.90142833507627
