# Supplementary material
Source: ML conference proceedings conference paper supplement (https://proceedings.neurips.cc/paper_files/paper/2022/hash/1c8c87c36dc1e49e63555f95fa56b153-Abstract.html)
Supplement: Supplementary file 1 [file 1c8c87c36dc1e49e63555f95fa56b153-Supplemental-Conference.zip › GOT-10k-Results/VLT_SCAR/GOT-10k_Test_000032/GOT-10k_Test_000032_001.txt]

360.5	517.5	63.0	48.0
353.3395918853107	514.8508410682099	65.85659590487211	48.81024442207813
346.3854872642448	508.31401394724406	67.15933322456556	47.477645038365715
338.9120071575306	498.656797442062	67.71715192245783	48.80565115430963
330.6522522358255	490.9650977063868	67.77608620651972	49.55742790623936
322.67370625663943	480.4252471875674	68.99561938919958	46.68859593337834
314.6215485606246	472.63242489474777	70.59344207710816	47.767747814896566
307.16257555302195	465.4504986995712	70.6692250242458	47.289437137181956
301.7605816226893	458.26352549218376	70.38237925574248	46.87560537973219
296.7010492790791	452.9021991574732	71.31503090581005	44.73727979713917
293.71291298873854	446.0997495013221	71.84458090367552	45.63315974953795
289.30717518144684	445.1738082863172	71.46358240197588	43.808052533034534
286.7739966924032	436.90725364122164	71.12336047540367	45.92361807746752
285.67200826973317	434.88221771707504	69.66224040626474	46.30859301128167
285.4712573631301	428.88086853687423	70.06374221947084	45.59207307296018
284.72070975269924	429.21949103289074	71.56483744033261	44.91482808092707
286.56001601787585	428.54235163715146	71.53079122740542	46.269106872405686
287.1338012830074	422.8464019167309	70.38322069714224	44.750053852939665
286.1110914645686	423.8290501970446	72.42864033401995	42.7847572923123
291.6378992992104	426.134025139924	72.17086863419331	38.17480740655339
294.3307850999841	427.70787777078544	73.65304021210034	36.744087939694126
298.19660556837215	426.6736932417152	67.63547381085331	38.81245699783456
291.4990516748464	419.48799016844276	69.40420285674894	36.574750657013915
293.6794750450965	418.03445086476967	61.74571751553154	42.77946786507732
290.2348525789961	421.28973051876204	57.16002066595502	41.18674074928285
292.60693722530146	420.23365322086164	64.76507109505349	40.21159041465632
291.748886822592	419.848080550118	64.83934002537283	39.34090388104399
285.92183713440136	415.23704369250987	65.09532303098221	38.793163564170115
282.88102444824403	414.1454511925665	64.68543736664489	40.976348564056806
279.6506511430422	414.4588364790817	64.53234588037112	40.34957799102648
273.99852544898323	407.579574998214	64.35190001697529	42.62340370124802
269.3250078324552	408.7669233265499	60.29141454378218	40.24870704457627
265.1216981083349	407.68380161127993	59.24548897016949	40.83952630480725
257.94584050620034	406.0358393774225	62.61095193151793	40.996521560259026
256.73382368648674	405.74171028286764	61.78955924647572	39.962066587134174
254.5859783257119	399.9791300822779	61.30581836376588	41.928363779794374
253.91675604025934	399.6041860296053	62.644262934670984	42.67825188513958
256.03311945410724	398.6956609951846	63.36500038684938	44.49530195398094
257.5766734809162	398.06599439007346	61.96996892124197	45.75463516420328
259.0715588519439	396.5168421956599	62.36347589580744	45.469661836409486
262.2947698153457	396.0277692354991	60.995878803633644	46.44780775673113
263.378416080265	394.7104578112124	60.516730751767014	47.39428612733249
264.93481245507866	393.41411072984016	60.79642190632267	48.290738337985495
266.1182224696059	392.5031527904932	60.14468545743882	48.39757063650878
266.2832547823736	392.39951235418846	59.814620831903476	48.60485150911823
266.27800700001933	391.43921238548535	59.825116396611925	48.82034121754802
266.2571496013141	391.26367514056693	59.866831194022396	49.17141570738488
266.79376715202324	390.51993189716734	60.50866744028244	48.943830846505804
266.83025100447145	390.47717047482183	60.435699735386066	49.02935369119682
266.737786580666	390.4942060797194	60.6206285829969	48.99528248140167
266.87648734536253	391.0033678443827	60.34322705360387	47.97695895207508
265.7121658425814	389.98108231841417	62.67187005916613	48.31848167086015
264.0567979937892	389.11081846930813	64.23838395676533	48.314787569087045
264.3007380392373	387.677582956583	63.75050386586919	49.41320793147964
263.4652436364216	386.94842546699243	65.42149267150062	49.0929965283648
263.73357716477153	385.6370167311476	64.88482561480065	49.917025250024416
263.995143269579	384.5690714049055	64.3616934051857	50.248858351636166
264.4888331866274	384.39612131165313	63.37431357108888	50.59475853814095
264.3838684383472	383.7047287018008	63.58424306764938	50.18557829579541
264.77098767169446	383.2958206563379	62.81000460095484	49.21485257422976
264.63852692950513	383.33310503661244	63.07492608533349	49.14028381368075
264.4444185300471	383.13023819487324	63.46314288424952	49.546017497159106
264.34602794694973	382.59761585820837	63.65992405044427	48.8349673760323
264.2841628233521	383.0301519598917	63.78365429763949	47.969895172665616
262.82544842508435	384.0862164346208	64.94559519674449	45.85776622320743
261.5184400110974	386.62229895095214	67.55961202471838	40.7856011905448
262.64940082300603	387.97811555966234	65.29769040090115	39.76711743936785
266.04476047258424	387.97853406866466	60.14927722382363	39.766280421363206
268.60275586364276	388.3102932276045	53.46801988260217	40.668028662588
269.2707360320802	388.0528385661452	46.215949977257424	41.18293798550652
271.51574269903205	394.14527656642	41.72593664335376	40.00438023916933
272.98828560259545	393.0443786464608	36.20681039755774	42.20617607908781
278.446218558733	392.81491240576526	31.460675914415486	42.66510856047882
283.7777136010068	395.5964293360872	28.94566174374492	41.758060936335994
288.2037870116047	397.73874121181905	32.29102579982357	46.344354186526616
296.577523975088	397.6590474152636	34.04453015586297	46.50374177963747
305.5651412887759	395.9183644600206	38.83348781264654	49.98510769012358
319.34913587079825	399.02886208125324	44.76851786251725	53.535826385050214
332.2186212174921	399.84797368582235	43.774506202153646	51.89760317591201
348.69927990592123	399.5659191137878	43.929549235188084	53.9670014295217
363.7287779365414	405.55766400884175	46.2032187202756	55.84036830212577
376.5299525661966	408.32080546735506	44.67876438343711	55.12966436959353
391.19385160522353	406.3024754467288	45.17394863387281	57.596693761978244
404.73512923055813	408.80119604077686	45.55449597327183	62.292112311553325
424.5049706233394	408.0360596798714	43.266325893660316	75.67513907616666
430.31689108056787	418.79621223213223	48.34314900211871	70.85549799456042
443.6406102389022	423.1867086022473	51.595801378748476	75.15579493264838
450.34178520438985	425.0030254642338	50.118144973005	81.46040581303524
448.997212358732	425.17045884651003	52.807290664320675	79.0681848061135
447.31413739164026	421.7630517773432	56.17344059850414	85.88299894444718
436.58147411271113	420.7139083077235	59.840011150215865	90.20613038445497
426.2215168738393	409.1755691956248	61.75350249288002	96.82718836545767
402.0571820825963	400.15205008207545	70.36990972413325	97.50011181389203
380.49844159140764	396.39738142201253	73.96273436146637	105.00944913401794
355.2806734970453	378.8923256451392	79.47286722815403	114.74902131911885
327.8018176645591	355.74867270371146	85.69499771907104	112.30074602791885
301.2449950721099	347.24941890869366	92.14367983566723	116.85526346640722
286.39371746673544	335.9063120224978	95.56171308300014	132.97034674794497
267.35448312010317	318.6231895858126	104.94533557156493	138.8417454166156
245.64191545830948	311.8194839573268	121.56132595131609	144.7894009753484
