# Supplementary material
Source: ML conference proceedings conference paper supplement (https://proceedings.neurips.cc/paper_files/paper/2022/hash/1c8c87c36dc1e49e63555f95fa56b153-Abstract.html)
Supplement: Supplementary file 1 [file 1c8c87c36dc1e49e63555f95fa56b153-Supplemental-Conference.zip › GOT-10k-Results/VLT_SCAR/GOT-10k_Test_000033/GOT-10k_Test_000033_001.txt]

492.5	263.5	710.0	344.0
487.15911920586086	268.0393366652631	703.3354338537422	333.92132666947384
488.10148497784445	270.61698436690614	701.450702309775	328.7660312661877
480.3602367575427	272.281757366654	700.9769139028697	325.436485266692
478.42209653892075	273.47637156098824	704.8531943401135	323.04725687802346
470.4443365693494	274.23545046906406	704.902926535925	321.5290990618719
462.7467957625114	275.7964636889191	704.4180971217868	318.40707262216176
449.8400206210647	277.62425643118706	698.5954206985166	314.7514871376258
445.85918683715585	279.42799891893355	690.8876947297848	311.14400216213284
420.6131278905725	283.2239731905826	679.4032365805679	303.55205361883475
418.26489083132026	285.7816321804864	668.9056342144645	298.43673563902723
374.9857404674394	284.60163219040186	650.8010751581851	285.84489850719046
378.08843454357486	288.8341908345317	630.127989864	277.3797812189308
342.3827861863179	291.37521027555846	603.40660128255	258.27878729459667
354.98238921832734	290.187475257869	578.2073952185311	247.35930496374596
320.87629919641995	294.195081035245	557.257942704945	239.3440934089939
293.2582102774499	291.84805128902406	538.7383869336323	231.74553063322702
269.54272416115873	294.2887647056824	514.8270650285656	226.86410379991025
272.09957622104304	293.94849674204505	486.7974020055493	216.08666027556114
242.59193419997024	297.4259358579578	458.9178003065193	209.1317820437356
229.26387188379022	300.3074500529077	433.89902173401913	203.36875365383588
213.24319560867653	299.7169129046681	396.8490664547957	194.67964111753628
201.46860818882067	298.84221048368585	365.32791028472525	187.25065745787046
184.9484311768123	303.57193660001155	338.2500749091508	177.79120522521907
169.7030395158449	305.91099235162426	320.57394891702523	173.1130937219937
153.04112595315505	306.4499870437026	300.08593141430987	164.34769796239485
141.98018736710037	308.12277124832076	278.7954079410249	161.00212955315857
128.99483792948683	307.5500696003179	256.7211882476761	155.28397305365348
129.93400066952313	307.72999254390663	241.96502131595886	148.4852064406537
113.60692716428719	311.370141669356	225.7823092224305	141.20490818975495
114.84559648895399	313.02879703837635	211.8233149023763	137.8875974517142
108.43686957433758	316.2029388028011	208.2115644223383	131.53931392286472
105.75497717417737	316.13173638773395	208.2591113863323	126.36548091667262
102.79946804952326	318.5250723673256	208.94005269746492	121.57880895748923
94.72247873622675	318.55719950663644	199.29719814077401	116.35518804221081
85.71613260219459	319.8744584796647	182.81518478096297	113.72067009615417
90.86513535400564	321.12705519447894	163.24106735863148	111.21547666652573
87.51663984860639	320.4119268408134	148.42459175698235	108.34304005136727
91.00814650381392	321.1539628166571	137.41032894476626	102.82771859787883
94.09265789330433	321.97434369073267	127.46784218945267	97.41349287339494
95.64902564090451	322.9139790674417	120.82158393443244	92.00069936015717
98.97819203322244	324.4704783579656	114.1632511497966	85.54386063779774
101.12251783430254	324.9182759427944	109.8745995476364	81.51135550223037
112.72819575818923	321.945362081398	104.6972410777779	78.44018453606583
113.603234808884	323.9999106358127	102.94716297638837	74.33108742723645
125.48776241589984	323.24862728915747	98.6568379758697	70.26830263097166
130.68990471111988	321.05673288235397	96.2050447359612	66.69960009404716
142.7091208628674	320.49367876045596	92.60570065750096	62.7159362815844
152.71864735305243	320.45133132314373	92.0639358363123	60.365970136311134
164.5226323404679	315.73276513959485	89.94310637177946	57.86580221990991
174.96246472130733	316.1975369214873	89.88903908226864	56.93625865612501
