# Supplementary material
Source: ML conference proceedings conference paper supplement (https://proceedings.neurips.cc/paper_files/paper/2022/hash/1c8c87c36dc1e49e63555f95fa56b153-Abstract.html)
Supplement: Supplementary file 1 [file 1c8c87c36dc1e49e63555f95fa56b153-Supplemental-Conference.zip › GOT-10k-Results/VLT_SCAR/GOT-10k_Test_000034/GOT-10k_Test_000034_001.txt]

523.5	496.5	939.0	388.0
516.6934455706722	502.8250881258895	931.1708006285185	374.34982374822096
522.7021561163019	504.002554830044	919.1533795372591	371.994890339912
552.4730272444831	503.7071150682239	899.3543556665971	372.5857698635522
609.1199438870731	516.3747732489817	884.042529216872	366.8468548691275
637.842282495048	519.1652530746669	884.4183590305068	361.26589521775725
706.0492948629367	523.1698080488369	901.4419370904717	353.25678526941715
721.5939159304567	524.2684383914552	870.3526949554316	351.0595245841806
753.6389647812296	532.024192856838	806.2625972538858	354.3432200632709
834.529768821397	532.8441296391836	752.0460746774038	352.7033464985796
892.3199846352004	562.1026811349072	670.6878602665706	345.5195693322928
932.0645440157941	562.8202948492751	606.9958613419363	344.0843419035571
899.9535206738999	566.4389570793462	597.0484857082515	336.84701744341476
840.9575636919715	571.3346724503515	613.0951606279423	327.0555867014042
769.5817968123486	581.3565395297946	653.4142416367131	307.0118525425181
730.8552215124247	586.8213457714469	686.2368579043657	281.20539528181536
693.0877460499884	587.8305171899126	702.1807285492075	264.2892823748761
665.9712948933332	588.0551929737048	711.9407229686002	249.01562817598608
635.5321894518488	560.6251595564358	743.4436887260501	230.43758219672685
655.2378536524524	554.7279192002511	718.8275576654905	227.43686556844884
651.317715853767	552.8309043143505	712.2771121976548	216.84017427504367
579.2137530021892	559.2635720551948	729.5658164430479	203.9748387933551
482.0331148775592	562.0682729707119	698.2166538259646	198.36543696232104
507.2048584776255	568.7916435452378	674.9926602350417	184.91869581326912
222.18681038471755	571.7308262230273	647.9270812590019	179.04033045769
266.22178533625845	573.8398769186454	622.3011743216373	174.82222906645399
587.9748587125292	561.1901307377702	653.5106499274116	163.97624165900876
634.3210674786942	559.7624860682517	659.0838357396893	166.8315309980457
646.4855549078953	550.7985154019941	634.7548608812872	172.34388859050512
657.9600681255104	548.6992042986211	611.8058344460571	176.54251079725128
668.3957691770001	538.5888938772745	579.0019380972273	184.83063739409403
655.2895912858974	535.5318653931587	547.1065410247013	190.9446943623256
634.1116698868702	531.3297750095052	510.50624895657654	199.3488751296327
634.7774249079505	527.9904728599435	476.4536561057472	206.0274794287562
616.8812924489187	523.5235875960134	438.5030867058384	214.9612499566162
624.4616650695824	515.5692907292087	423.34234146451075	220.7307172448444
617.1230376155065	513.4716676073415	428.0029664235244	224.92596348857887
597.6160728622892	512.9931086966313	446.70239626514285	225.88308130999923
553.0180939020055	513.0813996809405	483.65730483010674	225.70649934138078
513.7979920789562	508.09245509355185	518.1579673461495	224.6995032336443
484.2838824023388	502.68950537954356	542.7819823872305	224.03733455760948
464.0057971897793	496.85450539217214	536.0893414064674	223.8951316808817
421.4372742652459	485.11202591425825	539.2347870902905	223.9539191609257
387.74047316998474	484.6800346193743	547.8307091999361	224.81790175069364
373.3047496079381	477.4628955235827	552.9043522704962	227.35327791551032
359.15167749683985	478.655893049264	557.1761710287656	224.96728286414753
364.6590922211676	478.9201774740992	570.2338485855269	224.4387140144772
354.93232081711847	478.6882498353936	601.9021285916847	224.90256929188843
353.11989974587607	485.50996059161923	618.2046138172038	223.93679086247153
400.4620300431852	485.74994356061995	613.7755050131555	223.45682492447008
460.0708466014863	501.8535260322345	597.1303169273128	216.8927712389309
496.09978962263347	503.4175963817265	574.9313428552266	213.76463053994684
563.735170118124	517.7858160384864	548.4747050593189	209.20910749199905
616.4877386703931	523.7332629582039	536.0027301702615	208.94335892949903
700.1113015602359	531.2064230310599	517.5443021320862	205.4423232254417
744.2013934858858	538.5999160667207	507.1847805731222	201.77257462445385
770.2137285678491	540.5057839822764	498.77056408801616	197.96083879334233
780.5707160736295	541.4664169753775	488.7700320230005	196.0395728071403
778.8124229103848	548.1196176520874	481.75141579996637	193.2683740032438
757.189786768321	555.0909938116123	473.073174972915	189.71032430642987
745.4079449503485	561.0783484873662	466.04805530370373	187.9318827233076
737.1401283794528	562.1903162227145	462.45692523606454	185.70794725261095
732.2206468240377	567.660681172833	462.32388708549786	184.7392186137709
742.6842418799223	573.0819066967358	461.30229227691575	183.84956521755902
777.801554607229	577.8599829768376	460.52312716006793	184.21562127703615
806.4502616671925	577.9756244159612	462.7308902561068	183.98433839878913
841.1280351332532	582.7793227306861	462.99156125416266	184.3221157593645
859.0265913245562	582.6059255603375	457.0593252265279	184.66891010006185
861.806740377544	582.1453582798124	461.3747631152247	185.59004466111185
859.5907942685446	587.9399226654665	465.8066553332234	183.95523102441797
