# Supplementary material
Source: ML conference proceedings conference paper supplement (https://proceedings.neurips.cc/paper_files/paper/2022/hash/1c8c87c36dc1e49e63555f95fa56b153-Abstract.html)
Supplement: Supplementary file 1 [file 1c8c87c36dc1e49e63555f95fa56b153-Supplemental-Conference.zip › GOT-10k-Results/VLT_SCAR/GOT-10k_Test_000035/GOT-10k_Test_000035_001.txt]

573.5	320.5	169.0	94.0
572.0319847733435	319.90483934052975	166.83661639635415	94.19032131894056
574.1468508570517	319.63916159613177	166.67755058099772	94.72167680773642
585.8044614461332	317.2802690108342	167.82640436665392	95.36211615102839
584.2098175076919	316.3480859104907	166.91045411229027	93.12124422046932
572.8862336418779	314.42336269506853	165.23626797891194	92.91713167381249
569.4964838479948	313.76180892701086	163.96510873013378	94.24023920992786
565.6868548633918	313.6028302352766	163.52638275105107	94.55819659339633
564.4905178044381	311.9564101662203	161.89117655696023	93.8231564195109
567.1872193945038	309.50633719772213	160.48894430883078	94.7321314245055
570.4658627780358	307.52915397685075	157.91739713794453	94.70075827007047
572.360502936782	305.6329985848904	154.1281168204522	94.54609437581958
571.0416419162664	303.7567900239629	152.87791303205773	94.41058566824896
567.0572233052226	300.3845935404261	149.24575198313266	93.4209797879806
557.7385732846727	294.4517878247556	145.106098073034	93.89811424372245
547.9795976694609	294.02309109852894	145.9131197531243	94.75550769617587
533.9472144132087	291.52707480038873	143.82916433310155	95.97895005089035
521.054729889536	291.3350840629002	139.55282275959468	96.36293152586748
509.51471607079714	290.2972606966427	136.7355720905761	98.43857825838242
507.440571250974	291.63340798614183	137.19262876103224	95.76628367938423
505.65523631690405	290.5263371549195	140.76329862917208	97.98042534182895
515.3479516183357	289.1975281676933	147.59021755913955	100.63804331628128
525.6986470163617	287.58509691276015	158.02150665892103	103.8629058261475
549.0167341723721	286.70842769473643	168.81413197898524	105.61624426219501
560.4772209056583	287.3091388110807	180.23710756526498	108.707815661113
557.3012119070911	305.3146689985705	186.58912556239932	104.30401128957605
552.167637540517	323.60499030305414	192.32133044999932	99.46797559944687
538.8785158114017	340.39189206087167	200.75329683663568	88.5770184233047
534.6672776489095	340.8939072291059	204.7058239841527	87.57298808683629
525.1472998646723	357.95477741950424	214.72685132766435	80.50803238092786
501.9151604974005	355.1159625244549	224.96984394335004	86.18566217102652
494.374535871712	364.9177347472826	230.49773518053243	90.4655127608577
485.20318018894966	362.6463566448653	238.97482826054733	95.0082689656923
495.87518586339877	373.47156785596724	243.31062692547678	93.90169455455049
510.66493234500774	376.89879966183037	249.9804830539019	92.22570938448754
526.8885441718678	385.25937102326986	254.2409998517336	85.992492504909
545.0800481684241	388.0178429308962	259.39114957654397	85.66719340439671
559.6982853457716	391.71059646447713	261.70867408462254	83.54068614769704
565.921292366024	394.16658814029444	270.27420869717685	83.88158995932721
571.3624413456025	398.0140441776661	275.53396565147193	81.56736285573463
575.3313900644878	398.1778664307477	278.4206193650806	81.23971834957138
581.2834682763352	399.2046815141448	277.41043536186754	79.18608818277725
595.6538943482094	400.0971617325017	270.2472927896241	77.40112774606341
618.6473362228992	398.7473305761665	261.0802990312492	74.84080577430456
646.9116314845868	397.82984481304953	255.37948991410119	71.5929991599157
689.6700376749731	396.444238939533	243.98723152553856	69.42257397413466
730.3359203208398	395.94207854116183	233.76037944313728	65.68656722358828
768.6785750819622	394.5917029852992	224.9679208853036	63.861128271019496
792.2989719652095	393.53004321690685	221.40723004228036	61.616437515457186
814.9223891481267	392.02678363621294	210.3667144696387	60.34716682769586
832.3213735061541	388.99217510986915	200.14649128735684	58.2238020357925
837.936200646916	386.4965971601765	196.74154536618673	59.30260375500092
840.7904880884971	381.53690032110944	183.26446538836927	61.45349233847989
833.9927980272653	383.9894855594207	178.19703275441412	56.54832186185739
822.8016070832855	383.5000684122099	172.0152034533081	53.95662975764585
804.9030099102426	380.65394019899026	159.7216964830069	49.34373590200225
794.3327569329598	377.3929784460858	158.63312079388052	49.514493223899194
783.3342523130173	371.17337139092666	155.32368789154364	52.46379153088408
756.8053002206672	367.22902986210784	160.82518517064608	54.01162033444215
733.5862819407193	365.8605440814676	154.83041736984347	53.47154162317892
707.090209123867	362.0370666189958	150.5505828231951	54.75494319474985
687.134698437673	359.5580598738476	143.302532352164	56.56901856215172
673.9344202692986	358.6542731788162	138.97708459702068	58.376591952214525
654.308453438041	358.4273221239189	132.59236999189497	58.83049406200921
635.676018573104	358.4558192704822	125.48643900404177	58.773499768882495
626.209501060318	358.31933415185665	118.73538212400648	59.04647000613366
618.4712577147177	358.45696800479925	112.13200259593259	58.77120230024848
616.2126367769938	359.663519711168	106.01568444013918	59.0164888953212
620.1822548812529	359.9111010567567	100.64889711270618	58.52132620414386
629.3357342016204	362.8298529154834	99.73394332058932	57.65296672915285
644.1779951042425	364.2536923322787	97.0685666310841	57.261573815174835
658.5507204392054	365.36196164377725	97.2443087196859	57.455134588721705
666.4229015950563	366.26639241387824	98.41182213864536	58.06225529575714
659.964577461403	368.0833461410205	113.772061302141	59.3155296338509
665.1021203020869	369.4164499290327	114.26438016574798	59.34117319407025
632.8948218186463	368.9677471151758	130.08753721741934	62.93810326151788
648.5229197599606	370.0177775277871	116.7919619731847	63.831479209361106
654.343398876276	368.68739420893405	113.59219275583933	66.49224584706718
648.3398850789964	365.2100503263483	125.59922035039838	65.01206927873369
648.890524997506	366.04476870464316	145.2431445685178	63.342632522144015
