# Supplementary material
Source: ML conference proceedings conference paper supplement (https://proceedings.neurips.cc/paper_files/paper/2022/hash/1c8c87c36dc1e49e63555f95fa56b153-Abstract.html)
Supplement: Supplementary file 1 [file 1c8c87c36dc1e49e63555f95fa56b153-Supplemental-Conference.zip › GOT-10k-Results/VLT_SCAR/GOT-10k_Test_000036/GOT-10k_Test_000036_001.txt]

1180.5	495.5	139.0	119.0
1179.8885493595933	495.62495311433224	139.2229012808134	117.7500937713355
1179.2281650380985	495.0906727826215	140.54366992380304	118.8186544347571
1176.3993190521508	491.2657189984255	142.12049961304618	122.38769972049695
1166.564351955558	491.7781764966783	145.14009538921178	121.36278472399121
1159.4812320060762	486.46096743952245	150.92089993548203	123.61176748560943
1155.048408527966	474.50064149686114	155.46854869933946	125.9424284091179
1157.331669372083	465.8624823731615	155.32759345102772	125.51648089682898
1164.3740063024425	462.83827141702864	158.9089508123798	131.5649028090948
1166.055691122446	477.98327851356504	164.6842242523831	133.26013939605866
1170.8940509071247	481.3480156432345	169.06403016428334	135.90168212422492
1171.4667644484696	495.9072100163952	172.7141088190535	140.35183354012207
1179.5648515886323	499.1693605258596	176.21226482364557	138.7511150924227
1177.4005061510663	508.3121326195101	180.54095569877734	140.2706696026083
1188.2018923576456	509.62133307480315	189.19132937650227	142.69445970716941
1186.0453121909316	508.8539660433562	193.50448970993068	144.22919377006343
1183.0647900925094	503.9165857966623	199.4655339067751	148.7994845411181
1180.1005895967348	485.54151803228456	205.393934898324	152.72986327766176
1176.4546147677436	483.94778864108576	212.68588455630658	155.9173220600593
1166.3513667947038	479.2975092476079	227.10484166409984	165.21788084701507
1141.4791644643938	474.81757598249175	233.73580277001255	174.17774737724733
1136.9972529292875	487.94633090981813	236.29293112145882	167.14032167889332
1133.177161835551	505.6485292252254	243.93311330893155	157.05553690997993
1128.8351075063497	508.07848004108155	258.89484183472763	152.19563527826767
1135.9432867441271	531.3434686637688	283.1931951739956	137.76125121191205
1142.9035123476674	529.8889098829752	301.9204902677911	140.6703687734993
1153.6850991004758	528.7742449335927	335.1838145434251	142.8996986722644
1145.332647742593	516.1164002497985	344.51365080126965	146.09018866609136
1141.014822556826	512.3779587104756	338.0164619003282	153.56707174473712
1135.4714589750793	510.29595627739747	333.8951567477087	157.73107661089344
1119.73954345808	526.7875563987812	334.89150554788023	155.21535860195294
1110.2076603788323	532.4129097475607	346.3678273321941	151.5520962785759
1094.5589955985702	540.5134171953853	354.5959106376977	150.73057888627375
1078.6821059259842	555.8731369520804	355.17243148173316	151.18839787402032
1073.8673416161748	555.5885576724505	349.1804552208082	151.75755643328003
1069.9461166506821	555.3384423395457	341.5546841719903	152.25778709908963
1062.401515896546	556.3428697864006	341.3790976183131	142.61653817440546
1057.4832391412695	556.4770129148576	336.2965164094956	134.88868455780602
1048.9586250851553	551.9778611477293	331.5993840554936	129.38941444790908
1051.9506336432419	549.2504364544241	325.61536693932067	134.8442638345196
1046.216027958524	547.2384361576559	322.8964962189969	131.77422338317618
1046.6976448686305	532.1687412331554	314.9330271127981	126.9124368022461
1046.2056468440016	528.502619028741	309.118149498766	127.44580754778534
1048.1498480696546	528.9465432525163	305.22974704746	126.55795910023477
1049.783493604299	525.9136779769424	295.30977987146014	125.97101354467193
1067.1731583679987	520.854726074938	267.02942086887026	129.5899468238717
1071.8246570701317	521.918730525447	251.57491659359545	127.46193792285351
1077.5597198325681	537.7604291384689	234.21625001047437	125.2212459880524
1086.4401783652308	543.4956602943914	205.26534708504306	136.13075539641872
1055.9331539456941	545.8443073103491	191.39778838990466	136.78214761694707
1062.7341920395459	564.7419236516964	172.6454472886679	135.03876932898487
1048.658806709774	558.2752852305637	162.10530518991635	143.13568207646347
1058.6045256758985	554.536489972794	142.21386725766726	141.00402566297205
1063.9072794307012	540.6839005988616	131.60835974806145	133.02829141564575
1065.3848608287465	518.7813274274621	124.48570563203943	114.32106795946805
1037.2959476614008	493.99384078971354	124.26525964556197	107.49776891379611
1023.5466257559789	470.73466277059526	126.23194438211682	102.952206803455
999.2055821357696	434.9359966199216	138.86861809942144	102.45871205857468
992.133819553765	422.4852227659827	134.0641362482444	104.62265134822896
996.7131659813015	434.14390630607465	128.65713492692782	96.312050403071
1010.1554947375076	451.62681009415275	126.50806633103107	93.14914286243483
1020.0515078071026	463.2557520746559	134.30949205300124	94.03552927994335
1026.932923564049	476.6633859442548	145.62048216416156	95.87605768366289
1032.0512484629123	482.6699162465782	150.51531619097926	95.21160994742452
1030.7325569869079	472.07362896810383	153.15269914298833	97.17850526557105
1036.6128245927227	470.62660653662545	141.39216393135857	96.1550414301924
1024.345274641276	446.50458771620123	136.13603027857909	95.98832454307271
1024.751648490646	428.13668890060103	120.75605462360569	107.23147325086448
1034.604712527832	419.9272592218827	97.46115145698056	120.06155751604788
1044.7477000609997	414.3017493162595	77.17517639064506	131.3125773272943
1048.0076052184274	408.4065406928279	67.39988461142259	120.31462432359015
1074.5716397985932	424.54708851124997	61.097804139759745	108.51989873803853
1086.4587147624216	447.19721022413347	63.77282419874085	100.24849329356428
1072.6465093623406	454.3111107134197	73.42826645843674	93.72167883233439
1055.3759918033118	461.9103955509978	84.32244828252972	86.40539358849958
1032.1498960845968	465.79271070380673	90.44597863733256	78.6407632828817
1017.0543027756802	452.2259782616722	86.04208030689473	79.16262436078839
998.4837308592557	443.65191305335907	99.7734599916525	72.9009906293233
983.6826262858565	431.33957629643146	104.97632851825892	75.83736136967434
971.9918696495823	429.42792691573777	108.49043639025481	79.66066013106175
956.6151505440978	425.73150814144753	109.70086714745021	78.19059544351015
925.7021286563162	413.6805382953382	121.40241226439073	78.70453576696511
908.2259813587474	394.6420522657886	131.2882684467087	79.1818502068349
902.7728832562103	393.54693340587903	135.6164682644674	81.3720879266541
912.5541664537088	394.25457897039706	129.61527715537005	83.34714061909293
918.5624642533556	405.49212747490327	124.26646625102981	80.87539769494137
919.8995906340483	426.57271651617435	121.59221348964459	80.47623693522728
921.2981478892724	450.0913518266268	112.46376138556171	80.92399826658358
919.1417863612967	472.9802417736815	113.74115047992244	80.67622779633403
914.2897486574334	500.83895896051666	120.39462468503537	73.76841266448386
