# Supplementary material
Source: ML conference proceedings conference paper supplement (https://proceedings.neurips.cc/paper_files/paper/2022/hash/1c8c87c36dc1e49e63555f95fa56b153-Abstract.html)
Supplement: Supplementary file 1 [file 1c8c87c36dc1e49e63555f95fa56b153-Supplemental-Conference.zip › GOT-10k-Results/VLT_SCAR/GOT-10k_Test_000037/GOT-10k_Test_000037_001.txt]

535.5	560.5	424.0	495.0
550.1774436381897	557.9625026166302	422.5683908419809	484.61335570755944
590.6365748590176	554.518024597721	427.3179545903638	462.94636968203156
601.0908036394128	556.2420318744578	434.44370411924467	445.4812515837224
614.1147923190232	570.1597083191588	436.10935350083747	445.3595254351337
623.4373141510448	552.6586731364616	445.22672699869025	424.83676147673555
730.3342030653077	645.057313760973	464.3473406710888	404.44963893424784
803.6090210352917	641.0510714168211	454.5348123319038	398.7884128624734
790.5375763343941	439.29185558683764	413.5227509838887	412.8081301735404
800.1118027595134	399.88911465299475	381.3612146075738	413.5351108847678
820.198011004466	393.3164885908496	353.7042867263227	414.1648744004041
808.5424276504232	398.3299450278295	340.76629464176864	404.1379615264442
808.9145242283598	395.1988920844484	328.30194330817744	398.6799092354886
768.1600864568521	399.6128504465064	318.32991105463725	389.8519925113726
739.8003800288395	420.8086179900371	308.2198673632402	380.87518569802245
704.040814405254	391.1130472038047	303.88139558122543	364.40872424130146
708.9673797210013	390.5997034958772	294.02826494973084	365.43541165715646
725.8132324258908	397.31636995585507	281.07660571029027	362.37210182236987
747.2525008629361	379.4538946986445	258.42369184160145	367.7586178286879
789.8034096949555	369.4892879038904	242.08628425149973	377.8643442647765
780.9631931022111	309.8931689811963	230.65385523197972	380.60513329012906
956.3026323459785	341.0589036647519	271.6659855096449	337.3805423993691
956.7075876606949	344.0135011967965	280.43339107045836	312.3167149547874
1006.634193980578	325.2087649539901	292.5554281599016	293.93856257579546
1049.7163009435303	317.73058905405236	280.28016957297723	290.42267554092587
1115.637110856394	286.4021211220104	274.2578313860974	290.16997058558616
1160.2696744393702	248.1113389122385	247.2069101857811	313.42507274887015
1201.8326708311035	214.26421388994302	225.7750009598405	337.052120252371
1236.16797210189	175.07816991285068	245.30444258491156	344.8641728732406
1269.0845635710891	123.52263066756097	244.2973709528364	364.6273939699763
1279.8482161914608	63.36696760350216	222.77006571209313	399.0567284726872
1293.245823443175	41.8689206318727	195.97485120866492	422.66548447809987
1304.7369569334753	24.278098657378763	172.9925842280641	438.6922207446294
1280.1668777033035	16.965411450625027	175.1182595523863	434.5118019037284
1239.8681250483296	27.208240421080745	199.43160380492213	414.02614396281695
1172.243458555408	39.76147133036142	239.5626043967667	388.9196821442556
1112.0509364041732	81.84236116845713	281.32973032211	363.7213412509089
1046.0617398644715	112.13970148935593	322.07019755222956	343.6768498754596
977.6386793132947	182.46918172193386	343.6052437670502	328.811789287613
890.2396808260285	183.99762521230198	370.16278583187665	325.7549023068768
843.4322428480959	226.9203488823852	387.1013838330131	316.5857329214389
911.0150556270596	231.8000736567233	406.88451192498894	317.894051490613
890.4325270421737	234.459386170598	413.87264972417995	312.57542646286356
938.030698235221	203.31108686747206	421.38689989743955	329.22287282051366
978.4499728378732	171.09840055838677	423.1366530937929	358.2532586951166
1041.2906162409458	164.56076145319165	408.1080511122191	395.9180224220783
1083.5967439999847	156.42078471538036	399.46458027590705	412.19797589770087
1125.4277208143508	154.90160012442203	392.49279220954736	415.23634507961754
1180.942295350981	111.95782075927752	370.49582555899894	412.09172138719396
1205.0483626488754	120.52234682263887	346.92341179193613	394.9626692604713
1254.1468974092302	114.16965826719229	330.4661849269015	395.9909259919822
1278.3320906503325	98.48812438741112	304.9530571058223	393.0681057598564
1330.098308024397	86.8213284231253	278.2144111142379	394.46061518655813
1353.339176909632	48.80662503541282	242.28636203413947	396.6142011293841
1375.5377637353083	44.62089567355264	207.87696265815424	385.01011130237003
1384.6909173574484	37.07312882450532	189.5706554138742	390.87360354323573
1388.5240381383164	36.67343135267319	172.9020365505714	391.6729984869
1388.0854306010253	40.000649622119084	165.05677839361954	393.7410351795422
1360.6097471275782	47.10557810603555	151.09799854493943	396.75871491060286
1341.124966757252	45.613175194573245	139.61938858293414	408.15154918397036
1303.3550562602964	41.21598954553167	139.8907435097449	416.9459204820535
1275.3212256390643	44.52162264400627	153.49145162433146	418.82804491067975
1251.4977029193324	75.58703350991061	157.3014583375396	400.53426190512664
1218.1267176322522	85.36296811193978	155.45542896975496	389.5558926938114
1207.75459874676	94.5835907253857	151.0519328424062	379.4972254330306
1178.9080324323354	109.95716825874746	143.47165352108985	405.8643058227017
1147.2653337544054	102.50616007402402	139.55209574605726	437.56756097487175
1120.482437071562	98.6005592137584	140.43584756251272	436.59842243719777
1089.1768378705308	115.08440636951866	150.35003495922246	412.41356329323594
1075.062776303065	159.26122938613688	152.72162684976473	384.3918234969074
1045.1805887943867	191.69239274617803	146.41052386476906	377.3455400288832
1048.4610218810246	211.89161375355764	131.80446836042546	385.218234000532
1025.079874584192	215.34696569993125	123.31016709815451	394.09512892376637
997.4860092733761	223.61938710301118	123.44849463363391	401.14288744024344
969.4502902496647	228.55626037066577	131.71996749168372	399.2358017698298
916.5751825733646	220.10266508281785	172.73550100538546	375.683816196214
861.2879644746744	241.02221120930238	223.89816296340695	333.84472394324496
883.5463210668597	543.8089805283823	258.0467060795451	313.8903155422064
824.2823027503438	324.3537504481022	313.6017453283853	276.00522407960045
788.9047837764358	314.15639922722903	375.07635455829393	259.2782116497168
666.5435517464274	240.81649430810222	400.9397884390316	266.6840931920657
487.71482031901274	224.5808082386089	350.63849240091565	309.6159463283073
495.22004856156934	232.39677610090644	304.44996836341505	335.55476734022875
532.8866797310733	260.24143962451694	309.72341376480955	360.47214803341
560.486375585707	249.7177417302704	317.8041831562638	392.06623733869003
570.3100397275878	249.70816515085852	309.32061319296815	414.4129071384451
609.9987968962728	243.714214198692	298.14689057964335	403.66621180142977
653.9603339239936	208.39700761199046	298.3910173350966	386.1334241639377
770.4996165694305	230.6696539133855	312.74070789053826	341.58813156114763
766.0678010169139	247.3224022320303	321.60433899557137	318.58452225352664
782.7155636091074	210.7561332757756	328.63555904961714	321.1452559987787
1007.8998987674271	298.7628846748065	348.96643220402825	298.6207347673637
995.1498291677415	299.0102165543178	374.4665714033995	298.12607100834106
847.5001092513795	246.8195858298331	352.51782042424253	317.90781490747565
846.4958301430097	254.8220497631004	354.52637864098205	301.90288704094104
914.8787153081048	270.61245011651886	414.0146677638735	280.6512473579506
899.2337583963642	261.70114174938533	456.1936852863723	276.6956566941824
816.4396458391572	264.3336894826751	472.87084329514823	271.4305612276029
868.0056257719936	263.243645570149	427.806214642567	273.61064905265505
829.3035758121976	258.57436491207915	428.35728136938997	282.94921036879475
