# Supplementary material
Source: ML conference proceedings conference paper supplement (https://proceedings.neurips.cc/paper_files/paper/2022/hash/1c8c87c36dc1e49e63555f95fa56b153-Abstract.html)
Supplement: Supplementary file 1 [file 1c8c87c36dc1e49e63555f95fa56b153-Supplemental-Conference.zip › GOT-10k-Results/VLT_SCAR/GOT-10k_Test_000038/GOT-10k_Test_000038_001.txt]

702.5	2.5	319.0	393.0
698.0151289375801	7.9663925858914695	315.7722937205961	381.06721482821706
702.0513117752871	16.908993996105835	307.69992804518216	374.1438121534132
705.3753707362962	17.149025474934064	301.05181012316405	373.66374919575674
707.4656416208004	25.202198024466554	296.8712683541554	368.1674521579346
711.7817381852547	22.492694392216094	288.239075225247	373.5864594224355
711.7154891521532	22.059650002162357	288.37157329145	374.45254820254297
715.6903984597797	21.587617456006228	290.8379000018772	375.39661329485523
717.586080113457	25.212227413558878	287.0465366945224	368.14739337974993
719.247135304945	26.088856826097413	283.7244263115464	366.39413455467286
720.3403396279175	26.352354653582694	281.5380176656015	365.8671388997023
728.3901800451692	26.39484672380223	275.6120476820837	365.7821547592632
735.6461659515203	27.84307610475318	271.1757872852755	362.8856959973613
736.6475049269509	30.965702173785047	269.1731093344141	356.6404438592976
737.2712765543085	34.77511544856367	267.92556607969897	349.02161730974035
736.6597490825143	38.407844497806934	269.1486210232873	341.7561592112538
739.5147316744071	41.747887380261545	263.4386558395016	335.0760734463446
741.5016371705284	44.62634403196009	259.46484484725914	329.3191601429475
738.7049451495518	42.95538295980779	255.80236844875293	323.40522184679276
738.163463513265	43.871540700468444	247.77949776213993	321.57290636547145
728.016327547713	44.347823834807855	232.2844401443831	320.62034009679263
733.1908257487237	44.092013296256255	221.9354437423618	321.13196117389583
737.4108433690416	43.60170003728095	213.495408501726	322.11258769184644
740.9164650908114	43.40538371904907	214.87546492728487	322.5052203283102
757.8391059935893	46.40110012565302	223.1309158451778	316.5137875151023
753.2706120408948	50.124780940936006	223.8014316604898	309.06642588453633
752.801822188771	53.03376234141385	224.73901136473762	303.24846308358065
752.4661410059782	54.245106018164535	217.1186225434547	300.8257757300793
756.5718852626749	66.27604936473318	208.90713403006131	301.15368097207045
759.2468200496406	73.38073387601315	203.55726445612976	302.9434029598656
773.4959433530738	78.36009278745817	198.87273746422153	300.9225916752949
772.9001145562812	89.08605407596528	200.06439505780668	295.130004449769
774.1737220014244	94.43069230398831	205.2795081495925	292.203055975795
782.1855878347661	98.1725020078311	197.0601929133971	292.5238529985975
785.7374451774178	102.48579215333731	189.9564782280935	291.57052768444754
790.7831766838012	107.4286327514923	179.86501521532682	289.22562004491215
807.7195628604001	111.16877968433056	168.00292569417115	289.082220456583
815.5995412007703	116.0206866785557	187.9168473166962	286.51318212878584
812.1586042615978	113.14547291938939	194.79872119504122	292.26360964711847
803.2055941232204	115.46365331079707	205.07295776721406	287.6272488643031
795.277703680674	115.81902726139137	213.19695729891424	286.9165009631145
794.8516131533534	115.61000555552641	214.04913835355546	287.3345443748444
787.5400664943813	113.36233380937938	220.79754021037672	283.95519640601583
782.6769103449626	115.81675499089567	222.5905621859535	279.04635404298324
784.0305675454429	112.13166724711454	219.883247784993	286.4165295305455
790.711878900571	107.44439746117669	206.5206250747368	287.83507389225474
797.1123495695684	106.23815746814896	193.7196837367419	290.2475538783102
798.2397625202077	106.92136300701421	183.8813200611238	288.8811428005797
793.1071007937178	107.58259192689141	194.1466435141037	287.5586849608253
794.038861237191	111.20766426567431	192.28312262715747	287.8587084698096
725.8909827356583	304.9919355615809	208.19896432679423	246.38242237535346
805.4400264600915	126.8170148025491	184.99734397217054	266.56731897607966
804.7940423838477	123.13654106587111	179.20712226133918	273.9282664494356
806.0135291302511	121.46167412377272	176.76814876853246	270.1810934301288
812.8376069292781	130.89855675370552	170.12002648296598	251.30732817026316
824.8115678429496	155.4085994235357	146.17210465562306	268.3451519874369
693.9797591416884	102.35922350408418	168.94306358865816	225.943062075037
741.9060926839338	108.53803323428633	166.12732293250775	201.18051909085398
743.9140394348964	110.3291851122006	156.33364280245215	191.82042870689514
748.7296960842287	105.45747376794068	146.7023295037874	179.66138596907962
744.5112628500999	106.25262328855163	139.7401067619714	167.80502745447524
744.9840543138237	101.2018955608824	143.6327102226276	163.39192374550254
741.2944045676686	104.78379852501578	155.84453943306633	161.06064753536435
739.8561493302846	111.64659224280902	158.72104990783436	167.29691553004744
739.9903757494178	114.59958658900193	158.45259706956801	176.79201813632292
740.706128603794	113.45356266661337	157.0210913608156	184.361533467952
738.3294060367946	110.12155408038561	145.65915955219893	185.6537583262023
731.2128325156445	111.8878666300026	133.85223798655593	187.3291469485569
723.0409449827024	110.95786025219533	145.15559640223765	184.14874305396887
723.3662226246744	111.36963379638922	144.5050411182937	183.3251959655811
716.9500236162323	114.44547217199934	157.33743913517785	182.32714314354087
710.9630885394694	113.69356597066894	163.96588113794354	183.83095554620166
706.54542897733	111.49876585902064	167.32631870568824	193.6954373260325
701.1397094853978	80.0604826227314	166.77457895462572	188.39293138904992
702.465863358267	114.17713852957175	158.53167295881966	192.83739682624775
693.0673995631615	109.62688634361774	155.22150495773116	201.93790119815577
692.580795374019	107.01656786866563	150.5821971867965	207.15853814806
682.0796835782281	107.46125370993855	154.73620605312846	206.26916646551416
680.3250678416241	110.7596237210824	152.57481284749576	205.34305112206695
679.0121135099317	116.50625677211536	149.5795549108512	205.09211822006
677.6905323608972	119.07189824682985	152.22271720892022	205.52908589172176
677.4410363903131	128.0090798218132	152.72170915008832	204.50941086533288
669.1656420957969	136.88577225391043	152.43983185406734	203.58869188619198
666.1411190447307	140.25034333612558	152.89661342455798	202.45181425340348
668.6375850780001	149.55083479680025	147.9036813580189	206.18050273791667
663.0545072495497	154.02830988444163	147.95540509012267	202.7827685250324
656.2233178399898	157.4100064489764	145.09816786433197	201.52591407759974
653.9450679516855	156.31373761645656	144.21413341879534	203.7184517426394
649.6417795800197	156.5035006175318	147.36152624598384	208.7981096566318
646.1730793295017	156.69260174837126	148.71101403258146	214.0078201093913
645.2445262552231	160.5557281507642	150.5681201811385	217.65940985297956
644.7484978776598	167.10803567602323	151.5601769362651	221.8790311973445
643.0549592039455	167.59768787188904	154.9472542836938	226.75453606447863
641.2477973028311	180.26374971906708	158.56157808592258	225.3600157879784
636.9749005286207	182.60367762518987	167.10737163434342	226.70324743948623
636.127218429401	188.97285354947496	174.98669899224882	226.33282190984815
634.5022251193532	199.03887347575622	190.8507802682842	212.50782938525555
632.9029305900473	202.6318289229809	200.3991840153417	205.32191849080618
624.5728782132347	203.64291774000276	191.5025242768243	209.6889319797981
618.363467757704	216.39385998868755	178.65593466663947	222.08516326429765
