# Supplementary material
Source: ML conference proceedings conference paper supplement (https://proceedings.neurips.cc/paper_files/paper/2022/hash/1c8c87c36dc1e49e63555f95fa56b153-Abstract.html)
Supplement: Supplementary file 1 [file 1c8c87c36dc1e49e63555f95fa56b153-Supplemental-Conference.zip › GOT-10k-Results/VLT_SCAR/GOT-10k_Test_000039/GOT-10k_Test_000039_001.txt]

626.5	272.5	188.0	54.0
631.3227003816841	269.3066743443461	170.03049469853204	55.72459904225789
625.3263144249919	279.9590681333086	168.2657368458511	61.93487099646376
625.6434023733411	293.665640151066	167.63156094915246	62.73931865668889
622.9221941173636	308.07526454971577	169.54135502125948	58.64842693832699
619.0787917941309	322.44576537631673	177.22815966772498	54.30832317567868
622.9556227376047	336.1427235660079	172.98993749838448	51.52248481954747
664.6174649876696	360.1901766256337	157.74238465179997	51.080870857777455
708.996767863524	367.19027678710074	158.00986523049733	56.15768903421608
733.2378734735444	365.5868148440487	158.66734637915746	62.640592411566956
707.6026382299145	365.6792420782048	165.7098008784864	59.053582867260054
628.8916399641898	397.6442901972723	189.02992947405357	53.57814701143276
582.099056196025	413.3534466871072	194.56598930867267	51.50953659899977
539.9258820229668	424.0735173579725	189.9232209911662	56.02455428415921
505.3124331549553	434.6876842611704	184.6114433383185	60.88475686386825
485.7970856749633	443.2754321436395	182.48762153289897	69.8984990405504
448.2792284180915	444.91033678923	191.65762697508788	70.50314322416669
446.8988619149964	442.6066978034397	194.4183599812781	75.11042119574718
443.82680108189624	431.25003562970863	200.56248164747845	68.84877457811945
446.4660968480998	423.99273406073206	199.3978745834401	66.90743984259673
466.48179097269133	423.05904010564973	195.92410051142855	68.77482775276141
460.608376665892	422.60437948493967	207.67092912502721	61.59120583862709
480.24278257033177	422.06909459889965	201.05301524903257	62.66177561070708
489.15551054215865	420.9733188898794	211.2799066713743	64.8533270287476
513.582035441247	420.3540454816208	204.35608372525576	70.2847965304705
535.8459958833856	424.8092680936794	214.35324755831329	65.56858859230209
543.3600972517945	420.9737012770541	229.07290027811027	68.99002858889351
553.5829235845036	420.4242864625588	253.84216844612175	70.08885821788405
591.6608057370995	420.8660993066285	246.17140124212665	74.09701803697311
605.1312541631936	414.6721259444114	228.94689750512663	91.34316131900124
620.9931098885803	407.8881791527528	212.0017568920985	95.0586743438217
621.1752174804524	388.9464919717232	202.143310297948	99.7122387694595
626.8169302197796	387.6640114591098	209.59871797826156	97.59249150494443
627.3147991321314	395.0860546894191	241.8990801791457	92.26157648020809
619.2878670284629	409.06106778257845	252.82417296258353	95.08417883728497
618.3272296134465	411.9149384103475	260.08167807858916	94.71266786772
612.6143113205087	413.37607795466766	276.94098037032626	91.7903887790796
627.756019442542	390.0315188397011	291.62399584647	93.51307528880254
650.7235384446835	365.1802693818652	286.71676722610334	102.18776482055799
641.1774480822538	362.0847731793615	276.0607958997284	108.37875722556528
652.7786998408793	340.5442496464025	282.40048859537984	104.19229035083958
649.3930815617651	326.002760195301	289.17172515360807	121.42695285246697
646.278820662209	320.4626450276852	289.07046488354337	107.18805491099027
624.4455122982604	320.08565368660504	284.1472385949348	107.94203759315066
605.623735078845	317.5056318114163	273.6569053557852	113.10208134352811
588.605770272806	316.7750461313108	265.98651562001805	114.56325270373918
544.8281660015105	315.2337500406903	265.44514449649546	111.7727395739058
525.1849100630787	308.4972099574961	252.38857316918546	119.42992160649709
517.9519849138775	301.4919038034509	255.33230899667814	116.15736220822299
496.9642082833192	305.1240441938072	262.8278080742346	103.14640573025032
456.2727987637183	303.06052082578054	293.5896592760113	90.39979652049536
477.23666039090955	316.4608650332956	304.1462200652185	86.92545656928293
522.0373003793436	337.3374550216974	309.20627142446244	92.5029422605354
509.28871930975856	370.36864050350687	322.52010625392245	87.35720784546774
532.6819503626162	369.7237886457973	312.83443069747074	88.64691156088696
533.0594888776133	394.1732064235894	306.0082422771177	88.31696712817472
613.6666425405158	411.93708109039267	299.97719687283455	88.60073977645786
714.4418981121994	391.6314308163247	310.4178647481116	87.9915332931908
857.1229702382396	370.6379977383824	332.3186338476019	87.80505840082063
833.5248364572645	340.1477006086209	335.2063587139514	85.4877345237714
806.139269672934	302.5087878870834	352.01796662880434	84.84650865923001
835.474745506596	294.82647115908196	385.05014691144834	93.66091840452083
752.7251664153525	275.23947071524844	378.2022833652783	118.47266748146654
708.9400625489071	311.96825291501625	375.1778504655793	112.96108355637315
633.353734454632	320.588628699748	393.0648129732322	110.5298535070093
637.2113849135744	332.0679645360662	392.96171183832183	118.01998096627098
584.7031598114604	317.5276458128551	428.22570890935083	108.34925556091608
524.0415408058007	306.76886880925406	420.4947091533685	105.669139986749
479.2261372014465	276.53232121949833	399.43394407323996	110.79644902184202
427.7758416611754	258.2909708037913	409.85050107272303	108.74413565281489
419.3656742572284	265.84532754538435	387.5952335233014	117.08078358401818
330.42508984748775	296.0991775126847	366.3969441929063	117.8283015416871
303.0631261749068	311.21317459275	354.78963349061075	117.0808576248709
228.53777159820748	335.6812445875004	345.6285523844439	125.6762777297577
208.34225483212128	340.7720926412262	335.4989752635872	115.49458162230603
196.65072501236966	368.4439340690924	338.2187671168309	108.36519026784592
262.89682742659693	361.3421397861656	307.66577246243196	122.5687788336995
293.6878973364179	329.8758899546246	292.4007610486948	132.5674174614618
317.18081744093655	304.183074888895	291.4260030713483	137.9419653612301
307.3994298124137	321.42437795430783	284.3774928412655	150.0291088328793
335.5922206602323	282.5802363941623	275.3032529230403	173.64728706469958
283.600565934032	304.983519718161	280.94174065788195	178.01313127548156
259.12855503691094	306.7566137224861	293.97550238706054	174.4669432668313
224.051656639135	333.4926101493115	290.9614720249044	172.21242942357628
186.8917500635552	352.88815525401276	292.94230709302815	176.82472606399512
146.9092896040248	378.8254629938725	292.1541550513021	183.67961819212064
170.46850544276836	383.0422244130858	289.7033693556496	182.6907030173331
158.13492842397596	385.2848268887841	284.8049134295501	178.20549806593664
175.30893354371548	386.6949828510009	286.67205020650766	175.385186141503
168.60547611039928	389.1747277481636	285.6318923598199	170.4256963471775
226.91426387555512	370.1050758962275	283.00616218716226	158.6935677070761
240.72672356082973	376.9605311571629	296.7013552547768	144.98265718520528
303.55506545129833	335.6966192294168	280.68141294537344	145.2829249370472
259.24838500247057	341.12852756385894	269.9522184879256	141.04194529183647
277.4000575817412	310.8571368909272	252.82565446633436	150.44664360583369
302.94687622705067	299.1399683789987	264.72575355792833	129.78536516214163
343.1153906955376	324.75316673223296	263.96486706093447	121.40766053873922
357.2149986894524	341.74834761453155	247.693944310115	129.16632510367756
376.14758243500387	339.4151444312487	215.6897418980962	145.5546616284114
400.2065128934686	325.6292794969048	195.88198307413114	144.8162894041348
