# Supplementary material
Source: ML conference proceedings conference paper supplement (https://proceedings.neurips.cc/paper_files/paper/2022/hash/1c8c87c36dc1e49e63555f95fa56b153-Abstract.html)
Supplement: Supplementary file 1 [file 1c8c87c36dc1e49e63555f95fa56b153-Supplemental-Conference.zip › GOT-10k-Results/VLT_SCAR/GOT-10k_Test_000040/GOT-10k_Test_000040_001.txt]

829.5	357.5	356.0	324.0
832.994280830892	359.5500325550728	348.01143833821595	318.8999348898544
835.232765060716	377.86115085055746	343.53446987856785	303.27777735970466
846.69003379526	384.43789447028155	330.801018729559	300.3053764403355
871.8568202452439	373.80259280866653	320.21057471723816	321.57597976356556
877.6097426118259	371.0241916268903	308.70472998407394	327.13278212711805
880.3936805922945	392.2008924202722	293.1247162653166	324.82793157163474
886.6579182862198	396.1203671400355	280.59624087746596	326.71731761429066
893.1943240092867	396.57898780466405	267.5234294313324	325.8000762850336
881.5546719677534	391.1605090768631	244.14071956240178	327.3046309502362
885.5050191178526	350.0765865544037	227.26474242275845	337.67021327959617
893.4472284825024	328.38729164885007	211.38032369345893	354.48668907340743
934.1162469725308	323.10541822965615	191.92061967443018	356.21067406021984
971.06019187164	320.1422638385478	169.23975892038783	353.6024780017405
996.9879491278381	310.99161295850877	149.80326316834612	371.9037797618187
1002.5120859401553	303.1281284833056	146.78256429703274	387.630748712225
1030.236048421583	300.8376086264795	140.53165753423542	392.2117884258772
1031.390588490183	289.2696135633401	138.22257739703556	399.0432837743957
1051.049102731374	292.0284573988165	148.15263939865227	418.1491413454424
1064.7273016721888	305.0220403702796	155.44037486067447	400.82300873842905
1065.2456096811636	308.1391040483163	171.49239162543228	394.58888138235574
1073.0514729170811	306.7403520833452	182.10028619594186	406.12625899307943
1066.295904047819	321.56487230872375	195.61142393446585	412.85284293346456
1058.8086637916838	320.816539532342	210.5859044467366	414.34950848622805
1054.4571201440679	321.5395262191781	228.99882964036414	412.9035351125559
1026.4958959761757	321.65071235810865	214.89017477508713	432.6900494635695
1003.4995314961419	323.5506770378788	250.83002166891202	438.94300217027194
993.8011222819847	343.7049819744956	270.2268400972264	430.91771017464544
952.4246271031851	330.7200857938465	287.1663621611649	445.91859115366685
936.8491467263964	323.9494159042155	295.3637800268883	459.45993093292884
919.5416378021441	355.0638945008918	306.3456886976788	444.49719209500523
913.7723020070702	359.11652446172945	317.8843602878267	436.39193217332996
893.2136796062445	353.3912948060624	335.31828897231327	447.84239148466406
883.2005299352584	351.4048211932981	343.0432160155501	451.8153387101926
832.2355151223928	360.99366778934865	345.06826776725666	445.1257677523446
828.7704022408266	360.9973506877109	351.99849353038906	445.11840195562013
821.3170293897076	360.09186822857987	354.3736496294183	446.92936687388215
813.5788024063813	370.914319514312	357.2522208906381	437.8823470078504
806.4494888617295	374.7023031307953	359.0051490941971	430.3063797748838
794.1455878409246	372.9891323339251	358.77811626654125	433.7327213686242
761.451575002832	362.4066896633339	349.3670046044014	454.8976067098066
764.9925545165901	367.99524315735016	342.2850455768853	456.35879674634884
755.855483241385	374.536958003501	335.46928158188314	443.2753670540471
740.6684059763634	373.4224586646787	329.14059129373254	445.5043657316918
734.9980439939029	378.0725339807693	316.15196376997426	436.2042150995105
736.3800299210708	376.01221862653836	301.57763304593846	428.5144869382723
725.3367215579458	362.8768040427452	300.75627600987184	443.3313292247003
722.5016740063675	360.86033534989383	294.76235737862794	447.36426661040304
679.4031154565976	365.7117531158055	299.5837796913425	437.66143107857977
681.919668940895	357.7798330415468	294.55067272274744	441.96612877264334
678.6973572280797	345.5190795094152	289.45483426621365	466.4876358369065
657.5523643508118	346.9603845004793	284.4539721877671	475.427737813024
658.8591189233791	358.4245431584547	281.8404630426322	464.3712061269981
662.2051929761355	370.2425518302436	275.1483149371195	487.3877580801271
664.9469535123276	375.5007791585866	269.6647938647354	488.7628907826436
673.2281967385939	361.6460782494469	264.92079910705047	492.83530921122815
677.7177688771246	350.49151216283417	255.9416548299888	503.34698919506155
690.0655262111968	338.90722429790935	243.04368517524944	526.5155649249111
687.0379185952715	360.1339786930964	249.09890040709996	519.7972207163591
674.1014980371245	351.30983977657587	251.1326993504247	537.4454985494002
670.1415029227959	367.4551312736411	246.8404813634764	566.2159566332982
669.6412161991009	368.6256449777883	247.84105481086647	576.4295834813868
714.8145549613437	367.52766392781666	233.81542317786244	565.905371266083
706.799494851415	369.13334045400586	249.84554339771967	562.6940182137046
736.2995878995655	389.79709732981325	291.2977135698443	533.9230489956431
719.4509103898927	449.763013904561	324.9950685891898	491.117690979136
712.475402319904	463.4613267672837	313.3752217047879	463.72106525369054
733.5554569390031	470.2742616562534	319.9364850480075	450.0951954757512
726.460622418138	476.503067517627	334.12615408973767	449.72068069473164
709.6969732995749	491.1845009538778	355.343010149202	432.6682559998919
661.6280345145977	494.06277821965307	377.1128027982307	426.91170146834133
609.1913819044436	512.617809246521	380.74026710786194	427.7688297561094
624.3782783084805	551.6333495947645	337.6394335813036	451.55407480749784
674.9829346844205	546.4973307909879	335.59679494985716	461.82611241505117
733.1249299885051	549.5790555668	319.46036651437794	468.1811081350131
1182.375053340796	415.79939706635554	297.6966063735955	513.4692031901501
1188.5332679535231	360.14148523181905	285.3801771481412	536.1595948760526
1193.8344925270192	338.6891815107929	261.99167421537817	553.4920947465628
1159.4405897375652	346.65183264310343	229.69561238411956	562.8377593344832
1170.8957511934598	370.19470629599675	218.98735392993206	540.1561409438996
1157.399075821768	372.5898934559937	245.98070467331553	523.6812844081495
1092.2417932422534	390.6061965347657	292.8427249433104	523.4140546316205
1134.2336647320833	393.43927485729796	310.66363933778405	530.4734801583227
1177.6137165417115	385.18156448110676	302.699692563643	533.8562081031857
1193.8584354413156	371.0127623626209	283.25802338300855	536.09827510301
1216.384099971159	393.9346481384065	263.70416663575463	553.9981843325204
1225.5475480239074	403.24903686597924	245.37727053025742	573.3875337573028
1236.1676249790723	376.67104023427976	224.137116619928	601.278302437586
1246.6969384622676	335.6812826711024	203.07848965353722	582.018535644886
1245.5718126008635	325.9911637526474	193.33045219002952	565.4039059228486
1239.404942799619	344.86222606002275	194.08035941049047	527.6617813080979
1174.1881288640898	307.5319993250607	213.9304426064448	480.6803356354076
1165.0289526902889	349.7106727065179	232.24879495404707	439.2638140529252
1163.824709396095	307.25374391819537	245.1059002295517	440.588722132632
1211.1815325220432	301.0859088117604	267.9610618577708	442.23631890185516
1157.7458786604338	265.2570649310626	241.63587771707876	447.29576073129545
1163.4574756485301	242.3465383761906	230.21268374088658	450.20568223989255
1160.604302459886	244.51183546044894	235.91903011817487	435.30078126122055
1126.8962197596124	208.12091814756326	251.06941700713503	434.91052597077044
1089.043230403619	210.07126561872406	262.5429465882921	431.00983102844884
1047.8830586869299	213.89216781171518	268.9746243557961	423.3680266424666
1012.1280466088353	206.64679547276018	275.4743700549944	416.1886785013796
1010.9222254108415	205.12879833872003	277.88601245098187	419.2246727694599
1002.4218496640138	211.6159307419506	283.96519864654164	417.17197326109454
973.6908716827546	202.2108440159982	286.4691575470504	435.98214671299934
964.8725865630632	193.0166312013178	292.7896153891527	431.73834754779887
955.8459715155602	191.84183694332785	299.48553285317524	434.0879360637788
929.7733773653213	204.6571221852068	294.1126350542296	442.96821723967525
933.1608268514212	226.5131819026081	287.33773608202966	433.9008300061662
923.6576490233565	220.21471770948466	306.344091738159	423.8991436912887
