# Supplementary material
Source: ML conference proceedings conference paper supplement (https://proceedings.neurips.cc/paper_files/paper/2022/hash/1c8c87c36dc1e49e63555f95fa56b153-Abstract.html)
Supplement: Supplementary file 1 [file 1c8c87c36dc1e49e63555f95fa56b153-Supplemental-Conference.zip › GOT-10k-Results/VLT_SCAR/GOT-10k_Test_000041/GOT-10k_Test_000041_001.txt]

917.5	405.5	34.0	42.0
915.0326880543397	406.14729219992415	33.15385766492442	40.90060715675078
915.5870276023333	405.737256944079	29.7159471306907	41.7206776684411
915.8741480197104	405.53467758989	28.020698298267142	42.1258363768191
916.6891134392685	404.70894730215423	26.390767459151192	42.67822451612267
917.014454626025	403.75597398095505	24.659971546630487	42.42394408050536
912.5371046316247	407.51006647533615	25.237559926886227	41.198592798151665
908.4463820124208	413.7041981358546	25.109702631947002	37.11963201046197
905.4404637408902	412.3057209612648	23.31820998118514	36.990337911957866
902.165466739166	411.96457576122157	23.262865495395694	37.672628312044324
896.5089935795099	407.11546769747434	27.90563309764604	37.84201770087887
890.9894317399828	410.54185029993647	31.717706271218596	38.21630300143637
882.4967319591908	408.5493438919482	32.20110186291254	35.60051422945702
878.8503518960849	408.8475049018342	30.95461059586485	35.004192209684945
869.8205009342647	405.4257182002687	32.40260425909884	40.80953384654051
863.7395499258937	403.7915571046149	35.35614497574485	41.77576571282411
852.5189682634411	406.5226592672276	39.59295530965534	36.313561387598725
847.3096795814366	405.7581329433396	36.86544052982025	36.647514749570774
841.8074428901785	399.2778159974407	36.293083278403245	40.34668413422191
835.8764069032558	399.3129800006442	37.29662512853269	43.89586616905361
823.0530021295921	400.92522161794784	39.94725371642514	40.6713829344463
813.4942447480032	398.29728695453383	40.021188097748094	37.04024808307541
803.4854299504374	397.17468308756753	40.62539507799697	39.28545581700806
793.7354981365962	396.22784706969355	41.249343191041866	41.17912785275603
772.3157692130258	399.56596782544483	47.74239190613384	40.99331654340497
764.0305623583483	398.3940797841934	43.366777281861744	41.940690736999315
747.7852059990753	398.4786679854887	44.95980144167666	37.74138104413944
739.8190174292183	403.8974082374924	42.6762187722087	36.01188044472293
741.2109929429263	396.8717414702249	39.89226774479293	38.92057411004281
743.6401712362915	397.3207975780043	35.03391115806254	40.504708959796616
741.3511204733641	402.15821004801046	34.8567952451738	39.151514537585406
743.1222261712882	397.39258264814174	33.64457283450126	41.69280238179552
743.893620949178	401.94603510886856	32.10178327872181	42.063670718195
741.5021245894181	403.6697928371167	28.72751558796775	43.27744692471225
737.6805734726875	403.6312488593904	28.473679760437967	39.97013285402578
737.5440099289987	407.96035243380106	27.672759537594033	39.90430418697756
733.6427793419734	409.1152895912941	24.87683427595652	38.6542685155604
725.9787862214058	409.2220297035034	25.285956440597257	36.45160641427582
720.1885768380238	413.09715546364896	26.215495819953922	36.447448993917206
715.5683138836849	414.08015653211845	28.57135589133346	34.48144685697824
712.0943030970984	414.5296473109574	28.57631239978027	33.58246529930038
709.2969030471689	413.45146026133375	26.34643735443735	35.738839398547626
701.7538710676081	408.8544486420087	27.783623745234188	39.08334367934412
701.0097335439359	408.05168192099717	29.271898792578416	39.639619638772615
698.2634392082472	412.60569612300077	32.60019567858192	38.106612483574125
696.1978857580401	412.7826451495003	32.28070824234598	37.752714430575104
691.371085779694	415.53707102856396	27.60770254134001	39.95818879582372
689.982189313374	410.25502488085755	26.147189728630174	43.10524603687403
692.0098826380085	411.878177947871	24.2565717196399	43.106092863265644
690.9674885486619	417.17918007802734	26.34135989833313	40.90724998402385
696.2701462099909	417.278498938098	26.264088596109712	39.6558078618392
698.901781190607	417.7732368247772	29.262733143759924	37.63359277487044
714.1984914182453	422.4607040624662	31.263379023114034	35.61860876215083
723.3640204566461	421.4798671167101	35.03904668700379	36.52758142791583
736.157612094494	421.67309128728743	36.49920499979288	35.01416052057441
743.7663274661536	422.2576372807792	40.426052689540626	33.8450685335909
762.6480793661423	427.93623274160404	48.23309371927621	31.83568167957455
776.217348213386	429.5896255437829	49.94340633047148	33.5460874327269
797.3331147228704	429.10764887433515	48.27352543424749	35.8184811626787
812.7685067192014	430.7853626738998	47.777626864411346	36.42499514043987
831.1000527619315	436.4492868731015	53.45082534673765	34.358210303739604
853.4169910211203	437.0217412440046	50.05564413362383	37.337171092459755
876.6526046687538	440.21015441081033	47.50814075337085	40.568659365257666
891.7751925722213	444.1096871126805	50.52599332353121	39.699391540078864
915.0564547508914	452.6510422531711	55.02272029724665	38.21811916580906
930.0397757403273	456.3726775833256	51.37901908958868	36.62439089910326
954.3888396503514	461.305755080127	51.015971294482235	36.425251910488655
964.291710966019	461.9814582922276	54.53807308564792	35.07384548628751
987.7720244155337	467.17682286706844	46.85764664453065	37.30889505522039
1001.1735901337355	466.743778463588	46.52097774153009	36.85166073551119
1012.8801642481111	465.01650765644064	45.390504020757625	41.61694790909874
1019.3828658488623	472.73768608799355	44.71396581302436	39.87332992795834
1034.4760672218204	471.4326619679288	35.83217083084906	42.483378168087874
1038.4224114539197	467.7798935251707	31.636092177516883	43.62789870216026
1044.0645260963747	470.8100183924266	25.077833224661447	44.656604465730254
1036.6846133837005	473.4759787847574	23.528076653757722	41.4992946139024
1025.0327902526728	473.86157224396106	24.518680376896214	39.71387848918065
1014.6114880381414	473.3105663841215	22.25927203070049	39.81145487080508
997.8168315087959	471.1509717046952	22.947735300158385	43.162972177033076
986.8449514750779	474.63008377611357	28.429519850195092	42.37798885322128
973.2968582329798	476.7044008480185	28.89394359202579	38.229354709411396
965.3778522731752	474.9945218610572	28.914442001931125	41.64911268333404
959.4162725146641	474.2796560956928	30.877267820344276	44.18554795835273
954.7305315843172	476.24965832980564	37.89387417825982	40.245543490127034
944.3244507374061	479.2360382454936	42.71080101928928	36.73358902071929
942.8505649821427	477.8019066736736	40.65774379353236	39.60185216435922
940.9745911872615	474.335810582269	40.617981484179936	46.5340443471685
940.8237112791435	471.5900464769785	40.91974130041585	50.653890478749446
940.0248223648672	474.9399963863696	42.517519128968345	49.714255195391246
942.0758172865994	475.4124505183298	42.769618426975775	48.76934693147092
