# Supplementary material
Source: ML conference proceedings conference paper supplement (https://proceedings.neurips.cc/paper_files/paper/2022/hash/1c8c87c36dc1e49e63555f95fa56b153-Abstract.html)
Supplement: Supplementary file 1 [file 1c8c87c36dc1e49e63555f95fa56b153-Supplemental-Conference.zip › GOT-10k-Results/VLT_SCAR/GOT-10k_Test_000042/GOT-10k_Test_000042_001.txt]

867.5	757.5	71.0	53.0
882.4458906095091	769.4380969416995	73.21751403852035	53.44267896060098
920.6875453488813	794.250906668616	100.13942673231003	45.576860768752795
903.8983074687915	797.8424173313292	97.65121142357671	56.42718497778298
842.0341257900425	791.8612983174862	98.74387086868975	73.19866629615049
790.433293969046	779.7474507895115	96.63479872688845	83.92498496956216
726.5688651474815	728.2195569145985	116.37907628812101	84.67959158917066
698.0571689630154	675.3161803595003	126.05609889107376	92.637180516343
789.7331279470011	645.1414224673389	138.43768762057906	98.04395757856729
819.9835535120856	577.6153446260639	133.5945381448538	121.78070995223013
890.2782604833238	525.665475360866	145.78722076393868	125.16591127107216
920.1702256612127	561.206859356262	175.5449370394573	118.04146230263478
993.4027985769164	600.1010154071969	157.91292308428143	113.87208270146868
1016.1415523753013	602.4767136015473	146.56347515257787	113.38669377090116
1084.8743096174676	628.7049775100303	143.91483309103836	114.0398429689752
1133.5458986070585	611.8861412577672	143.90273548789202	119.28928369715763
1167.2578935241088	612.9780760396862	163.42341975551003	112.96519155704716
1194.2863103018935	619.3710159890775	148.37623288582364	113.18252722022568
1229.797619848777	606.4289368401952	126.67005314886106	139.06668551799012
1217.320533820214	607.7549106960477	126.52207331080218	136.41473780628533
1159.826416871135	624.996221307431	125.59018280574472	130.91214768432226
1066.4147647959442	601.7109162835898	138.72834237599767	133.05167423476252
978.4650248045493	634.95980372915	151.99668196096485	126.4706352796818
915.7387918214783	638.5366459816812	150.40874336933817	128.07835798550008
877.4375663467266	641.9972015588563	156.8976340976551	129.92144185879823
859.9033199754479	643.2461649660092	151.35957938772015	127.42351504449243
813.3673037908266	620.7535746270466	178.6380484043344	128.54632015399875
850.0382399066757	642.2135826490921	163.1534912425692	119.37640456736861
887.227159492633	640.9503066748244	186.36582627069583	121.9029565159039
905.2084912400351	652.7097930371604	189.0273080341477	112.86803826307815
897.6983121143526	647.3192403071549	175.74995362463508	128.36542916656865
876.3324842331072	623.6434648967008	180.28430552460117	137.51967612495207
893.0647312002843	645.0751516393068	171.78704380412609	129.61042773917114
905.480005963813	659.8974570913722	151.69127866259132	133.1093075336975
951.3263751964945	644.7377013376799	172.06507444358505	123.08486671239382
972.9513407648045	658.9676013257445	161.23916001356366	122.41708105620634
980.3670669244815	641.9296533652746	168.69048705044065	120.84053000717626
955.9045540580503	639.3337403303924	190.35181318453846	121.48840614381322
933.6612498956581	657.7495716443123	161.6257815185583	118.82264217833038
909.0486650531597	638.155021594151	175.62189501950928	122.78268609460696
896.3989563240609	640.6893442655592	163.47466874599922	117.71404075179056
847.341381949729	631.9669841868864	160.0796694141897	117.50482211253203
794.1912556723472	636.0392692936301	166.13359180028644	105.00171580475484
764.9007387436731	647.9170870465905	152.5899434216635	98.21659376612163
691.6025419501354	644.2842849332619	149.98175683345923	105.4821979927788
697.3811089539678	662.2015485240914	166.47898931228295	97.70203729760811
733.9470873967032	638.5336026815215	171.7207722439049	116.16339326066091
817.9547095602918	614.5933436469845	184.20367744633486	127.94428142381378
952.5759007337865	611.0731485168974	179.32990243746454	134.98467168398798
1009.5390855263664	590.6941964490005	193.77865163016014	141.18004384112825
1056.6040966584062	592.7141014341682	220.59771649929013	137.14023387079283
1071.532075643342	591.4172682611744	190.7417585294183	139.73390021678054
1099.4685913741841	553.2177049928529	212.701028642364	143.48954528376868
1120.618302631882	575.0639785483445	209.48095539260532	144.4591116192273
1141.0375766872899	573.5700841310967	196.39388523260226	147.44690045372303
1130.2609688253162	557.9906197615633	228.74926496070057	140.79825517826131
1126.8704919296617	583.2073753831506	195.082158734786	136.59109824048508
1061.6482007481738	576.6742917894995	185.04962397506762	134.04869685859907
981.8377831331204	591.1269398436218	189.38840060163955	115.16159807961469
934.9807058165491	592.5982528443873	173.61525198092946	112.2189720780839
926.4105605883044	570.1973747024964	186.2802514566555	125.69369149652351
961.6418138232393	589.8992327890542	184.274369830533	130.29780558010262
1007.0310356876003	599.2477899470799	207.01535131442103	141.2144543629929
1040.353388252137	591.7366899682373	227.72110135201416	134.39904052901142
1082.7316385710064	594.7656590931995	188.20570968007098	133.9962408998117
1095.7673929333223	591.9694664922081	197.52662588834337	139.58862610179443
1102.5373935145344	613.30475338593	189.27588871202147	139.23216420316786
1115.652204536662	613.1811814406643	163.04626666776602	134.32098160809875
1059.44047040248	597.8625027211284	167.88761791032186	132.2159556045333
1041.7870645612081	616.5470637423465	165.4529375794774	127.87063907381194
987.5229282956371	591.0840961496801	186.39538401529055	132.6987710510769
1010.5549308809643	597.3286063247338	205.4260950567446	120.20975070096954
1052.5598645102252	614.3214283500708	172.25658295622958	121.81235526090016
1083.66771453234	592.7054352236967	183.86395036241387	128.1328077884416
1124.3695811321088	619.8242709148668	170.97200141531874	122.83212515784595
1130.6551784867218	617.900625173815	158.4008067060928	126.67941663994944
1094.4230983561974	620.5757969910823	190.5224783961669	121.32907300541501
1033.0841123770808	642.379368850095	161.89773155333432	126.52925793289478
936.5555057832934	639.1438733474769	182.67769898018818	133.0002489381311
912.8925096947426	662.3942305237696	180.44475750452813	136.0584682383074
921.541274329857	656.9838241612847	163.1472282342993	136.93521238165442
978.0452457365858	639.4494392401295	191.77523986848948	134.23439437125845
1024.934791910614	670.849187143125	159.3638932939869	137.9166231532843
1110.223014027742	666.0391087853841	152.53621105487525	138.17970775475771
1232.0924249989414	692.6528282207157	155.94500062601506	121.56672984906325
1308.7638310979717	694.7234089685762	137.82021923072202	121.7874403147219
1441.7910813289943	657.5240964813429	157.81092045571734	130.80430490357946
1502.8606382935109	686.9215880648214	162.7958481295908	126.49105385215366
1544.1362439454215	690.0152109159205	152.99218201624976	124.85052972436061
1473.5338442227596	692.2367440992367	189.32031212551803	116.03760213539252
1406.909701808195	688.8826084080638	169.79930805992745	108.42375268385837
1337.3102011342855	546.8246116363796	191.42055337666417	87.70852688738287
1424.4556904466617	555.1829770608783	215.8133073176814	70.99179603838536
1345.8406165340486	558.0901985758935	193.86138567443697	69.54764738563487
1222.4656940605666	621.6428731835484	190.68738191218398	67.40422252493367
1326.5234936133293	646.0898627166519	223.32716790854363	57.978339377068544
1436.490983890867	496.9403038926922	198.17311782366107	85.2779015881981
1258.0648475119556	512.8625730097909	200.70006825787198	84.05407022147315
1356.9199430804736	561.3699064834865	196.11684236513494	83.60288589623148
1486.50200979262	579.4297094916433	204.48432809129503	82.00348880255714
