# Supplementary material
Source: ML conference proceedings conference paper supplement (https://proceedings.neurips.cc/paper_files/paper/2022/hash/1c8c87c36dc1e49e63555f95fa56b153-Abstract.html)
Supplement: Supplementary file 1 [file 1c8c87c36dc1e49e63555f95fa56b153-Supplemental-Conference.zip › GOT-10k-Results/VLT_SCAR/GOT-10k_Test_000043/GOT-10k_Test_000043_001.txt]

686.5	478.5	226.0	170.0
663.6933579113255	455.74279850992923	227.06900032505305	177.19073110674498
625.0004340641783	456.3287901230718	253.62149498954216	195.0812552666369
593.1274096690632	459.5926579779558	253.907332382307	188.55351955686888
551.6713199067433	430.0802290558488	239.53548203632255	198.93636246577063
531.2792627975672	420.06599042031246	238.93360916690494	205.16951070758665
583.7017227655174	429.16089160661096	231.93041832926104	186.97970833498962
670.9089661136845	400.9932717418732	202.44111129834317	190.61488273158642
754.4821950202288	375.2735992070426	177.64528032031694	192.54096629339978
849.6233959239948	372.32973387211985	168.0471434029	175.11459826774666
905.2643910593613	344.87098187041465	143.22651925734448	170.5899130600975
967.9353121508543	310.6131528627692	106.75593384415896	174.92077451942134
1011.6359370468781	302.49244143923204	94.21014073166637	160.3393622631496
1042.4490732806105	294.91747339516934	92.20424069183284	147.66645788504707
1076.2582386571282	272.45067639250703	80.86834997469595	162.58275053789245
1086.8035846902271	271.50605882356894	86.23415044978572	164.47198567576868
1087.0946976052116	279.05061774548665	85.6519246198166	149.3828678319332
1087.5151746083275	261.7819383254785	73.80949106953793	154.5829478878239
1078.5449479540503	258.6583526611762	63.42953125955401	160.83011921642859
1052.2046883797543	270.3292628516152	60.952152321874095	137.48829883555044
1028.3473627952592	264.36973123350174	56.53821605447716	134.0754245904871
994.8733102102834	263.3414309445086	50.01015588787435	156.70535146270856
965.8557053906688	283.9178474585929	51.433769270212565	143.85831656298546
943.8197261292459	279.4997744903104	50.68391270178596	152.6944624995504
930.2613893146728	277.9641960384622	46.796065478726405	168.16742774412913
914.9757738505551	291.6117090253184	51.38686577629288	150.61506325691758
905.4492280722545	290.82698326741706	48.85413448804113	149.1008257948842
892.2007602343147	291.9359020460418	51.224570625048514	152.91461312235276
886.8827893119942	313.46921305377094	55.63355759720385	134.7558105968366
886.1102820091018	308.94178448976334	51.312940662197406	143.81066772485173
885.1429749351894	323.67130469557014	50.26230514105016	138.23362466501476
882.5665805222513	344.55040418742715	55.41509396692623	122.4538271242536
874.3789445634325	345.0679253921031	49.78318332883215	129.67147817330107
874.9939055272843	349.6608061013558	48.553261401128566	125.99603741913577
875.77687366342	349.11202813922034	46.987325128856945	119.05263849233873
876.2456806642524	337.05925708026234	40.94473297287906	125.29075707015906
873.946607489444	337.78108161585374	40.47840688198265	121.31487177871959
874.813824386777	334.5599490277533	43.67825446840446	108.02001143056893
885.44181809271	328.226481169107	43.43376065218608	111.34850554979593
899.3724704455252	331.2349409104037	46.48817824606333	105.3315860672026
910.9281355037858	333.88993614193754	46.83222030421263	97.67605838666779
916.7390588923371	335.2965562947952	48.65175219825942	94.86281808095252
920.6519317729268	336.80629514512714	47.51777282456411	91.84334038028857
929.7770143157329	331.8658608165382	46.601470920436704	90.89054454903857
932.5011733123005	327.71190775873083	45.427073954822234	97.06149015089309
938.6264947972405	325.84549078948714	50.8306247867176	100.79432408938042
944.316237874146	326.04581049224396	60.64759483710047	100.39368468386678
953.9367878222939	326.4966564215724	76.64027829333745	99.49199282520986
973.4945855230551	325.90777584038807	79.04309493106034	95.13396571567921
990.2292874782314	320.94334285487497	86.67396209491362	99.58279554347794
1001.6583757857982	320.04693643222197	96.06135706778929	101.37560838878389
1013.2640397091357	321.2657525218132	97.7217249339474	98.9379762096014
1018.2560748024465	319.3180737658184	87.73765474732559	99.73634536102702
1010.256624710456	317.347871441186	80.12987988772689	103.67675001029178
988.5019746793575	330.8451091411927	77.42080433621832	99.79146241713114
994.5622368832986	324.3266552020672	65.30027992833617	96.11729168942745
999.9916696675273	315.5473018276367	54.44141435987878	95.96319177345201
1000.3302141468142	306.7674553265447	42.03480846113452	97.10156105939772
991.9887554032156	307.1297137904165	41.53537561924541	92.08145654938241
989.9838898520497	306.77381673355063	45.545106721576914	84.52837375697445
989.5064479927549	299.0657129420808	44.47471849126361	93.8687654932049
987.2383775935896	299.21513481065887	49.010859289594336	95.71356244072442
984.6995093738955	310.15056471032995	51.83933395468855	89.58753506143975
980.0070342379655	310.9411351977397	54.60246733705427	88.00639408662032
976.5729198554297	303.90738030172287	57.0099893288012	93.15249033200423
974.3881443432782	303.52258179373945	59.03196358702721	93.92208734797109
971.4371759204932	308.8729061947538	64.93390043259696	90.40045992595189
958.9811680983419	308.3482969070195	75.21804970301787	91.44967850142044
951.8425425466575	300.18733498270467	89.49530080638667	94.66372732173727
944.397032266407	306.95215305223473	101.48646474110335	95.6333743115981
934.1051431145765	308.56217518912763	109.6546138581393	95.51723733446856
933.5103968351971	307.9877530132768	110.84410641689837	96.66608168617012
937.39321649294	309.059043548736	112.87637566001962	97.78947013478758
938.3327699110322	312.2161174550374	110.99726882383547	98.10621195201685
941.3270308585711	315.3407659677149	111.59155375683349	98.43972175473797
943.2120036196882	321.10942761399565	111.12756582297061	96.82027122728988
941.1573417004992	321.90636387746815	111.96405889389857	98.4992294677952
928.1607734864431	322.6002017585027	114.76839114812594	97.11155370572612
908.8323927301741	334.46153064551004	126.75479830015453	90.05786740702976
882.8204020424024	339.2959818484718	127.74692019911764	83.7910889662116
860.9679665041526	341.6720854071972	118.43933027109051	79.03888184876082
837.0678128477442	334.1844105660262	116.72956060322014	84.73109209722398
824.6701862836437	334.9645890204777	113.06152019405641	86.33332335913931
814.4520169101352	343.97201144125734	108.43373465178388	90.24958727070847
809.0490361507576	361.966527201261	97.36054260023818	94.8932695241172
824.4633149235373	384.0794986342644	90.7524391196877	99.10823478812816
826.3599203833899	407.7027579044934	83.97002031226397	96.69983456344875
822.5579507810932	416.0250646858885	63.13967544664136	102.8026482568314
800.9987245971338	422.4618631779717	75.12369347929382	105.49626844029817
776.5949489036917	435.51980634854687	78.5818506876627	99.22074205224828
755.6962125372527	434.48964674626905	72.85886840007983	101.28106125680395
723.8293632025593	438.36903268078754	79.19507072128337	104.45514583504001
697.070204835668	450.7770435921474	86.54887625937151	99.83609766043668
658.6711680312641	445.77907416143387	78.28034470694396	106.8987053094072
622.0030068895408	455.3829716097504	84.74448506702726	108.04331360684114
582.2747521824808	471.5759333702613	94.49994271556697	99.90123417819515
540.2527114033005	477.8322634893108	83.64867102808915	96.57199522195151
506.1076975545742	490.16406035894875	86.70389281268653	91.7624728474577
504.64653649420745	488.34124977328065	98.05684997685216	84.16724729421773
537.8391285718836	476.84673267134355	103.3613159789856	75.61283542879808
