# Supplementary material
Source: ML conference proceedings conference paper supplement (https://proceedings.neurips.cc/paper_files/paper/2022/hash/1c8c87c36dc1e49e63555f95fa56b153-Abstract.html)
Supplement: Supplementary file 1 [file 1c8c87c36dc1e49e63555f95fa56b153-Supplemental-Conference.zip › GOT-10k-Results/VLT_SCAR/GOT-10k_Test_000044/GOT-10k_Test_000044_001.txt]

497.5	444.5	87.0	131.0
524.7414867855935	411.9538083751787	79.33464758513756	143.859217725009
563.7198277768439	397.23192363610303	77.89286660005902	155.91323697647357
589.4815991245473	399.0890288981289	77.19455770771827	155.829400295498
604.048325481623	394.0846167892888	76.99755276669751	154.9870565982542
631.8684435780699	391.98601692536397	78.97842488097774	155.58293705690556
670.9309677912387	387.7996102803624	81.02795398444785	160.31145136828107
683.8426933965619	394.86496156953547	81.44749410406365	172.4237401201973
675.925909431247	394.79853496816196	77.61470330288469	172.55659332294434
672.2422984286266	382.6989908336008	77.24566980314648	177.41504282961884
671.967171185679	384.07783983592265	77.79592428904155	178.58942371544683
655.6356537323215	385.92257196122813	78.78860946562781	170.94116574856977
624.550848730938	387.71052822986167	79.11448284460458	171.23048675028966
599.851161384288	409.93433262152826	78.13698126294031	177.1597542419205
571.7755659169533	483.97177928446376	75.12682878870837	190.7925329003802
559.4291880475294	567.018297854768	79.38223299011764	159.58601590686578
639.2156548348331	608.6513931687122	123.85446479092181	124.54868254952923
623.3780715585752	498.41181284358834	124.2347771926193	125.96386414404813
679.5020252506919	540.9762321097612	94.72923359755308	159.03840245336954
687.5892435600995	459.64564804737796	90.44718718001484	167.0984979615345
655.4193753652318	395.611250282103	106.65878260042794	166.8255842405576
595.8589720589061	356.2005862134043	131.60408961661312	155.7521173086011
539.707525310127	347.70544337331626	139.9171249789269	132.05071937063798
493.72022959425885	330.1822007625744	137.6764905745785	132.83712246990908
462.9882678028581	303.28369135165985	135.2421170564967	144.03527655781588
491.3494551120332	270.63984655662557	135.68755657865682	138.96257951341016
504.0990990126798	246.562334661051	144.78924572045995	122.24077153625353
587.2027475393235	212.2396807168858	142.4383955475527	127.86436908597611
568.4106448478638	202.6284673251402	141.7258969469474	147.08679586946732
559.4573577454983	240.34039595036575	145.98836466250054	144.4315065612981
510.08740751540006	257.9620091706672	139.53719356802736	136.62942922191337
491.87582007569154	258.780456856777	136.8191847944068	139.34155425558689
443.0534195588572	253.7926962236426	125.74041920835157	140.6191901922777
443.34305726969	281.62539750276227	129.3541469150312	131.07682204583577
408.90616119094756	300.4504480068545	128.50664367245295	122.13548973179493
390.4546075117064	286.14549471898397	133.83533984576587	123.1177865205127
427.0284498265383	287.4186715774907	145.6457980562028	116.5258069539706
442.4246843047325	300.22361417275795	151.95416231448988	123.89444017648098
459.676328214126	306.1314001070679	147.82002581590226	138.10956943946044
500.30441267711376	322.04747807051245	147.60307993206442	142.2948459757437
521.7373944735405	344.7685098573746	164.08381063192397	133.37382504368884
509.17409074367174	320.7863851396088	156.46353035779177	139.23493310710228
512.6668340193177	314.32877059803843	149.4780438064999	138.18608530216483
525.0677525608618	319.4063544870313	160.91037579422184	128.03091752417907
582.6685057790593	332.70981586729886	154.7381228622801	115.05265145170065
616.8732964658252	328.23884784676267	141.4117078896092	119.75742084655295
615.2960949360395	345.09909281696383	148.67547480411005	118.91184174558484
587.4070623837856	374.4698754055431	141.3417671373523	119.07459782160743
575.1052153385754	385.84512249516126	124.97250706216093	125.00517155829937
544.6837404533906	412.25159178909206	134.63892431079748	131.2420781878224
513.2701790792315	443.04023298392093	130.4737754977484	124.09601644177526
497.5923725635196	426.53807487494043	129.76012007724495	121.02240565131801
494.0883383017906	393.2107133499745	136.76818860070279	128.44615197779098
494.7693272742074	379.3578338802046	135.40621065586927	126.91928291170566
489.2807264954115	356.9741685994506	142.25284261527128	126.25034789312534
474.2249957441554	352.52218355399907	168.13778525722222	122.4747614023448
460.53560651148695	368.7662073303122	159.01712463196813	121.9237230539857
443.7552437556369	344.5277965474708	161.67555246385183	135.0836329855927
449.87164621786405	349.0879102112542	186.79218761509154	130.63208566748767
452.48756338554745	345.99772833510093	171.60193368088898	136.8124494197942
463.9743517011739	342.26514648671923	172.87429845348328	139.42842483578823
478.1307691993824	349.24691852383523	183.8502406097376	125.46488076155616
494.3533718237925	349.1175862387407	175.65184324673345	140.2716300632348
511.36101533732864	349.4441229721075	181.37549247234972	139.61855659650115
498.0187091999303	354.2556823050867	177.79418393341058	140.08407820178815
496.29015473896476	349.21213137327356	171.25700710403058	145.17403718975874
469.65158170264016	345.9790865063502	189.6816291529755	146.66119492021915
432.90947249662145	342.5060142608443	183.87743138345087	153.60733941123087
414.7172938891779	326.744067752457	177.78679996555138	158.58436453251392
388.39326000251344	333.7864594602037	203.9597409442004	149.79460647595658
389.7475507328881	339.18497187717105	190.14198983333756	150.10675129213547
425.8482474850756	328.864632637944	182.1281974611277	149.35156272653447
486.11915142505984	346.37739532611465	207.57194921045112	145.6086572707557
530.2940172300206	341.0918993505841	191.24817487212243	156.17964922181687
574.6464706427832	337.22810851737756	189.97257839503652	158.44289899145235
632.2605149225183	351.59719911904557	200.81297248754828	151.62967129280878
657.9577459364185	345.48202297587324	182.63901348421527	163.86002357915342
635.7381744958886	343.2819418577183	199.80478671446497	168.26018581546327
587.2611002033088	345.2832644280238	192.52139440913896	170.04851516876818
540.4085520527893	342.8384739151991	177.79311581183697	174.9380961944176
505.79369845956313	346.55257410896456	202.5846090247477	167.50989580688668
486.644612982693	353.0203662734755	188.4873655520975	160.39602419190823
486.82214262314915	347.76409955458604	177.1527616009805	165.41878529458484
475.226969269505	357.23613765896613	200.34310830826882	162.65681790163717
460.23537090216143	362.97154609551296	184.655687447053	156.89482822803126
444.10657100069	359.1266064686233	173.91884913722953	159.21040271771483
436.5167979499097	362.0851858090218	199.58809808488678	153.29324403691788
414.83100619164503	363.1409146030976	181.9622840826154	151.18178644876625
398.7121114990472	345.7842618159748	172.27397719343952	154.45051981723321
383.042667127451	396.7825762339356	198.46951260813523	124.46083758026289
326.32128383851125	366.5681173774243	180.55978979528373	139.4215858888016
308.4660059269569	357.2787506158873	171.01245268784294	152.97166464181453
317.9666950661165	376.68467690550955	192.8121477558575	149.86075124061213
327.6921504042033	379.4159448840604	173.3612370796839	149.7840307757625
352.5483650446348	377.7717368516248	164.33292336821052	153.07244684063383
380.36425633732216	393.1571118215692	183.6669905767169	147.29031349870536
371.67557047109113	391.82829832123105	164.6160161532555	144.74389104853543
389.0443929824273	377.64161962928995	159.09414771095283	143.90147185204788
399.19557551877017	399.01249616321013	176.95246062492794	134.55031202253565
394.5418217418468	396.783221542323	156.89488572451944	139.00886126430987
