# Supplementary material
Source: ML conference proceedings conference paper supplement (https://proceedings.neurips.cc/paper_files/paper/2022/hash/1c8c87c36dc1e49e63555f95fa56b153-Abstract.html)
Supplement: Supplementary file 1 [file 1c8c87c36dc1e49e63555f95fa56b153-Supplemental-Conference.zip › GOT-10k-Results/VLT_SCAR/GOT-10k_Test_000045/GOT-10k_Test_000045_001.txt]

1074.5	626.5	22.0	40.0
1085.4387906528236	638.1067617565052	22.30728658434097	37.039272052812116
1101.732224954629	648.0282346118354	19.39608776196617	36.67098463608781
1113.9104940072086	654.6936532832581	21.211716660156323	36.426230794917295
1123.4759981069355	660.7167325468919	22.774813877943537	31.578021977994197
1137.2639188710878	677.3435628183508	20.793137970253802	33.303054449916644
1145.1232678595682	685.2458870774967	24.536915343487028	35.2684921209327
1154.2645388560588	693.8161261216619	26.890792458490203	32.198299788046135
1163.6465321908922	709.737725908135	24.859569143780078	32.89102896084879
1168.4784003107563	713.2058416523181	29.71194265443613	35.027366066472815
1175.2960276686108	731.2633515897298	31.356546089117	30.49071970245486
1181.6651816683252	746.4033545160626	28.35772637924198	33.324974034273545
1185.0533047434462	755.7923443472781	31.287413958238922	30.07648833862433
1191.6187007781075	770.8108801947994	32.65132627784728	31.92776629922956
1199.423220823593	788.6121575482415	31.279972939899046	33.95338372533509
1204.7420663804992	803.868693757938	33.99433818833024	32.19858654769793
1207.4752026586773	811.31991511881	36.86656450753547	31.88851685818586
1216.3856528761337	806.0663387226197	35.27637595539651	32.657242520902024
1225.285675020342	787.5978222444793	32.45103921387215	38.5752384157617
1226.6707043000513	766.5199214771582	37.503369315170566	36.03167617487954
1226.2593566518215	740.2138264115848	37.1680903804054	35.37705166968327
1227.771777482795	718.3616798340718	34.14324871845817	34.52945556891744
1229.9764739811642	700.2754957527792	29.733855721719763	36.09524342820559
1230.8033459118026	689.3834325241688	28.080111860443033	34.0636077870524
1239.8043922260945	677.4155024962638	26.695629773266447	32.58429877953448
1244.7095334177382	667.414863716701	27.141637100020958	36.734946786777016
1242.4493389243644	666.5374459560512	30.65893580664512	30.465060067090953
1251.4037627587797	667.235167807116	28.15139056446127	30.032197766626634
1248.2099495624361	670.6905934365042	29.042073199069257	30.45060485195565
1237.570715634418	664.6111993036492	29.710348820011294	31.367470080341818
1234.181461861253	669.2309656076977	29.756488010356044	29.82207273622832
1220.3367647827847	672.7137941028934	29.298534897039012	28.485885199887722
1204.860542866427	668.0214947477833	30.222022520004767	29.68076858017607
1192.0334882268376	670.3180666404511	28.519230796380505	32.634356105958716
1174.4063195431147	669.0482746933839	27.198440754343594	36.13644335297428
1154.1528546514041	669.2030554872707	29.89865125197824	36.821795430615914
1137.6886336006655	669.6571658238594	31.348074454232332	35.9135747574386
1125.8238189734882	669.5280114344437	28.611994397054747	38.28914028119257
1103.8475901026202	671.5393746083357	29.481566756334544	34.266413933408586
1087.0374194244212	673.6331369855093	28.99317677779073	31.08208715950078
1072.1459368414273	676.7783226583041	28.506568945653417	30.467260751059634
1048.005824276414	676.5492511478824	31.285717560694124	29.996810373638098
1040.2954409977885	676.2719505019546	31.266071073708265	30.55141166549361
1024.599996018356	679.0603000925861	32.47885159523862	34.70958649627399
1005.4638607413477	671.7801715487586	30.54940838669222	32.342806210218015
1009.0200661277627	667.2257586060582	30.369292934345673	33.5290088722096
994.5523471322277	670.8930473938896	28.119820481582778	34.242150120761664
993.5194811306847	656.5511983631114	30.18555248466887	32.5181222105453
1009.9577857706379	650.6725072366288	35.81319936642883	29.46617517056187
1033.8487287120129	631.3212952955538	34.237589753536454	32.2303841761558
1063.8641284477078	624.9073303335886	30.724293053168033	36.68535072660192
1097.6583076869135	608.3039107095645	34.19151236567295	37.01572860870338
1125.5259961594463	594.5595125307349	27.786882918265242	38.717997865314196
1168.5781682532463	568.1057166979434	30.403681937295357	34.21779098543067
1149.1419853206169	546.7816632403312	34.69064431636594	29.056663669747554
1148.2805704334548	529.654300813149	38.41930200378696	25.200658175273922
1139.4773677016499	518.0602404025494	41.07868801131657	23.477079903005865
1114.9029368443385	516.1390439071956	42.89221897969469	24.29806880352767
1082.8532973338074	511.8568795947082	42.01943849809327	26.57477876695447
1071.3607948951874	477.45060298462516	39.24388592773962	28.839225247502924
1101.5181369471554	465.7007074059603	39.86450099473164	27.75108866919484
1121.4096736231697	456.0891106742367	38.260576704648024	28.945239520056948
1095.3890270335876	427.5989078059556	41.7344011456283	25.74421660278273
1111.4114197407807	406.7457385984184	36.068868116688876	28.40926148739606
1125.7030922942101	368.98766888258916	32.82579459183246	33.98625135272819
1153.5841242577071	383.3850622937537	33.8781310713762	31.494427681573825
1168.5892545519444	386.58084140188885	33.71809253746819	32.30809547847474
1131.8403139529737	388.38396242562203	36.51479519636676	30.781299858627285
1114.914936137539	361.83904599877843	29.071609514834712	35.16545834384044
1088.0884467831177	358.6556134248741	28.159275783442048	37.49044849607607
1101.8351011712132	374.04675217336745	37.7906000705608	29.395446760000922
1096.591660035298	375.8291626166623	39.82963442917968	24.77464488425984
1071.418844349876	366.0689349680161	37.631321020714005	27.11727208062401
1048.5910929897318	362.4307682936783	36.53718468711172	27.279529921098984
1036.946360353354	358.9978906173159	36.77281854588296	27.12890180000265
1066.187393792357	349.4808444741554	34.484353461898834	29.104222113138444
1088.9244514237396	347.7753232714727	33.03216857300225	28.51327084815216
1058.3019493612614	342.20044570346937	34.22607080899911	28.04023207016664
1027.7475297352257	358.8513422205177	43.428764118160146	23.139915118039767
1039.46590466572	358.33632968373473	46.93013626322276	22.09777696037102
995.8545352415638	357.021623185886	49.67628247024936	22.588542041099135
995.7106134516714	354.36461412204034	41.02122424744408	27.90256016879047
955.9460491119798	354.9009053428009	40.59427874283536	33.31290266110646
955.1797420697151	328.31262420739165	40.964413200693265	29.52796322501745
987.9089526933664	338.18417393916945	42.99991473567868	29.70110327098937
970.7958474746122	315.4510728006138	40.74295326252455	32.983638026396974
950.0481467888884	326.8828858059349	42.81739334478966	34.468252812014455
941.2143682550978	332.8430651964386	41.03983054588734	37.13173393086987
937.1669273612562	342.3482908611304	41.750730783997504	37.81190006701443
938.9238500616665	347.626895268535	41.994598105749304	38.527829419921716
952.1929668961992	381.8498288247202	40.811882017055524	36.00630801651765
966.3775606027007	364.02396012074496	40.25299160652783	35.38374498645714
985.1675254482865	367.9112721049194	38.38843663644965	38.32373343443621
1008.4980629666885	402.9101726923526	41.25804968174933	34.7695382233678
1035.0139686132072	377.72771225394183	40.85878671350116	34.894299335617745
1071.5074456420919	401.2526787735169	44.162212122097955	34.33381628378448
1114.7623847430757	385.5398415507095	45.24738435010521	37.383629322505925
1161.6074432919745	366.5401022943587	46.4427986554405	37.68885563396301
1207.0294951854937	311.36101475169085	44.24731344824007	47.4903887481394
1251.7971293281423	267.310454030083	50.04657155147399	48.923758929054216
