# Supplementary material
Source: ML conference proceedings conference paper supplement (https://proceedings.neurips.cc/paper_files/paper/2022/hash/1c8c87c36dc1e49e63555f95fa56b153-Abstract.html)
Supplement: Supplementary file 1 [file 1c8c87c36dc1e49e63555f95fa56b153-Supplemental-Conference.zip › GOT-10k-Results/VLT_SCAR/GOT-10k_Test_000046/GOT-10k_Test_000046_001.txt]

1234.5	716.5	99.0	117.0
1164.7205744365694	715.0137476734517	91.4181582511115	108.77664235943965
1073.280461651424	721.489145769702	101.06434485243403	111.57439516411796
1001.9556696216248	721.9806250584575	96.41870064301301	103.89619893801519
925.2929593584098	736.5635446598036	88.88931330999573	99.9624864583735
856.4520756751077	741.4158058228877	95.76938845702777	93.23072986446817
782.0636200728923	764.3002950250293	86.80172706179764	92.10644181857964
724.3574982386741	762.8176682933439	100.79686446959936	86.62026976023095
620.9597232654432	773.3240091446	101.13866608524793	86.25296289080015
553.7088611043442	775.5967691130741	111.79412234093684	84.6561636221023
452.782083115181	782.4229429748169	106.86445403309706	83.34908302017863
394.4006987736367	790.679405173464	107.02655823044162	87.76448301776142
314.62374245000825	784.726953598934	104.19781702725902	96.6055625092661
271.28943289191136	786.9943607916407	102.33903720983494	95.23244094291033
230.21086278226093	756.0430545995414	97.3921358976284	101.13959805685434
218.64502215810805	728.3760005983472	98.63940389047487	90.82046629286481
219.6409963363319	703.0378925082415	108.57939445131524	78.85400315731368
210.0260700274626	693.630256039025	104.2699471477695	91.78445111542554
191.28761173206613	676.5760102791021	110.8878113727514	79.6043640865548
198.45138673139226	680.8647666397865	96.56026137409913	82.98583728510786
221.4127093115484	668.6545774395673	109.97262593978206	79.15144914935786
249.65759198811188	674.4101945068658	106.91456264249287	79.51392658272503
330.61258719733445	687.3697075756863	103.11351164218125	77.01844702554818
394.27812759820955	703.3350445555801	105.928963157556	67.72195259917366
483.39802419008504	731.8879405654502	101.6451203602706	67.69545679999244
547.132893713517	741.9166918647347	114.80286365344917	60.90469781840858
640.6236129623984	739.8970740964835	97.3485715836371	70.412550981619
688.2279760222654	711.6331112225089	102.20828955352664	66.37273425426969
722.0059943992808	688.5540417984093	92.72744266394619	70.29437138286845
724.4399541948028	650.5776431595895	103.22665557257069	74.53388366205468
747.8764779585492	621.5292264837841	92.62681647945735	71.24528735548466
759.8524604186838	608.2441378850842	84.12584438994082	74.63897530675526
728.3396811883078	603.0547654147344	89.67170666742601	65.02478244457973
712.4834854435525	616.0801544012056	80.10090974083668	75.40034719172549
702.8069486667242	620.6067265209924	82.3140705065975	73.6928798612501
704.1033800157692	634.4395733159512	77.26534345544633	63.218236742762
700.5935643499187	680.048572734934	79.86582842011684	55.96401887837344
671.5706243600999	685.7624699556766	71.85823657179616	63.71303883855368
680.6299217665279	698.2791277542831	72.945796332399	53.61784346514187
668.0041643025141	706.3988110253844	70.37497986442249	53.27695200637032
686.5969116376556	747.1519211046071	62.32870916757207	61.131018699783766
716.4276971149571	765.1717535054371	60.99388254374166	54.25472606351012
742.5734250355823	747.9428562541831	50.42817157227981	63.314241080059915
772.2723782563112	737.5078716576626	50.045584112350156	68.08912327813873
783.9372002738519	797.7207113140072	50.83036974950144	64.52568006934683
772.5152642794691	755.2549201211062	44.659406212720555	73.29331920058952
790.9077364831217	695.1953515157602	44.750245762009285	77.2537369480108
721.6715822129897	662.6330234263668	49.92853505053556	79.53978405097833
753.6684385662343	613.1914935850303	50.75068063491187	75.12256958258499
808.2340995605032	669.3074541609946	54.07721101590289	75.34850080018563
746.9434666692366	610.2389957738204	50.71746092102737	85.82616206642628
734.6653770957556	589.1789864268786	47.55180372579388	93.82699756991548
713.7245996361854	606.1889945542118	52.0942269106907	88.36043499437673
693.9599651067324	600.3519788509435	56.529517951646696	95.64771914866957
668.273189805122	614.5406195781659	50.864308549626564	100.54304769728202
645.5406067367737	616.0352740956384	63.40060865868314	83.4413675076341
630.6420770946314	612.376585493852	58.59144293381435	90.75874471120721
620.8988221914678	628.3187380634852	61.70989893681178	84.59566697717301
675.324759592925	648.2884164600246	72.30029851994689	72.21991196549035
729.747037701672	679.8042931216523	70.42345301306695	63.809968366803844
724.8899488403831	702.8775590758139	71.68454817769177	59.92884924824568
748.8894722815223	720.7349772100731	73.3795156492762	55.2727719508913
676.9709190640842	653.2333493059872	73.72579485094188	69.0161737591667
691.1703077997064	656.8917664430907	79.04100407203053	63.94693859778197
715.6746584955924	629.0347426076391	63.76190130117112	70.19090829134669
725.3474475780446	615.6229255592336	59.17852219989667	75.92568658297199
743.9456721479617	607.3983686360032	53.83509682357518	75.38652108889276
786.7922003761842	624.7205087349219	63.45326196735806	58.993325878333124
822.1780370745887	564.2880772293603	50.52077613214527	79.60359711602214
860.8376624735678	548.3035160338229	54.656214258304985	70.84537504503804
918.4279233268697	543.3712889619209	61.75753665337821	64.93152672410947
950.888537788676	571.1870195821135	60.67460597859416	71.14341691227698
1008.7405308944519	529.8772609997187	56.97942203656578	77.01616215165248
1035.2520692204112	509.731926474927	54.45859691195154	79.4301425557577
1024.8691592513042	529.0640669047191	54.23145797738426	74.35459589262344
991.8403987726963	549.5895197919999	55.68838584012286	67.62275519950248
930.5390300174636	531.8254114542824	56.094263154917826	72.11684865064036
885.9580919866411	513.1503466056422	60.62079924189972	63.1190540760816
816.5256311505009	524.6821208470129	63.08653378979891	71.23246265034145
767.6338700928839	539.9653620559036	57.26998878116848	74.49457357912824
710.1968409690882	582.782070647132	62.4024922876234	69.61437592316824
673.0548558705505	575.9211880877224	57.71371816238184	75.02322058700668
630.9684131701732	561.6124926473575	52.19301633478689	84.86753507110504
601.3479288149567	572.6777798983366	47.14262025654656	88.4535064846163
611.5801195160317	606.829812312043	47.78275293963068	91.9047895469995
679.5053228854358	614.1266007281372	66.1583011264321	75.13901616656304
629.9459666149165	619.8618277854873	62.97160206893426	81.46080754726046
602.0970598782594	597.4341893775859	66.4625852059123	74.10925402672714
578.9393647535092	597.1386402505204	66.30684883665995	63.63579832401203
572.8476563250767	595.1353447870488	64.16663597832887	57.411225168672345
575.7992784089672	587.525979109405	71.6605024222219	51.577354134186805
597.4833655978601	589.9427642344937	70.84693680333905	50.61238468027351
640.7314203073314	592.4430924620049	73.93742772424667	47.51782610482214
663.5509057722154	595.2120669306149	72.02915362640525	47.68388110220116
703.3635390939897	596.4301108998611	65.54734841900793	47.12326653386655
680.0446009843105	578.3273497739511	57.364828785887944	56.802790792551775
634.7491714238728	527.0142211579958	50.86855749967566	64.1398274397281
613.7391984828381	551.2644413671942	53.10945547914167	57.22657346496217
667.5652192551892	576.3287126300332	54.90560134772958	55.74166978963545
676.6376403699129	559.8447314897811	50.70047331686122	60.83020367298125
