# Supplementary material
Source: ML conference proceedings conference paper supplement (https://proceedings.neurips.cc/paper_files/paper/2022/hash/1c8c87c36dc1e49e63555f95fa56b153-Abstract.html)
Supplement: Supplementary file 1 [file 1c8c87c36dc1e49e63555f95fa56b153-Supplemental-Conference.zip › GOT-10k-Results/VLT_SCAR/GOT-10k_Test_000047/GOT-10k_Test_000047_001.txt]

985.5	643.5	92.0	78.0
941.8564754992663	628.3579669463737	98.04020433382856	91.23469717372473
890.8008500144326	643.1714002317003	104.78424297779077	88.429859069676
841.5425666801838	646.406329969018	106.0203121301693	81.9599995950407
749.536318664269	634.6022144104335	139.36598150490397	78.97996718448718
742.6005890178685	633.6971076592545	125.99355804320281	77.3846953425326
682.8156973918703	633.5979187421013	159.7072540597856	71.22336301125249
701.461450377422	629.5005851356627	154.53980088194152	75.84869102487862
720.0146353085753	624.778878662652	171.05640675327913	74.56750882417123
736.8356408051355	609.5975589626572	179.1345940006923	78.3809311620032
813.6912494223653	596.8832818319689	164.61861847920596	83.92445089295505
814.6623790064828	598.4407250563928	189.71138956429775	80.80956444410728
911.0139824773476	584.0248444235737	159.75445191034328	84.60343812701107
932.4361073410994	571.6330802382963	185.3531663495259	78.96787131237164
1036.655373810779	556.0186900334897	156.31920006304617	81.65501611811754
1041.269756312192	556.7895500493695	184.1026788886776	80.1132960863582
1122.3535033660407	540.3159815199449	160.6388437872058	80.42427808491894
1131.5903545769547	539.0631795533342	183.34208213844374	82.92988201814047
1196.4679000022325	527.9804083773872	152.42008785367776	84.50519591882838
1204.6475834945968	522.0912308599837	165.60140391586944	96.28355095363534
1224.8391054108397	526.5516336059071	157.92152499006158	87.36274546178859
1177.290023010344	527.7750589079106	168.92291140550577	84.91589485778145
1121.659964682046	541.2101369174767	157.97006370356482	81.6998609725596
1069.3147544315307	544.3973817738986	147.1468979165384	79.05161597868548
992.2516144237127	553.8649096071376	146.322923804466	81.24614042053126
952.1989630141652	551.0218840937312	134.20772450522065	86.93219144734427
884.4924604355879	561.5493065238021	138.04321045305403	90.11531065207744
864.5059576207192	557.5402575512203	124.41860821185948	94.56023473917892
805.8134359305442	566.5738850933765	142.03025167493018	86.81436585320569
774.3808802914308	564.978972233857	122.61215851812432	90.00419157224479
680.6489334383429	583.765407572737	146.49297670113486	75.80033168350843
619.5881980776047	584.7374696750619	140.7371154311666	73.85620747885854
498.06214802699367	598.526113532852	146.78141234697114	69.64588627451667
402.3625210120874	604.0528561106273	140.30939318104203	78.71490347785512
300.9146502494286	597.2800369947149	131.4792647074693	88.84560832260098
223.29391665726854	577.8887209110595	131.31749971941818	100.00099921482355
125.7380266405526	579.2126897686369	126.53422505997915	93.71860595979848
79.15252357463528	570.0328833837619	133.23246423268367	98.24257601608743
61.570980777689236	567.7802014759046	121.14250348068917	113.65248898854519
61.63028137211887	556.1724865494549	117.32681372615451	122.0795645787429
103.72770496520441	583.841261384553	119.84181583586238	89.36197559442826
178.52269098672747	581.874940090953	108.25521886553362	76.86564495868595
259.9694996801819	553.5967871323943	122.5539708918842	86.94526381658754
330.32147074905635	552.6286701285098	126.4896763593155	85.594233106057
294.09880216197695	504.4717938337497	122.47508439204992	105.44805655415291
260.49073495261723	503.0730069598941	150.23602304345553	108.2456303018641
151.5314138493053	495.4027599503062	149.0697992367685	119.52899717264539
89.69907437403816	497.17575034761467	146.02942029676427	120.20651830771288
53.35790765918584	501.22408252056204	147.51985630183106	112.10985396181825
40.64994693309286	500.47567569604007	140.3026658472253	113.60666761086219
74.14245395368589	496.7289172468435	165.15764386470212	117.10714137627
114.60219361721386	499.73510388692534	159.5308860880674	111.09476809610629
246.60220694371415	507.3062133586864	133.23529339865144	108.68671525777617
310.3974717443917	501.75842326635666	150.23053319789696	100.75785210025157
428.07480620090433	488.6035317746726	131.2090159625228	95.60099483959758
518.5067938651548	481.6863888524554	110.58057730084433	105.87449098032482
620.1903902099277	474.67255043451047	111.7257734182235	96.04238912207359
688.1264729822941	465.63088728177723	109.90754828757284	107.58649882197514
799.5298145224598	452.7835489756093	106.30434324967342	102.45568633459419
868.2408191248144	452.0515723806889	97.091708066029	94.05737998435288
948.6252764851229	433.21635771575706	77.79876422213604	110.65692003470464
971.0681085077988	430.75743188519994	80.2172126154876	86.0097014216293
964.9179581297384	429.2975576247207	74.19606823810788	88.92944994258774
965.7335775039336	425.3211327108141	72.56482948971748	96.88229977040096
967.4312472668475	419.63883299760505	69.16948996388975	86.95425803113596
961.1589091546444	413.3525396855229	69.44091427734975	94.61754389092175
953.8600639196997	413.97829264885104	63.430757148391464	88.21407606455354
945.1588555831609	413.3142103704937	59.41208348875317	89.54224062126823
929.4326540076949	405.4417901798886	62.859976461329424	81.94998918718187
924.0330739881845	407.3989318615128	60.00606106342029	82.58673096957685
911.5410608004051	404.8217018183562	67.08204191647121	85.50268536557651
902.1204739808786	405.23499416858004	71.53205050170126	82.27757315615841
907.1987279011481	414.249514748936	68.6377043808271	86.03501715444114
907.5449672366068	415.1397134632972	84.96877654884497	81.82268389158516
932.9143107772016	430.65053002090013	73.62789476027886	82.31929501047823
947.0277195794546	437.91505930914747	72.40506001371196	94.79421929192246
956.5579219266281	446.9351120386241	71.73471360235149	84.63556738282057
958.8420710509388	455.6568303604459	67.16641535373007	86.87555513385722
954.5831737605263	456.1287913371585	75.68420993455514	85.93163318043207
956.309132840965	457.9654311397701	69.68843974044948	84.80220560843718
937.4807329573742	457.41695811303526	87.9051496987401	85.89915166190677
948.7133784230629	452.553831713185	84.59906901614008	81.94025428390934
965.8708044059325	448.15887852287085	92.24554421627452	90.73016066453766
998.5436013348618	443.1419150474397	93.17404689685257	74.8307454916638
1050.2384984683774	439.1381736933936	92.81442685608724	85.48002753889102
1079.290747364375	435.8829863166536	102.0825538904495	69.53286068358521
1148.4181607822993	443.28470712630883	92.9681164234258	78.94324207092937
1171.731210892006	435.64311483213334	108.55729755344765	75.29134103119138
1244.0040732349398	444.9221153137863	99.53047816110822	79.80038777742207
1314.4430839134905	429.8396953571271	94.00438432998922	95.86606857345073
1319.1689423015891	457.4319768960743	102.49296719072322	85.53225458788432
1376.3741280723762	445.8645167632498	97.52911012057234	82.04504971183552
1396.2412877883132	460.5574200517461	108.65037212508702	72.43641369343857
1413.1418696536246	460.54869098538836	114.57376694251063	75.29134029387157
1432.4489002778655	471.93978382191744	126.51702302212917	79.27479320627828
1447.4114059168942	478.70716484406955	125.56658152300542	85.05641101459632
1439.2403530266697	494.71655174541803	145.21021155352756	76.14830696241127
1457.6543076024777	500.62494599742814	129.04201194046922	78.10465815076293
1429.2422778943815	497.5618311716147	153.492052237211	84.23088780238987
1434.0623142222728	512.3032588064336	147.5557116649298	84.37788920076423
