# Supplementary material
Source: ML conference proceedings conference paper supplement (https://proceedings.neurips.cc/paper_files/paper/2022/hash/1c8c87c36dc1e49e63555f95fa56b153-Abstract.html)
Supplement: Supplementary file 1 [file 1c8c87c36dc1e49e63555f95fa56b153-Supplemental-Conference.zip › GOT-10k-Results/VLT_SCAR/GOT-10k_Test_000048/GOT-10k_Test_000048_001.txt]

1510.5	494.5	196.0	216.0
1465.3449150775944	466.8555807914862	181.529729429675	237.8574507872974
1391.4016592571083	429.752514390652	184.4447491964445	259.3466774528922
1345.2687104948325	408.06245677358254	214.03544256555404	260.9433232500698
1321.955718763078	399.66346298692605	223.30714671912415	217.97446392748063
1339.9989187928686	431.20981405250564	215.01750604219023	231.32285009860044
1377.2572929049102	456.01164848795565	196.72323255550734	230.91384662292586
1384.488980876525	452.07699333322057	195.71797440162072	218.5959802483817
1398.1973471307801	439.3008974846032	213.95623533582045	218.0596042640678
1386.4835089177884	436.02725293150775	237.38391176180414	224.60689337025866
1345.0895833478296	445.5463822552446	283.798012336846	205.56863472278485
1356.1577462792477	472.40562885564964	292.3893046971126	205.62347341240417
1406.5549396846795	497.6689198578234	246.2852666355974	209.78724015740545
1400.092544331771	475.5167508661443	208.9746115807341	211.0326246316092
1379.0279678728475	472.363415042709	191.5753584951068	217.3392962784799
1353.7752768044163	463.8607286497443	171.28028950072155	227.90826441611406
1248.6221137312295	457.8334044275777	187.19799200481887	233.6923120977932
1134.1874550878053	464.6394784426277	217.52503919603936	220.08016406769326
1064.410713294441	493.2820493504903	205.46791736120326	211.03476034064784
865.871285359688	503.9013533268736	254.92237981635066	189.79615238788114
859.1587613521369	477.45840301676014	212.47029217675902	200.77420126708762
810.7589437868266	470.8106300682737	179.1272148818567	220.57688278533655
737.8966153085456	461.5541838730918	180.27190138694164	239.08977517570048
684.2260740020948	456.2058932181867	182.2071981220845	243.1984948681506
582.9867828533801	468.2855511137159	177.541715866423	225.72124567557898
566.2738403991143	480.1964397104339	160.25354824150662	208.23872504882388
513.3713305297649	503.39789553760227	173.4071378922664	196.58009967746426
452.8229621430066	488.89902894257267	160.55847672757605	190.63555514451298
355.3311163409347	482.0353167563893	184.2503745255791	204.36297951687965
291.70925967595383	475.52428311917686	213.60855291868302	217.3850467913046
196.8613127931547	474.73837461784564	220.04908431708168	212.16962815073737
168.4649584437351	504.33961986594846	222.39130400355816	200.61131554034898
254.38994977950242	536.701166486186	203.70408673972844	182.50297698917524
297.8269213482458	543.8885372397548	201.9460770056063	162.04852595322615
382.1495641781402	550.1744140935439	193.561125767793	149.4767722456478
478.8218668303581	553.3115391993093	226.6388489270164	143.20252203411698
583.5725011677252	536.5173321934251	219.68612479628825	159.4296322278277
704.0906132525203	535.9195307211505	234.5620091079445	160.62523517237685
928.2562201692757	530.8310217398293	244.7444828480618	164.60612222186225
1085.2239810773126	541.4323844023797	245.16888865120129	162.64992307752948
1333.3423075140836	555.9020863477053	247.3047105291557	159.26808199464736
1504.7777195740575	551.7424636889355	241.78340069991452	161.2222421368907
1701.4634408931156	574.1000819951383	220.98307658912722	154.39559384929817
1811.900419601307	579.0812970545911	216.1991607973859	144.43316373039255
1698.5023756967184	567.9654964471945	222.60366859355702	121.45623571174863
1700.790609333288	737.3527619924116	207.30837719616486	131.04348865953202
1727.3959442660193	755.3593294684698	185.86427978821592	132.09135490784797
1693.1765853561517	673.8762432765241	209.39982485178163	105.46635343235673
1615.495732868783	758.7339628619551	203.37428960073458	102.02867691836327
1535.863318420021	911.2976377241316	210.86851880305272	81.47120162252196
1474.0162532012366	919.0351394452064	217.83267892356443	65.99619818037232
1436.744982999491	925.0085939987018	214.8512867044671	58.356174219080955
1400.396684591283	926.291562254089	200.98073843408918	55.79023770830675
1351.584815690242	924.4298150041918	193.88058621281925	51.75640702118588
1500.1892612199351	1029.8907929693005	207.7142919775222	59.304846479317014
1540.474550646339	994.1815481707748	195.81333293659063	70.13249506588969
1698.4344461729322	1038.2521446975086	221.7337364314668	63.38182452386579
1712.4737161122803	1024.350910403202	210.90883657833496	65.30383307413207
1733.8209007752407	1021.0373078531421	197.58641837021815	67.73504515742272
1692.9648149086233	1023.0639594056763	202.32465355957527	63.68174205235438
1580.6600008445835	986.0637296454177	196.40744168600327	64.88425209866588
1747.6570705420008	1042.6082165024623	200.91532698767304	74.78356699507533
1641.3948486238955	986.7513106141671	202.10996749930382	72.379284976393
1639.2364554900912	1005.047091346218	214.82722301961817	69.38960052311249
1699.6047811477947	1022.2285523131309	219.56995388358797	65.31480532223976
1682.3068004576785	1019.2069353806559	245.52825775584438	62.72038167921421
1684.59405047962	1016.9374498709144	245.58974238117918	67.25935269869717
1647.1598107700067	1015.9716436720415	254.34437622259168	69.19096509644285
1538.2251075643478	942.7987868473546	247.64139634518568	64.19441842080717
1422.4816217895384	1003.8146112894694	230.36982301957033	82.96949305086046
1375.3091812021612	1012.3299618579221	262.36618437561236	70.7348319000101
1463.553396478429	1014.097385735197	276.7891260433412	67.19998414546018
1625.040146247866	1010.9639027912494	278.87371916085164	73.46695003335518
1444.3451126258713	943.5881232489603	268.7236283237406	80.83331206155643
1431.0908849213135	818.7635310562081	268.7205683272918	81.27425163475613
1492.212445633327	817.72381878641	242.06527304340668	83.3536761743523
1640.7514890030238	823.0357736577155	258.09710101598137	77.69976507796304
1561.3890928612686	669.8259289135174	238.5390998581908	73.39801456866304
1639.722492768347	536.229761324973	200.30157312232427	84.78311989664573
1646.130976905486	407.6406676280526	178.69177758197515	100.15855747355018
1602.3971198877978	369.4349093768953	153.12221625451156	111.35626126653399
1477.9383277476109	357.9990709408868	136.31105659400515	130.0759265144747
1464.676161818613	397.3018836040174	141.86147193006593	114.39205075401742
1514.0841838767828	393.0942077484812	135.72824910677906	98.62927517124987
1591.409457486204	415.9163542145318	157.67406456123302	82.41770935136485
1689.3033968449192	420.36659743636625	178.4726353968767	73.51722290769592
1752.9043819937303	434.9883652638273	167.71080610472282	71.44305348738307
1775.2809112235034	436.4667122889357	148.78167310269203	72.17549164538266
1762.2684762375566	441.39714741439343	147.39086980212923	62.314621394467125
1791.3877685631246	444.53974559875627	131.19158450836187	72.19838631703706
1801.4545049990916	340.59955558608783	117.3963710011285	83.59272603665057
1724.5070922683362	313.4324157632311	91.51483756745594	112.69523601286465
1763.7456666875055	340.23451978360197	96.53875167327075	113.68787682022332
1686.1403466880324	426.2132882506765	96.27806253710743	113.74117212066332
1790.1622887417127	435.8336336407623	103.02862213997898	120.93672056636652
1838.5268013606865	451.42045219498436	87.35604527780728	121.48082412670436
1808.2498451855051	386.60022449614746	95.46556413585475	110.17697201378118
1692.482306712742	509.4677877100593	129.58068335927226	84.51655255486557
1708.8231840325466	525.8993199480709	130.4277905143588	68.41791897619042
1721.0642522487526	527.7780313555663	124.50442133067189	64.6604961611994
