# Supplementary material
Source: ML conference proceedings conference paper supplement (https://proceedings.neurips.cc/paper_files/paper/2022/hash/1c8c87c36dc1e49e63555f95fa56b153-Abstract.html)
Supplement: Supplementary file 1 [file 1c8c87c36dc1e49e63555f95fa56b153-Supplemental-Conference.zip › GOT-10k-Results/VLT_SCAR/GOT-10k_Test_000049/GOT-10k_Test_000049_001.txt]

364.5	405.5	910.0	501.0
395.0903062470384	398.2073352821223	913.7769615577571	492.5994714184775
476.6134926433908	402.89010631503567	904.0163048805744	483.23392935265076
495.3898798292928	407.02947903642774	888.057284818346	474.9551839098666
589.9413201758298	410.46072814124454	847.4724878193022	468.092685700233
604.3194025588305	403.9212664512814	818.7163230533007	460.6705420724046
621.2222533371519	399.05520774298566	784.9106214966579	450.4530574454281
638.0369907078597	356.03100172887827	751.2811467552424	440.12409718010383
627.2945397007879	345.6259887318262	716.9611576159391	423.73086240524333
643.0549734800411	341.9137248861148	685.4402900574328	413.3407376746911
637.6703110238715	307.2689263200166	661.8686469830643	396.77791484011817
639.4916481890461	312.9617010426264	641.685558938686	385.39236539489855
639.5108540095596	307.7452737969871	625.5990801818525	379.77715277037066
630.1687415105007	310.27531358802315	612.8554378312376	374.7170731882985
614.006692656717	303.8869453148525	645.1795355388052	372.05493894321023
547.3624692581034	305.8016238530419	667.3469896591614	368.22558186683136
626.0265089132714	261.24643255921376	671.3914523797459	376.6496934390274
635.8060663539179	253.99088782587904	668.1729374476378	391.1607829056968
683.8543305987403	251.1905981455398	638.2332575534293	396.7613622663753
681.6321756105565	254.76927844730054	642.6775675297968	389.6040016628538
757.2784410563088	251.69503436600436	620.4554988587362	395.75248982544616
647.1401949196562	287.9069264610088	602.1544809714494	386.94937501159507
865.1987944973075	285.6297240723443	553.1370875665401	406.98777201893984
826.6986583864319	339.2375113646896	509.5275983258614	420.3819588966793
722.5100190078381	446.1225401291668	483.86627518542934	426.0230906467435
666.3691393776171	488.9585882846007	467.25250041625566	426.28135035561957
610.0627419226356	542.963374015888	467.3236904168894	416.74568318870797
562.3933228176159	548.5884326043401	479.162597846317	419.41222114190543
558.835540274084	550.6440292996007	486.27816293338094	415.3010277513845
554.7357213845623	557.0902817122218	494.4778007124242	402.4085229261422
568.3386293495755	537.8476959318986	495.48313850169575	384.4713870481931
626.038278825157	542.3412721065656	476.89352842322285	375.4842346988589
649.4165586449573	528.7171909386035	443.53646981076713	375.9333949804941
652.8751813935125	525.1361183139696	436.61922431365656	370.2014859905057
657.0387209523852	497.2299608590797	428.2921451959112	362.538448190229
658.2744556685185	495.5957580019735	425.8206757636447	353.3635954704208
646.2225531900579	464.3971402488785	425.4097851608275	342.21674429739505
637.7720806376972	470.7043721202448	430.23988499571817	329.60228055466246
638.3921471072656	462.51846155450335	428.9997520565813	322.09459896780635
634.4850318652782	463.8312876831636	436.81398254055614	319.46894671048585
628.2611325425024	456.3264518717234	461.13585337543054	334.47861833336634
616.7409282134147	451.487985724434	484.176262033606	356.6451581750955
776.204181846474	487.26484072996726	468.9222076077822	403.91979927544855
376.745667538226	471.86556014069515	457.4145965463757	448.4543712959912
242.6006632612071	405.0713204648646	483.1914693995021	453.65354351187585
96.98340671641176	256.3906278176497	523.6482490719765	411.72740712432454
9.499451340458165	180.75240936466764	522.1688793499696	386.55656355637484
-25.177242551372075	142.53482084860508	505.89780978337177	363.0965403465319
118.35613042252919	622.5317117673683	518.881988432732	357.8102458636141
44.86028733558817	556.2842546814774	487.1522847965897	380.3227663061501
-1.9475228989632	552.8443219688469	471.68708851141207	387.20263173141103
161.4606437102756	611.3972826770802	469.0976421980234	378.1723392833074
58.34703520768065	625.4180993529546	488.79428522250015	350.1307059315584
76.08654171850196	666.1957072903306	479.64771843308256	347.57282875348176
-143.93157189261748	499.8718064392449	426.2342380520775	381.553702169479
32.63337150039237	684.6324402608435	429.1580653528222	355.3699445385189
23.418889818785743	689.8825400109049	435.2459260422427	332.52864236460346
66.29572317372907	703.6703462913488	446.0031102432398	304.9530298037157
47.768602023087055	634.2657609496173	435.9620975302897	302.4764354444761
9.699642766170257	626.8064731038746	431.0305231056146	305.81365500188883
198.95441436448252	529.8555676515757	399.37743292633814	337.84912116505757
156.27458573300677	510.73528084836204	368.7395489723928	352.8901865281056
104.1083566351542	592.0731146378478	359.4363817865977	337.9408319450845
138.79652599689695	575.1408362537979	344.96511298607277	327.8813327748157
143.5923536147247	634.5974624911912	345.96861087270804	304.3244584006459
206.83587910818142	667.14672652744	321.83740670060047	300.6394384170319
157.43318578553266	720.9212084442036	312.82779116110817	271.50138526335184
-8.895960987873707	654.479376813407	296.02748461588413	266.44086427808844
7.259568605054085	657.5149244207494	307.98995126067683	242.66035873114458
44.625279165368624	633.1068322375409	311.1660184254047	230.88182998672835
87.46582035450993	633.1140672070834	293.58690971800377	239.38010675650344
103.08839086678532	460.3441246762374	321.01801914092033	224.48016764089618
141.0815621900661	645.934538850594	313.4862817486554	229.79966819081432
126.3563044399898	622.4267080174601	334.40652654508847	225.6337056347645
98.15310102555668	597.337118564424	338.1458593063659	214.36796479531634
379.66788376063346	642.6171415457525	302.53736355196696	244.85537745594718
369.28791144322497	632.545041063072	263.0386154687842	264.99957842130834
372.3191745217933	635.5786768018734	248.66054153855166	267.2478547168014
35.108831281750525	674.949439390116	305.7162557787804	245.36889277293454
40.09062586923886	613.5053181957497	304.41815440751486	238.27481810599983
32.02936588225623	684.8674534423434	312.0102122909176	223.50747897125058
36.69041565881196	682.8211544809553	311.0926206231004	227.60007689402664
94.57109807009013	686.0265549718986	322.19881966371395	212.73143832126215
94.38570072313061	681.3886384636679	314.18972878321836	213.62738576330887
134.13665929749942	662.0186712627262	292.6077629793291	244.09304140164238
222.0920257451727	684.4973502712718	294.0072534344873	224.4657152917664
139.13128032585004	685.1915415794274	296.9978073260748	214.93078582810233
117.67954949937314	586.9434478871676	283.6497730089802	234.63655730675555
382.9244999065234	638.7042247192704	258.6372038179851	253.40790645463989
361.3423908834617	615.3218309148197	237.2926426946754	243.72751229028734
