# Supplementary material
Source: ML conference proceedings conference paper supplement (https://proceedings.neurips.cc/paper_files/paper/2022/hash/1c8c87c36dc1e49e63555f95fa56b153-Abstract.html)
Supplement: Supplementary file 1 [file 1c8c87c36dc1e49e63555f95fa56b153-Supplemental-Conference.zip › GOT-10k-Results/VLT_SCAR/GOT-10k_Test_000050/GOT-10k_Test_000050_001.txt]

1136.5	183.5	38.0	60.0
1126.748134881442	198.18980279063553	38.101078979344756	57.22437130538573
1122.065185430262	199.3404061603109	38.50527430506244	56.41678182880874
1080.7136202176046	265.8715771395145	40.84736440028188	49.84867001962546
1031.8434497494734	307.4401836570912	47.290146596048004	43.743772171765634
1007.3640211116699	366.54845052834986	43.21568154242449	45.92721344696097
1019.415671638003	383.82935452676793	40.16732171834254	49.26429966157646
1036.0278187663773	378.38228154301703	39.293660616011294	50.31260075599465
1057.5759675850995	322.8838508685368	39.85938631032627	52.85862995832852
1080.4043992316717	328.801362017612	39.35508279720731	51.21934696534518
1096.4817587991506	327.8203246209621	38.51310564460906	51.758115304901395
1095.039912233611	327.06197176685697	38.56127209518925	50.43929433261273
1090.2712011773099	329.9483748720532	38.309476398485444	50.260326870395275
1089.3696476635553	322.6477006071236	38.72096129674411	50.94545410774806
1081.7369931501958	306.16832957206344	38.489635307936766	51.50214114540426
1070.256864870594	292.8934991487107	38.83413809744725	52.609079001204776
1060.8603859014222	297.34807795032833	38.959614546605984	53.75164219983809
1061.7081433937062	303.37078127353044	38.7194661518415	53.349168271859064
1080.5907498653655	277.8241226999975	38.53247986600692	53.8564110723121
1096.2735616109508	249.24059211657666	39.065343381314484	54.476154364033434
1101.327781816553	237.01428049319702	39.23351966013197	55.439368033600175
1111.499435229795	235.55711348507592	39.68638411455976	56.868261244063056
1124.4135236617194	233.61590586373083	39.60496079364495	56.20713174388247
1140.453308230144	175.21985362744175	42.09849013522981	57.25451522344053
1150.9892599000711	211.01591345901244	41.307320243250615	57.42499083739426
1152.5434781530598	272.6283673622533	41.29818666550346	58.17220016012729
1144.2508795342771	271.77817265344436	40.71438806409793	58.31177177420233
1131.0742410397213	294.1072542633051	40.66158011682228	58.69928285772977
1130.9498039128428	324.0487230289129	40.91045437057923	58.0309386031217
1128.6336048832784	323.9320571040473	40.8859836794127	58.26427045285286
1121.9576028685585	304.6926830910457	41.794676983652636	59.41308630325685
1132.487076194761	316.7394950987641	42.964567495810165	59.13607353556526
1140.068619887676	332.1445308557603	43.829821226389654	58.77985014275183
1127.2058846611503	291.0388555296192	45.38118882573251	58.79925109242421
1115.8092315727015	251.64724688000004	45.25325609235742	58.99536355644166
1095.7784853371988	232.0323755868332	47.63751164061534	60.547869220027934
1076.0734332616817	226.10326481230155	47.93217640547467	62.20206310313263
1062.835496803841	245.21712451343376	48.44673880202263	62.05093246226431
1049.7232056887758	286.9442577971605	48.61901198367575	63.70087545317003
1055.927652661446	312.4506690431794	48.56390103314979	63.86801108250593
1053.7792889524715	304.88908106073734	49.32767687599204	64.85938074696355
1041.2431445994828	298.64914605446785	49.28315554590654	64.78084574147121
1042.0128629243668	318.69314253556655	49.535852615268055	65.91192831926071
1054.6843273895777	317.7726974488244	49.58187958474727	65.93932164275218
1062.3121781790956	319.1713160144052	50.65817571400974	66.77141733565678
1062.963111319182	340.0015921581589	51.2012368723489	67.54419613392807
1078.145230653635	353.84675807516874	52.5517534551989	67.83747187498764
1078.777494471143	291.8841231009574	53.179294773728	68.77825984300897
1064.5898136437079	251.32289732664708	52.80475852114062	69.40099725074859
1072.0299133377748	266.9415149429817	53.28502493224809	68.88469361656261
1086.343270339207	274.4534547622652	53.45842360908994	69.22087407383896
1121.1883181650512	274.50678989254203	55.103093336325045	69.11420381328541
1195.772033503393	272.6800909524587	56.32162415827643	70.81453725840478
1246.2095807956007	293.66641026048967	59.388779345241645	72.81746585331162
1216.2215125490723	324.2156218685501	61.1444784342703	74.09808271293532
1175.6759686663793	336.47052964851997	63.523232077937905	75.11659173301236
1130.197187983996	306.42077093069787	67.22498991493863	76.31844178741474
1084.4864538566717	304.30737951918866	72.78955435778634	78.28583240485943
1057.1446330680178	357.69719224609804	75.14077746912014	80.9285364708049
1046.9681922236646	373.29294593626867	78.29212569968513	84.14009600674694
1086.7265980398488	380.43684743378924	78.06008505461324	85.1977325576342
1146.2547211017184	409.8669329161658	77.24108394810285	85.45618410149525
1160.3610102673754	408.3619807471226	77.20330087364549	85.90474341623124
1148.9154944661295	424.40093722228437	76.98488242442156	87.20714720727437
1139.6001521807116	407.6591289811297	74.93998171643346	87.09293761149519
1139.139855561987	379.8963773144614	73.31067037572214	86.52054022529856
1096.0857248803009	350.4344915168419	71.39824215388523	85.08726753353733
995.4722636136544	300.34122984216026	73.20475648235428	86.79457695459232
912.4794976754031	290.99382678628047	70.52439977675601	87.86757381150547
864.532432561195	298.56104149272494	69.28431869410522	87.6768692157037
841.5713635154032	251.58164049524748	68.32236982274227	87.86749728476539
840.6812872013369	263.8681964014824	67.64765882821965	87.84302169884896
831.4337281258072	254.30396646859447	66.59475069831257	87.42345528365823
830.204916415323	251.85332549113107	66.63244174953925	87.48487249910222
823.0559485850799	307.678687408811	66.40147312533773	87.22241484634833
831.5477547949739	298.02674174561355	66.31384826392278	84.80289359769242
845.6041587435536	269.02017133282277	66.7050488057939	85.80801754521282
842.6757521797538	268.77430242613	65.37066442592369	86.29975535859832
842.4843502458092	275.1593261464897	65.75346829381293	85.4438013769375
843.8881518857344	247.6136620800845	62.945865013962376	85.88698585856434
