# Supplementary material
Source: ML conference proceedings conference paper supplement (https://proceedings.neurips.cc/paper_files/paper/2022/hash/1c8c87c36dc1e49e63555f95fa56b153-Abstract.html)
Supplement: Supplementary file 1 [file 1c8c87c36dc1e49e63555f95fa56b153-Supplemental-Conference.zip › GOT-10k-Results/VLT_SCAR/GOT-10k_Test_000051/GOT-10k_Test_000051_001.txt]

763.5	389.5	74.0	228.0
777.1207316937872	387.5851257013453	77.94958929058039	226.23102678614435
786.2866760192783	389.4780001149746	92.13813322523119	222.4452779588859
798.1493585465677	388.1777087050889	102.33933906846859	220.1992077932549
840.6905021588543	389.6001132072971	117.13403094296169	212.36054983388505
862.8731364630987	369.0780242562124	129.24748811269748	227.73257965504328
846.3821385652751	382.63723135562253	162.22948390834475	217.3181393897895
837.6592190848645	378.2730655058122	191.5980579159961	220.085103565995
855.6365900721419	368.6724510654276	200.99854129285868	232.80701453941904
876.362086715367	343.7811647007005	186.85551123082917	248.4546332383469
846.5383466599111	344.8178238535658	191.79821092539834	253.2194124846592
765.6180701491244	355.11005086059004	213.80988465716354	253.609290364082
710.1139974345875	376.0285735071069	229.21267624831555	248.5435350087105
709.5148861346984	377.963450099195	222.8887188296394	244.67378182453433
711.3177368708366	366.25413544263284	219.283017357363	253.37002987937103
685.0911321538827	360.60847112530826	227.10514086346382	264.66135851402026
724.9544918932785	353.3252951516903	201.54936519844907	279.22771046125615
728.2486932399779	376.96333369266995	194.9609625050502	277.2309133258518
669.492892245938	361.0056713795452	193.94740476631443	279.51494802039747
676.0649967048993	366.76556045363014	180.803195848392	282.84636175437504
673.2389476677815	369.0133971586116	186.45529392262767	278.3506883444121
684.1169351459096	360.8539666670532	164.69931896637152	294.6695493275289
689.607130838728	368.17953752398194	160.88032983016075	280.01840761367146
676.0579049703131	339.87542340469065	174.2195352537468	226.552665346303
683.7051194532582	355.07332871016536	184.11673312022566	196.15685473535365
701.7516994520439	359.9790421677423	171.97481302671508	186.34542782019972
709.1269198678481	357.2191741177553	162.86607599045772	191.86516392017376
698.0000561874308	360.9852020525353	168.37485294714136	189.91475818533053
644.7964046665254	363.79515940481775	195.82486655064127	189.93464986921654
612.5209626985687	363.5721417670327	199.62799081144263	190.3806851447867
596.5610504918911	361.41307521844533	188.55775421868123	194.69881824196136
555.1120565916884	359.69269514036404	186.9609418509242	198.13957839812392
503.56271004866767	361.1147083725207	205.1645263836303	201.35948825904893
447.98888483489003	365.7262778130554	233.08769939680076	198.53823225600917
441.9034791289637	367.7707782107169	231.67488547307602	201.2410441284748
448.61489400190726	364.6718052151798	218.2520557271889	207.43899011954892
449.1200837908383	365.80863222726373	217.2416761493269	211.86859139222844
421.41688755939083	385.33194925280924	238.86052076934772	213.36701475258633
416.5309732985897	385.5841535001099	255.7512131659722	212.86260625798502
449.2197191012607	384.5471915385147	249.34983549817593	207.56451593898217
484.4142231895409	383.1592828388555	236.464630448986	217.52830872922186
491.5000151297928	383.73895457770845	236.58892681266275	223.51690537360622
484.64423219305775	391.2823871643874	257.5455227074711	222.92010024292483
450.23715942967294	390.7030547884209	273.42934951859473	224.07876499485775
454.3948964433192	391.10674667699845	265.1138754913022	223.27138121770264
459.5857594102731	390.36033813673487	254.7321495573945	224.76419829822987
402.38283957132796	385.4071290200991	255.9264528945227	227.12318077545058
337.6391156772521	400.3492590750625	278.9621115214807	235.25741679452153
301.44093531780646	398.8312005532632	294.72406298560577	238.29353383812006
281.06925495047744	395.3381118456314	276.791959120777	236.8975020248856
284.5356845291821	389.88486192669404	261.775603480654	239.72050538004652
249.09919358191505	392.1094997863775	269.48324992303975	235.27122966067964
212.16643968305087	395.9564089560841	279.7941703838588	235.5217347383801
214.52066911699535	395.0613272145686	275.0857115159698	237.31189822141104
217.48956448326084	387.7955278909096	269.14792078343885	235.7159564903818
219.14893083031376	384.8417960978918	265.829188089333	241.62342007641746
187.52079247165995	380.5883230187459	273.16171971097197	250.13036623470924
143.9656602845177	382.9787519259937	286.12256264442703	253.58833302475023
101.45034047211371	381.91904817409835	303.1890207126536	255.70774052854097
71.79536233584793	379.20882156373796	292.1503395198987	252.33461406610093
48.45200408303046	374.6080453576823	278.855225758576	261.53616647821235
-5.051031410879403	370.70281801690743	258.22617739760994	260.83761320317626
-23.629988061505557	369.40816909318835	205.46781303795737	263.42691105061436
-60.69646418883728	157.2549169724599	161.67992324006323	304.4906786212591
-42.12319545915793	133.3126838594594	124.53338578070452	323.3565995564994
-31.84597488672328	118.55972373295532	97.10149293471417	339.1076164072655
-23.51156784527146	117.1392316047536	80.43267885181054	335.3487540476825
-16.11638562615775	66.4413808290663	71.87480850019752	318.32706795338345
-14.855239084043184	204.77459148072194	69.35251541596838	298.20037673169145
-14.473318674983055	252.93131369663854	63.08807198697458	284.3959714629615
-15.678179523115144	288.89291538267315	60.310475681251475	264.3459481107651
-10.38817178350438	324.224252738401	59.43790116635219	242.2204782209206
-13.108304974206089	351.29334963263346	55.82364321332405	228.82764393739774
-11.909322121238844	373.6198998552815	49.15497630479532	218.34015311285552
-8.920811229418998	382.5167945899962	47.17428671795328	212.5353602338191
-10.200006168726498	353.08542894356805	45.855556351423836	197.732806868931
-9.802128571344822	411.6421922189629	45.059801156660484	186.32037503539726
-8.023136665994997	435.7690556535797	44.97168260390808	172.76530074563632
-6.99960241005339	430.7951478997853	39.646654935202534	169.60127962593577
-6.837879541604112	421.7697825859076	36.190868846628575	162.59328744028818
-2.577643567250039	427.3137857095563	36.57446720053434	157.44132806139987
-5.8941367408099765	485.3908305027643	37.400726646954894	154.51841303862085
-4.933945465471794	420.0932998179967	35.48034409627853	149.8370276203025
-4.30581938149067	405.9924952529798	31.44809472827152	147.502667549844
-4.645519911791414	417.1851936511863	29.461646180824083	146.44406761782233
-4.733179469018893	415.19206603110024	29.63696529527904	139.98015917863893
-5.4149610819356315	416.5485760544911	31.000528521112518	132.21537643593888
-3.948111742234321	407.69107757737856	28.066829841709897	135.26846105493607
-5.041628764609978	413.1891694280324	27.82410185644689	131.5615634436714
-7.136054734336108	468.8199547659756	32.01295379589915	115.2352606759644
-4.7745727431136515	413.72092385988856	27.289989813454238	123.11308786552792
-4.722815088745177	420.5469242299596	27.18647450471729	118.4417340992477
-3.9346397285333072	416.69290038573365	25.61012378429355	117.43824301905137
-3.096927217933013	393.3950266869797	23.93469876309296	117.0961604415117
-3.4952805153600064	432.11717754850633	24.731405357946947	110.9267067656069
-3.8184981120252015	439.7161552397127	25.377840551277338	105.85710977325216
-3.295807162497079	410.7395371013144	22.365316824702848	108.73037487953798
-2.990118919528694	422.9781714048872	19.804657831581302	111.5430613729793
-3.8606212957151183	435.6376730438839	21.54566258395415	103.66821032634873
