# Supplementary material
Source: ML conference proceedings conference paper supplement (https://proceedings.neurips.cc/paper_files/paper/2022/hash/1c8c87c36dc1e49e63555f95fa56b153-Abstract.html)
Supplement: Supplementary file 1 [file 1c8c87c36dc1e49e63555f95fa56b153-Supplemental-Conference.zip › GOT-10k-Results/VLT_SCAR/GOT-10k_Test_000052/GOT-10k_Test_000052_001.txt]

303.5	578.5	197.0	180.0
278.5517532836775	578.9813507688399	198.41250407350952	178.0372984623203
261.01286907827574	578.8912012812542	197.9332399897903	178.21759743749166
254.44785079022324	581.562683952789	205.14167589181844	178.79623276849873
274.4851929197819	579.6768956018983	213.40864420695777	182.56780947028025
301.3117665172781	581.3635893388017	222.06669117260992	179.1944219964734
316.11671352279996	581.4662266142027	224.00704318128612	178.98914744567156
311.7155440909872	578.1743926419329	226.47289240317934	185.57281539021125
280.7186726622899	576.2942518133822	236.61933800196178	189.33309704731258
250.08325193603878	575.6899902958794	244.3096118128384	190.5416200823181
226.09829006895296	574.9381688852527	244.43487663534313	192.04526290357137
199.57533640519512	573.9583847430551	249.4515895660813	194.00483118796652
198.34438024763003	579.2565493208585	251.91350188121152	190.37840733839033
200.39280223533123	577.8046372567313	254.76501154723024	193.2822314666448
216.25282973879865	597.107536629724	258.2411286444825	196.91183924568404
240.95788313541993	602.4384800958198	266.04284184169614	193.40142981229937
262.4165665330675	621.8150075486515	273.614367444139	190.71186947644873
251.72296191718746	621.5131934804556	287.71854798920975	191.31549761284043
248.98716132167996	618.4480495893976	293.19014918022475	197.44578539495654
254.98145963493334	616.5844505862076	288.8912354560083	201.17298340133652
254.22664942148168	618.0942191358663	298.08743304395637	198.15344630201906
254.3928566306063	616.6506332372276	305.5301187383379	201.04061809929664
254.83394681537308	598.7173755689765	312.58288994414573	205.16732713443298
260.0162339454715	596.5898339347633	326.5469951269559	193.20329077418796
323.7671384010081	576.1179936406191	320.8065230223447	177.32501418612748
363.6025467293297	577.4314211506115	318.7638050585708	159.17253942756892
391.43139411904053	553.4204606711726	322.47341447572313	147.82715618987277
441.0290821505448	552.1760379275862	296.0532510885492	135.7609591418787
481.99685061321975	553.8734058850507	267.57426007230873	125.68415498831077
508.85656430927804	545.539419724065	232.1291379325508	124.07782205792353
527.1427165407516	550.1251050010196	201.10149656945399	120.45111460386482
527.230093171491	560.0646435193274	190.87905686030018	110.6197240149243
516.0940044699819	559.1532903359449	170.79933110436096	112.44243038168935
506.5236778611621	557.4934216187364	154.44583272358483	115.76216781610628
505.90110874745955	555.2034325623218	130.22500039852602	120.3421459289354
501.63650695039166	563.1524296528106	146.6445478263422	112.33449558163835
500.9765427084378	568.3337066999255	160.1728339104863	106.04139402082072
468.019014694898	566.462468510253	159.35786603142824	109.78387040016582
457.3732416877121	566.7893874773639	151.10633550418842	109.130032465944
449.7324970269053	569.1169359332814	150.0483831607887	108.5597959703623
464.96739133474455	570.666009985581	156.11361026475333	105.46164786576304
467.4921449360422	568.8262620755249	163.36392956725717	105.04120151750888
493.3201248946489	567.0602599537846	170.53360699848156	104.37137452181547
512.292902198158	567.2341258857467	197.05434122846586	99.72589006875754
528.8585276455686	563.9976998775819	196.1962004189947	101.58829778718007
568.3358658087278	563.1559358771777	219.1009369728352	98.6418524752537
579.2792464472851	561.1948547447462	207.040386182764	102.5640147401167
605.1437867762551	551.6342489659307	198.563126005877	107.26795280406347
632.1327238903557	552.3683791483915	225.54414263998132	101.03740474135938
651.1913089406753	555.1335378980848	227.8166719904198	95.50708724197264
669.3215762423655	554.2953612956981	231.42807259518298	92.19944854572807
689.6157128238524	552.8599662595125	235.63451576925073	90.0930479139835
715.2957958806156	548.8450034882833	239.27342649820048	93.1230573798531
740.2042230046449	543.7897060739826	250.7348953639201	98.12712528230628
768.9223082436552	526.836227775414	241.546531476266	105.22974488479525
784.9635390524503	527.8290949349259	236.23667513010832	103.24401056577152
815.9272251569515	526.3608556751398	221.49261099176482	106.1804890853438
817.7513180364442	521.8959969920184	197.52563766433724	110.03050955947617
838.9134189707405	524.3917458414745	193.5546787316659	105.03901186056376
902.925615428052	523.090992666065	205.03997399286476	102.99019527218898
931.4807841583494	522.6016115753227	186.20046020952464	103.96895745367331
957.8194539745165	523.1949317934849	169.71104946933184	102.78231701734907
990.8535391615306	524.0135441584349	163.2653986756856	101.14509228744906
1019.1491649930683	523.3697868729784	139.75507227450873	102.43260685836205
1037.5550497888555	524.5194124749175	129.56178477163405	100.13335565448381
1059.7432045104047	524.8047024033517	117.67382576744262	99.56277579761547
1054.1411768737157	523.9349295415489	122.0417305096747	97.88424625564825
1054.2185827958006	519.0218459523654	121.88691866550514	100.79406594400464
1064.6132440194544	516.9930500183578	125.61755988633138	104.85165781201974
1070.0889297416236	521.0168389316507	136.42069702968337	100.42983141671579
