# Supplementary material
Source: ML conference proceedings conference paper supplement (https://proceedings.neurips.cc/paper_files/paper/2022/hash/1c8c87c36dc1e49e63555f95fa56b153-Abstract.html)
Supplement: Supplementary file 1 [file 1c8c87c36dc1e49e63555f95fa56b153-Supplemental-Conference.zip › GOT-10k-Results/VLT_SCAR/GOT-10k_Test_000053/GOT-10k_Test_000053_001.txt]

640.5	402.5	26.0	38.0
640.7337801771197	406.7513157909246	29.54961518027212	35.52141416646694
643.1848931629111	407.38589249079104	30.789356446686924	34.252260766734025
643.4283578515245	408.2110492532412	31.32634150900281	33.62586168137639
645.3775418760616	407.8124127028333	31.518809748264246	34.42313478219221
645.6633825826474	406.5283633437355	31.985332318571153	35.95302951690915
645.789016062477	405.76861914972665	32.80350458350566	36.40307868033332
646.3205875705845	403.96263097102565	33.91935925756668	36.74655850232142
645.4537256755018	400.80659846937465	35.65308304773208	38.608117834082954
645.2378776475932	390.64498555191994	37.254015338499244	40.22356390979424
648.520457238619	377.7351580993349	36.7883326046768	40.42541773240169
646.9443419962164	359.7959855624457	38.72493581139604	38.61931718552055
647.0845241818861	332.4729260310552	39.66259088837591	37.23654162561519
648.0346800809161	307.626283367111	41.39485694797482	37.28459623216446
646.9108568142256	282.6556594541475	42.40387972864578	37.68089394967912
645.6558395561824	261.93928120411385	43.653285127454126	40.03414781412949
643.9932633392024	244.4136750103327	45.66083336371996	42.14525525933465
638.676883318576	231.6534713641998	47.99861775639775	42.78073560587542
632.7969240985847	221.27449093142326	49.75549695652964	44.96162359741987
626.0135645016759	214.90095022992196	51.393172126699945	48.761921982686964
622.7918679010763	211.9049241821504	54.682346342338455	50.022645599889124
620.8808349246942	211.1123068534701	56.855923045977605	51.607880257249754
618.1102987445006	209.55916108534478	62.3969954063649	53.006580333536796
622.1448559885752	207.91324219357264	65.22312724803622	56.298418117081084
628.2955867752978	207.95307358660756	70.13357569498854	58.13118977772212
635.6741711651731	206.2431439846382	73.53575624186155	59.53334350092487
642.3739278702467	197.1656412094669	74.78496025535242	60.94695770996685
651.2188259786861	188.6596143333917	72.03828489769347	63.01589060289736
652.748905417855	180.94866969737822	71.10377658637069	67.80952703985044
652.6439028688881	173.95767385193858	71.31378168430453	75.22914685069134
643.3244141730935	168.8154869763726	73.79986205942936	80.89840716854775
634.1225061363969	168.221519106939	75.15481456910155	89.39299872043833
614.4161532808425	174.274021846578	78.32323139097306	95.41013768577886
590.0999424779937	180.2426872180835	85.96592615791353	99.86869767827062
561.7331021605584	183.1480960329812	95.90790524621733	105.75580543511698
528.9782478990504	192.153903270309	107.4449995084366	113.14306825965974
490.79336199357186	204.2588460000287	117.81754768553387	123.66856366014655
453.4673804700896	225.90060807735068	131.6270817526339	133.62216486288398
432.9028836826801	257.8244973943276	143.5162076750901	140.7854933846685
423.80034265330545	309.19659610874004	152.76700871080735	141.0155277207128
420.92858129983006	349.7542905339856	167.76167385088274	138.5348495517809
437.9696380041037	392.4388338525254	177.04222966440327	130.25495264282185
438.97342832872835	418.34128481864224	184.68521417117222	121.87759391267011
433.442463490613	437.42781180598166	190.9447802610241	117.3210850426428
426.13176245296086	448.37106034718215	171.82728326015757	124.35364431124546
561.2566713722532	479.3027457030116	161.93621565762697	132.22922455567226
624.6639871672676	475.44228371666634	164.66686780852478	139.95014852836294
565.1208068724479	460.06307313940897	173.51034454490937	141.94955650376772
528.692012273817	457.38506369231044	181.86644609090322	147.30557539796487
525.6539191059535	450.6831509517646	177.58930562710464	150.35607407953094
574.259731553467	468.0328175151489	157.7782878427687	151.7770242710848
557.1871473448073	429.4189899302596	152.92619406585405	155.8848128266748
513.0406150161691	369.69537856244284	158.5463944320347	158.6174036219378
433.2423813421329	308.2938575913785	168.30169828402438	171.53692566693908
399.37606646516565	280.71476834938085	166.4618546100338	167.8260881734594
359.51680178682614	243.07069472747594	156.68616040034556	164.14874403518044
329.65696832262483	248.95329131284205	145.6753566384545	157.43572734232635
361.8350132378174	268.67655859723607	133.81681747068404	146.62422040769178
430.8060682102767	267.80985020599434	123.9167479131821	135.11190887423564
509.22044760251833	286.98611658770193	113.90458841114042	121.22880932456061
559.5536169572866	304.1748875929213	105.79922530751347	109.06590145954016
573.6276312355272	310.78794663900743	101.33643187367497	95.83978336736803
586.1175068716421	306.2309411288278	98.0905298087554	83.21994518041679
619.7101787684906	296.62217821810316	96.5214532895996	79.61442151506924
654.5163122301893	300.03029096576563	98.94470349890167	72.79819601974434
707.6767860749516	306.7324160613179	100.49437098052837	67.48424196647616
756.7437197388396	314.4766582089576	102.39671711384148	65.15841733712952
798.4993521752739	314.11363301056343	102.79974138610223	63.26214619813257
838.4085927989474	294.36758546000146	98.28124576002833	68.99907533109952
843.2726997177626	281.1805786262477	88.5530319223979	77.00350553527205
