# Supplementary material
Source: ML conference proceedings conference paper supplement (https://proceedings.neurips.cc/paper_files/paper/2022/hash/1c8c87c36dc1e49e63555f95fa56b153-Abstract.html)
Supplement: Supplementary file 1 [file 1c8c87c36dc1e49e63555f95fa56b153-Supplemental-Conference.zip › GOT-10k-Results/VLT_SCAR/GOT-10k_Test_000054/GOT-10k_Test_000054_001.txt]

469.5	294.5	285.0	132.0
467.0608313995058	293.69886302652014	288.8783372009885	132.60227394695974
466.94839772899	305.1807986286635	295.6256345166373	129.20569266652515
472.8354770672188	303.5769111458062	303.5334901945467	132.41346763223981
475.98520301187625	298.38408558344344	310.6976100143831	136.0673329023896
471.8439634943134	267.27158721035187	318.9800890495088	143.09239315134678
471.2479333912851	259.6935789591579	327.31587118131876	151.10468772798146
467.25712616844874	270.5260166760057	335.2974856269913	151.65577372773174
463.1678816134105	294.3629537939123	343.4759747370679	156.69883880513652
454.22099453339837	321.6192461787684	353.63149536086087	164.09228232527494
431.7378890659999	356.57039130655437	366.53622207685373	174.34370261671296
416.64486546087187	408.5937708439226	379.95770454211134	179.26661438446786
410.5034594341009	432.28585303704006	383.57677159043385	175.2011750243301
421.63787675387266	401.16189933138764	378.5986070557761	168.2864020160917
440.4779019717656	373.7974154230192	374.7251699041344	155.4021432645399
458.7460947415891	341.86027289133426	370.86034874785287	153.93329956117879
455.7267031426408	324.439262447865	368.81310375027545	148.3451794707471
443.31712222568274	328.6256994432729	369.76108344782256	147.92936619205432
418.5745894636411	332.2164396931354	371.4664068832186	148.71117604044395
408.26689210342886	348.63065201482476	376.07821391736115	155.89172061276977
402.34952155338954	362.0520185598541	379.7168423140087	153.63732563300402
399.11330313291154	372.3138802161883	386.18927915496477	157.73900282328026
395.77976641602527	387.92602058559476	392.8563525887373	160.01389640827216
387.6425760623568	400.713494975161	400.6193395126278	168.48452276292542
364.5962912323096	419.7226083512983	411.61633007120156	174.33576988755158
354.8584227881037	429.0789374561494	422.0556007549998	182.7325102916899
347.8400350451658	426.19736557837166	436.09237624087564	188.4956540472453
339.71806294165634	421.26250251428235	452.33632044789454	198.36538017542404
359.8010172799303	414.7330178510663	472.47189701272805	211.42434950185617
354.3236916049394	407.40015416578365	493.99859988622825	226.09007687242138
354.42150994357746	403.22508881157347	516.0870445163555	234.4402075808417
349.66758678482574	411.3479665888914	537.2042977934182	241.41326594532438
337.21705499806035	409.7627029237502	562.105361366949	256.62225672109435
279.54747728711936	403.57704176824643	588.7756011328572	268.99357903210193
241.3144817763707	398.60825722595155	612.1559022775834	278.9311481166917
235.99407496736717	406.2035776995194	622.7967158955905	277.52589577399885
238.39893055425125	404.1302296677146	617.9870047218224	281.6725918376085
279.0921066400622	395.34161397750154	592.2733822831913	299.24982321803463
339.91651427643717	382.57408253210224	581.4153735124601	310.93603529608095
370.0998517308592	355.8925004176499	562.7200593295113	308.737385223792
377.35308020544596	358.608083614217	534.6363579757322	303.3062188306578
403.1931795174861	361.5228832227107	509.0954126959462	297.47661961367044
414.8302989980184	370.8055266662111	485.8211737348816	278.91133272666957
429.94902441895374	382.8983756819183	467.51604372570927	254.72563469525514
429.5675698224975	387.95621657795925	445.7793615857181	233.36015723672142
429.6228231168687	398.0284504148909	424.54182730533273	213.21568956285807
430.22005017098974	383.92703540829297	403.53812810088914	191.89540683555
438.9861196123999	390.85868724709127	386.0059892180688	178.03210315795343
447.65185066173143	396.94123630408546	368.67452711940575	165.86700504396507
454.5133608508855	407.07608927735686	354.95150674109766	153.86241945253263
435.11754543941356	410.2479595668551	338.7594140910878	147.51867887353615
416.8941025319762	413.7760921497489	322.6474168467897	140.4624137077486
422.1907415968594	417.36353276743523	312.0541387170233	133.2875324723759
431.3943706150847	418.6529807302694	300.5174244767712	130.70863654670754
466.6445652350575	421.3266921067744	289.93931926563573	125.3612137936976
496.70580375563014	433.43091988278627	281.1007966676817	120.38424115787069
515.492712010999	455.08339250703466	274.50027788278294	114.24725318038048
517.9847307840236	456.28763144551687	269.5162403367337	111.83877530341614
519.2462412742013	457.9661443118671	261.11736517173625	108.48174957071569
509.74846830790756	457.1535735411101	257.3328211559036	110.10689111222962
488.95895447110775	453.44472275058797	253.55873011737137	111.85545285425749
471.47769244436586	436.8836656166246	249.00382612956378	116.75083280697604
458.86967496379793	427.83076423182456	251.55987135946884	123.52664071096085
434.61197421325005	427.22928324165895	253.51360598624518	118.90939433200208
398.9244215859309	427.3217336545609	255.66830776583862	112.9561265499444
401.8221343512902	429.81065526679436	232.78695360726718	107.97828332547745
389.27988414598394	431.10902260869733	205.11516170352553	105.38154864167154
358.5257909536243	448.6235333141751	199.05600518057105	99.30995990543329
337.20170322188085	459.3278923458712	200.01104973220532	96.431522247309
325.9941840201869	450.9958800271297	185.65335481716966	108.49895521998893
330.1199948434016	425.5462783060819	168.21711282904118	122.6596772952887
340.1317656958731	419.13275427820383	161.8935795502236	130.9200558756698
368.3024772215664	407.5107554415177	170.01913717424162	126.53534754529724
425.09765323751765	398.25468047659626	163.55315311513436	131.0747538265146
441.83612984770446	396.15488545177993	190.30203346680565	130.64158744752842
474.06394673158456	392.3663654595577	221.46107914023875	133.18627588243638
494.8086272122881	386.5442704002802	252.01220926658124	133.7473135259529
446.74658007867833	357.64656079814176	288.10474074538115	143.51748249949398
411.0545146933065	353.063698316072	312.5806233375781	145.98202915241257
367.65788501383815	351.4002693115185	328.3607484668428	142.2075737385524
