# Supplementary material
Source: ML conference proceedings conference paper supplement (https://proceedings.neurips.cc/paper_files/paper/2022/hash/1c8c87c36dc1e49e63555f95fa56b153-Abstract.html)
Supplement: Supplementary file 1 [file 1c8c87c36dc1e49e63555f95fa56b153-Supplemental-Conference.zip › GOT-10k-Results/VLT_SCAR/GOT-10k_Test_000055/GOT-10k_Test_000055_001.txt]

117.5	242.5	290.0	237.0
118.76188129434203	237.59169419887863	278.187523916114	237.5278981070408
109.802474709454	237.78971856781982	271.7607673463235	237.13184936915843
105.7049963668934	236.15802179931114	271.94630702980396	240.39524290617578
101.32382657897503	243.01000939729175	280.7086466056407	234.7558129035756
101.20106572690986	243.9473147517212	280.95416830977103	232.88120219471674
101.31216121214143	239.15420263425898	280.7319773393079	234.3843891622531
101.60301983432302	241.04706955994055	280.1502600949447	230.59865531088997
101.47461153954774	243.33332756732906	280.4070766844953	226.02613929611294
97.9844724434185	242.11277066266948	287.38735487675376	228.46725310543212
94.22436002979262	241.4411694993397	286.7971434710423	229.81045543209163
94.45090768622359	241.82475888847608	286.3440481581804	229.0432766538189
96.03119572859904	242.74219034592406	283.18347207342947	227.20841373892296
94.10068032447904	246.38056259443934	287.0445028816695	227.95724333335778
96.72282758464297	246.2134651305588	281.8002083613416	228.29143826111886
89.14270106740085	245.2224197193467	280.91669674681987	230.27352908354308
62.54746615504686	246.86020348008762	293.90537965224746	226.99796156206122
64.53668929630578	246.91015216396895	289.9269333697296	226.89806419429857
58.15973592655075	247.80059326044898	294.5570090064814	225.1171820013385
27.00675688603951	253.883439039044	299.70404719216265	221.1170504291972
18.84826882240222	257.84757469433464	324.19955446392976	221.36731026310832
16.61157802112581	253.18978466955457	320.11957159882445	222.12952584501045
6.902382611357297	263.1109897604741	331.03353590267545	219.29596869454343
3.7395837667822605	256.2229064221699	337.3591335918255	215.8284725527293
5.071668727675927	254.265391062881	326.0360649353055	219.74350327130705
9.755365651490422	255.9156297392948	325.2227781247707	216.44302591847952
17.982364476661132	255.32558644783416	308.76878047442926	217.6231125014008
23.381690095516745	263.29168669494095	306.2286399239237	209.9494226943928
34.245782043228985	266.0499934929756	292.59381620007446	204.43280909832353
37.909743669379054	271.0052628067017	293.0622402130448	194.5222704708714
18.062171594397	278.4487951469731	286.92222412909956	187.27439916264677
30.45856096501177	283.823766532266	291.834759145964	176.52445639206098
63.67447503642819	314.6057175440363	357.1564073814262	151.55874225138015
48.50087956296335	287.03088527992077	403.19557742398626	143.94049039708986
51.803394893995915	254.22772278036072	396.59054676192113	150.94980111258752
86.84753761598489	244.2459564627565	385.32292734648354	162.51038145800442
91.95036371130175	239.8261438346907	366.6702510113744	171.35000671413604
96.7846305717494	233.05994174825935	348.66970932034246	176.55040291686214
104.06936181316888	224.52546327711292	342.25964074538376	169.1411781355141
114.47561119866194	214.9624687485853	337.32185440217785	172.39245476478914
127.89834329992613	208.62697523861388	318.3976383055466	177.14219367883487
152.3632977442087	195.66833187774142	300.36415999523797	179.8871574668874
183.1046779213193	200.3684084082881	291.4043779546687	170.48700440579404
195.24970269539136	196.1410862458244	267.1143284065246	164.519051698819
222.85598942039636	199.44275256983343	245.6477625090094	157.9157190508009
231.090701687461	202.0318931577835	229.1783379748801	152.7374378749008
255.34598750264772	204.05504325170307	228.54159262526167	148.69113768706168
265.79747858193764	205.01216419795924	207.63861046668177	146.77689579454932
272.6795971965852	204.60488443151604	193.87437323738678	142.03072050948296
279.783191070788	204.75123897831708	179.66718548898103	141.7380114158809
287.4833482602369	200.33700124087986	164.26687111008334	145.51380651019673
291.4929237278463	197.0025269586364	156.24772017486455	147.30655445594832
288.16168387538244	195.58033832147458	148.57060841437442	145.37106790846596
289.35965279644375	195.77033786636954	141.54573635279158	144.99106881867607
282.13429851574614	198.96462176257012	137.9472085822778	143.1148101092522
283.7093116656296	200.98979233147446	134.79718228251076	147.9164419481774
284.5840459546016	200.33237237157138	133.0477137045669	144.78029738824335
282.02900544348427	200.274614248687	133.78352588736402	144.89581363401217
283.6114627376697	198.01565076796595	130.61861129899322	149.41374059545421
282.21306643716133	192.2532517685126	133.41540390000986	156.5310642364726
279.78543722117365	175.70567011045844	133.70820535938918	162.2514857170051
279.0896470230009	174.70769862118425	135.09978575573479	168.9027891739553
279.75240810847	176.03606688179883	133.7742635847966	171.02609010957448
276.8781377834849	178.56793039675534	134.73176927476743	170.75339803966082
272.6121855660592	190.02693263097194	138.46125223352178	167.0450794756152
272.7146411204172	192.38314615954872	138.25634112480589	162.3326524184617
279.4267204716441	192.07357237432456	134.29195695538732	162.95179998890998
284.6717132837522	189.9582364633378	128.4775325606796	167.18247181088353
287.55790400404135	187.50995238385383	127.3512293112187	172.07903996985146
286.9689703176442	193.969540635779	128.52909668401293	168.5643970565339
283.15996662958787	199.53404254959872	131.47909856193496	162.10339872708516
280.2388934037373	207.69693963963215	132.70419125757064	155.01171205914932
282.57112038547706	220.91493684318186	128.03973729409108	151.21348343775855
256.9131333036946	344.2917258574421	144.2045008913754	132.94277409006094
279.8776897304749	242.03172216779083	133.1843728969359	136.73611852941798
278.50674321768133	241.68167424262887	131.67564152232293	133.18558997954182
271.76911831582026	243.53113537519863	140.97986525532414	129.48666771440233
274.8918107203467	242.3293707465915	134.73448044627122	131.89019697161655
272.261177494511	247.44258086872316	135.7969928092757	130.0612849046872
268.75252386036885	246.90976247833714	130.254797277209	131.12692168545925
273.0142340532459	245.47903407069182	121.73137689145489	133.9883785007499
265.05322143855153	239.25693597312056	133.62747601117104	126.30294414752868
216.03905487254923	330.36719477552435	133.42414200715305	132.359788553431
268.3905599710024	235.70105687233047	141.73139543058556	124.9704943540437
258.119076451499	237.47454142567904	137.08662800500477	129.8194367355425
258.58275716528135	234.28797080317398	136.15926657744004	136.19257798055258
254.67568122818824	229.13255243061727	139.68441303353646	142.2144093075762
248.96452498801045	224.0410950715255	142.22811184338892	147.95801719050817
244.34285090822425	223.28482664857816	146.90182242624041	149.4705540364028
233.36880751333217	223.08379598684152	150.18095844615232	149.87261535987608
