# Supplementary material
Source: ML conference proceedings conference paper supplement (https://proceedings.neurips.cc/paper_files/paper/2022/hash/1c8c87c36dc1e49e63555f95fa56b153-Abstract.html)
Supplement: Supplementary file 1 [file 1c8c87c36dc1e49e63555f95fa56b153-Supplemental-Conference.zip › GOT-10k-Results/VLT_SCAR/GOT-10k_Test_000056/GOT-10k_Test_000056_001.txt]

890.5	665.5	316.0	409.0
886.1573177828376	661.5342364110174	312.291549373598	415.9315271779651
883.8794743698587	653.1004173177814	316.84723619955565	421.3601575788399
889.6199866864714	653.3342599967734	328.55851069691215	420.8924722208561
919.8182688525575	668.724341601049	338.84172561345287	401.8922722204236
918.0219957709717	725.8728942452284	342.43427177662454	369.17689773846337
921.6311387059822	749.7408515097977	335.2159859066035	332.6454798019568
882.5740055111899	808.206507965358	329.19038092393566	289.3365543415571
857.6790897119477	820.6285476219109	310.83153482480276	264.4924750284513
793.3206942961021	761.6991214816395	303.7552680403063	300.87549273928175
771.27183361618	796.392039932585	290.72268581471747	288.61995942282385
717.3644086757959	719.8891075592671	270.8086588833486	332.14392975905673
600.8795061501861	394.74539445360267	276.1858333921866	328.10254316103857
568.4387322473544	431.59844418358625	274.51440454860636	320.949420350315
563.8666957751318	469.56639798454205	283.6584774930516	310.60527874828153
496.75435652629176	497.8584418103925	277.5419750600175	310.1576634688663
495.5793762753998	514.0240385688851	270.64038697901225	287.0780185346704
531.4382459177157	507.4127300242393	251.614727437431	273.95459575243655
536.7572856282552	547.435226565466	240.97664801635176	268.38291781027414
535.1980578384683	588.1424470020099	244.0951035959256	259.1350417046075
510.7880982745442	561.8597389834385	253.29502625031535	248.30846338421662
453.47832496678814	505.4828688683483	257.32619330318835	242.574654082998
393.172799324036	518.9588162913765	259.86328435479106	223.4943565858684
315.83033947870234	593.1441783482403	270.0238932629626	189.2217725635849
463.880439544972	654.8622539867907	247.68234754435952	188.2565982611397
392.7636898844926	601.7488995121751	252.9315391625202	157.49899950757302
418.09245273236667	574.6145695314655	221.5329447037101	160.4105095038241
461.0188291552514	547.3804609169538	195.6359103617496	166.9141519298003
491.86209152050935	547.0606496290644	190.99907508844947	167.5537745055789
498.14162956418204	609.2412293445913	195.37044779676256	139.13182491659012
476.8422718314212	657.2169174149317	195.97630927948182	121.91704999366397
407.69165114569466	656.4181035072017	185.1140991984763	128.48679285753934
470.7345798535778	679.7639787630607	201.66262669913056	101.46875061015541
407.4544029523113	713.8840941739226	186.98057615205883	94.43356167326029
434.94736143068275	734.7495573825772	166.96582696136886	105.15938690503057
536.5587690365301	671.0418770435035	163.85553805650213	100.58563448718496
609.3194071790293	685.0659156187269	167.17703715558008	113.88277272120395
664.5376135338527	714.3576004568556	153.67704457559506	130.20481859968513
676.4791649549488	732.60451829716	161.0612512551135	151.77884345939643
690.5873449945833	708.5965250147758	167.32740543332307	160.3862423013324
663.5228375594345	706.4276340184788	180.17197684005816	164.72402429392653
640.0628733477628	709.9837788349362	189.08140912072437	163.04180553853703
581.9819977275595	689.5639456335949	188.87259365475185	170.63273859653978
569.8752330273419	702.0795641720749	201.766764424592	173.89989809606703
595.143467041947	709.272790205632	192.61387516950657	177.24926550357782
618.8929146606209	679.4143757500219	185.87849869323045	190.3792158307159
596.7937593935446	683.6599069755796	182.6751103445411	187.8133657399557
530.833648455569	616.5448503779269	186.24020621094468	187.85402901618863
465.6286215266123	630.2021113691416	181.15187590185616	201.77814569328172
479.9532273439346	677.4390706529205	194.70011044210605	185.6709128790996
358.5708400290326	488.09263070189286	191.88829521060154	204.983417374362
319.2974004764628	374.2681182890627	207.94419820354204	195.16673297366657
290.62182664644115	274.70187671081123	214.51609523638896	197.52961994978344
119.55153036349354	206.7079294179836	238.76770389742225	171.32925744112134
-19.61363791083528	197.15153746088185	221.0258354280321	171.1329845063217
86.06335665112421	319.67695909237585	219.22137249908243	160.28455287300528
-10.445461574263902	222.35467498103432	191.77722229211886	188.09317443577714
-7.316471649001514	347.5972189860047	239.35850820104633	146.98300882370626
-17.60140468840177	410.1642443891481	211.60451023257212	160.78006715333427
1.096039521959554	496.4165173422683	197.61223451835485	175.49642289913692
14.706702534291594	425.3006676205604	217.3760749300971	176.77262303333367
-14.942479946422822	498.5408966957469	189.89086459001135	179.06400825698563
33.63539095361182	512.6133986879657	226.35793552659163	145.10931676225877
-26.398658706230776	342.523508289473	183.61190049179976	177.10520038826974
150.618257293421	320.29084988962904	215.84208738599824	164.76698499773687
313.1831891185114	280.5472200649632	225.61106558981837	166.50987064524674
415.5450726035251	252.54619155545208	205.61448156787353	179.40891830971643
456.930378241477	249.7459979896703	183.44235596951393	191.0691540090345
523.9895174375322	251.19163405922916	184.96688358083588	176.3828552609226
516.2604883151452	285.25496083804353	194.7347961838333	170.8478037628356
498.3765244864276	311.69274981725397	201.73205830758627	158.25115755156995
484.66378710339416	313.6487001087226	206.52281615165708	159.9979361991317
481.23228554877613	334.5005940754298	213.38581926089304	158.61655074912667
483.8935381173033	340.3117978787084	219.74813467911494	158.67896369784577
488.619393732277	360.8666075403849	216.23647379587146	165.0897471481236
497.55217137412797	354.43194438916214	216.34577166805022	171.96745573194227
495.6215104273413	347.74688502402165	220.20709356162354	179.23239748695838
491.40801619028576	326.7160462907873	228.63408203573468	183.601437674457
467.7085830020113	335.96439019665974	224.17529308747385	210.48019827192047
467.0922205905458	324.4027072015297	218.56389901274954	233.60356426218053
485.53288820585396	318.78212006770775	217.28137710103562	244.84473852982438
489.33203611285376	319.0021617673724	224.2317606242368	244.4046551304951
493.26298020910986	321.14155012270624	231.12665536190667	240.12587841982742
517.3802834810286	310.240112676637	271.9435861483066	217.40298464684713
499.2536669599864	334.17542641118894	254.3369319023807	223.39224446575366
696.0729547214506	324.1483885359046	266.7431136365885	243.44632021632242
705.1547278267201	321.1439849165954	264.64433722946546	249.4551274549408
701.0925919313286	322.062661801381	272.7686090202485	255.71294479485266
693.0790044891004	320.0935001889627	280.4743233576389	259.6512680196892
584.5016718600394	306.587670800793	327.5423003931023	261.14992356262997
569.7342722388395	299.3438058728716	357.0770996355023	266.3816610266915
557.2075890012804	293.2673036603775	372.3382239973507	268.74242333841
553.6101352409601	289.86144266185534	379.53313151799136	265.4913950529749
548.1973339578483	286.9758081669943	380.24063597503874	261.1445659335207
529.5204093590835	284.7899434137434	377.3667740362481	255.4593676559424
531.8636963911165	278.6714889989073	372.6801999721822	267.69627648561465
530.1556789257206	300.19707352356863	355.99477175508196	305.05096002786024
533.7030632367225	305.98195797643757	338.4975653650156	324.6885044263098
535.1298107850629	306.8946827844237	335.64407026833493	333.3063638932014
542.4380308469242	319.3093252003854	310.49299371948484	361.1502611869143
