# Supplementary material
Source: ML conference proceedings conference paper supplement (https://proceedings.neurips.cc/paper_files/paper/2022/hash/1c8c87c36dc1e49e63555f95fa56b153-Abstract.html)
Supplement: Supplementary file 1 [file 1c8c87c36dc1e49e63555f95fa56b153-Supplemental-Conference.zip › GOT-10k-Results/VLT_SCAR/GOT-10k_Test_000057/GOT-10k_Test_000057_001.txt]

858.5	503.5	577.0	396.0
880.3707080316253	505.9492671233701	562.7714058656466	390.10146575325984
884.2744984184847	507.1879625971743	554.9638250919279	387.6240748056514
892.4129051280102	502.50219258018785	553.4723192403675	382.2103072721334
892.7485560012494	495.79298297677195	552.801017493889	380.9554030964126
889.581297537012	496.6086971721254	559.1355344223639	379.3239747057057
889.0389452399332	497.2437952129976	560.2202390165214	378.05377862396136
887.4828766280618	498.63439357219585	563.3323762402644	375.27258190556483
902.1675860784139	494.3860541431213	563.3765983085394	369.0624402792242
943.0394022589952	488.89216175331535	540.0495644251339	365.4460754393969
954.7396421592746	488.63363096697884	516.649084624575	365.96313701207
980.5970059841435	479.58858427482403	492.6316976812143	370.2045600431911
987.4471160607468	483.5576248410962	478.9314775280077	362.2664789106468
989.7341926179798	484.4815540547498	474.3573244135416	360.4186204833396
997.3540098503797	485.2474327114045	472.2331188805575	358.88686317003027
999.570325441414	485.93351769835033	467.80048769848895	357.5146931961385
999.8227077976412	485.18255574741397	467.2957229860345	359.01661709801124
1006.097561945548	484.09668321477164	467.73084673660935	361.1883621632959
1020.2776893883325	484.59263746286655	439.37059185104016	373.2233146990692
1057.9573570381112	486.74337908165745	402.3697080782638	394.49413247934115
1075.5302999659898	481.95513268504567	367.2238222225064	416.6195089103389
1084.4500173425806	466.2522890476249	337.0465270490208	435.6873357648762
1082.1258151128718	457.8495341000627	317.40648118020084	452.4928456600006
1087.8560142906167	441.6981518305836	305.9460828247113	460.64030858993146
1091.172357078163	441.6404291783024	299.31339724961845	472.76637311992926
1094.9997160297607	438.28057990602923	291.658679346423	479.4860716644756
1097.1334774522807	436.4146640876329	287.39115650138325	483.2179033012682
1099.2583330875646	435.8753175617253	283.1414452308154	484.2965963530835
1106.2099824409015	427.1487933713048	281.21954549300216	489.7682457650642
1110.5216868065336	401.73485089437634	284.6261180549792	504.5061868391979
1144.987923688569	385.1548155464002	301.836249174723	513.0540847112031
1142.9568174858423	374.95685601733373	318.6231537570909	520.725311592422
1171.2932241861276	327.44967307186874	340.6819980496133	523.8860768414098
1168.1075473669212	341.14372267819124	347.0533516880264	482.9593680927851
1164.7997549979445	387.2577471535485	353.6689364259798	429.81288097035144
1189.0960340979436	401.4531283591282	366.69498052298036	376.7746776403926
1193.647119241083	417.1284193658314	392.71655397758525	345.42409562698623
1219.34398966763	430.88637385435777	411.03258956041066	317.90818664993344
1250.3381177181006	423.8201721156531	394.86809033701877	320.58465090795545
1297.4739687774445	424.11525903089773	401.8624055005086	319.9944770774662
1356.481013379414	426.7863047009393	385.99411216319163	314.65238573738304
1390.186321531028	428.1003424989415	373.6809669416578	312.02431014137863
1384.0031860812508	411.2919405455607	386.0472378412124	324.06593522072944
1375.9191592716763	405.57732921430215	379.8708314254318	335.4951578832466
1323.3835250327484	405.5637053776548	406.120797259367	335.52240555654123
1351.8942464131385	399.08443697419716	395.76409009186375	301.8162067701794
1361.2530269997026	403.0515913770511	366.08594742532534	293.8818979644715
1348.2148673237293	411.3972164818979	329.89647152471593	287.56828029687057
1362.9207495645564	411.1570357890074	300.48470704306146	288.0486416826516
1421.7689738012891	378.34594451376154	247.66232944806703	307.3322021770927
1421.4300594165848	359.87522577688844	213.4304240106914	326.81877254744677
1416.8126822161255	345.1654176814467	197.2825234991206	288.5513089716924
1401.5431665497804	354.42137678133366	189.73605373437812	270.0393907719184
1356.8170022202585	341.5513141072333	221.48521524707257	238.07634897377
1318.6812991907734	359.9849904924061	247.10454565181578	215.68101781891767
1294.22961525974	365.1818014077971	266.8728725006277	205.28739598813573
1293.4605251376072	359.40546316366897	275.8308180683742	216.84007247639198
1290.2476065416793	354.58466601326336	282.2566552602303	226.48166677720312
1287.363514879207	355.6391046380769	288.0248385851747	224.37278952757612
1303.6323040642683	352.1953612951202	279.6482815301529	231.26027621348942
1300.908336840791	353.12840287601625	277.05943826939784	229.39419305169736
1267.4204279310059	386.2996771974844	280.3007597787987	218.8193286801593
1208.7460788068176	401.31609923129906	287.8161440023891	212.32219476069832
1149.3010174799629	428.8428974411419	288.90031440854443	204.39097924003437
1097.4461034046558	431.0252931763746	284.2527391138775	200.02618776956888
1073.0629894098101	426.3358307288296	279.83612534973554	201.8075638426829
1049.7414235651443	420.95349678601127	281.1191659446234	205.0122165459121
1061.8576104229628	427.22340980869785	256.88679222898656	200.10451200879038
1041.1280917404451	435.29221790376914	298.34582959402195	198.33251895486956
1061.9957029014781	438.87536903515195	334.43022097596645	191.16621669210394
1101.5117186108237	441.08663045913266	378.39637072297216	186.7436938441425
1145.479738250243	435.9640054278771	413.2539028791257	196.98894390665362
1226.592348216765	438.7143456523718	402.35747147849	238.77850987404184
1279.6966917445454	429.56889282884674	376.2618747948842	257.069415521092
1274.8892233782096	454.8811000855578	356.0884147822156	256.09232891656944
1243.5324131645475	460.24674209828856	351.54299194266247	245.36104489110784
1234.2374261173784	496.93779761662404	351.4073506186993	218.79297240019088
1226.4085543056062	495.19313766417963	349.2278706002072	213.36368048406138
1226.7515642252213	499.2493281935005	348.54185076097707	205.25129942541972
1244.0820450832207	497.5405768696089	348.4723316567265	200.02094142026584
1241.4499183133619	495.0644685178943	353.73658519644414	196.41492642247317
1244.0717684834617	492.0872654155126	357.06767223837977	193.79454524510118
1242.8785609061438	482.7065479584913	359.45408739301524	195.39757214033273
1244.090501282342	472.65795572252523	357.030206640619	206.85295019444993
1235.8443231807191	463.28640331366637	364.72159805541776	216.79509022372093
1228.9332721139278	456.107360308634	369.46033314930594	222.06980919409133
1220.7634917669745	449.8607305036007	376.55703462967455	225.32020959062027
1217.355256199514	444.0933158055568	383.3735057645953	227.45176195701237
1235.9352826658012	450.8285466244944	374.8353278274525	223.52192531761443
1239.1160927650276	463.80124728347494	377.821029507463	216.27116775657913
1255.965972119229	470.1270858816613	390.4657869995695	212.8883938003084
1281.8190658374392	469.7185813668419	404.5469684495108	213.70540282994725
1307.9868764427365	473.1132704082876	429.1681207828593	216.5356214400488
1328.0942893313413	485.7244148323633	459.1617544588755	221.40267235756545
1339.36459377734	487.7809067302989	478.8322436291578	227.84246307726414
1332.4369044099524	485.47606062832693	492.687622363933	232.4521552812081
1330.834696062967	490.10284761142316	495.8920390579035	234.43275802733842
1316.359428147101	487.76832402356865	502.2117370333972	239.10180520304738
1314.4561804032442	501.90921675457423	506.01823252111086	245.28681470756356
1316.2348479540067	495.80965771512024	479.15670402749623	257.48593278647155
