# Supplementary material
Source: ML conference proceedings conference paper supplement (https://proceedings.neurips.cc/paper_files/paper/2022/hash/1c8c87c36dc1e49e63555f95fa56b153-Abstract.html)
Supplement: Supplementary file 1 [file 1c8c87c36dc1e49e63555f95fa56b153-Supplemental-Conference.zip › GOT-10k-Results/VLT_SCAR/GOT-10k_Test_000058/GOT-10k_Test_000058_001.txt]

523.5	383.5	309.0	349.0
490.5618628374916	381.2103111151506	301.3743554465727	352.57937776969885
494.37248084694744	374.1673299640372	293.7531194276611	356.3747516071374
492.08911158077007	372.6448635725218	288.09350436909006	349.1933307992424
489.947068862216	368.29756674556944	272.3286395270044	347.8634493135502
493.61392702230955	375.65902209301476	264.99492320681725	342.8892169352361
530.7965372865211	402.2018656269015	247.9495626711824	337.5700798614527
532.8059541273369	395.254558216232	243.93072898955077	333.0772161613961
538.0680124500482	377.45200760900656	233.40661234412826	323.3843841879906
539.4710341657	372.7074251880131	230.6005689128247	324.1338567111827
531.5076183591418	342.6505032482564	237.8225250978013	323.3135725937174
517.8858230144061	335.81024157601905	238.63277934512968	328.1829837908112
454.18277696451014	337.0257442529506	250.36046759114214	325.7519784369482
403.1369418892053	375.8521154640408	243.81379762606034	311.4716010822544
369.6455676551891	401.20345667251115	240.9692724457964	313.1393739015359
338.76294298203885	406.6521012799398	233.07374447110962	302.2420846866786
336.25991671324505	420.1640320425156	246.49235610978315	283.6307822626129
303.3458112449508	405.3121873393236	245.57438546440454	271.6181081802674
406.4082849389782	429.15200327818894	267.4305246335147	248.36502129080452
538.0793758260469	422.8462386299583	296.45791963334904	252.85517345465536
695.425221493644	380.77099283055713	292.94245653576877	267.85539211176575
734.1754465930874	341.5195814394742	339.0515446197825	266.89494028349543
804.3306496473531	287.20177879895743	360.6752336075134	280.2751955079042
861.2966335511924	287.5978460889739	387.7769567016958	279.4830609278713
802.3608458407181	335.22949429861575	390.4413875849384	268.0067787178282
1001.9875959638575	340.4470935796552	383.51319606092784	278.220280614816
1058.6269479084701	359.37960110822223	342.95026268720505	292.29510164018376
919.7178848664577	345.2170134570337	360.8747425877571	310.62436747396566
745.3098847662725	376.3312155947458	403.23660113870807	301.23288417257936
645.661564860606	399.2929385430143	436.5598105871566	299.5690197061449
605.5579549578126	391.91156919039287	482.14016964156815	314.3317584113878
575.996250964392	421.41665435180454	516.3174308288469	317.68695508747066
483.39451819413193	422.2150600358266	518.9542989226268	316.0901437194266
510.7873494687566	426.6410737112069	542.4862224337808	307.23811636866594
474.7837620982501	424.1338613435642	548.2301027118908	312.25254110395133
495.07040000041286	458.16901015633044	521.0797401260716	297.87389635244347
527.113283330715	492.3801798947206	520.8769384133955	267.78133584442014
453.62106602238066	486.988159323569	520.7547599074321	266.30649255983735
460.39172788887095	485.37776123400624	507.2134361744515	257.29562494805197
421.22795050920377	488.9110892949691	490.5201822608176	250.22896882612628
432.63755924285266	493.9699280686866	479.2118422939624	240.1112912786911
445.5773866176787	468.8391922323235	442.16180894373525	245.691248549117
527.2015590748081	459.4208058228936	407.56900106629837	253.8067266149082
407.84180324094683	477.02104958671873	387.66960183863546	249.64050839470423
353.1103512042288	463.10252696123155	367.42684127093077	267.50019482712946
393.2240753450834	452.88646920697755	317.10292718143205	277.9644656049005
450.2705172558633	454.07180751423414	268.57254288832337	275.59378899038734
489.74908560018156	443.4286246458039	223.89288699222823	271.1720441328419
487.27955578459483	482.0733507825197	205.46973204151217	248.39442588381922
478.5359228485656	518.9745327615024	230.09646905921898	224.56835994539227
454.32270537418185	564.9402484153993	242.72318533584962	218.556253450727
425.67186501278525	579.1221297661776	227.40736288650282	226.50124233524028
377.4191895876879	575.1277419432386	223.83842542789606	227.34185453048957
309.39547842085994	573.6672413757587	246.20348444416305	216.05256025077566
400.0381745342151	528.6951216206392	232.26035229039	211.41204406761574
373.1727948718436	530.21638029896	244.08088287179487	201.3844885870845
440.0371760497556	542.8091794147688	222.46639799674483	204.22745972566025
470.49372245379004	563.8396285265802	215.29773279796703	202.47488220900567
454.8014953004896	563.2646155717003	213.79057962084153	203.6249081187654
509.36114921295837	563.9859828631452	203.26604501140628	202.18217353587573
403.1483251504258	521.603368122092	217.7565191643029	197.55732444990628
485.14650236253453	492.77012336706207	204.14431534877104	202.91628331346675
527.3763244627793	495.8750112977174	203.01981701233257	196.70650745215602
585.7460055220021	518.9097790378046	224.76399699503912	194.6999171859846
682.4164914696202	462.524577648757	236.06914978468134	221.65097735429217
681.6471582631289	415.643803111765	208.7786286632101	257.7541513593687
649.7592145023452	379.7122869977412	199.1860642556451	278.2592672370235
643.7775842144243	380.0835078275195	211.14932483148687	277.516825577467
605.9263157755336	385.73449581904094	194.71866848112396	273.89261569676955
525.8652659742728	351.47691940781186	215.1275768470576	224.7545548463114
641.5841744646747	449.2477966378799	239.98368747055446	243.94555054112996
659.6075988255855	447.27076551373074	257.2829219791501	255.520481822345
468.9633918581023	378.358904151049	275.1678855389099	256.05845662818604
411.2936553971278	315.79404587538465	239.9478724527902	272.4507666181318
567.7913524589545	385.13202751987797	273.7565221562734	238.62253750944228
461.9377893976349	321.99034427862665	283.85820432456893	243.9426376193387
485.3183412178698	347.8520475803426	253.7088605010589	258.6662702837451
504.6525786243613	388.74059863067873	215.04038568807584	273.71483152117025
441.54074914522016	420.23072139835597	241.38433863832392	264.51596614398824
358.8894114562645	392.6529387913231	295.17909095725923	255.95271818149632
523.4549465501462	382.3968606786118	260.9552987248464	259.11738746836886
303.1096787878605	387.2379357453333	242.9997718687944	257.6253455917226
336.74696205925113	387.9528796517565	246.67237604745256	271.9614957169739
405.37002332770606	425.70310677515937	248.23184474229595	261.7813196968756
440.30220630691394	427.56680760244126	250.64643151477395	250.02292329443475
434.2412816624425	399.65487184416577	231.23005984318064	250.65490813004777
407.1160179102167	388.1009165747912	209.6086061274522	258.58842242476084
382.50379648889015	393.0949126599462	199.92834409194163	248.60043025445088
303.00869280971784	426.23777162156523	246.06990099434336	231.685996905688
266.3386472467031	449.2689163668036	251.70423051978088	230.760881815606
