# Supplementary material
Source: ML conference proceedings conference paper supplement (https://proceedings.neurips.cc/paper_files/paper/2022/hash/1c8c87c36dc1e49e63555f95fa56b153-Abstract.html)
Supplement: Supplementary file 1 [file 1c8c87c36dc1e49e63555f95fa56b153-Supplemental-Conference.zip › GOT-10k-Results/VLT_SCAR/GOT-10k_Test_000059/GOT-10k_Test_000059_001.txt]

301.5	132.5	262.0	226.0
284.00507249669437	130.45394723475397	257.59080620362795	221.41229576989537
279.22621336711575	158.8990173151162	252.0725743729855	202.2120308336701
273.352043598574	167.52843979201492	263.82091391006895	184.95318587987265
261.6179847425791	169.97183282162678	287.28903162205876	180.06639982064894
260.3953874205069	168.90833791236784	311.6682569325644	174.88204608371308
271.2473275932851	170.54425927697935	335.4811703034161	171.61020335449007
265.36018464984	169.329032399264	363.0169697196091	166.1599003452693
261.1046697564825	161.69779702310953	379.716067041763	173.23430356213942
263.8223064316856	155.24899188300697	382.83554755540183	186.13191384234455
263.8824820801763	145.17947137383362	382.7151962584204	206.27095486069123
248.95841149953276	135.71188415060178	375.88041255818905	225.20612930715492
223.24483327809952	154.56299261474078	352.17728038655423	225.06905668612762
220.88106884633982	185.69520443137128	338.83435081799587	217.01600834909985
218.0052477454367	181.48368530954903	344.5859930198021	225.43904659274432
212.25713000269783	177.2898061200886	347.1546147659279	242.7544187110171
209.97388888063114	171.08346281733944	342.4676333340101	264.42056899256664
206.26901602899557	156.6775064304084	330.80234671381345	293.2324817664287
209.58366123635517	137.8905815660601	304.52732310762894	320.9834648993927
201.20853639050796	121.62197440274696	281.87872750970087	343.67096790361336
208.9423703193455	98.31413803417752	266.41105965202576	350.9300268204306
210.01403930722026	99.18989879006205	273.9668235992646	349.17850530866156
202.5774794048822	83.10195105199662	288.8399434039407	332.37726951014827
195.00818919992594	74.1889050293513	303.97852381385326	311.09560171007666
190.124959765031	86.55762757918112	313.7449826836431	286.35815661041704
172.24158919458446	102.06850110322495	321.16777636748526	274.23237453369666
176.83942008711017	110.54412647417905	311.97211458243385	266.6502179861674
184.26709550404922	116.8925859193815	297.11676374855574	263.058471061756
154.30516076009772	120.95124478777467	295.31757271778537	263.7587333990659
177.49313486963115	137.16401615536822	292.9458435441321	257.735722091127
172.7529727768694	143.33122854617923	285.0907321247038	262.7367329144568
185.6578884919544	137.03206277987533	242.03008386565946	283.9604728615018
179.2366421073076	128.58390640527188	205.21217631555103	309.1335189972757
193.74227580201102	135.89986736451618	160.08392131146078	326.7355723081538
189.21171777719837	130.908054228836	154.0384135693894	329.16588668366586
175.9837767594493	130.45750059746405	173.01076562321472	315.09993398306426
168.69992695700324	119.11146103850473	187.5784652281069	284.55753694944667
163.8157145341255	104.8861519812328	197.34689007386237	253.8409860997426
158.61105081056968	103.01065962767697	193.57345243953887	250.50058826613667
155.17450307925498	108.22658716720896	200.44654790216825	254.02655665423762
151.97114641962213	121.71621639295898	199.7086499302756	262.77035465852924
148.7059600177157	117.75848730376146	213.50521011699774	277.9520002198335
147.63274298751068	114.53212368042838	215.65164417740777	292.1275570127372
143.84306983094268	117.59635049909716	223.23099049054377	301.9467384319724
135.52332140021252	116.58407012592698	239.87048735200406	303.97129917831273
117.71681281983129	105.99881889734385	266.9339525985734	282.3940420645133
96.47804261139623	89.6022616673059	300.7615149985795	237.33735437281348
71.68770988035428	95.76947826486878	341.88291111045567	191.16584377685678
40.888141556724634	105.23160890334464	353.6210980891033	172.24158249990506
11.79636851389131	110.06861274093902	346.5468779149805	162.5675748247163
15.056451509456906	133.98367493647706	332.1411231059937	162.05098334077388
9.015359451441924	109.42015336658017	382.5555471582909	142.17999459528664
13.569900102847527	89.72872795013481	405.62195879935894	117.21185954041886
23.40934236221321	98.18757940628394	433.42845234054704	100.29415662812059
54.36741142243534	114.12753574740624	435.3945555118204	92.37008443027011
68.95353330376173	113.97645176517662	437.6628340056675	92.67225239472936
45.60059056031747	115.04635026020739	460.6758801280606	90.53245540466781
44.351377148708934	119.74750848732431	504.05698914731124	97.48321182884743
30.52868808750958	122.19751602874344	504.9551552280544	110.4146714404462
31.836270640608348	119.21731001954994	502.3399901218569	125.55450383172914
13.84816630388434	113.71060501450455	528.8836712404925	136.56791384181992
12.342708711242665	110.29548428934574	541.9085007172863	143.39815529213755
7.231627745059427	116.32887903122037	510.82672089032144	151.98333668805395
26.75384451563133	115.35726240601198	481.83053142883705	153.92656993847072
61.08966043212263	117.99114790977217	480.8718369796387	148.65879893095035
61.83080886979059	122.8898513007154	450.7019297963823	138.86139214906387
26.532914489988826	123.5856337856023	404.8972126278611	137.4698271792901
13.055668140181297	125.0837187303153	382.1862598907139	126.19608305040374
