# Supplementary material
Source: ML conference proceedings conference paper supplement (https://proceedings.neurips.cc/paper_files/paper/2022/hash/1c8c87c36dc1e49e63555f95fa56b153-Abstract.html)
Supplement: Supplementary file 1 [file 1c8c87c36dc1e49e63555f95fa56b153-Supplemental-Conference.zip › GOT-10k-Results/VLT_SCAR/GOT-10k_Test_000060/GOT-10k_Test_000060_001.txt]

980.5	239.5	373.0	297.0
972.762197418886	231.3771522857212	366.4072108296151	301.7114982622511
950.2256298048144	218.82815331376352	337.9158394165893	316.3002809717138
954.3975067814097	193.7468974772351	308.9696652752032	335.5591623624774
960.8686884869894	191.0425399830267	285.87940112199715	340.96787735089424
961.7891568367705	193.61458765952563	254.45223639060822	335.8237819978964
949.0410964875912	223.88470563324216	233.58046880652455	321.65143433290575
949.645427869364	226.12456916474935	223.65553958927495	317.1717072698914
910.7019636341497	228.03067184912783	233.66187805963557	313.3595019011344
902.2913009581501	232.36725020105365	241.8915810800855	321.8695898603812
864.3422353976794	229.10969824831946	255.79935230572522	337.2404594651784
834.5574941012871	206.87088677865242	259.46582957594376	353.76657974322944
772.2599417642816	192.28767573939223	239.6317057957839	373.3043865914718
767.626883425228	192.8682667231351	229.7078640318682	391.333163066009
759.021187494112	234.88611205921188	227.52521724584162	375.17660766276094
750.8321762765605	239.70310982220633	225.06345273155233	365.54261213677205
711.2652437395265	237.43676172169026	221.0834565591147	370.0753083378042
674.9613140922919	234.23659575684596	219.808341106936	376.4756402674928
637.3874088510598	258.00366017618836	220.48481249807793	403.4128505201304
609.4496155424833	361.65896108637696	218.0463622440567	409.92038389405906
611.1281713433266	519.9887150034217	214.6892506423702	396.2285807926752
606.2077887629364	523.6724245755025	224.53001580315058	388.8611616485134
601.2764519388352	521.4517012971809	234.3926894513529	412.44790287107486
599.6753380704705	581.6552100831598	237.59491718808232	403.025630032393
655.1407743934317	633.8249780553655	266.7209487771891	378.71861079371246
679.4467676378521	586.1689930138185	288.9914826060579	393.02198622799557
638.8549844016848	527.139164590445	295.2114375495625	425.4089441846511
627.0494003935355	521.5399776572272	318.82260556586107	447.9092698920863
564.0570391097074	531.9136084432595	372.6173668641169	427.16200832002164
542.0688494000053	544.63837973079	429.18137226027636	401.7124657449606
476.0044341313009	501.7376427943028	469.7281206276724	395.9318574479223
437.9299842514505	464.6503787957359	491.39681613778816	402.00613013307486
453.4485860405003	411.128239568105	502.5147731277701	410.6883672628129
492.7969439314819	406.32414551872967	524.3588058749076	420.2965553615636
573.9205134959408	403.49267732825143	570.0659799473353	411.1056122281383
295.117120992703	582.785361023277	573.2460442531271	406.7373163968575
466.25654579439595	239.45593592261616	615.3925980268259	386.05342438434343
460.1638069127952	198.31043634935406	627.5780757900274	358.6748946815085
367.448243150803	322.61452933579216	582.2110800012968	371.6379151297093
431.7435411051168	448.43644153541914	558.1266677249536	358.86536760424815
445.8143663953947	452.57191145244633	544.3403488195866	350.59442777019376
613.4842808078993	460.12693684050714	517.2348218581618	349.4950270787806
631.9490960352078	450.3949637648124	453.1347211086047	355.3737380827
687.0675006301321	446.0960202056568	406.4435424382581	351.2624990971108
700.5509146031523	424.7196779342835	367.5522492173287	346.3173225402998
715.3844255348915	425.30100403474324	337.8852273538501	345.15467033938023
721.8755931212394	421.6767539027261	324.90289218115436	341.6467890799506
724.8228762664879	416.6996617442236	319.0083258906572	341.10495602969996
720.458753224632	416.95223493234573	317.34254335031255	340.5998096534556
726.506011205917	416.0033914460595	305.2480273877425	342.49749662602807
742.9412049380951	409.2383863980982	282.5741392714949	345.8310073738421
781.133855441085	396.37748875329714	265.4904469746782	351.7855997603899
781.3800604993917	353.69533830503804	255.30093145543393	378.96726824112307
741.6253618596517	362.25644294924024	265.2240423519056	381.72685506214964
731.3681752050013	373.66721661925396	275.59159543160206	379.1989481813303
726.4124922877394	366.60334594733365	285.502961266126	393.3266895251709
724.443924825022	360.23645466930134	289.44009619156077	406.0604720812355
720.6301817108272	359.9233935185372	297.06758241995055	406.68659438276376
727.2358425625198	360.78476319946077	305.9544214817373	404.96385502091664
462.27689219466424	410.7376682167179	322.12653494831943	405.5735251042754
449.5730822056025	428.06443512484685	324.6521724443588	405.2429650111436
450.0417417523186	427.6655163928452	323.71485335092655	406.04080247514696
457.2991644465596	424.44949251925846	309.2000079624446	423.94676834700476
459.7505922991118	397.3935407500131	304.29715225734014	443.52803817678785
464.45980915167763	376.9993142507607	294.8787185522085	460.8652196569028
471.1806778150995	378.6268856168504	293.2664788038195	457.61007692472333
466.0243317582294	397.8816007181427	315.3329787624547	442.6082624119289
480.2173886103475	401.25151439645543	346.41654777223016	435.8684350553034
464.74793709468645	401.3717634732751	389.65474793214804	435.62793690166404
469.6434944034253	391.2794102783237	418.83823961257286	468.80417872420105
461.60336791852393	384.30922861602056	434.9184925823755	496.71762507231017
464.8973759711184	373.90015756568295	442.99383952986057	517.5357671729854
446.3462341122938	357.5669953278267	464.9810644953606	519.9719741443996
457.7232186521553	366.56362681107237	504.24720182090505	501.9787111779083
429.4423087937184	362.1410557588815	544.962954235063	479.1317186768581
445.669682272543	362.1274489562828	544.7464927175135	463.03978956200564
477.6215382130142	363.69419705645174	528.4155945885548	459.90629336166774
455.0644101674569	367.55407605111435	542.4203046441573	452.1865353723425
444.08973147157735	373.0417531890657	517.4287315935189	456.85815791057246
446.57105216273965	365.8130266430435	497.1304040187627	471.31561100261683
462.74708956766966	351.1476058216637	464.7783292089026	485.3966889184893
467.7963682916215	334.30828910989374	454.67977176099896	504.11281698188355
466.3717424448582	267.08340824978245	457.52902345452543	517.8099544945005
772.8113242989615	218.32082006469204	458.7431876384259	461.8117988916546
833.6764428090019	235.751818092633	467.48512969103274	426.9498028357727
540.0405622607573	230.7267056734501	421.0681146131342	451.0820004780137
548.7493997000844	232.20043394170864	403.65043973448	475.5997721159631
850.5056072317094	313.0378881199354	422.7069648445065	424.60378645698086
948.6033834143586	227.15122284596748	480.0373052315257	396.2250964109818
1024.7370124468948	186.36849460516163	520.7407063742696	381.3052232886855
542.3040166555793	261.95305849967326	508.3627342902407	428.4174794320281
538.4281687913639	245.78312460056128	516.1144300186716	460.757347230252
513.4210767343753	314.47175565563657	535.3733518127817	446.40113439956923
476.5623008986439	330.13152940940364	547.3103622336523	430.5267222046831
431.95897491901434	317.77291915786793	544.287840775207	439.8724138048037
428.9868171636269	314.368172551807	550.2321562859819	446.68190701692566
478.7824866643054	322.8961778357359	560.3885452063183	445.304143295024
516.7396763869716	264.45216473129767	547.7211048322604	483.13349566480747
545.119216319632	98.57556392089168	572.0918390485252	441.68955251032617
597.3161597104416	56.51129554822077	595.1540177484469	414.2940319593194
727.7702583456917	105.00860761431437	587.5722754266869	428.1297318672059
805.1529606645888	111.68625689211848	576.3205248043846	430.72039486887456
876.6831530863095	106.9260009131325	591.434325074016	440.2409068268465
912.4664996811931	93.25837896089857	617.0866999517805	451.37297272005907
912.1965512746926	52.53619416561145	634.4020635027728	432.1645418826855
954.4167715289909	88.92842793235008	616.8442916616835	426.26274301671583
988.2175900020457	144.5829384678972	565.6008495977725	413.10289123881097
1025.1828319857689	142.16899915816452	522.4019880659026	402.56495864048804
1033.2657784747767	145.03956684626291	477.1644675892369	411.3596370136163
1002.2041336839264	140.76477444511792	441.4073964756851	419.9092218159063
933.4013351946635	146.02904465549773	443.3831442772339	422.94366631284436
912.7305099223429	155.16526989699457	457.4408096489475	418.31320841631464
524.5779340482463	388.97346447757945	489.1961135562138	378.12358375641776
515.0614459062684	403.69856771912373	480.9679931359426	348.67337727332915
986.1299250850386	272.60319652890314	437.46117753145336	402.4861155371209
1000.7831495234768	357.95628277241394	434.60402723492683	416.9250331125481
986.27676343355	402.84946351648557	477.02598333408037	394.1845912209023
973.8154277666731	384.78060642176854	501.94865466783415	389.2092958973344
966.8477246203274	384.82533572641273	515.8840609605253	389.119837288046
971.8613314442608	361.8539850059766	534.2909160089755	392.4114356844431
