# Supplementary material
Source: ML conference proceedings conference paper supplement (https://proceedings.neurips.cc/paper_files/paper/2022/hash/1c8c87c36dc1e49e63555f95fa56b153-Abstract.html)
Supplement: Supplementary file 1 [file 1c8c87c36dc1e49e63555f95fa56b153-Supplemental-Conference.zip › GOT-10k-Results/VLT_SCAR/GOT-10k_Test_000060/GOT-10k_Test_000060_time.txt]

0.036245
0.021215
0.021031
0.021111
0.021718
0.021694
0.020874
0.020258
0.020327
0.020351
0.020511
0.020846
0.021062
0.020961
0.020809
0.020305
0.020203
0.020564
0.020569
0.020922
0.022401
0.020820
0.020953
0.021727
0.021907
0.022193
0.022996
0.023457
0.024148
0.024759
0.026525
0.028034
0.026951
0.026321
0.026523
0.026942
0.028384
0.027832
0.024848
0.025256
0.028926
0.028841
0.024173
0.024403
0.023015
0.023231
0.023134
0.022505
0.022728
0.022537
0.022807
0.023645
0.024901
0.026103
0.026154
0.024769
0.024214
0.024848
0.025099
0.025894
0.027261
0.028607
0.025679
0.024630
0.024409
0.023545
0.023401
0.024595
0.025056
0.028672
0.031614
0.032789
0.034099
0.033043
0.035006
0.034380
0.035258
0.035567
0.035239
0.033944
0.040824
0.046326
0.047937
0.036015
0.028524
0.027428
0.033783
0.039240
0.042490
0.043005
0.043678
0.039567
0.039731
0.031546
0.030216
0.030770
0.030465
0.029605
0.033042
0.038078
0.040534
0.029765
0.033993
0.030187
0.032012
0.029827
0.032208
0.027199
0.027218
0.026800
0.026499
0.023380
0.023454
0.023356
0.023319
0.027015
0.026328
0.029967
0.031196
0.032158
