# Supplementary material
Source: ML conference proceedings conference paper supplement (https://proceedings.neurips.cc/paper_files/paper/2022/hash/1c8c87c36dc1e49e63555f95fa56b153-Abstract.html)
Supplement: Supplementary file 1 [file 1c8c87c36dc1e49e63555f95fa56b153-Supplemental-Conference.zip › GOT-10k-Results/VLT_SCAR/GOT-10k_Test_000061/GOT-10k_Test_000061_001.txt]

0.5	325.5	633.0	127.0
4.88816229314358	324.02226265474195	611.9378071377828	128.95547469051607
-1.066112237105358	331.2175821045189	601.7855083885813	125.59525969581188
-0.7210085371618788	336.1390239194924	590.2715391331315	126.57613792142769
-1.600545095466714	335.93893006017436	592.0306122497411	126.97632564006378
-1.2502319808359061	330.69298814801414	591.3299860204795	126.7537355397707
9.279916082558259	329.8571492766661	602.3708773378112	128.42541328246668
22.73806316464453	321.2632852841881	619.0015616538083	134.72639664738034
19.68911778172037	330.12474217307215	636.3400088477781	128.24403929773388
101.09637251982167	364.9895700572606	621.1612390659441	138.01055105709378
124.59185261879446	448.70377463513523	585.5043020116984	140.59248905684382
110.5729523188279	511.40879617768826	602.6573767522677	134.9144304247393
114.91723153679612	546.3850408693559	604.9847470691623	142.07344231122136
148.88377494257918	545.8672466915624	592.9806904278573	143.10903066680822
142.65149125632382	504.75601281682145	583.3703156952611	137.03172999586235
154.4273825094288	462.8449528314126	559.8185331890511	134.5592746177446
173.45040370198404	429.2298752584198	542.5920598241564	128.92093819297483
255.49713324877672	405.76698940953463	509.28990368373707	135.60323205900187
256.09693357753036	387.70742556712446	508.0903030262298	142.56173990261607
210.0911147245962	384.5076887662541	521.4303184410712	148.96121350435675
244.1519069630569	414.0960183058778	473.592332965295	160.7771509291174
298.360475451736	445.8565259512071	432.94683456603923	165.0277742165613
300.22677769016485	477.72581177293887	429.21423008918157	174.70986702469446
337.2546306090756	480.4579957801832	420.23816454815767	169.24549901020578
394.163170286336	443.3972439508174	415.2658455570075	161.7334323964093
450.9127561917871	410.45921826171724	434.73561529833967	147.82811884326907
503.37183309286934	395.35399223642486	480.9769425172699	133.57990000529662
492.8880124945532	358.5994161468537	511.2280307349804	142.10492303689182
511.37486904876914	353.3953618134393	493.9936061839797	142.64338742500502
611.8961761013168	355.2778236145714	533.8640019028356	138.8784638227409
625.0884927346522	343.170033261945	568.2448273847857	122.58373869558002
584.3051847956527	340.01768355235885	577.7275196281321	128.8884381147523
667.3272383774212	341.575110030461	580.5102039525655	136.32525962654614
682.9325561772459	339.4205659789464	560.0328427036604	140.63434772957532
743.7758148535877	344.4478684970469	522.5732510435154	141.10810840494162
752.9096567954834	348.5058404230956	504.3055671597241	143.00293478515545
793.1062996714013	349.1580111007008	482.64513935166417	141.69859342994508
809.47571564151	354.74968236026126	459.36488452309754	139.9738280224749
820.2779450077517	361.820755063889	446.85761297729783	134.92886980190312
815.3866532528256	368.82053246964267	447.81356002973854	129.7559514478072
806.6516849057929	374.7108237562148	456.5394899103419	126.7193756881251
763.4207615833914	369.91202610636316	472.5181772924233	127.50657607998816
721.3788439629029	342.21373444231176	502.300360316876	128.6015071915668
652.6665281312946	305.99731491118416	487.88925273671964	134.60621033484625
594.0462951773774	265.8908221653903	511.12856247697937	139.61827089237406
534.0625436704216	224.97776861059577	542.7016425034749	142.87155756870447
515.2775100431943	199.5340586661152	590.5989199929714	142.1229262824559
506.7686943925005	188.7735809387645	618.6018460240309	141.67329227781386
473.55472941344334	182.34175482640535	628.1865219876935	143.1682937036418
455.1038801118582	180.3638003646029	642.0254968927243	147.1242026272467
416.963040599387	183.2528707693904	647.5024513199571	153.14684925062323
416.6138480153579	195.13839080978994	636.2080881761135	153.36130579362757
401.95785859781205	226.5155498967493	641.8427652494744	149.80024202403615
400.17939167515294	244.33374157027333	645.3996990947926	149.7124009119415
406.27170286701767	259.97778885124353	633.2150767110631	154.1171111518546
430.1361444985254	262.8131994931093	632.7306347651689	148.44628986812305
430.84343218749086	265.632644502606	619.6199829741856	142.8073998491297
429.1354820199242	259.08945569699006	577.4173199336449	144.48913661644306
469.30641012339083	258.61319982252826	562.1484188599222	145.44164836536666
524.4193115217313	261.0437128306684	558.4138477165735	140.58062234908627
431.8846325018166	251.72082693478217	491.37225190852007	159.22639414085884
466.4400334066979	276.6598653359937	432.1676801909282	168.7856978914607
492.23902374452484	303.1420418222108	380.5696995152744	180.4579883440043
565.483964770782	333.7301629411895	338.40109291485345	197.52270269511695
611.4835683859153	364.0566452175699	313.33411091670325	203.8019633744726
661.2500696653689	378.1067948760333	270.48765530643783	232.3882110061877
704.4764240182121	337.9848864737978	255.25753371318257	241.40944069822737
740.1200541260324	275.7242682815376	238.7156428739745	256.4399383298827
758.8657625883236	222.45322181798292	216.8171792976159	261.62783449353697
785.8376866547258	184.0088861889165	215.55743789136523	270.7797971032436
784.9533505008407	157.05252435456717	209.67960929310715	271.1670144297455
761.2430340132403	183.75582533949085	204.20198160055102	270.658673127655
725.1154104312591	194.07157518345232	209.31912055755842	279.86633264282324
680.7017501234028	196.756447618175	213.62624143995623	282.1802422945883
641.2045238244053	241.4350874315511	214.72774687850392	294.0837939751174
608.1171633748029	270.599874271895	216.99543150051977	291.67287703697
589.3949157825351	311.7535452028866	222.48427088948398	297.2435886128079
580.5529789658419	354.8701285282346	223.84115509692236	300.8088638048258
577.2429194654583	396.9778730798849	222.22132620071721	307.2328015682248
576.4149353706346	421.7587301261637	223.87729439036445	299.22582312373027
575.1252510333107	427.0551227787583	226.45666306501215	288.6330378185411
574.6765101506692	425.11785553656955	227.3541448302953	284.41071115740783
579.1840526600232	424.1162704180133	226.3858170411675	286.41388139452033
586.6069937171649	390.05476638333596	235.72515956464815	298.10469864242555
607.9573430757364	290.172112023032	234.9865022602001	296.45220858209865
610.8266751680319	210.17736315093566	229.24783807560902	306.0497693136441
613.7142622400801	219.15403921073144	223.4726639315126	288.09641719405255
611.5014008789361	241.967467033716	227.89838665380051	282.67016117057904
609.4551675760408	273.35477168017326	223.96197835603883	284.12655110608347
606.214540130348	278.8274642137566	222.4558756098519	289.1558813140616
608.0229702970382	255.52982174601902	218.8390152764715	287.5127139147462
610.496381347307	242.07492175962705	213.89219317593384	274.6440762342288
607.1566768391259	242.1981648093743	212.89300367950145	274.3975901347343
606.1457957069724	238.4301311476351	207.25619497468335	274.2750864890877
606.3925390183329	237.25288859753385	206.76270835196243	276.6295715892902
611.9199756567582	238.0284278627142	203.30040761059206	275.0784930589295
611.0517121598144	236.2186240908536	205.03693460447946	278.6981006026507
607.9063707053676	238.38528356158128	211.327617513373	274.36478166119537
604.6809913776126	235.43928346680383	210.14579924223105	280.25678185075026
