# Supplementary material
Source: ML conference proceedings conference paper supplement (https://proceedings.neurips.cc/paper_files/paper/2022/hash/1c8c87c36dc1e49e63555f95fa56b153-Abstract.html)
Supplement: Supplementary file 1 [file 1c8c87c36dc1e49e63555f95fa56b153-Supplemental-Conference.zip › GOT-10k-Results/VLT_SCAR/GOT-10k_Test_000062/GOT-10k_Test_000062_001.txt]

562.5	369.5	420.0	349.0
535.5784480906353	360.7334275172494	388.16182692804165	353.43581969540287
549.530958806967	357.1582905175241	371.9323072121881	348.9105919780437
555.9420566339383	338.5697771158801	359.1101115582456	363.3868002885889
560.5400025225521	322.3139990095041	338.53636549038765	373.1426479200806
561.9057057960982	323.3450448443401	335.80495894329533	371.0805562504085
562.6769968328422	324.8174431452344	334.2623768698074	357.00717009180545
557.4209523182136	298.5501708424403	312.1204819144993	333.34908540007484
561.3847955330125	304.3215723638385	304.1927954849016	321.8062823572784
560.9417847448484	300.85765635276675	295.22153947354315	318.8768367917352
565.4196264788275	296.10741887427275	286.2658560055849	318.70826506610126
566.4640255426468	290.8573845981391	284.17705787794637	319.68460744602135
559.1399537935536	268.0862887531184	289.31967972482863	327.20471253084554
542.8842216547511	239.83466122843572	253.89991164028893	344.89012051612826
552.8657020399755	175.8511473318008	224.5344436542812	378.83207615380957
560.0581314038359	152.1844038546833	210.14958492656035	379.046356958386
570.4263848010298	159.3194350982335	189.41307813217264	383.142046293915
575.3672347097199	164.62023641872142	179.53137831479228	381.4270878574749
563.3416273860948	122.78500708109317	168.82349838041466	404.2691310148829
540.0697626557853	82.76737430440068	144.70628955080224	422.47607556431524
539.26180807606	81.17295435288105	120.34194897729847	425.6649154673545
537.3842330260424	108.7460220159926	107.58589170011214	403.54119489557445
538.2033409031478	110.64177199763986	105.94767594590111	399.7496949322799
549.8900482998422	74.12251889145892	97.81490383852748	411.8256304005819
561.7966967848668	74.9568079671925	112.17903754792079	394.8860799773378
549.8448930193042	111.48524944548944	136.08264507904607	375.51029937048474
539.0176687268334	104.42720760422716	157.73709366398742	366.1276842943126
569.7887339332334	78.93813369282401	160.87504337363953	360.5107620099735
586.0116628476252	93.34636994589721	192.90057903531465	331.6942895038271
603.9335831827715	113.78062502074704	214.3778614174273	315.39197494801545
598.8146672262534	100.93031832853461	224.6156933304635	316.1780973276765
636.110287556337	83.9768364294901	217.91138049506924	324.62746319147567
668.8093155410879	101.14368523621988	220.53330795882957	315.8012593654894
678.4496701486056	124.63205385164935	209.6654349553882	302.475866981007
687.8478668208767	94.71536616484929	198.9010821833395	322.149039492141
749.7059080370827	95.93750607790193	205.5517881463212	319.7047596660357
743.3802629842759	119.05621278990921	218.20307825193504	289.9128977067499
736.5951357464814	126.06391282574157	239.75521236192594	283.8793772694871
695.4196953539201	129.86214935162016	256.1949603178059	284.5217958213853
662.5303788742947	154.61492370648403	262.3874737035383	294.6023666851761
628.6435712438689	176.27946626567933	268.7863138965656	286.3445816055422
603.9977265425478	175.6957810100788	256.89012447114067	287.51195211674326
610.7057663475771	138.5083234853957	234.90417510015277	301.89777883960414
622.850640959344	118.49587969217544	210.614425876619	325.04846727233394
595.4178785831411	115.23720966781678	206.768327164666	331.56580732105124
595.6219674118762	119.65577299637661	206.3601495071959	322.7286806639316
591.0273359384513	116.43056819603169	215.5494124540458	312.6159464363859
637.2870818206625	73.43155341514813	214.13603725600035	340.63735636500417
664.781897534101	85.48934836665578	211.2241326265966	325.20138759490106
669.0806087125824	127.38578839190126	211.0265489951697	300.2073786231606
662.3666913857927	136.68133611597847	216.43413795955306	289.6365288642022
671.0574828336271	122.8253657453051	199.0525550638842	301.4509781432809
657.7428072235591	127.96578405321193	186.47892011982887	306.8513359931438
656.3710575808885	151.68583699229123	181.51147233712823	297.9659654551941
618.8632201618319	127.95911621131023	196.5676161704934	300.4497587635951
650.7520644004229	97.66661975178113	187.27923497064359	314.3296311592258
709.4166211280698	95.49783039909099	187.48636546104345	318.6672098646061
725.9430935594286	128.36379057383658	178.14455991278209	300.35756814402737
745.2076181099484	148.39385859705465	184.45812421488654	282.71873879916325
737.9657347081115	140.82636137164386	198.94189101856017	290.53741349556975
745.4320182761082	99.63016766195881	184.00932388256695	319.208154479914
738.2874304438816	92.6076887082881	174.73993210592812	333.25311238725544
722.8066170468388	120.67240651064017	181.99578635523375	324.53522187211075
716.5413306614633	110.60784259241905	194.52635912598475	320.97181128146644
749.4243656819712	96.7942735904856	193.21465618500088	340.54215339782934
769.4741922165625	102.04807723518746	219.7164779962454	330.0345461084256
758.4073246446516	150.58044047219272	241.8502131400673	301.8802883534122
763.9360877972283	153.4199920337064	230.79268683491392	296.20118523038485
799.3705501997395	107.13286420767281	193.05624146461867	330.79360187167936
774.4061434062029	103.61948336233306	193.91704072830186	337.82036356235886
764.875044964863	130.9056719729537	204.68243649199525	324.7319919360484
749.4855678952877	130.72437580787323	227.1779161380648	316.8111097731281
768.5526158991768	87.26154351808057	231.73199119583126	335.4357006478417
831.1906571716206	82.43300273548496	213.1883508968125	327.30404183872145
840.8058288881493	122.42467420789143	202.4221375220685	306.569609302102
851.9818700197509	165.51180477202095	188.04361383693694	284.18381679841417
847.5551311600964	158.46144783374268	189.4990690951202	290.886508213845
884.8529643463406	124.17209743689486	167.5636098125322	306.80500191764025
881.6295744935762	121.40322792597561	166.62091140720543	304.9532628286231
854.377558399164	127.59386880745708	169.70258343414287	299.9180325173583
837.3948205850968	126.90598172352833	167.0471548353515	308.617987530601
868.7845612143004	123.72571592955683	156.11934581135898	314.978519118544
870.3302520556458	163.06344581054262	153.0279641286682	294.8042831101803
873.5645424911421	185.19851182330984	153.5229446618069	264.46127389290814
873.5451747674201	171.715463093834	153.5616801092509	252.28211331372472
854.4042179041942	143.57489282941916	141.09324115163906	264.15669524399874
828.8815568547802	130.38512236417296	135.36751045351872	277.9204466640582
806.9790321958181	155.52163872043502	127.88496024245742	272.52406353939625
782.5923119328666	159.79535252798001	127.04279058951553	270.17858719666197
782.7265564558356	165.10785803240353	132.92738733274163	259.55357618781494
781.5509969793881	146.18963548473852	135.2785062856367	272.9906119136358
800.1179821545724	124.22150338704387	142.50588623950813	278.90286156253364
792.0893097877287	133.15193419275147	158.56323097319554	274.1397542515725
786.3785144166126	161.18365001467464	169.98482171542764	265.34856388646926
789.8852474794132	153.78498465355625	156.15695843176553	266.5171002925845
803.0650990217849	121.80669992997477	129.79725534702226	284.2784427213797
806.242481757108	134.70660632793854	123.44248987637613	271.29147356612265
801.1683299169295	166.33173912258945	127.48449416339284	244.67900433686304
793.1086773200544	169.06945119427098	126.24058027623241	233.4158404998632
814.6362463651258	121.65291095518215	122.39005269437155	244.2390413174363
