# Supplementary material
Source: ML conference proceedings conference paper supplement (https://proceedings.neurips.cc/paper_files/paper/2022/hash/1c8c87c36dc1e49e63555f95fa56b153-Abstract.html)
Supplement: Supplementary file 1 [file 1c8c87c36dc1e49e63555f95fa56b153-Supplemental-Conference.zip › GOT-10k-Results/VLT_SCAR/GOT-10k_Test_000063/GOT-10k_Test_000063_001.txt]

607.5	663.5	145.0	128.0
603.7974161398607	664.8365066530371	147.10803950126748	124.32698669392587
594.7915863593834	666.6403114936448	156.57809514744167	120.71937701271028
588.806569486962	667.0493579630377	159.83262554132182	119.9012840739247
586.0091463362485	666.8085004966089	161.03344842500076	120.38299900678224
599.1201688009851	667.5342794650965	148.07194660764978	118.93144106980714
604.5483466459946	671.1943456486287	141.41410344147266	115.80982122658455
603.6518107888153	671.7062530027478	143.20717515583118	118.83175680502458
605.168839313858	671.9047131491047	140.1731181057457	118.43483651231064
600.1814664936112	670.9280642192535	142.00992856990052	120.388134372013
600.7181826122131	673.7281216070359	140.93649633269666	114.78801959644821
602.0951923112749	673.9284299554128	142.20436793895288	114.38740289969445
598.7604769609358	673.7203357107189	148.87379863963116	114.80359138908207
604.7000320769921	672.1618577586191	149.4258630951116	117.92054729328174
617.9732406769879	675.5555128868343	143.89376996435072	115.3361018506975
630.3289394698561	674.6870013670462	139.56318509690976	117.07312489027382
632.1395565158371	676.6991919857738	139.9795861222715	117.0863787701422
633.8148361283863	678.4350408154686	140.67329448644625	113.61468111075261
649.2949554189432	679.3264298816516	133.70623474761422	111.83190297838658
654.7226389622739	678.9408915192749	130.5766763573135	116.46588405132022
673.7299812492454	681.6778979533188	123.67276857576188	114.8807182822814
674.817260534043	681.2685688808833	121.49821000616657	115.69937642715249
677.064056868576	680.8891463337848	117.0046173371006	116.45822152134943
669.558608172128	679.1848477145555	120.98578186335989	119.86681875980801
668.0577836785384	678.1111301942889	123.98743085053916	122.01425380034121
648.1340190283664	677.4936960501095	136.71688229228016	123.24912208870012
653.0718168266653	680.9198076447065	143.21160330347948	120.48947805145534
653.5645540359948	682.3276803566224	142.22612888482064	121.82264967847412
641.5280627863632	678.5029385294708	141.36824882936008	129.47213333277716
628.9206766887853	680.5439669468452	136.73380179140867	125.39007649802849
611.6714113019784	684.538751106756	134.0896150459849	121.52747679143339
593.0723877149373	685.1425750040156	139.09365775953484	120.31982899691417
598.6806390770709	685.8189060742699	127.8771550352678	118.96716685640561
599.1995107999093	686.1510119514281	126.83941158959092	118.30295510208899
586.355278222638	683.3107268703665	129.3683296884078	120.12360075492482
580.9960159993527	687.9800402516819	140.08685413497835	122.56997118475817
578.6014761174644	686.3744583410296	140.74190622798645	121.64710733529395
585.3510053472321	689.7138871635557	127.24284776845101	119.09762383421157
585.507295176194	695.5685475125443	123.05142080073945	115.14599775580979
568.6520853792218	693.9836181975484	126.75684888304764	114.56523244684729
556.311668065321	686.8749071605442	124.84373781308429	113.58611412213261
547.496734628491	687.4650584085858	116.19732429975411	112.40581162604937
535.7152381533665	693.9362344997321	118.16076368381817	110.2632362268494
529.4107779679955	695.3746093090433	130.76968405456014	110.98317741512443
555.4444492650582	695.760200204627	116.74176599959475	106.4080531700408
573.7254574624715	694.1040818772293	115.31203211291529	106.20706157402148
589.3322487046033	697.0281913775889	125.95148443953914	107.33434837511714
621.4507544511413	699.5717275137677	120.44834221454289	105.91814293201448
648.5452985304779	696.1304095389509	119.7041053673723	102.11180861934767
669.1048936949277	693.1940769131709	116.97949501864312	94.02280842357281
680.6352005055517	695.3749533055975	113.82658528440899	96.29695693439083
689.4964050406339	695.3489920512429	115.9410890389698	99.65503158055438
690.1777809104765	696.0099843756036	111.18554540428416	98.33304693183301
687.3551158479702	684.404835992317	106.93701642064542	101.75562548110373
678.962218633726	687.3685763819556	100.71909547119739	105.68687986379945
666.6131876993953	689.8113783062144	99.41513791329663	100.80127601528203
654.6431364895351	690.9382904496356	98.13127631900463	95.39445622668791
635.7357397131343	685.6957065004957	96.32761902758733	93.68933155751566
626.3914227925345	687.6931682247695	91.07768636521118	92.6867289219152
683.6068528831107	685.2579461482244	89.50892875139297	97.55717307500522
679.9332221550543	680.5816717029857	73.29426090593323	103.9644808027862
600.4610155988483	681.7197336050491	79.28310587430613	101.68835699865943
588.034162577508	671.0844702303514	81.38098280498086	103.04753327504989
580.6632916901	674.3173282480514	81.62586871368323	102.38055958609527
569.7776608696597	667.5827440707272	83.14524058169414	98.49096527828405
547.3365269091327	656.5829297688781	88.01747709067719	103.3434375625232
522.7655414034389	658.0987710659205	91.99234044236832	103.32289547908485
509.5213971725922	668.6058365830438	90.8098021207438	100.75598230038338
505.6134494855346	673.7621738316419	92.59416293476806	90.44330780318708
514.8975784987964	670.964505880738	94.2029156137642	90.27378350341803
514.7796638989121	664.4765928740186	94.4387448135328	97.43964926185637
512.9175975144533	661.216876975443	98.1628775824505	100.93746645489006
508.4637302827118	664.6030617404698	103.9352496715565	94.16509692483646
555.9620852111061	649.9654976046163	105.61953615620584	98.4902906568175
569.4532058794615	646.347813023445	101.13415913595067	105.72565981915994
580.4994365473003	645.0639392645356	101.84373804168428	98.52110437637407
512.0708077371482	655.4307865426351	99.87028673435128	99.87411351320804
510.33848286883455	650.0443636845994	97.04377425874586	94.91905369869727
568.8352983537399	630.8451339026968	97.9467675862229	103.08760959653118
565.6597831784003	625.3867155386046	104.29779793690211	95.01062485964741
505.8955053830148	636.876589914486	104.58754716304628	97.13378271096404
504.4811893040643	637.4862149766811	101.06383604170452	95.91453258657364
490.2803395337424	633.5421208687017	101.54972653434345	103.80272080253266
476.1178279458505	622.6887455023663	100.7701163616729	99.63868633657742
454.2782571578715	624.3327574319782	100.26481605683966	93.1946309144398
522.2696038370883	628.0712476871186	113.5408651479199	85.71765040415909
511.5328171669935	614.3534633419229	113.10253252368284	91.24131313012356
500.6938560889527	611.833722576538	112.28661166668265	96.28079466089336
