# Supplementary material
Source: ML conference proceedings conference paper supplement (https://proceedings.neurips.cc/paper_files/paper/2022/hash/1c8c87c36dc1e49e63555f95fa56b153-Abstract.html)
Supplement: Supplementary file 1 [file 1c8c87c36dc1e49e63555f95fa56b153-Supplemental-Conference.zip › GOT-10k-Results/VLT_SCAR/GOT-10k_Test_000064/GOT-10k_Test_000064_001.txt]

140.5	236.5	130.0	38.0
149.84642436922806	236.75628720118308	128.11908688151794	36.487425597633816
158.87209940410602	237.1143150003425	127.49629370371508	35.771369999315034
169.8811056407643	237.07692673156163	130.1544790737906	35.84614653687673
188.86213493573786	236.67026402880293	129.7898546761621	36.65947194239416
189.43959510936725	235.0849030369991	131.1515200844504	37.31360817045473
193.65017014647498	233.54878355602435	132.922470885173	37.83782191366975
197.4278290239015	235.44032076734698	135.69840047161225	36.63755932634754
207.12541953234157	230.73308019555392	134.49934991808817	46.05204046993366
215.932713019002	235.15371754588708	136.18179295053267	42.72420291377174
218.48562977139412	237.94063488571283	133.79557541322612	39.869984201597944
211.22605337056257	246.918019019946	148.31472821488921	37.71318406083485
227.08931950644694	246.8100455178889	138.96528625445225	37.92913106494907
232.51909456812373	245.36969120273858	138.78463106729515	38.14011596120065
240.05883077039258	243.50567252187605	139.73199240005994	39.19701436670863
246.1365152133203	240.1536798022036	141.09811505643347	37.7881048807161
252.3095909266085	230.4250197975584	144.9345770794633	38.365709198799266
256.9407581649836	228.22672341092346	143.95813004281356	40.00033949203574
260.83850143558993	226.3508124048515	144.4994410120428	40.97322900069902
263.24682312373034	226.35602370934816	145.29234214265858	40.96280639170568
272.8199596465615	226.50067801293852	143.04065699187086	40.67349778452493
274.7854744125775	227.7476023212382	144.66679801270976	40.95823444436111
283.2009040767073	229.3551433044061	144.67705984258572	40.5500060043812
283.08886557552995	230.58495486037674	147.7004997250341	40.889745772533615
282.5386215039479	231.6130079832134	148.80098786819815	41.68199423355496
272.15568489586883	241.61176778447282	149.41588900643472	41.83544670895776
271.3047066911571	242.5963798527259	151.1178454158581	42.7564770104762
271.8460894982099	243.8076288870428	152.966570951913	43.26547009200289
277.494002623896	243.8531083405886	153.53910836709937	43.17451118491131
278.54371075941253	243.67160410064585	154.41315907398902	43.53751966479679
279.1615831550707	242.00920024213917	156.1700010420365	43.869740622446464
278.8640889442337	242.25421127114555	156.76498946371044	43.379718564433695
265.435439284954	243.74434667548468	159.43992445058745	43.422243297215715
259.21231655500065	245.9109672281257	159.6410395768883	45.21156735873656
259.29336167079975	245.92858610408487	162.5765941275074	45.17632960681824
259.2772716464398	247.748416318017	162.60877417622737	44.67505753981243
247.42480397358736	247.37952912506913	164.4076071448347	45.41283192570819
247.71457099709613	247.41073306847883	163.82807309781717	45.35042403888879
248.30830743944907	246.9640139653212	165.7998926156559	46.24386224520408
260.7724308495567	246.264882193678	166.502287410265	47.64212578849043
273.84107935024815	244.6883637204962	166.28405582789816	47.555279557477036
284.54744295686277	234.5729061118091	167.51759698140225	48.375107603365635
286.6266033203689	234.26835579343043	169.89506424961928	48.98420824012295
286.0134568485143	234.51248732792777	171.1213571933284	48.495945171128255
285.77795082997216	234.67495427446897	171.59236923041277	48.171011278045846
287.2464185028115	232.51690851090714	171.97702694727747	49.16550974262617
286.9494991436545	232.60697978852573	172.57086566559138	48.98536718738896
285.5963450121999	232.82098983749498	171.92654862464542	48.55734708945052
270.85825394692915	233.49376801393905	174.73446289074803	50.54532421961714
264.72229055287306	233.4040213260442	176.77553436223036	50.724817595406876
264.5349386711398	231.8174712859398	177.1502381256969	50.45546087011939
268.79180814409915	229.98326079840822	178.96465282873444	50.681163962197154
278.33517442623895	227.62064879248365	180.71316323422735	51.9338474790842
265.2023910027205	227.27789732342916	182.33443652171306	52.619350417193175
262.7344412917339	228.3812035892046	183.7140419444813	53.96903188484721
261.6287174411427	238.18425447552693	182.32456521588327	55.96847669088538
245.25323270410414	236.99599956063648	186.12872100258	58.3449865206663
230.25493211672347	240.31905172895281	186.395915411228	55.41505802979775
227.9452355446825	241.2889421266387	187.3495825112031	57.14100327853279
227.6826717151296	252.12737812375806	187.8747101703089	57.73150706536289
233.03576841129535	257.6775034376223	188.35730093682005	57.820040596477014
233.88129697924632	259.0066897867037	190.40431331840364	58.89973741579974
235.34551235421605	256.2541439075281	191.26292058993204	60.61779115268314
232.02582705844466	238.29855399875174	194.0713788211561	62.05075972736731
206.15769052830078	224.3592793871086	195.14458997068294	62.64919869101314
189.78279014849136	222.40428705311035	196.5071443018536	62.6357775554536
167.76684649979046	219.60053141366075	197.17147222546214	64.3007834367352
166.2471163579685	217.59765624087112	200.21093250910604	64.32399126221915
167.5177253485631	215.75087574849087	201.6958678126314	63.991398962265194
181.1033474545505	212.34985819774573	202.81242636279228	66.75231938345033
196.31127323083956	216.73550959639005	205.2582004414485	66.1964229939703
213.05959082584334	222.88883466925512	204.81966686849825	66.28656095463667
232.20476131320274	221.72224669234163	203.6785257856871	68.61973690846366
238.65994615437344	223.89970274757604	207.38496371661853	68.41902670131307
221.0526256554521	237.8380335719127	208.97338163962007	69.96531024312577
216.51702608106638	240.50875889198687	209.5362131557168	68.87804341931471
219.66574835373598	239.79507949186242	211.72333786974332	70.30540221956365
228.54332330555883	237.02143885191222	215.46590243432385	71.55314060581877
228.4659764613607	225.78185196021124	215.62059612272014	72.15413664854925
210.4494857344336	222.9209356569717	216.54290784935472	73.48713553912586
195.11226388551128	220.16894415870135	220.6594146304522	74.56479571620874
192.82968447582164	219.4384547929382	220.71993650857107	76.02577444773506
192.8112440598016	218.68970771492872	220.75681734061118	77.52326860375399
191.91627436625376	216.45124161382483	222.54675672770685	77.440280925509
190.7302709930076	214.54353619471527	224.91876347419918	76.6717362521704
193.1902889021356	212.3336550961158	224.60250337645573	76.48772272885675
194.16771534682832	208.96616970018547	227.24356251724117	78.62678149054648
188.93443408548168	207.41550098411554	228.36502869688542	81.72811892268633
167.79444817807706	210.0439175290191	227.94095193069896	81.21618011965653
150.61147178107205	208.6415717578255	229.2000306682163	84.02087166204376
150.1424804736267	208.0847551980995	230.138013283107	85.13450478149578
158.31172191506144	193.30336070194133	233.12695350853363	85.706159111368
174.57833777036296	188.7914147591614	234.78851604295892	89.84508039049523
183.99960295627608	184.00092051739892	235.879268605976	94.44274814030936
189.3357034075076	181.1877892491253	235.3696892390908	100.06901067685658
193.63939620734004	184.10074742400596	237.11021293217357	104.59100361984285
209.2353359001067	187.41761744845832	237.59223268018488	108.51522994878638
216.32813008607746	185.4940117030443	239.47138419895794	112.36244143961446
226.83711970666664	185.93275798985184	240.25158145501206	116.93449299030746
206.71289788126978	189.65755089749786	241.71627884072552	120.56597753646687
186.4139330128928	187.48978148707783	242.93979893836067	124.90151635730693
181.99183459489288	184.82853504946777	246.06626799259567	130.22400923252707
160.80229060222987	182.3648209187519	247.4588953817351	135.15143749395884
136.62700861255274	179.93515269560174	248.12855159654703	140.0107739402591
130.01560675626223	177.0473422284443	255.29850004316563	145.786394874574
129.2024612429313	174.8783788692068	256.9247910698275	150.124321593049
128.26702026268288	175.55496291133895	258.79567303032434	155.12597488627364
131.80933532926605	173.6688396728518	258.1781801965028	158.89822136324796
153.6997030111483	151.51087919970854	260.0475664187469	164.08546666438428
151.81840448943314	126.44736819111651	263.81016346217723	167.7578089396709
123.5370164983475	123.71687845077744	266.3398812909063	173.21878842034903
119.73876546444848	143.24576389305284	267.05314343936334	175.46045705184434
143.64484716236908	152.07501652408672	267.76006985608996	178.5958474237342
167.2366850933034	150.56836038420428	269.53493436255786	181.60915970349907
184.68273504950014	148.5040949796205	269.99692474171445	185.73769051266666
185.15077438904848	146.6461977280711	269.06084606261777	189.45348501576547
159.73813739767957	140.74231566555736	269.5320463485947	194.06781004125565
149.0195966169752	134.6127143397755	269.13943620920884	199.05044879255448
149.5417081804025	132.3019924805738	268.09521308235423	203.67189251095786
176.0407442797307	129.93719082965583	266.9815967368995	208.40149581279383
190.57253064562843	135.08817477638132	267.8065217837601	213.04377680867088
211.79494582186138	148.09965005619972	270.722642729288	217.26146044769666
210.98112376533413	145.32779232039027	272.3502868423425	222.80517591931556
214.921011523539	147.26533212142994	272.258470236884	226.7180552281875
210.43708768735266	144.293119765428	273.37660595858137	232.66247994019136
178.38665649691225	137.64927196278728	273.77611959341556	237.98750695221702
120.3442360420415	132.40040089011285	277.1001795433012	240.43090760043333
119.51343411876664	117.06927095207311	278.7617833898509	246.6582282559964
109.10462527080827	103.1026741412488	283.03846374692614	249.78001586938274
83.5677704650384	70.2129428185032	283.79164567426943	256.85219621664476
77.04984245077372	59.157192977459204	288.31606828644686	261.940829066029
62.97206852796484	56.2062728292625	290.4826942994563	267.8426693624224
61.702169081559276	53.642640180331	293.0224931922674	272.9699346602854
79.29967337497638	30.3070580179226	293.47495645210125	275.08175917676715
83.30689289514393	27.47480956247921	294.41299507640394	280.74625608765393
88.55782701556362	26.16075677880545	292.96811355492844	283.37436165500145
86.38377361372127	24.7049782347174	297.3162203586131	286.28591874317755
53.38900546903338	38.44041913342056	298.974535350844	286.38556035883335
50.018856294583486	47.64777889125122	296.49709745051905	286.4063133416215
50.979866740554485	65.62091301396026	294.57507655857705	287.1769946948106
82.68087709459095	64.2633916293399	295.3019090374253	289.8920374640513
116.26060360532068	63.56821989278865	292.65133577644406	291.28238093715385
112.0546766904975	67.92031378859664	291.867389361257	291.77399339037123
113.96999565189	82.253340819577	288.036751438472	290.6815478740849
115.02655812232402	100.77329562880388	285.92362649760395	290.0962391022379
129.54059041312365	100.32608153087739	284.1089203737175	290.9906672980909
135.5728371515856	100.79967036738464	281.1009512125304	290.0434896250764
166.48022219879897	101.07777936092214	282.2450562448431	289.4872716380014
182.09235896377254	102.72255487489792	278.0312170690005	286.1977206100498
192.63494522022864	108.9549202490187	274.7165693593448	282.61825226343655
198.31981591003137	119.52445804537285	272.1235337759888	279.0325882632271
205.21683045174544	120.21276493753501	267.0089581700169	277.6559744789028
206.91511758778222	119.32377950193745	263.61238389794335	270.85695454265846
203.6279535944146	96.64213837030604	261.77006521454547	265.7203567851227
193.1170354039431	95.04970395726781	257.87126896089813	260.5983480663357
187.30530295443668	93.49917543443807	253.16503861530137	255.53455748969034
184.0108149837542	96.10505544539198	251.74301902197348	250.32279746778252
164.92182025096926	90.80492446529234	250.38830657360455	245.10997866240626
138.2308032649216	68.61479717940863	249.14925712780524	242.67216173312116
112.81975111856372	69.77579377545445	245.7560024754847	240.35016854102952
86.81756206897457	69.59403831534519	244.17470191794652	240.71367946124803
95.40210649117364	78.09431536183018	242.27759081751503	238.9851031122447
123.84217408107727	86.72066743960808	238.4497256851954	236.89019039882825
152.60654104327094	87.5546196181065	233.32059704446345	235.2222860418314
169.35051143271374	83.14075553220175	229.34710781077828	236.6714013273408
192.8380407417236	74.28663892673163	226.40393451499824	232.36369187716122
203.1133298297995	74.16811733193398	220.30242558419775	232.6007350667565
229.27029446902617	74.18398556171672	217.91022704784402	232.56899860719102
255.89819447831255	79.28373286599427	214.3069809667657	229.46272598970654
282.25077350346004	88.18027833331803	210.5141853243526	225.64459574302526
307.1630835020218	99.78375405688622	208.76282778923365	223.0404710653194
313.2266809991444	101.10134389023797	203.43475536600488	220.4052913986159
318.09189549583795	105.78417020355437	200.37763504689562	217.712947446261
316.40493673657636	111.20852560902684	197.1688639675787	213.44692523315624
317.8903487156609	134.8952325406384	194.1980400094096	211.32935107025136
335.3818867484049	142.5791748763286	191.13913071400896	208.73113310690593
340.2006615597028	165.11248070603835	187.79722689757165	207.7340420905953
344.5257673561848	180.26434605819023	185.3738756865119	202.33775291390913
346.8875517594679	181.53140632808004	180.65030687994576	199.8036323741295
332.09191683640194	182.75205572742345	180.2940657153246	197.36233357544265
317.6767620087737	183.8566307254106	179.3952445484548	195.15318357946836
313.2365078013746	183.20345465761233	176.48156246608403	190.5624404664804
293.46579937129684	170.69310080436094	175.56887985451243	186.68736283603525
278.0952672233381	166.1836807850443	172.0850386058613	184.2979010264791
275.65204036196957	162.2725528014744	171.3599864927827	180.89714532198752
276.13736845202686	162.33318293935588	170.38933031266816	180.7758850462246
293.4788701723274	163.98485647285486	168.88366347168719	177.47253797922664
293.27620306312633	164.1369341418216	169.28899769008936	177.16838264129314
288.7697299849035	165.5848828284701	167.3906059009758	168.81681629521654
271.73072471830517	155.24021783193166	164.40646428358582	163.03318046644574
275.6551641684615	155.45376905225157	156.55758538327316	157.4495595249527
280.4304420072624	155.58635917801863	151.9520191259613	152.2393898531286
302.19497071252636	155.26223679052677	146.74628455563087	148.09721927308766
303.477299210698	155.74315021173334	148.8248201593149	147.13539243067453
313.58572900885	156.389695275943	147.25104762561807	145.84230230225518
315.85935627236313	175.0873124135688	147.31942307559308	140.75647786601195
304.52571083991467	174.0693403328031	142.76870977910605	138.2560880006461
287.5728462697974	173.08329075841948	145.69632586797576	140.22818714941334
284.33325902560733	173.14423764829178	152.17550035635585	140.10629336966872
302.2713139184385	190.3546487138368	153.11444446528827	137.89864339634903
303.32928727374974	195.35489451160967	150.99849775466578	132.47946872846427
309.4260021516004	195.2815561019956	156.65241917334154	132.62614554769243
310.3521278675608	195.29257580378967	159.35180580122517	132.60410614410426
322.3250125944353	192.07423872590246	158.37055902125002	129.85497123036913
319.5767333393251	192.44953316596968	159.3336897266801	129.1043823502347
320.42869101279126	198.8582914331962	157.62977437974772	125.35904795278546
318.1297540810641	201.33992626895673	157.77838135420848	124.84504517025786
310.08961691970455	204.34578715565357	156.08584844810542	123.27652520406983
313.19573605215174	206.81009920120854	154.26542596403831	122.73971689378715
314.2054481915099	204.83840915602264	152.24600168532197	122.32787981743729
314.16640190890246	192.67431823122993	152.32409425053686	120.7506046899332
315.5634486548513	188.50126175174077	149.53000075863918	120.51032418111318
315.6643771149975	185.236500575242	149.32814383834682	118.54692618759259
316.52778228521174	184.6530054528988	147.60133349791826	119.71391643227895
302.91947401480843	187.38787040574175	145.39024369864018	118.44814457517661
320.8253629650435	196.98107160209173	142.77459325686883	120.00932184416328
328.34919475550817	198.27238059757403	140.13026558150995	117.42670385319872
327.7876855271393	197.81128610834133	137.2012102761659	118.34889283166413
322.5418395974243	195.20424945459376	135.62788488641576	119.54129372276589
307.3220221720371	195.93240277948317	133.93619639310253	118.08498707298708
305.6344286957466	191.77550390787178	133.3445088612337	118.4650358473103
306.7273901172921	188.4242276218904	131.15858601814278	117.24004143158399
302.19446521821624	189.3452673342936	128.49367419822383	115.39796200677763
291.52269684653226	187.880170525984	126.8006386038486	114.48872690043959
305.6892415753143	184.59448308687774	125.05771883494184	113.46291043903577
305.3339299055731	183.17035871539133	125.7683421744243	112.55603848968317
319.1429660448496	183.07901280855248	124.4121538650225	112.73873030336091
319.6751074093415	192.86779709662156	123.34787113603872	111.82880324504089
317.7355071471656	193.83825516994165	123.5246128003978	109.88788709840072
306.78971563029774	198.91993180810405	123.37088331282207	110.7471900827316
305.1674095101379	202.03505143597985	122.92993690870168	108.20250947142021
305.3390472646982	204.34449515509584	122.586661399581	107.22165534475582
305.5786327759548	210.7011271373337	122.10749037706778	105.3594087483761
318.92706429222966	212.64842100795153	120.46872075665351	105.04454863744556
330.7390566265752	215.4215282871915	121.689925615535	103.04764686861878
330.56619631802516	218.4391336517928	122.035646232635	100.54856510120982
343.5196960079071	222.44605567373034	120.63689023542074	99.53707630949172
343.11092400677614	222.8845277980352	121.45443423768268	98.660132060882
336.469377171063	217.29281002585657	120.89064249844128	95.99668219457158
337.0217743411712	205.3011294080485	119.78584815822484	96.11060901954222
337.4483601857877	194.52646129569752	118.9326764689919	93.8961375484029
349.22913462176007	192.9615562476402	118.79195272094523	93.68011548396065
348.1693853051332	191.28389971174622	120.91145135419904	93.695259244944
349.30713141536603	191.748139280259	118.63595913373337	92.76678010791841
361.4515151805241	190.3667513913317	117.60776933822598	92.20661620937176
375.88500214395765	187.0440642016407	115.12563123307783	92.25578163332406
398.64033877934264	182.84580845732077	115.26728554175676	90.86965149779626
409.06008218270654	179.41940084874955	113.87116897062555	91.24134330307317
408.9018236470814	172.7833993190693	110.96248629106245	91.61254735917973
384.8135478810715	172.95736546367576	111.3412747167994	91.26461506996681
