# Supplementary material
Source: ML conference proceedings conference paper supplement (https://proceedings.neurips.cc/paper_files/paper/2022/hash/1c8c87c36dc1e49e63555f95fa56b153-Abstract.html)
Supplement: Supplementary file 1 [file 1c8c87c36dc1e49e63555f95fa56b153-Supplemental-Conference.zip › GOT-10k-Results/VLT_SCAR/GOT-10k_Test_000064/GOT-10k_Test_000064_time.txt]

0.009939
0.018250
0.018031
0.018183
0.018215
0.018133
0.018295
0.018349
0.018375
0.018266
0.018002
0.018213
0.018216
0.018201
0.018212
0.018184
0.018178
0.018196
0.018212
0.018183
0.018361
0.018282
0.018295
0.018185
0.018190
0.018360
0.018584
0.018440
0.018307
0.018255
0.018218
0.018184
0.018322
0.018340
0.018210
0.018205
0.018137
0.018102
0.018203
0.018211
0.018261
0.018416
0.018636
0.018365
0.018297
0.018254
0.018287
0.018201
0.018267
0.018269
0.018373
0.018691
0.018556
0.018372
0.018204
0.018370
0.018340
0.018366
0.018677
0.018539
0.018575
0.019086
0.019370
0.019110
0.018973
0.018647
0.018672
0.018470
0.018403
0.018522
0.018579
0.018435
0.018526
0.018441
0.018554
0.018475
0.018605
0.019034
0.018610
0.018523
0.018728
0.018568
0.018672
0.018874
0.018931
0.018828
0.018838
0.018511
0.018788
0.018832
0.018837
0.019205
0.019209
0.019022
0.018943
0.018875
0.018965
0.018975
0.019055
0.019162
0.019042
0.019626
0.019650
0.019481
0.019431
0.019547
0.019756
0.019403
0.020036
0.019961
0.019851
0.019863
0.020149
0.020173
0.019955
0.020432
0.020058
0.020337
0.020299
0.020380
0.020632
0.020778
0.020962
0.020899
0.020924
0.021533
0.021425
0.021427
0.021246
0.021392
0.021741
0.022228
0.022211
0.021936
0.021922
0.022060
0.022006
0.022792
0.022403
0.022302
0.022144
0.022139
0.022171
0.022205
0.021933
0.021862
0.021885
0.022349
0.022260
0.021708
0.021635
0.021539
0.021601
0.022116
0.021780
0.021664
0.021019
0.020864
0.020811
0.020608
0.020708
0.020538
0.020569
0.020437
0.020325
0.020334
0.020251
0.020120
0.020078
0.020159
0.020083
0.020088
0.019704
0.019950
0.019646
0.019689
0.019927
0.019891
0.019702
0.019595
0.019484
0.020011
0.019613
0.019447
0.019278
0.019113
0.019093
0.019248
0.019102
0.018934
0.018843
0.018762
0.018723
0.018851
0.018978
0.018847
0.018667
0.018681
0.018604
0.018621
0.018647
0.019021
0.018938
0.018634
0.018836
0.018660
0.018643
0.018341
0.018533
0.018696
0.018550
0.018553
0.018262
0.018444
0.018396
0.018382
0.018378
0.018251
0.018412
0.018525
0.018694
0.018438
0.018227
0.018348
0.018286
0.018176
0.018304
0.018570
0.018568
0.018457
0.018297
0.019208
0.018395
0.018535
0.018365
0.018332
0.018294
0.018106
0.018230
0.018256
0.018251
0.018063
0.018032
0.018205
0.018157
0.018563
0.018344
0.018330
0.019205
0.019269
