# Supplementary material
Source: ML conference proceedings conference paper supplement (https://proceedings.neurips.cc/paper_files/paper/2022/hash/1c8c87c36dc1e49e63555f95fa56b153-Abstract.html)
Supplement: Supplementary file 1 [file 1c8c87c36dc1e49e63555f95fa56b153-Supplemental-Conference.zip › GOT-10k-Results/VLT_SCAR/GOT-10k_Test_000065/GOT-10k_Test_000065_001.txt]

447.5	1.5	195.0	300.0
444.3473979082542	24.35713915630413	192.55389654119415	307.5448751834746
436.39671704430725	54.848173027629	192.80855908283394	316.972953778969
437.50275282555447	86.12609271463623	190.59648752033945	318.163526463449
433.42080518573493	140.84467638017972	198.7603827999785	312.0601635872749
431.92065402075485	162.47638398398726	201.76068512993865	308.77073245834924
429.0218069421299	169.91134022732717	207.55837928718856	301.89640962936096
425.0512865408181	172.53473415478157	215.4994200898121	296.64962177445216
424.3094308093549	199.20178443450433	216.98313155273848	291.55544817270885
425.9661367209009	202.338144728385	213.66971972964657	293.26965393304687
411.20826239453925	204.26915025584208	219.30950280073122	289.4076428781327
397.18666565127415	207.21327407665567	223.37592516459824	283.51939523650555
364.7056958740998	206.7527829235862	224.58951495204488	284.44037754264446
357.4055500324936	203.81918886569068	223.1850984181046	282.30521154985917
334.18398312404577	203.1983295274568	221.94710497844505	283.54693022632694
333.52965801178095	198.55970810757057	223.25575520297463	284.87842757859397
347.7658030340689	200.9670439665144	218.74563119298483	280.0637558607063
346.9558559712818	201.45731924574238	220.36552531855898	279.08320530225035
348.2570251538996	199.32755509730748	217.76318695332338	283.34273359912015
349.2226195605215	196.34763861292177	215.83199814007952	281.4280473024451
349.0415957958984	196.20081796873254	216.19404566932582	281.7216885908236
348.64900314282295	196.14457056759585	216.97923097547664	281.83418339309696
346.4352295646769	196.4054839131879	221.40677813176882	281.31235670191285
343.65976937181574	197.06944618395335	219.05492647692068	279.98443216038197
327.1963274093573	194.60760234936237	220.60489053282907	277.06388986231184
325.8117477496442	189.09758639709005	223.37404985225535	280.25923676278757
333.8669065279731	186.95704505254915	223.10088190797137	284.5403194518694
344.86623570799657	186.33476752851377	225.04131894886763	285.78487449994014
346.3061897613865	184.67055613189572	222.16141084208775	281.0830217177284
350.04790031877667	182.85952865627902	222.58950703474437	284.7050766689618
351.1368445005638	181.42853481981146	220.41161867117006	287.5670643418969
347.48780907739877	183.01499200888557	219.72752080195647	284.3941499637487
343.89845062369625	182.18952335533044	218.98365965490007	286.04508727085897
343.4310588867669	183.88414575416436	219.91844312875872	282.6558424731911
343.1031970579636	205.5154180079963	220.5741667863653	286.78804207862174
346.61435050305	205.05558816153686	213.55185989619258	287.7077017715406
347.4961773684887	213.69836380570692	211.78820616531522	286.1666028620637
347.36043140885704	213.08734297164284	212.05969808457843	287.38864453019187
344.20409049026466	219.59942464839827	210.52944861046637	290.05034379927474
341.445577810588	219.60987076809369	208.18823409837677	290.0294515598839
321.16790985850645	205.47093594087647	194.00749932949168	294.8490052115834
326.8539546870865	148.24246870576778	182.63540967233155	294.44388866355024
314.4681840918113	69.02870175109868	192.48435111311366	281.26152545055305
327.50978999697395	47.64904803279569	188.6843717103166	264.5988798004173
331.8929313577685	75.20788935724707	179.91808898872753	252.1606819557253
335.0422856494736	79.08319897338825	173.61938040531717	244.41006272344293
320.96059537473064	101.87691950405979	168.98526075643372	244.73912193981707
326.46331713646117	66.67190918069502	151.4918346094223	256.75729897459377
346.9609301203495	73.17341796514286	187.00220809391666	237.37881478467554
338.18929409014225	107.65272680059309	211.21686381136408	221.79126637003912
334.76367824010686	168.8830348744966	218.06809551143482	208.4269272777745
335.93971204032994	171.27911645912505	215.71602791098877	210.35079212255863
341.03533165592677	146.38974269261183	198.81520797506835	206.4528940177718
348.98301892944266	153.13085371073615	182.9198334280366	192.9706719815232
369.69679749990826	206.8237803532074	194.76333447717155	180.28892214558738
351.72561693329476	230.46035448606736	195.2742855019502	180.25765402446535
299.197141690626	222.8982282174854	158.42627645739415	195.38190656162925
284.15817529221283	211.7892393878718	149.55495842107194	189.77899076860757
266.57403214234535	224.481394734016	142.04766496062962	164.39468007631916
273.63116359889096	249.50561109505088	132.75605673961672	148.1048301987977
272.0273772876671	271.43051343017646	118.27821091020205	139.6258624322715
273.9433681052016	261.3166187048739	110.38822768613149	147.67964711587197
286.9523442085808	211.01994268659416	116.79779121102561	146.9370124910172
318.4761354804149	197.73307299667653	120.09450310282209	132.04556784868703
345.0156633378084	204.8971203220228	122.58977092097062	129.62625681219498
344.51343475889234	209.0829722463762	115.6511890871502	121.25455296348822
335.37414105946	181.11436059125714	104.0854709841224	147.34747077183377
340.351429706563	178.7600732148353	98.07578733705006	148.11115187754376
361.3576383838793	175.32632046153043	98.48915453970707	127.98043084769645
372.6958140400823	189.05202458320508	100.72497917265704	125.44119854970322
373.73803512149016	216.12857547818948	102.19688805111144	124.63336237878335
371.60673194658875	230.59859133140614	110.02725303158547	120.66764108704892
359.6354138486496	264.79018601660187	119.44179222846867	117.66088821213572
347.4206232726564	285.01156496194915	125.20200264311312	114.55687179612502
328.73002306868693	330.5058144900387	105.96120598304492	125.48796746235894
338.9979295802158	350.96079821558783	92.70864190576975	131.91911815884725
372.0937828202192	369.8158780590286	111.09163670980585	129.4484173403169
371.209789336118	381.19875510041186	120.43017102823336	133.17957898333867
379.75390411947853	398.5280153658954	131.29008859873485	130.46179803776883
374.3183589262332	397.042381394806	138.039107189874	133.43306597994763
375.8088532057058	381.97750634990126	139.33311712248766	133.63782662884503
389.0369227567927	369.0702459210275	142.9666257330033	129.3626997739032
406.7284699627495	342.75962136634337	137.5947212762609	130.53619467440666
416.8373362427077	328.3629996553687	138.48783029472938	129.77425988661705
414.632947605519	294.9388795943556	138.67256490680344	129.0378174117908
411.2701541110922	282.01285215622636	141.1829229954996	125.38326998694701
420.3775360788364	268.49388766044996	143.94840390681802	123.04885619297025
416.8809000027903	269.7862476026837	142.53875670714768	120.46413630850272
417.4124178217996	255.19274772106962	141.47572106912924	120.6842329803112
415.4957161534204	255.7386691078857	141.18386841398964	119.59239020667904
415.09779739126617	253.66974454318296	141.9797059382981	119.6270472221852
