# Supplementary material
Source: ML conference proceedings conference paper supplement (https://proceedings.neurips.cc/paper_files/paper/2022/hash/1c8c87c36dc1e49e63555f95fa56b153-Abstract.html)
Supplement: Supplementary file 1 [file 1c8c87c36dc1e49e63555f95fa56b153-Supplemental-Conference.zip › GOT-10k-Results/VLT_SCAR/GOT-10k_Test_000066/GOT-10k_Test_000066_001.txt]

590.5	461.5	108.0	48.0
585.2300820161181	460.92582216682496	112.7181600664702	45.737517715703184
584.1225256497974	459.71277780901204	112.49427941059983	45.72461304281736
587.0380484589174	449.3861649541837	106.66323379235982	46.89353987138813
575.2252177538048	438.7916684327635	113.68504458731884	46.73472498031499
554.6213327473231	429.5205960627848	122.77396473483142	50.45278516698736
554.6423873794909	428.8520390964569	122.73185547049584	51.78989909964315
548.4339483001186	429.15203140463296	124.38469846823568	53.88092327354229
567.2619954180547	430.7266906833931	111.49566129464196	53.48349994516414
591.5785027727899	431.3712677267999	96.11178844048939	52.19434585835056
597.5481080794177	431.80936419067774	84.17257782723375	51.31815293059478
627.2561541682078	430.2041003320642	71.35186451997549	54.528680647822
543.0945424861017	452.0101051565649	83.41782667481931	50.475471304989675
535.3982111179964	441.64344300601385	98.81048941102972	54.46847223765538
533.5581914310607	436.77309766960343	109.65590004318607	61.82070582438146
523.4061998147765	436.1902349186765	127.28586127171914	65.66045333027043
504.8285232409788	438.4546650697821	143.444510887874	70.13018025581945
503.0290470768942	437.7987963712971	147.04346321604328	71.4419176527895
499.9743452036422	437.957825201713	153.15286696254725	74.51268720051618
487.20944288709745	442.0636110699917	164.55704232538463	76.89533741664803
483.2178799607466	437.3967466652848	168.8009438251572	78.75061752020336
474.7248686849164	421.0822003621206	170.45326601622082	84.54573449548751
474.56239718668274	419.7433785521675	170.77820901268808	87.22337811539373
464.9249247859617	414.36285897020207	178.02496448135145	89.96562439080532
435.12387348025175	396.1745853859228	195.99731818300978	97.20134732253098
420.55900767064713	393.5736541039017	197.8192608311142	102.40320988657325
419.4873440862384	392.5185159377294	199.9625879999316	104.51348621891783
395.7126049656574	384.8435510613096	209.62701862649746	105.65652311628374
379.89938047115356	360.3232793883665	206.9735042535616	115.51996547709155
346.91190759833455	343.3683028610508	217.6478675201659	124.29329013216221
344.9053346034011	341.72470627076626	221.66101351003266	127.58048331273122
315.0113401398612	331.65943235035274	221.50177281883253	131.36178671220918
269.9291482358916	322.8589675954409	234.50666476408276	137.93993167022015
242.52066061617558	309.4722036856885	242.79719628307498	147.26604309456002
240.51126974305592	307.3888297276694	246.8159780293143	151.43279101059824
211.7124053936496	282.9441137926416	254.6016947866993	162.96321392458316
185.06854385215402	275.6400687076044	262.13659862769265	171.03518706008634
183.95078733948034	273.3743609159258	264.37211165304	175.56660264344362
156.02981649983053	257.1759337044569	271.96451874514617	180.39229444512807
126.7601531258016	252.41179064959624	280.89383288298893	189.92058055484938
112.26247104897908	246.11179518789302	287.75004883184215	202.52057147825582
153.40411040944397	249.80475713126464	259.3077997097453	218.20937456244098
158.71664934918314	246.78835972479908	248.68272183026698	224.24216937537213
114.26848702823514	282.66467621454234	270.5727028212651	204.60558145769502
84.10873314162113	244.35316219787975	226.38118369039378	221.50802268867773
141.0295371566543	241.02218419069598	253.6049547655602	228.16997870304527
134.51365588263343	238.04053126855467	266.63671731360193	234.1332845473279
164.77573923515894	235.54272269743487	261.2864646484944	239.1289016895675
193.59241018214627	236.08733619335246	258.8035006522801	238.03967469773232
217.844605868593	238.19864768930393	265.0572645846807	233.81705170582939
216.9024815762569	239.23824719550717	266.9415131693529	231.7378526934229
252.79858265027013	234.9028257720506	265.7842341252773	232.56037075100818
312.03629319095364	229.16210305623326	264.9625898102813	228.35464594712664
366.03191696083286	207.599447406154	257.89587900742373	224.89940183025396
368.556057850746	209.2097720888342	252.84759722759748	221.67875246489356
407.5179146093988	184.19699331740915	242.14330600159872	219.42253711450502
446.0696923639962	176.14581791433457	230.43871353673336	220.99178502191438
449.3307254077339	176.06506903002276	223.91664744925782	221.15328279053801
488.7768447462828	154.12538822699466	208.10488231837644	222.9789953657833
528.2491999261343	140.80828529575263	190.249581217585	229.25006480863013
573.542885670562	133.8239179889072	165.65373275022026	236.61964712017192
599.8594610480197	117.56254776279886	157.1928327829389	243.90110140802625
601.5238880368557	117.96370965973145	153.86397880526698	243.09877761416107
626.5117656667376	109.68844150186348	147.3706093859004	253.437544524126
640.5914461833747	106.78005797205998	144.23701616761397	259.254311583733
653.2687576151569	101.79884104209071	144.03968563831634	262.92742236010486
652.8014762446481	101.24277374677882	144.9742483793338	264.03955695072864
652.403178207964	100.57514295891386	145.77084445270233	265.37481852645857
663.1053897753212	125.04002220113253	149.98993325424914	254.88032794641333
663.2063080169718	132.24660704267777	149.78809677094793	246.78934922064474
662.6195579973642	133.99485799113293	150.96159681016314	243.2928473237344
665.8334769322906	151.75561130627472	144.53375894031024	238.60143592402403
655.7585718026629	155.45201294289126	140.7316140172522	237.19662144636936
646.7296139783582	179.07474983590302	129.27474221836326	231.27185008684336
647.9115208603286	182.28052992140695	126.9109284544227	224.8602899158355
651.284407357417	202.63442542006234	120.1651554602459	217.06701853112855
655.1033556074689	219.18736601523312	112.52725896014198	220.7506565941161
656.4991546998027	219.3500048466478	109.73566077547426	220.42537893128673
679.9561837110458	218.8292217041	103.82812376338958	221.46694521638236
705.2769174418829	211.78730525266388	98.5314985527678	215.39751489656464
740.150849443884	193.13168972060504	87.07205245456052	223.5645370077849
752.542849387329	175.91666941628156	95.69481882557899	219.81541617882198
750.1665146520609	175.55585155929697	100.44748829611544	220.53705189279117
745.1246959636683	165.50890669869347	110.53112567290063	205.8714319316506
738.3675483256346	154.98069140505152	124.04542094896783	182.59529677076625
735.9907729294622	151.19788836328235	128.79897174131276	170.9331811416902
728.8362280393815	135.33198560292627	138.39954387767236	164.9968455119889
725.7841026053618	130.0135080359651	144.50379474571167	175.63380064591126
725.477892138615	118.81395703689773	150.15179029976917	187.96175340291876
726.3134963814349	114.18007804157818	148.48058181412915	197.22951139355786
727.2415387090375	111.93044696258417	146.6244971589241	201.72877355154588
713.0619043582267	111.50824149176773	142.17161052277416	202.57318449317876
702.6095324335208	110.49768028083516	141.44363609139043	204.59430691504392
687.2280582447074	126.44623191900138	134.21980730568066	205.25729835014283
688.7552198869548	127.2211819740771	131.1654840211858	203.7073982399914
673.5484353751303	163.80629356035396	124.88110812851622	209.17562845954927
657.0846352488659	199.4946840552485	121.27783005275217	210.86060412634617
658.0229394586715	197.89749896822627	119.40122163314061	214.05497430039065
644.5290920315672	235.07869723659917	115.2001985364724	217.66437264083717
651.2102247933954	283.4172556063736	132.9149383489229	203.85927013090648
680.352756182146	321.14360212322913	143.19225847253418	202.24298945223944
690.5292820462668	345.4455607063654	122.83920674429262	196.9992140215036
695.5382016022365	351.8680119154785	112.82136763235292	189.15717367031772
659.8408093108142	370.5637316144248	108.73728434246298	189.50516820879255
628.3942350369844	369.54505863743816	106.48177871883775	196.19598946071477
628.3278207399607	369.29686699381364	106.61460731288497	201.40631578554883
628.980351916248	357.26113745637616	105.30954496031038	206.30595578445684
648.736178653376	356.0395716082538	99.6951531415311	208.74908748070146
650.1077671020689	369.8935439916801	96.95197624414537	214.50735225868112
650.2998365430046	383.58802339521156	96.56783736227379	211.20208419063943
650.3571546331899	382.7725462729036	96.45320118190327	212.83303843525542
650.4953117141049	398.619484478399	96.17688702007342	214.62483821204262
650.0539866088784	410.468341549086	97.05953723052632	214.95129106302795
649.912456377157	410.5574977298051	97.34259769396914	214.77297870158975
649.4845143571209	410.01448920355404	98.19848173404125	215.8589957540919
650.2285011096985	422.44018583393324	96.71050822888611	210.4405559534717
651.8035621647895	407.57827250609984	98.31379176324208	211.64394874191052
650.610760613833	407.5919729669258	100.69939486515494	211.61654782025852
652.970564979968	395.3319033661117	100.81998388235426	211.9356982745402
654.157587152077	376.79305073416054	98.44593953813632	215.08473613051726
