# Supplementary material
Source: ML conference proceedings conference paper supplement (https://proceedings.neurips.cc/paper_files/paper/2022/hash/1c8c87c36dc1e49e63555f95fa56b153-Abstract.html)
Supplement: Supplementary file 1 [file 1c8c87c36dc1e49e63555f95fa56b153-Supplemental-Conference.zip › GOT-10k-Results/VLT_SCAR/GOT-10k_Test_000066/GOT-10k_Test_000066_time.txt]

0.019184
0.018624
0.018412
0.018357
0.018336
0.018115
0.018475
0.018449
0.018443
0.018464
0.018334
0.018284
0.018313
0.018235
0.018360
0.018670
0.018784
0.018278
0.018267
0.018336
0.018561
0.019132
0.019099
0.018813
0.018716
0.018963
0.018890
0.018940
0.018966
0.018934
0.019077
0.019018
0.018793
0.019528
0.019252
0.019315
0.019607
0.019800
0.020152
0.020229
0.020650
0.021008
0.020598
0.020700
0.020455
0.019917
0.021256
0.021244
0.020955
0.020656
0.020479
0.020704
0.020288
0.020331
0.019792
0.019725
0.019577
0.020000
0.019502
0.019333
0.019339
0.019385
0.019381
0.020029
0.019691
0.019673
0.019605
0.019399
0.019537
0.019164
0.019351
0.019332
0.019267
0.019493
0.019060
0.019749
0.019335
0.019156
0.018919
0.018573
0.018834
0.018696
0.018910
0.018914
0.019385
0.019454
0.019408
0.019391
0.019327
0.019391
0.019398
0.019281
0.019295
0.019289
0.019250
0.019192
0.019178
0.018675
0.018857
0.018520
0.018894
0.019250
0.018935
0.019136
0.019370
0.019298
0.019281
0.018913
0.019066
0.019005
0.019136
0.019125
0.019130
0.019243
0.019028
0.019065
0.019050
0.019050
0.019141
0.018987
