# Supplementary material
Source: ML conference proceedings conference paper supplement (https://proceedings.neurips.cc/paper_files/paper/2022/hash/1c8c87c36dc1e49e63555f95fa56b153-Abstract.html)
Supplement: Supplementary file 1 [file 1c8c87c36dc1e49e63555f95fa56b153-Supplemental-Conference.zip › GOT-10k-Results/VLT_SCAR/GOT-10k_Test_000067/GOT-10k_Test_000067_001.txt]

512.5	287.5	286.0	188.0
504.6429329777317	290.03229095772576	278.4404097884185	181.93541808454842
482.391351120879	312.8174107516267	279.68308724067606	179.6256647581945
486.44684242993685	312.84340978878566	271.5721046225604	179.57366668387658
456.69960959356877	312.86249085526526	274.52552031528904	179.53550455091744
432.04860777124657	312.51214899236265	274.04813268826524	180.23618827672254
409.1295759655171	287.7510406642157	270.0752706903336	187.0633258392532
387.9069104046139	286.4126026512207	269.5048134957919	189.7402018652432
358.5928148827795	272.9818316476395	270.49395138792664	194.9870989405803
353.08233270008117	248.5165390484803	274.20865583838406	200.08012464926355
327.4246562221083	244.33284829678996	280.84637119459455	201.00123321935507
324.58700284241354	225.28937700976127	278.95961650514363	201.27786854920998
313.3801861651075	209.67374327655733	271.22117346655625	202.35705962241843
314.9689722503303	199.1102304618627	268.04360129611064	201.16952478992238
311.20847223881924	178.3482774502143	275.5646013191328	198.4710482414828
311.4262879512529	180.0793799979452	282.56937637518814	195.00884314602098
320.2439595446774	175.5589236648128	287.4017790085893	196.56050720553577
327.7257331468583	180.0420033423856	287.61385927819856	187.59434785039014
352.0574550033308	180.67264563255492	291.04468323927296	178.89102503090592
354.12201296445164	177.58421496906374	294.263251159228	185.06788635788826
380.35611406866326	205.10169545624387	294.2908094556712	182.5286858883945
387.73094112972217	201.02119930017062	286.998378507278	190.68967820054107
415.24482395567793	205.7477670614528	291.84522181763526	188.7208687982603
439.6366262346992	226.23246785499072	295.73159160668047	185.37287745910422
460.6108544946239	235.81377335192136	298.9418420112171	188.78961992743592
467.2899816362806	234.987060109536	293.2152696868531	190.44304641220663
500.59002669602796	260.53978642247785	287.2036292202093	192.3524872325675
515.6124933035416	260.38170707320205	287.2188714389954	192.668645931119
519.6939569094104	280.2063403180301	294.09699102472496	198.1425198338645
530.9278843680017	279.9759373234033	279.34403101454575	198.60332582311815
558.9051287614884	285.3585122465896	275.88836729183583	195.33800812878297
561.4136830807423	295.29932403210046	270.87125865332814	197.63758537270365
591.4527549072907	295.43865250537414	269.63730235378046	197.35892842615635
596.5570362068029	294.10750141869863	266.76095690425626	200.02123059950736
622.1665097803128	291.09753161212893	266.86665662044294	206.04117021264682
634.8075462910713	283.48595470005944	271.31238772772997	198.96847094018284
648.7218127013907	281.324076694027	273.02008799435373	195.90816868043214
667.0629159330061	290.0817914507919	273.13634651444175	193.11212516022994
692.0098254000252	281.4357546434453	267.1349782754522	210.40419877492315
725.9727439340945	280.9560525602923	259.2653293731606	211.3636029412292
729.3237248688926	278.9005771729992	252.5633675035645	208.07267823050728
750.2515105132723	280.53212956713145	246.9360315410462	204.80957344224274
762.3927259978216	280.85534448529245	251.0790675022399	204.16314360592077
799.0113614702099	270.6979478765313	235.11895337539272	217.31829222120172
816.4477006976297	264.4464561247725	228.7407438100397	222.69765850234774
819.6446950298923	251.51042703945757	229.45586208075366	227.24239586726006
846.7781491800538	249.9503304813597	232.72557323910468	230.36258898345574
878.3280383394181	240.26070442955964	220.67471752212575	249.7418410870559
906.8342532601645	238.8496413827711	208.08987796369985	259.96856556114415
912.0249648307042	230.45502019937598	205.06812606969888	269.3981366808559
912.7695239873201	233.52607846011705	203.57900775646704	270.7107405151221
941.198318096389	253.58325688713927	206.32463411126196	267.8483927691608
948.6703244872318	241.73155598716855	198.83218258003922	276.64867206817627
984.2324831648981	241.45840845684253	179.94729595072914	277.1949671288283
993.5206537530917	263.3430592051042	161.37095477434184	290.6916783183909
1002.9144921188359	286.75524992671893	149.62917439670105	272.0508822905522
1007.594048908679	291.17367949783505	146.8403558732611	256.64372809207373
1006.0548770194325	322.9387642012206	149.9186996517542	237.17844000806258
905.1135001870462	463.27167990682085	164.02907788742715	192.7423712334716
849.4112561301206	477.7355944416032	163.15562172813333	163.81454216390696
827.0931020159952	472.82981613233085	176.89712700450565	137.58216200526
979.6808066421149	424.75566000982434	138.62995191857237	159.5892980929658
1024.777665840747	409.48079998538424	123.53168193864691	161.97822498534399
992.5035351170184	413.80757234137	116.30368534103039	153.32468027337242
964.0310761780128	416.73100651914797	109.7071327830454	147.47781191781658
917.1841442225508	415.2317801804648	110.49888124608614	142.3978197736278
827.9716952904373	347.48297465839755	102.11302249180656	154.67982538853462
873.7025611573367	273.57227308211964	99.15165044263453	153.659714526036
834.8705054171305	244.54917437748597	117.4445743588318	116.71201183255886
808.3280858154307	249.2542085186559	118.90440260209299	99.92694198448496
766.7995425295201	144.71729022892652	105.55968167548478	109.3113201743402
752.8985645821232	230.0818474503854	109.67597306098759	97.61452457951927
738.7946960218139	229.3578266083142	111.779426361461	89.27345983110727
720.7340056136925	220.69954479046362	116.28856734351146	84.46145558287375
706.7736611614557	220.01448053572585	109.54309558005707	88.98305324397913
693.3707035586762	219.29607365521366	108.24919495541829	87.29766524609263
681.4014286366679	209.17138514512723	101.43718469475888	89.09670620345986
668.6752705014123	244.23822985372482	81.90510182911697	114.92973494339104
665.2097168687754	193.3228061838043	95.01387874608214	99.38485890109692
659.3386283153129	231.10327393321	79.20522009608212	118.72124656502798
654.6955319479601	228.87190078019455	76.08588051497773	126.28537595001134
654.82285316294	234.5232381884318	72.66889658361029	121.30738413635238
652.1325900977746	228.62093890801796	71.98813882622328	124.02005686560341
649.3419294311046	229.23899634182388	74.51002726789658	125.84337488965838
645.9136177152266	224.21199002119727	78.2374765160801	126.50986498019378
642.0765347867952	199.36190835074294	92.31541381253538	102.56665676578989
645.620431985272	233.94385510432693	82.15967210751538	116.23734057640672
643.574490297946	231.87696037898803	80.02591801562657	120.37113002708452
638.8975974462073	225.26435164150476	76.82038759811515	127.31668944155668
566.7034420682013	289.77038206251865	90.41567368620235	119.52743195028839
558.7876796561496	288.5577813597966	93.05425992303	121.9526333557325
