# Supplementary material
Source: ML conference proceedings conference paper supplement (https://proceedings.neurips.cc/paper_files/paper/2022/hash/1c8c87c36dc1e49e63555f95fa56b153-Abstract.html)
Supplement: Supplementary file 1 [file 1c8c87c36dc1e49e63555f95fa56b153-Supplemental-Conference.zip › GOT-10k-Results/VLT_SCAR/GOT-10k_Test_000068/GOT-10k_Test_000068_001.txt]

1376.5	552.5	264.0	268.0
1409.3115058111662	562.2392569858478	256.02224324566043	264.27727313344525
1453.3138633058793	560.1275346962489	225.37157567231088	268.5007177126431
1463.3169055966293	557.9720773919673	205.36549109081085	280.5817310328363
1453.4423828076049	553.6472656167057	194.59549637911093	273.97183443848496
1449.3857079982909	536.9128222108757	202.70884599773888	263.32574586625117
1474.04888748396	522.7608686609806	204.64762045472253	240.3645195377195
1469.1410068155478	533.0601360412174	207.46096189290597	226.7684046758867
1473.6768188289934	529.8148537976247	198.3893378660144	233.2589691630724
1476.652365021877	531.7272771151373	192.43824548024776	236.22618640650325
1477.2652578087416	547.9105155654429	191.21245990651812	230.82695052490763
1495.9822659516783	557.745236439993	186.97327474139496	224.4354412241075
1537.7992803820644	572.1003356350232	181.00515260450624	221.61387840867528
1571.3462084079342	573.5106611467037	164.57041130832008	218.79322738531422
1598.0493912468737	593.0497566112014	165.3630065879813	221.86978386773885
1620.0535486835415	596.6938953092313	170.00989790849061	220.66340724590953
1640.177336270501	602.3417962732024	166.59868430985742	215.50699891384852
1640.623969111561	604.4035086743245	159.70034198685835	217.3886507524835
1638.3102846177553	620.1111845484318	158.40669985548718	233.34138795613077
1640.2860279465422	623.136822776619	160.59619361694087	233.43109191878386
1659.8132425617546	620.7043845852495	164.79192679193233	244.47456293086827
1633.4471197388152	604.6005195153838	166.20793495731573	257.43870401541386
1588.3837032900071	573.7302225501064	170.10818305334868	266.11678422191727
1556.6004403398285	570.7958633339541	179.0510101123156	265.1575402990479
1495.3180110946923	531.3096414367276	169.32882084737236	253.61779352414294
1469.4685598764272	509.57174107240667	161.38087752487002	250.7016031068706
1466.2474872102418	507.32200811967414	167.82302285724083	248.74980525229012
1473.4908003256376	451.12233864865357	153.3363966264491	269.74061208933625
1499.0308976208141	434.32580633626696	148.45118576053392	250.53940960046654
1495.8851797184413	423.15039803455386	160.97430674156647	241.73180032245682
1510.96330585928	421.43082888887204	181.29700054492577	245.17093861382048
1525.6926850948898	427.1138586960175	192.02127421936308	233.80487899952956
1540.8284354894786	459.8668573677664	201.93686158249125	215.1838178337215
1539.22351037308	490.8982014416175	205.1467118152882	199.09713948013354
1535.0841593217715	513.7631123675703	213.42541391790522	197.92838442766262
1534.1757228704726	528.9965097110264	215.24228682050324	199.84590580068573
1521.3446953351918	557.2127434379357	214.7615512462222	195.69901963655246
1509.1269479642403	555.0580892128662	219.81043683913316	200.0083280866915
1470.6852173341977	561.111725400709	243.81805622459802	201.12001617966098
1414.6213285944973	574.4022014945213	243.96458195126093	202.53437693022096
1373.029515541748	601.9766342412665	214.765677925703	231.6724090350225
1357.5821061261133	599.2136608183113	203.48493326320647	251.25687704552178
1365.9029114323066	615.0802882082914	165.38911535705648	262.43203685308856
1368.8762231734224	610.0368325827513	152.7486224456498	265.8250786749932
1312.225559809003	611.6243078116538	161.5491076640647	243.05622043398364
1335.9124996629582	639.7015212439024	171.22922711616502	237.61645948949604
1377.4435826273289	659.3896900709354	190.84321535486342	236.74367964822005
1398.606364061524	661.4152481277616	195.58527075867306	239.41650900202472
1405.1176844408558	655.881742674137	182.5626300000094	236.80007522328447
1417.9787280963778	669.5372244614834	176.61148521088612	242.44068251845977
1442.569772958145	672.1165318550566	173.48140595630883	237.2820677313133
1435.558795128842	674.9966748483082	174.6050027681904	231.52178174481003
1443.1120434168085	692.6354135140363	185.01841043330202	221.76420865439874
1437.1358269440238	694.4559114767095	190.57135536982815	218.12321272905228
1432.9107951286956	723.0758439611029	205.4538966142514	205.91069105663118
1431.4723667828519	726.4302776164683	208.3307533059388	199.20182374590036
1430.517511329857	735.7664520272126	216.6578975140992	193.3643415287528
1431.0823673510054	752.968972812401	228.4370607767096	191.23148822064434
1444.7326451224117	749.817409835382	234.14879187471635	197.5346141746826
1365.1182368399932	671.9334603659431	230.36845857474117	197.08541115978204
1260.8856754823817	553.2855619427794	230.31351893770864	198.9553311567887
1190.24070083649	470.9913742596955	229.73526826424992	201.4086208483945
1173.6711222399733	450.2907591856515	228.944410522829	188.52182710135543
1169.8705416390585	433.65997089979186	236.54557172465883	175.81746891407045
1167.1300867509735	429.2261966160918	229.07392705040962	178.20874025626102
1164.9991373116836	415.29265606574006	233.3358259289892	180.47028888689636
1165.9894339152052	396.8224636375624	231.3552327219462	184.89405748346667
1169.411777928	404.9590315625892	224.5105446963566	194.80048340124569
1171.6590874759536	394.9726847578222	213.41674750368725	208.17399891401726
1175.7371032223582	394.7894708131577	205.2607160108777	215.17952281477196
1288.2163609557729	429.7795984887453	185.5422103818653	244.50894964318547
1251.4163981770155	405.6147170700733	184.82036537433066	252.29956489959363
1285.1197096359324	439.3349284811094	172.31967887877698	260.3548046581563
1289.0970004429466	464.58256551803123	164.36509726474827	257.30846572402095
1318.8213194107077	467.84530438592043	151.11700725713655	257.3830662636584
1318.0974010856464	468.768121340016	146.1864208422181	261.91585542050876
1296.1336262290374	494.6457428380811	145.58083744481087	254.69374553500342
1288.574353511068	504.9044805117838	160.6993828807498	240.42098195821393
1250.8882275445517	512.6773709837407	185.7869237365246	237.44637878361448
1226.0302428320492	528.7979661825689	208.89222360409622	231.8158579433914
1195.1521868497307	551.3939105766163	215.14483844660884	235.1895291371552
1162.4111657824144	561.0476484536753	230.9960176069902	230.062299947109
1120.1484107042131	558.9834148033701	235.65319873872068	241.45152443178029
1090.1996539047623	558.1948854197414	242.9574619094635	243.02858319903794
1049.0253758754923	586.7085371853335	264.0794297717857	247.22786786407116
1007.2463154518407	638.0430103781177	283.22963009896864	249.22179232369768
964.8989376669854	632.2680518925359	267.3549667522171	260.77170929486124
917.9025499439003	619.6865314439142	253.229420369832	277.61795620529267
872.9615299987397	605.747461144064	251.17791242885224	288.7809062902111
823.8448924949753	579.3997443232738	264.42986726326455	290.48754782792173
761.9214188351939	570.3893693527122	248.4936479164121	291.035401935743
720.6384309763639	537.908513149789	237.67056153916974	296.56771119028804
920.9354319777224	592.886128505314	257.09704379647934	312.6186257572458
1023.4494903084754	562.317525691102	267.1387518934582	328.9496178943185
982.5071145785158	505.7662370397107	274.0267597141189	310.80789382839896
982.8629018918027	498.90083468748196	273.3151850875451	306.1278188668471
961.1073079377777	477.13591996750193	262.0978035201757	285.8076505854841
966.0443685183055	434.0135703439187	234.97085754788185	285.7882257764595
968.9023315755752	417.16300452215467	229.25493143334248	253.96005368194938
946.05244038246	426.5251421371357	229.31152579039747	227.62858044712482
946.8671708510524	437.73272840393014	227.6820648532125	212.40930289676146
