# Supplementary material
Source: ML conference proceedings conference paper supplement (https://proceedings.neurips.cc/paper_files/paper/2022/hash/1c8c87c36dc1e49e63555f95fa56b153-Abstract.html)
Supplement: Supplementary file 1 [file 1c8c87c36dc1e49e63555f95fa56b153-Supplemental-Conference.zip › GOT-10k-Results/VLT_SCAR/GOT-10k_Test_000069/GOT-10k_Test_000069_001.txt]

943.5	97.5	112.0	99.0
943.1684307761511	93.77397311675757	105.02062324289642	105.45205376648485
934.6299424377366	91.07685514635602	102.21042828522414	107.53176110153775
934.6475360371288	91.04502191032284	102.17524108643997	107.59542757360413
918.273895848035	89.84297011332674	101.8905275030508	109.99953116759634
906.2602310649761	87.58487389083837	102.56417444432753	111.17948323759578
896.4693905708707	86.98838320815447	101.9537061660815	112.37246460296356
885.8762913161994	87.2318078378413	102.89459580353059	108.51139719827431
867.5972330603017	88.44662625466795	102.83443325241959	112.73962928514945
853.7538025811253	99.02597776422209	106.76349654482314	108.55078174171915
834.8371543907524	113.250400118196	110.68932461268165	103.83716485279231
822.08438003898	117.65899877843343	109.17136090809062	101.77584563435138
809.4946771777131	131.86037453458772	104.45733119050581	99.94503673548175
793.216380621097	145.57745284425158	108.04527477426109	98.26079080902244
777.4220399888383	171.5170559335236	110.4019487679845	121.08560321139646
763.3598313770327	182.0315040383727	105.72584338056907	121.92372207571597
739.8178374680788	204.68837707320796	99.06838525015401	119.60313276470379
727.0582838739411	226.26989043006006	97.06870933252526	107.39873704514171
712.0794092254316	251.18863962702676	98.05606811468758	105.84522284263632
699.5637961454073	263.59132202227255	97.403628920186	103.51306523737618
684.4327549174687	285.7948983763495	99.19262099890518	106.5610631578189
669.9279343182078	288.9576456869519	102.28469410667536	103.47526454795818
659.8003782357259	300.21429887574504	109.57860327690344	110.12466490852692
651.2647671366907	311.5730386798186	109.35036889747693	115.08631582437476
648.0403922712486	334.8736825401724	112.26497123127524	128.56553385412622
644.8436300350656	343.86572544013086	111.0776278910096	129.5336175857883
639.1174608187629	354.83762529416884	111.17086917682077	130.30801217130104
637.5965628232375	356.728750273365	114.21266516787148	126.52576221290875
634.8715407814822	357.80773895323534	115.87279284276669	124.36778485316808
634.5770359803151	358.0858071492162	116.46180244510083	127.59437328829279
632.8965927369243	357.48674770382996	119.8226889318826	124.95008759255442
639.0039461642459	355.8284222754183	115.3169379930973	128.26673844937773
652.2238900947285	344.3414559413842	108.05008980787893	124.39841557140042
658.1958149771413	346.8614173100127	99.76458235400099	119.35849283414339
671.9776333037684	356.55567241571015	85.990171246124	124.1011273271585
677.6539428492624	356.50649954801065	77.93243938397877	127.49436029140034
676.5248396891675	353.52930691714005	80.19064570416867	133.44874555314152
688.8271195670183	337.03086236064297	75.61505990874858	149.75482303256777
685.4842250050689	330.66281326922143	71.79847428710256	151.98854646986607
697.7058985707617	318.2306989345987	71.62538265129076	156.04969900004824
684.1697356823763	333.2521316425788	91.65116720540264	126.00683358408807
695.6682686453662	331.8858855270478	92.57305655439029	121.90533859373079
714.528530005606	333.1879306864235	81.8101865631652	126.04066145729293
719.4630898762189	335.65285327534593	75.1957278222458	124.36547727975456
718.7718916835021	356.5044607967305	76.57812420767928	123.20609977787589
733.8656947937567	377.4421599793908	68.2635048862478	121.95196279655687
734.3840641748214	407.940833241955	70.19230534072078	126.19647903668707
747.2055978907873	424.19691134287393	65.9771964207724	121.23455520739893
737.8310154541214	456.93820759700156	64.31482314213585	114.07064313333896
737.216980630837	472.79587658118777	65.54289278870452	101.82767284255706
714.5999002329715	484.43597707405496	76.71411086810377	96.88905639638583
711.2061762714878	490.4984184786701	75.31369207041125	95.68132921470223
694.7116020998295	502.7353990455607	70.67006942451782	98.08791878749956
686.9623042697554	511.9363341227173	64.97808245641806	100.87663126143438
678.6259966920067	523.3977742834568	66.07142907860738	98.7261089843663
667.2193368444068	536.674968866812	68.22500368239207	92.83146490907079
658.8611192166757	555.8242753737194	62.18123912005798	94.99542934911592
655.3482496988447	565.0532617418461	59.36017596983244	88.84595934522204
640.9563533081425	562.1669817668917	55.63067005063486	85.32900538067305
641.5528424957902	568.6942966639217	54.43769167533944	83.31180572307777
640.7360918699017	554.7955914950945	58.22852928750767	74.43449793408195
634.0735434522678	533.4986647836024	50.70081776255131	85.74913881673035
672.0489725134207	463.97445989087856	55.7288396956697	88.41206640356934
687.1573579984106	427.36002870746364	54.830971892584586	91.72662121857331
696.0862614277661	352.4157592821338	59.869527930796615	101.94734639800187
687.1514147185097	351.83093888973735	67.63255430873954	103.11698718279479
682.6007372114082	340.68694503306057	76.73390932294274	93.3120119639578
684.1077229347533	298.9745285504901	84.41875817591162	93.82098760674208
713.3783219553363	230.08820250998974	87.60843016636109	102.52000234890977
702.8389418696779	214.37343512252522	99.7116538535619	107.02292767149063
697.6687688377906	187.30062989064382	113.3071535887166	105.83092572179338
702.6384376691831	173.52709826835854	127.52125464942345	105.77405899665891
701.4117139958125	172.21001575092168	137.3146003770575	108.40822403153268
701.0959722192547	171.55011349483908	141.80903502589703	105.86507744797419
700.9209371783691	173.1259354952249	142.15910510766815	102.71343344720255
700.4705641136451	171.75180854015227	139.21611934219163	109.30541925227226
700.6607410272953	184.4468659448587	134.92913332068002	115.16836199654912
701.7823547190717	197.12780539160943	132.68590593712725	117.35476276030796
701.2858151624816	210.14158444509675	129.74318759811368	122.81358427088281
700.3904523827632	212.6786502022044	127.55701545498405	121.71635045923396
698.9935234582971	228.13720021615376	126.42557788780582	122.2016137602212
696.9948120647738	230.28244718280018	126.50775309544605	121.82636740633461
695.3540232789111	243.19183951938348	125.87873083938848	123.38178152764982
692.1154694663644	257.3913504062351	124.50521214255795	122.45995188068086
691.0599702029511	271.53062978905547	122.72702883052769	121.40566598703776
692.0131035873748	273.0924614029338	120.82076206168045	122.12659804802146
681.8808943887072	275.6040496731097	118.12960728544272	120.92935036993177
684.7330311439224	287.50836610811155	116.18997722328552	119.70857818956665
687.1313912987475	295.66842600252755	111.39325691363521	118.24779666879837
688.5452646848057	300.95448530368463	108.56551014151883	114.9076615963545
690.1950172288489	315.23488558663195	105.26600505343251	110.97921856095616
690.3948565532713	320.2496949229634	104.86632640458772	107.75987878136496
690.3200745172132	316.33784484762464	98.31915715491552	115.58357893204249
692.5479175952257	314.2439156504573	90.49766808033695	119.77143732637701
683.6409767883735	317.83663414515144	85.18850501181139	132.40575292175757
682.2312712172486	329.8808437458922	84.60146390721172	128.75604720137287
671.6979575718224	333.0521112475393	85.6165440932739	122.41351219807865
670.798960519447	334.3039380801178	84.15131198408109	123.17308474686547
670.8665073772117	326.3473292482521	84.01621826855153	132.58537990143628
663.5666853670261	324.0982702141397	81.66815018584101	133.69395554904492
661.4680275059997	324.369183945081	82.49876786552221	136.51882612953415
654.6038720956585	324.47299361090154	79.11324195793156	132.8884394522386
654.6570014126639	324.9455466086841	79.00698332392092	131.9433334566735
645.591063092601	325.48084965180897	80.65986519381968	127.57692841637831
645.3677785206008	328.45241788113617	81.10643433782002	121.63379195772396
643.6503992795197	330.28598981097116	81.36442089107952	108.43633231134564
637.7292230130728	341.361607627906	81.28126360718821	110.13611631104615
634.6689303277867	342.30136544120694	84.395976588414	108.25660068444432
624.5481297048267	344.8648221464425	83.44104640483712	106.15776319247266
620.965655913255	356.1512571507939	84.6451033003913	104.44801059033202
619.5894425347286	355.8000943510181	84.42377097393299	105.15033618988367
