# Supplementary material
Source: ML conference proceedings conference paper supplement (https://proceedings.neurips.cc/paper_files/paper/2022/hash/1c8c87c36dc1e49e63555f95fa56b153-Abstract.html)
Supplement: Supplementary file 1 [file 1c8c87c36dc1e49e63555f95fa56b153-Supplemental-Conference.zip › GOT-10k-Results/VLT_SCAR/GOT-10k_Test_000069/GOT-10k_Test_000069_time.txt]

0.018889
0.019200
0.019190
0.019381
0.019262
0.019646
0.019540
0.019530
0.019310
0.019182
0.019074
0.018944
0.019126
0.018973
0.018915
0.018841
0.018661
0.018551
0.018515
0.018257
0.018451
0.018406
0.018359
0.018330
0.018370
0.018334
0.018238
0.018739
0.018531
0.018372
0.018278
0.018347
0.018576
0.018622
0.018506
0.018410
0.018495
0.018343
0.018339
0.018290
0.018431
0.018461
0.018353
0.018415
0.018299
0.018248
0.019148
0.018447
0.018811
0.018626
0.018414
0.018383
0.018805
0.019307
0.019655
0.019528
0.018687
0.018530
0.018393
0.018404
0.018415
0.018352
0.018451
0.018379
0.018414
0.018350
0.018379
0.018382
0.018428
0.018670
0.018595
0.018709
0.019039
0.019008
0.018866
0.019155
0.019185
0.018953
0.018741
0.018431
0.018323
0.018484
0.018396
0.018387
0.018379
0.018458
0.018351
0.018832
0.018700
0.018439
0.018458
0.018614
0.018441
0.018527
0.018412
0.018418
0.018675
0.018498
0.018335
0.018170
0.018381
0.018311
0.018113
0.018481
0.018454
0.018171
0.018376
0.018324
0.018251
0.018242
0.018309
