# Supplementary material
Source: ML conference proceedings conference paper supplement (https://proceedings.neurips.cc/paper_files/paper/2022/hash/1c8c87c36dc1e49e63555f95fa56b153-Abstract.html)
Supplement: Supplementary file 1 [file 1c8c87c36dc1e49e63555f95fa56b153-Supplemental-Conference.zip › GOT-10k-Results/VLT_SCAR/GOT-10k_Test_000070/GOT-10k_Test_000070_001.txt]

689.5	374.5	74.0	152.0
691.2054543992226	374.2500000020193	80.10607656875787	151.49999999596133
701.4084006426332	376.2198271470519	84.92648566764656	151.16410307528338
714.7978880836782	377.7151906853363	87.59709719432405	151.85457429981048
726.5975164045992	380.656678279269	90.1553991328467	153.4451872777636
734.5586996550827	394.514366975073	100.85909563580256	152.35587289007822
730.1581645037911	397.23708991085675	109.66016593838569	146.91042701851072
727.2560450651321	401.4453497237316	111.43458313823277	142.523729070232
714.1062424799263	401.0255221751099	121.76680999598003	139.37153958930935
716.8010237918186	397.5925346116994	116.37724737219565	146.2375147161304
696.9754823189355	401.8957318459956	106.48061080029085	145.88907350048314
683.8494266184154	407.93202355000756	104.99736781606614	137.7786835760686
685.466143361052	416.1090660723795	101.76393433079295	125.23912017265499
677.6285015817735	417.2586643932679	85.30859498441919	122.93992353087822
675.2625374324042	418.0705667890547	80.24225113629879	121.3161187393047
689.9552281914852	410.3140640296399	79.27552167150354	117.88335622255642
695.5726375342997	414.0248113684479	77.31054114430592	113.55180759775087
694.1833971066026	414.7163571773623	92.05753900239456	109.1765867292485
690.2183627921876	414.56455524936547	109.48612745798445	109.48019058524213
698.5512884430469	412.7993139730758	120.40658393870432	113.01067313782139
729.7399638004449	405.42652695693454	113.1602479811512	124.08084618628774
748.8868983584629	389.45322714716275	104.74710317428043	137.35199311260308
779.0740114204439	376.7315756369382	93.82397348753963	143.7756436571979
799.2704340384603	373.965835665821	83.1990998209167	149.30712359943232
806.1885971721514	375.04157069551695	83.86007657213744	147.15565354004042
828.8183108903733	376.3735049543941	74.63807948897421	140.88804198695797
843.121349453207	374.4374464414818	66.1547135656574	144.76015901278257
846.6192736246213	368.43294096074686	62.4221818493411	150.24253672122782
867.0112299370517	366.0722028796112	60.960879200796754	154.96401288349907
867.7318365422	368.32949339008593	62.83852063331568	150.44943186254963
876.6382202929369	372.2537645855408	71.32384021818041	142.60088947163996
873.9285550094191	380.34460577552	80.06498596394945	139.7064678066158
871.7831269991999	386.197888351537	84.35584198438794	134.85781980506994
852.0211853485503	389.57703668569405	75.87086177441154	134.9579322097952
840.320663857695	390.62412542477045	76.26025284294747	136.1511335763817
905.7324900828547	338.3340969260337	67.96775874902856	151.31656150296843
905.1926668578288	340.1880218706202	69.04740519908022	150.9990714204951
913.7475978483706	356.695201773721	75.77035735105531	141.81752574735202
925.0260526967443	369.8970781957671	80.30853653413847	135.735089563133
925.969441206207	370.3943902952716	75.04760557755878	134.74046536412396
921.8372660911697	379.7852998496262	83.3119558076335	129.03921949669126
916.4303948624193	380.8857457267317	94.12569826513408	126.83832774248029
917.9733866754971	390.10929282111715	91.03971463897865	132.68264751306356
901.1481337931945	402.81880843068626	89.61126837746438	131.81888271220907
902.4712980143391	401.49298142305315	86.964939935175	134.4705367274753
896.907322819579	423.97892750755176	70.3564694286525	141.5044337385582
888.6964156285181	426.506393384618	60.46610735860866	139.73852404094643
877.6195112065134	437.78000061650056	82.6199162026182	138.8242699058122
842.4434474313636	447.2826670660015	76.87151196686501	154.41008781865258
827.0123422657725	459.3366533133857	82.59886788376808	155.43696973816333
808.5809221545375	466.8344597606665	89.82601481468136	166.37258847371373
798.7569664824157	479.4978363140867	81.54848264403901	168.9712788817592
704.5453433009412	332.23334779972583	91.27669354852537	164.38030525175003
722.724190703028	324.83987318364166	98.75106501972573	151.27412139958943
728.5033262513186	325.1419005367161	98.93966783785045	154.58569133167595
720.1022259356371	325.775594432922	83.9945899481169	153.3183035392642
715.5720760046224	324.49489119766986	93.05488981014639	152.18257778572178
708.0556542827655	323.8912387623161	96.58620772852196	149.55604081464975
697.1193695722991	318.9971539884747	87.6287662953321	151.63670764880206
667.520851916129	310.28232076905505	102.01659217261164	142.927668583856
634.9188664093232	319.1236637007137	78.81050634179343	148.30847581038995
600.3712225233462	310.63324965738735	80.7490343991277	144.08190609242584
580.5515961681795	310.83123779292987	92.34548626966581	143.68592982134078
585.8777479789223	305.5180589877847	74.30321895637019	143.22734189391667
602.8459299236209	296.4414018148685	64.04376589537488	137.70374541134723
626.3416819681431	299.6142668260965	67.03204866676205	128.23427871011424
653.1819226948135	305.6573931555191	61.94459984903327	128.29628421017202
676.4964632278858	312.5831329967982	59.56570909442682	135.09489333966502
720.6791228829445	316.5085043788031	76.45518017139558	121.22959112496468
752.5142915603777	319.64160212799845	77.74033598216708	118.05651434874723
793.1929861679482	319.27487507941544	66.92463746580353	118.7899684459132
794.0881875447061	317.9726805148674	79.61416468227738	121.39435757500934
820.3394500031847	313.99313314129375	74.33685049361728	129.35345232215664
847.0882023316075	307.53583680945513	55.80102906514444	129.554705630062
859.2680900675567	307.4367875766372	57.18697152632832	124.03153344390182
877.5106976573555	315.1509236052811	59.97005674269007	117.0178971857482
877.036468878751	328.2466235155134	63.66929116156348	115.58348912026196
882.255699835258	333.7138117729986	67.19645409084215	107.44223757375009
882.9225979541704	333.2093348453196	82.25404170643125	108.45119142910815
916.3349701394379	332.8265022654688	84.34050792449796	109.21685658880973
963.0793221662167	333.13838806235435	85.14907176563082	108.59308499503854
999.4331568682643	319.24733251308106	85.53263610232547	118.10238765838764
1049.899954125832	312.95887413852967	80.49643745369366	127.48272454527361
1086.4328273609765	313.24763062992065	82.27957999650542	126.90521156249167
1106.0529726626874	323.1786883345289	85.62020238381109	123.42037038047786
1115.9053585278648	324.53897914490926	88.86489299295584	120.69978875971707
1135.6479616490406	327.6735927411437	98.74015224139701	114.43056156724816
1164.8331005119219	329.5622932211553	107.46477326067802	110.65316060722498
1181.4917283574696	332.176366978567	98.19137198596815	105.42501309240166
1179.6161316145567	332.2599700277274	98.73651413469182	105.2578069940809
1168.2318322429876	331.0126493416625	102.23252134697222	114.17664554316332
1158.9513344140187	330.72972253245035	90.13303300753815	114.7424991615876
1127.2199674971664	333.7877762946566	79.52283976958587	111.84695368376885
1079.2166756560764	324.4634922881023	82.43857528756642	109.47500759528391
1057.8646467271224	324.842026855868	79.92132161188613	108.71793845975252
1040.6186251670085	314.3949362442175	81.83102415415298	108.87790295162416
1017.4059036197334	313.3116889638177	83.32052085601119	108.04866775291097
1025.046295429014	311.75860978526754	77.06191167341326	111.1548261100113
1039.2576429373203	302.87233743647397	72.25410982754738	114.16806257588163
1038.660731479429	293.9187239279455	73.44793274333014	108.73790762083144
1053.839541096187	289.5142840738798	65.9349566117462	111.83562655347964
1066.6324589718333	278.2996688019511	62.557990698951656	114.83209598865176
1056.049252363395	270.62358443369834	69.909130295851	110.84288165718907
1045.449048365566	268.5224342973194	71.31226802309739	106.56063752919911
1051.9612999891287	262.7835130937733	55.5004006300681	106.88902335267863
1026.8512162134293	255.35313844526954	47.64329398709927	101.54898162555827
1003.8794029755232	257.01172488340546	35.8162707492416	100.5426347378332
974.8931395962561	257.98846449473643	45.81016991225165	96.50312822840928
926.954102945144	258.78380908449105	57.88599819355251	92.7071168115074
912.3558412064968	257.68172535547404	51.74788776623329	94.91128426954135
916.8273868513473	260.4161169061747	40.5203468903009	96.29584992683418
909.6528913210898	251.34674979383658	37.99452687088875	99.66912445657394
913.9992223772791	247.91406335526267	44.09174617282907	100.19597672758503
907.2346009252623	245.64083770069738	53.16320831224408	95.82686650747836
907.3404640694754	248.00254885537925	69.20637080531058	93.42557116689933
917.0942866832621	247.9677178251655	65.02286484932198	93.49523322732685
829.7750205131158	329.0508514542089	68.10942169661527	102.88094146223919
824.2512356964818	326.8904653431294	63.08415331551436	107.20171368439817
799.8903861991865	324.5078156738131	66.60162656513276	109.30794092038536
779.9080946315374	320.0836695578258	62.57030199884998	109.9070004583136
755.9714961101578	319.3310689395583	67.39578138088078	108.72171934105302
795.7002619191358	404.3864866019095	67.81437008326826	125.90661442267248
791.93308915358	400.75601047461436	78.36495260214016	133.16756667726284
795.979327529592	393.2789945458639	80.18193734836622	138.21213703651384
795.8952520643269	378.13948634568925	76.94129978807896	144.62963400114077
810.6571463906636	372.31705771862437	71.55603453957832	139.03268882371844
843.5500475234501	365.68933375626443	81.06120454312753	132.64701354779783
857.8169600483004	363.11076594225705	85.93619959396972	137.8041491758125
882.1686463991257	348.81872669129336	93.22835426945761	138.39046398917066
886.8471721549002	348.9243716859461	91.13163190845222	138.1791739998651
889.632599268265	349.09907409500585	89.1529198179268	137.82976918174563
881.5527024561839	346.6912470395875	98.20486897453684	142.64542329258234
882.767734549912	347.40953394128036	99.55154662687514	144.98559132899118
864.0198569782947	359.69268386079534	106.37269792610056	147.25956985346937
860.3998801381591	357.6793862270559	105.65022554140985	151.28616512094825
853.0484664334211	352.86729620321466	96.17152436667877	160.9103451686306
859.3369728128289	361.5428621714226	79.5781982644808	167.6570932925106
846.0826928783921	360.57767867365544	75.43713892601187	165.75625788712705
804.0106191391798	360.3183253152627	81.22715048589234	166.2749646039125
764.7176399441516	342.10760725548266	71.4997424875186	175.81841964873303
717.118646314971	342.3811336402878	67.71126396590006	175.27136687912278
658.4166656021648	342.5467571385109	69.4357956976472	174.9401198826767
628.8483087434352	340.3852774448088	68.44921417977908	175.50537331787277
599.2269802706427	339.2319063360702	67.72093994505462	177.81211553534996
577.9424654475621	338.8849400164894	68.83933116473871	178.5060481745117
563.4938804286403	338.16144312501973	67.35024889657039	179.95304195745098
548.2616823312075	341.25090021868806	67.47647826397755	181.358669476979
532.6322762322417	341.64399431378905	68.21779497934307	184.38716822209776
517.9949870371174	343.38084336543494	66.52088376374132	184.78490631953727
502.4212859992902	347.0899506167132	66.89664702951556	181.2131466682158
490.84103429862995	349.07567410712886	63.44214412551438	181.04384344528762
497.0133076993711	365.4668561351296	69.7833945814161	170.68443609814702
538.6835792488042	365.15721960066253	71.60296906390391	171.30370916708114
594.6477935481306	363.2649530974848	79.47870953708875	171.34436188994167
657.0797371387742	355.73666069997864	71.10997369947259	166.98508812767548
686.3802173541446	347.86971763386447	67.60019013445515	168.0279937623776
741.3946755694859	348.93773768679387	59.08364761795499	165.8919536565188
751.2355924692221	358.06423170130677	60.051756822141996	164.8472514638757
757.3707089894708	385.0918118651457	75.33553258954832	159.01160655002974
753.7458987497852	387.446800947083	82.58515306891962	154.30162838615522
754.6774779636008	389.39961305653975	80.72199464128826	150.39600416724167
