# Supplementary material
Source: ML conference proceedings conference paper supplement (https://proceedings.neurips.cc/paper_files/paper/2022/hash/1c8c87c36dc1e49e63555f95fa56b153-Abstract.html)
Supplement: Supplementary file 1 [file 1c8c87c36dc1e49e63555f95fa56b153-Supplemental-Conference.zip › GOT-10k-Results/VLT_SCAR/GOT-10k_Test_000070/GOT-10k_Test_000070_time.txt]

0.018854
0.018899
0.018473
0.018496
0.018422
0.018347
0.018895
0.019069
0.018869
0.018910
0.018919
0.018417
0.018579
0.018319
0.018277
0.018294
0.018261
0.018438
0.019141
0.018495
0.018933
0.018749
0.019006
0.018513
0.018801
0.019080
0.018698
0.018794
0.018813
0.018615
0.018621
0.018523
0.018417
0.018382
0.018409
0.018343
0.018342
0.018078
0.018223
0.018154
0.018790
0.018590
0.018855
0.018978
0.019298
0.019288
0.019053
0.019243
0.019115
0.019445
0.019664
0.019145
0.019008
0.019101
0.018798
0.018946
0.018975
0.018821
0.018895
0.018753
0.019494
0.019431
0.019686
0.019423
0.019428
0.019871
0.019807
0.019739
0.019730
0.020525
0.020476
0.020028
0.020139
0.020415
0.020142
0.020505
0.020580
0.020248
0.019948
0.019092
0.019329
0.019366
0.019207
0.019224
0.019255
0.019723
0.019870
0.019121
0.019523
0.018954
0.018943
0.018944
0.018935
0.019131
0.018913
0.019161
0.019091
0.019383
0.018989
0.019266
0.018905
0.019522
0.018883
0.018844
0.018916
0.018729
0.019608
0.019610
0.019301
0.019274
0.019004
0.018758
0.018928
0.018897
0.019175
0.018767
0.018873
0.018868
0.018687
0.018663
0.018389
0.018249
0.018678
0.018646
0.018335
0.018198
0.018463
0.018382
0.018490
0.018806
0.018910
0.018517
0.018514
0.018481
0.018446
0.018571
0.018502
0.018403
0.018270
0.018442
0.018270
0.018388
0.018391
0.019027
0.018717
0.018589
0.018544
0.018307
0.018322
0.018343
0.018485
0.018610
0.018689
0.018301
0.018443
0.018312
0.018361
0.018616
0.018497
0.018526
0.018430
