# Supplementary material
Source: ML conference proceedings conference paper supplement (https://proceedings.neurips.cc/paper_files/paper/2022/hash/1c8c87c36dc1e49e63555f95fa56b153-Abstract.html)
Supplement: Supplementary file 1 [file 1c8c87c36dc1e49e63555f95fa56b153-Supplemental-Conference.zip › GOT-10k-Results/VLT_SCAR/GOT-10k_Test_000071/GOT-10k_Test_000071_001.txt]

655.5	85.5	623.0	522.0
669.4447406093534	89.97810838967001	594.1105187812933	494.0298334315445
720.5622597663889	97.03543402329251	560.3472373101089	479.9151821642995
725.8929773239277	104.27590958081646	533.3159634077219	465.4342310492516
720.9891978957688	112.75705621308438	527.4042574470634	448.47193778471575
749.3486910932074	120.77601365635843	516.751940091339	447.789579244552
793.5976389237478	104.5808210064123	504.1536501206739	465.0000434063611
745.1175918547187	96.59454124566327	524.8180002696009	465.7134541300329
720.0275967624866	99.0825594337735	543.8140372667789	460.73741775381245
689.5952172242808	99.33359060272988	573.0664410413198	444.42917776496427
653.7025474212462	107.3139220311667	596.8772590462945	428.46851490809064
646.6797887763576	104.01248169582789	610.9227763360719	418.9787598170693
621.3583138394283	108.8778747547318	645.4173769013144	409.2479736992615
569.3556361726165	97.35445059229215	683.4048502893452	415.7903515377426
512.8527879716148	74.2275556974553	693.3219963627057	444.86271627264244
542.4222507132217	37.486630955116055	669.8172360122076	464.8933180582474
552.1287330073576	43.20389827739632	650.4042714239357	489.05169795415065
560.84562204763	50.491433839037654	632.9704933433911	492.37578181095523
569.6044886763034	95.7130980884441	615.4527600860442	490.36934194453374
577.7217485966403	118.79736779016642	581.8315928839457	496.36074462536357
424.57533121952673	65.6096760886683	599.7013379902538	467.00761525286856
391.5611239453183	0.48278302973974974	598.6655860997312	463.1330684928465
373.05322502448473	-39.204432810237705	602.30708616881	442.3846068550363
366.39668693890604	-20.233335671814558	632.023738099348	420.8459883375705
298.6213584810024	64.71889402508612	635.5981097294459	399.41484989019216
287.8353891874159	48.31078661834056	576.2051700639538	416.0380890531502
342.2347636294073	-0.04510330111827443	545.280927034318	403.72556069598204
406.0222829019124	76.45926899550847	536.9327834105065	369.9437110239272
426.61345294420937	190.498919452471	495.75044332591256	355.17733526403595
458.9304567471063	176.5764153599527	431.1164357201187	383.02234344907254
529.0804933288046	96.99562002058764	380.5247870892847	362.76708506267744
579.2313557046634	76.39682342673862	373.8594516227444	310.3282889651979
584.0790286332099	122.21080745767443	321.1121414224634	294.0412585039055
614.5516105742443	42.55073385868053	260.16697754039484	317.7698691621457
628.0006531736954	-11.409662282540864	233.26889234149257	298.42983655519424
616.3072218007695	-14.324650079054862	239.94080747996546	245.757495522397
591.9061080685757	28.406724516431893	227.55379457969752	213.8353316504972
557.0465939957656	16.54345303370991	179.11992430876708	244.51204511103236
540.2219411763641	-4.258958358532382	166.2089406926204	226.25363885343853
528.6905381232733	-7.817236451082934	164.62213548972764	190.23337524765938
554.9155782525494	53.254221535589636	145.67987049236538	179.78317681161326
570.2480298022489	101.31652602122271	130.3700566257083	211.617644779862
593.7102867232509	101.17402191612256	136.92055603089094	206.55515166534363
587.5554498302115	96.63445843699625	149.23022981696977	183.3470522946348
566.4973777173683	111.15757054752719	159.96311253270818	175.2230024135383
511.48055728023627	65.46126783775381	148.62221745635304	187.45830177833335
525.951212818991	70.23799393122758	172.5185572427626	172.62108450499392
458.221373475335	98.85724197194298	177.53175859817173	153.42947764536814
430.0017553218638	131.13372447093846	171.46861560506233	167.00448677244202
275.5157517286033	221.89173676883374	197.9416565174922	145.39353742613702
445.92924320984	132.32289803568082	185.9655715271578	168.19226339749144
312.74913585211095	249.67414984507013	212.57788191630158	145.36000081126977
97.25688035758478	89.3505870239469	222.66886922425465	162.96378940312468
90.79973155508209	106.54381593653957	229.52843530026112	177.01518380993042
100.8191419015371	144.2206458907722	241.43409026011355	191.10605572920002
67.43078157554638	277.42503337439763	260.6099799190561	162.7014357271437
44.30872955423439	326.3921176670759	267.1245213265606	150.84798618454602
-61.60443611612604	109.75819843780494	224.73880436046483	193.0203657095239
77.33290739369578	47.74050619857519	249.27466095195572	172.42462063483208
216.2840109542948	59.37987890244435	282.19788592486424	149.14587522709377
315.3372335933156	101.96334584900826	231.74530455278432	178.07510889766363
347.33033302104513	156.7091023484163	206.3991894788817	178.06383327992413
448.4123022638801	115.04624656188781	185.74795522935835	170.63319273490777
456.0060892546065	84.04360892203763	176.17142075084584	154.08391497344502
479.44380294388566	113.37934321032026	170.87969507738472	142.19411081511407
467.3419616229672	136.51322921392324	160.6075408622663	135.32729521585713
503.5083069109374	136.55591906762933	144.14850705962783	139.8980535728868
503.80239787583116	144.37325046905116	152.50642308524178	128.73643974774393
504.1727923969736	166.35479944365582	160.6157640509394	120.17386183046398
516.3923399980774	185.06676030582537	175.87029402371775	113.62275968666964
522.5146468938152	181.0771821157275	163.6256802322423	126.1344375312299
497.23218592737817	220.97820647981428	168.65467755939792	128.29705309334963
483.3188482640747	233.76805968290333	182.48456563277966	126.04532544254694
494.06072008222526	240.8316503485745	194.86942686309828	111.91814411120455
519.2085728896751	221.78539468522047	182.86928362641993	116.50203835696904
510.09804616118345	185.48462335758336	196.404879929665	114.13626655243084
521.2795724462683	200.84580718163528	207.97306113801994	102.8031753491982
580.9770249079079	218.71576926526816	199.5196912546595	100.82806619408173
622.4524312175804	216.48114326470227	191.21867443589463	105.29731819521352
642.2138331669638	202.39580384837694	184.03777879231194	110.366633988447
622.771521695942	179.11024974089491	190.7234039389811	106.33931709639438
623.9569151518049	198.6069719197588	192.98334414392798	99.76096255537317
640.4506972648051	202.2409784501871	191.85512060724417	92.49294949451657
600.7039005398981	235.29102328084758	178.7587845007971	92.52852380195347
615.6904288901894	275.68668501815426	169.87543624946633	100.31397581419847
555.6650129798809	287.44369110995433	154.9006568176008	106.3368160920788
524.8848857470845	286.87506445634534	155.01842449595316	107.47406939929685
491.6861849321268	287.5841929908545	159.66452661149015	106.05581233027851
455.4870746768342	287.45118240969555	169.61433455066287	106.32183349259637
419.76023838509116	300.7186059654761	176.3163244232561	105.68765946539234
401.1728172171295	297.8266011537063	182.64882458603904	107.06562020705485
