# Supplementary material
Source: ML conference proceedings conference paper supplement (https://proceedings.neurips.cc/paper_files/paper/2022/hash/1c8c87c36dc1e49e63555f95fa56b153-Abstract.html)
Supplement: Supplementary file 1 [file 1c8c87c36dc1e49e63555f95fa56b153-Supplemental-Conference.zip › GOT-10k-Results/VLT_SCAR/GOT-10k_Test_000072/GOT-10k_Test_000072_001.txt]

335.5	205.5	71.0	82.0
335.64331143697166	198.42076505622708	64.8975940761745	83.1190122628403
335.3307078135194	197.8773098591911	63.19625093952982	84.20592265691232
334.3311395156644	196.6162860754875	62.87999579196965	84.4125784810494
333.3965918383085	195.3895253725556	62.43572786432601	84.55273660455775
332.41522869324154	195.49633520899937	62.09023545567615	84.33911693167022
332.4243593068269	195.62419914325537	62.071974228505475	84.08338906315822
330.5184801914568	195.28965805043032	61.29348359377595	84.75247124880829
329.33618666556947	194.5276270631606	59.07305731667961	83.98402655891229
327.44852865260896	193.32888341054831	58.35974895152709	84.13720166860011
326.0706093121259	192.52366612562415	56.64589105085442	83.51278794762902
323.51021698651124	191.56331641166827	55.17548992933625	83.23642545129164
323.0767502701816	189.11355867297797	56.042423361995425	85.96745332909387
320.4593724125307	190.36325367115228	56.82932292357013	83.46806333274523
318.9412768322606	189.55772686612727	57.666085632224934	85.0791169427953
317.24684222818377	189.2272276094753	58.817385972935895	83.50254658865646
316.70599812404447	180.54186690624866	57.66625965644755	83.01075179697442
316.45648452513666	182.65099409031353	58.16528685426322	76.58611808759174
312.2861968346596	184.03607196740876	60.154542623502294	73.8159623334013
312.3553136895283	185.4528101468731	60.01630891376486	68.87545835143354
311.7231294471154	186.71477996867085	59.25208479990515	64.32292610915249
306.2772441423216	179.45153749088115	60.415587832441744	63.284182941450226
306.2467839054056	170.62968730589526	60.476508306273644	65.34470785796947
307.6988040176588	151.220410221721	57.5724680817673	74.44727715791842
307.40679311899925	150.5616008394832	58.15648987908635	75.7648959223941
305.61918816563764	143.21941275100008	57.522828247657316	77.82265748490339
303.4609868526035	139.7490928828454	57.58838474114543	82.63787415492268
302.2164412966644	139.6544054079396	57.87801450536238	82.82724910473426
303.3795173321904	138.8224045203683	55.55186243431034	82.28414557766106
302.92686228360213	136.25080279466036	56.457172531486854	85.26693310775384
302.1008671404219	134.1921990562449	55.88884554270106	87.16382330943844
300.1994482216081	133.91347695329245	57.452385563895874	87.72126751534338
297.106289303295	136.9978366410114	61.36496150125211	83.8262900391755
296.02060132757686	136.04041331804632	61.256711479865274	78.90225876663634
280.4431638344743	112.68128666900358	57.16597886559664	88.1720539892185
275.6725916781211	105.79782654468784	55.32847578091392	88.28459736098297
280.38960719780596	104.80483566932952	57.127877866692046	90.27057911169959
285.4389856144379	137.8674440374559	63.174755879124696	81.80834396722025
297.39155002980243	156.76047035166928	57.49746147767281	91.87035671564583
284.05795715505207	138.18102675903876	63.13500957570159	79.96008938080553
278.06115036446397	131.1578555515263	63.88078072208025	73.76031541319475
270.0072015461795	90.1601262861954	51.82833906934005	86.43801569324933
271.6241564266342	85.79880283388695	50.75473135595358	93.00036055034325
271.80470870016916	83.75062968633898	50.39362680888374	94.8574190991604
264.1874007381459	74.03380965178842	49.804982673349336	96.2073333858834
265.6912645059595	71.42712998442722	49.06744745986306	96.88030807632398
264.9706945454448	60.035612545080845	50.508587380892465	96.98987981892138
259.1903602267821	51.41242486314286	50.600279679831566	95.8858930413794
259.2098180552666	42.376890968260206	50.561364022862605	98.0029566118324
259.38446355178405	31.332043266588997	45.59291137292472	96.99684373066006
258.54698433418787	23.593072676827305	45.05914187979994	92.59623355532904
261.92195682655995	12.957489540740646	44.714920967723764	96.78546896705448
251.3964518811242	9.193385160467557	48.24346206441209	93.36213473123621
245.16424341963346	6.8601683563916325	47.498706813598915	87.02092486122591
247.03052149057055	6.443059177777805	45.861587664569036	83.6642692327651
245.93284564526056	6.748980361853334	46.03899721014968	79.01654257453538
239.79910611729548	5.52474183314316	48.54555199272417	73.6562802132712
240.87238807787935	5.212980115489323	46.39898807155646	72.36554956823207
239.796698141703	4.768834846247216	46.69126964949335	71.39474181230042
237.0050825787389	6.116458383480051	44.87681623068758	70.54891587401823
237.15706692950573	6.597181832468813	44.57284752915395	69.58746897604071
232.60534952382943	7.717125249006472	44.741392361814846	67.3475821429654
232.87639836093052	4.769873509199961	44.199294687612685	66.21735402661163
233.34499102956983	3.4992739125673253	43.26210935033407	65.2981924833962
226.61654188263395	2.535919162853091	44.81352548764599	63.823335652379
227.64785363580964	3.1378832609837772	44.45515802269649	60.91515141471572
228.3242791883689	1.4133143635343082	43.10230691757798	59.40137201694586
229.13324254157982	1.8057431514600601	41.484380211156136	57.007393150296984
229.91677817610952	1.710367649107475	39.917308942096696	52.55946007149039
231.78378387137076	1.601065332822884	37.636218551168334	49.87222270487139
231.69209406553674	1.427309560065538	37.81959816283637	47.47030702246817
229.85442895399657	1.5359962642771663	40.153931592830006	44.57094002787157
231.11495382911647	1.2967669100784889	37.63288184259024	43.71560216244949
231.90033909102144	1.5511070846005133	36.06211131878028	41.926738966952016
233.24957819090852	1.819621958272041	33.36363311900614	41.38970921960896
235.1966612115546	1.8984344556191566	30.64498750601961	41.23208422491473
235.33023636951955	1.2517927100344757	28.12014021164456	39.138822248416375
237.39352391133184	2.4982980210910952	26.10483886350731	37.7014484940468
236.7574657576368	2.798412963599329	25.37562336368979	35.09988680182269
224.4957417943673	-1.1808644945075812	32.811901013013625	29.76842039131359
221.6723907218596	-0.1382600001692449	35.50292676917866	27.683211402636918
221.86552443758077	0.2058507488735941	35.116659337736316	28.98129082641261
224.27758019821454	1.2457013619295587	32.309067483873044	30.93462893510911
223.66891376369205	0.4645757609987786	32.530495430487264	30.505070292109227
216.15459902410453	2.591820440739287	34.65587148028544	28.235696844840035
214.79517811880038	2.153798880364869	35.39645846020474	26.144357719555348
214.72983948208994	1.5540683553086154	35.52713573362557	25.411009360586267
214.60885860517342	1.866487555982685	35.76909748745863	24.786170959238127
217.97888552819936	1.1091186693986952	32.82783150509276	27.250605698327618
223.5370559942839	0.18427676259422654	28.327172262348856	30.990484280343743
227.31607282498769	-0.5758099452749814	26.372543996696628	31.57675679678961
230.83080123643506	0.03684268673549873	24.81308874127185	30.35145153276865
228.45172408537712	-0.8886869322488611	26.968330037844552	26.996684759651053
223.2949655473898	4.057827566802571	24.534206262984426	30.701139335771938
224.60072783107503	3.955174682969904	21.922681695613967	36.117394314461876
225.22551291665965	3.476741913355859	21.58026894139284	37.074259853689966
235.64047331668115	20.676181206454388	21.809174434906012	36.55262356582243
235.81995578534617	16.73879622767162	21.45020949757597	38.045337878011495
239.61571227034895	42.27347638108417	21.280944712655888	42.64283895932725
238.13338395608994	42.83296420440087	24.24560134117388	41.52386331269386
230.13531747321852	61.383167185890166	24.840253889592255	47.547602518223854
