# Supplementary material
Source: ML conference proceedings conference paper supplement (https://proceedings.neurips.cc/paper_files/paper/2022/hash/1c8c87c36dc1e49e63555f95fa56b153-Abstract.html)
Supplement: Supplementary file 1 [file 1c8c87c36dc1e49e63555f95fa56b153-Supplemental-Conference.zip › GOT-10k-Results/VLT_SCAR/GOT-10k_Test_000073/GOT-10k_Test_000073_001.txt]

293.5	213.5	179.0	146.0
293.8876977047237	208.95835608044064	177.2246045905526	148.9717778611309
287.7074991488628	203.5973816362971	174.18860691349948	154.5615951531597
279.60769158230255	200.8026389842177	164.5139151028772	160.15108045731847
269.72369650587666	203.14297209855428	153.60559026088418	155.47041422864532
271.0166194390443	217.5121472389062	151.01974439454895	151.06864647147881
253.75246210798244	228.40001268075255	161.76157166482272	143.5648080228961
256.2951680386777	228.2376976867974	171.094622267437	143.88943801080646
254.5710648665001	228.4474668792615	174.54282861179212	143.4698996258782
259.5225743070066	228.83921198022375	174.64399825614507	142.6864094239537
262.90544436430895	226.86092023464107	172.86924799629674	146.64299291511904
263.80850729026747	228.27601888858374	171.06312214437963	148.84024504100464
266.04980506046866	221.81624738984928	166.58052660397738	161.75978803847357
270.3270685072807	215.77966008429624	163.19657399662492	168.6623883633079
275.29637394329444	209.92724096442456	158.48391130134678	175.141278426302
279.57244950153654	209.98100895531718	149.93176018486258	175.03374244451672
275.58102237307025	223.8782392175038	152.8008658333853	167.69427635378304
274.3244837199396	236.3524031857325	165.40555316805907	152.83755844573818
215.4561248618117	94.82357057027986	127.8097829637053	190.36967825374438
204.90407032374006	46.82011932691731	104.0360403422597	216.56658921088683
219.43723136523954	113.06139027627715	114.73372218169712	198.40555858917153
215.26804149854206	227.96669102908047	127.95922040302256	173.85393357664344
237.25315346044593	287.1179110897443	121.9026376404492	164.55321179386465
257.71426090935375	325.2643991607264	116.96920548811491	151.24060545649283
203.69760397861316	243.0913754755337	123.83898229474262	138.55046298088453
292.51340666884073	146.65528046800776	103.16612006706282	145.5504571571235
306.0848425408755	226.3550616901125	95.53601065235918	142.25299334784185
300.56221784399577	255.93266739656303	99.12806486048464	127.81695304874538
290.2766316361698	299.3956297567519	80.4645357063302	140.76117777878386
301.06241672919276	318.6581402800231	86.50390108742486	136.74982619116722
291.83728850574914	322.4979626130322	73.51288178692309	143.04408185732188
277.158613768438	280.03337408938194	75.94133049519003	130.35599362658422
281.7083646784615	260.27505475830696	63.62142950577537	147.32983810316105
281.3033318641059	244.41599002974363	54.663424373216024	162.76784962483677
295.11691665679007	265.81873821772837	50.2526197421014	182.97820098184138
294.19089640632603	270.62770023241137	48.58355408955439	187.4447015663759
293.91349414241813	265.96085359545106	49.13835861737016	196.77839484029653
293.4118804343714	269.5915426297331	50.14158603346358	200.59932278657624
294.42310824521	219.6359054238358	51.885894316685935	198.807971766084
294.11192441384236	222.1888962364226	52.508261979421306	197.47662247868715
292.987012621821	234.26228445074966	54.75808556346402	192.16808703477722
292.5325458720783	254.3162632605588	55.66701906294942	189.4105818661435
293.6135395097314	253.22503791930623	53.505031787643105	191.59303254864864
294.29425260980827	254.25089515477327	52.14360558748949	193.24481807713835
294.9540532555498	177.9383927413436	54.525230285333116	201.52200932025264
295.0335314350739	169.47016746851875	54.36627392628503	206.87082349807804
299.0723233950262	213.79585669856073	54.15832101612793	224.459463669587
298.2334486928398	174.01098911034694	55.83607042050082	228.82970341119037
298.1324494659497	178.96648225540292	56.03806887428095	244.54451732430323
293.9662941402546	124.22295116823365	64.37037952567114	241.66036660949956
294.5919097693314	124.40968679427877	63.11914826751759	264.35075749330264
293.9686159333679	127.74054182939159	64.36573593944453	282.22681012179146
295.7316628629849	166.84940097221	66.02121186201833	271.36949899965384
296.7453558588752	172.13985817172824	63.99382587023759	275.9722891523494
300.1432052676331	147.74924971209492	62.28508840553302	289.1447766019377
299.5783815553598	151.68451526567026	63.4147358300796	286.51236889507607
300.31128788857814	165.58144458631222	61.94892316364292	284.8343593308301
302.7353836220235	177.78682150509798	62.272207942281185	286.2809867209038
303.7876182459561	201.24655915159985	65.36564711134957	270.5489619295015
305.5854203473125	144.93987305357757	61.770042908636796	292.4919589587046
301.94256126218426	145.75636574357856	69.05576107889331	290.8589735787026
300.0084957422015	151.13157799187164	72.92389211885877	285.5007139293446
301.44815060021045	163.98543931585834	70.04458240284089	297.527120376908
300.7602339462298	167.84710965732538	71.42041571080225	295.30820399992564
303.39435209867645	162.19301882126337	77.15140753719598	295.6171575407626
302.09512619028317	143.220631095567	79.74985935398246	288.6605053998185
301.0126471780128	149.8794838515982	81.9148173785232	280.9064544359245
301.66313333282346	165.61600286421145	80.61384506890187	282.40151645372987
302.81055387605204	184.7697695784278	83.81054345657583	282.5347593442148
302.8986313271471	169.26879275992565	83.6343885543858	285.7718959174791
300.9006413992354	144.13131452458822	87.63036841020919	280.09231914261215
298.9860906560908	149.8749240482893	91.45946989649823	274.19419992503197
298.15972253293825	177.64082311031993	93.11220614280344	274.4190208433394
298.8848743353956	177.0142831852009	91.66190253788875	275.6721006935775
299.68700017861875	195.7502905945657	95.65804878230401	266.20207552915605
306.60974000654295	149.0676121306127	92.8887736749526	270.9577960690858
304.87214723149475	164.12388491156688	96.36395922504897	268.6235886950648
302.6172633858285	173.02106226799043	100.87372691638151	273.17125127807674
303.79036279701796	178.87862348648247	98.52752809400263	278.652462429018
309.2789204279213	184.37977086173677	99.08646655266926	284.9542482592196
306.80613454538206	119.54943600700247	104.0320383177478	267.91154295231144
307.7513852341649	118.46120902596812	102.14153694018216	264.37452287157225
307.4763909412493	127.68011179851524	97.06275219072438	262.8230373323451
308.94317611421684	132.64229394253599	94.12918184478931	258.41382756380204
307.9832191353676	145.1059890146803	96.0490958024877	255.0826529933726
303.31551931185004	152.86210311322904	105.38449544952292	239.57042479627506
305.5325792270738	104.41310590907895	100.9503756190753	251.21051632712852
304.61481741905266	117.76309067681117	102.78589923511767	257.0195328047038
304.36414402811533	138.08456762917376	103.28724601699236	260.652999167306
303.53334347445445	153.7548775366898	104.948847124314	268.48294102444794
305.3440214392345	156.42773321690146	107.06560042682608	268.87533889609676
