# Supplementary material
Source: ML conference proceedings conference paper supplement (https://proceedings.neurips.cc/paper_files/paper/2022/hash/1c8c87c36dc1e49e63555f95fa56b153-Abstract.html)
Supplement: Supplementary file 1 [file 1c8c87c36dc1e49e63555f95fa56b153-Supplemental-Conference.zip › GOT-10k-Results/VLT_SCAR/GOT-10k_Test_000074/GOT-10k_Test_000074_001.txt]

823.5	184.5	278.0	535.0
856.1664051715519	167.83224621606593	249.59383389100535	529.408863333759
864.7318929382758	170.87598521994352	232.46285835755756	523.3213853260038
862.5896445548364	167.8362086733431	225.06766374981413	517.7212470445822
865.5062328780648	168.8183163088674	219.2344871033572	515.7570317735336
809.591851872215	284.6450528869507	251.7060990785234	454.1545944099386
758.8758679665507	313.3238489109486	298.13295379149207	396.7970023619429
717.5675857832414	337.96757616986235	348.0010106726255	347.50954784411533
646.5233093542485	350.93711114973127	391.5132700508855	310.6175563866302
627.3809603400147	359.3687938867414	407.72033619074955	282.71537496830814
619.8856959755218	360.93619626069824	422.7108649197353	268.75221058124737
633.9580692384636	356.2310891073838	416.2091020574684	267.3409330560679
647.1934617245619	358.8952690425416	400.4388723494015	262.01257318575233
661.42567464879	358.6400855209897	371.9744465009451	272.89814995101904
674.9272822232635	365.50755179103373	344.971231351998	269.28868288937235
679.5327971756226	371.66513354525483	326.10519031677603	266.62853051143406
681.3870783748092	371.458308248649	313.0739941748042	267.04218110464575
684.7915193670317	374.0547955522926	297.1366173644908	261.8492064973586
694.4799814109349	383.74015099092725	260.1626128528167	277.6726564678246
706.7901258641936	377.07610027674536	235.54232394629935	282.53203338684557
712.9719081545601	375.4463179291721	223.17875936556624	277.64134086689234
716.1390690239234	378.76073451345985	216.84443762683975	271.01250769831677
716.7602835346477	379.5281046877754	215.60200860539118	269.4777673496857
713.1623015295638	392.8319549258917	222.79797261555893	288.633647596694
717.6988742371326	390.5987175042071	229.79950931776534	301.13746349873537
719.8588249490049	390.41730249413735	225.47960789402083	309.842615971079
720.4883295245761	385.9749033900413	224.22059874287845	310.32335497740377
739.1265081318338	361.9475368385689	254.06959411461912	299.6434045673744
755.149135798913	370.32982134374447	291.7243609768842	274.1663327824703
761.3531300224163	380.27696587673415	341.69051658611625	254.27204371649094
775.8684565183731	384.17217965443484	378.1795915393334	246.4816161610895
752.3136769404275	373.77140261119825	405.724402383452	237.9360477799035
777.4884517735295	375.08136291996595	405.6244339212818	235.31612716236813
785.2259785899648	375.56916154700684	400.15345377215164	234.34052990828633
853.6529199412626	377.1195142033879	421.8014061961277	231.23982459552434
1071.2947640152297	320.2159695484388	383.3061467963032	243.3062911494967
1234.3027340952601	220.25983416176436	420.11760110120406	217.67720860678838
1316.1959491439588	157.1305030664301	454.6655312047568	195.1851006467442
1294.115270748648	110.14105999773722	388.52064279950537	228.99694395001734
1364.0791788234078	83.72723302847888	335.3818375938555	272.1813744503263
1341.2601489619033	59.595376956715796	285.4701541829379	310.8901122804598
1228.5379513119847	34.0399818471123	248.01227113547634	343.22216833200264
1140.4309329179882	27.57112454380149	229.33479988429957	356.15988293862426
1081.3839654486278	27.124017273861483	209.93647274147256	347.88794667306774
1048.2913558539192	32.65703168602931	197.66670457911454	336.8219178487321
1014.4535078271681	44.686948040316736	198.5782300033551	304.41656381149954
1155.204566536182	192.50576607400652	224.2875777687297	260.84987353562946
1144.6402998745689	236.05868893468931	237.7815773896155	234.82029743298506
1119.159244045315	265.4593039206243	244.0886129446551	220.674143564583
1115.653577526158	272.67224607348413	243.7831698846508	213.56503535718232
1110.6382086610292	273.24003138160055	246.6155050371668	212.42946474094947
1115.2253949684787	275.06943497222824	244.66517370003385	208.77065755969403
1133.5918568940351	266.0581230397324	236.47275444755638	219.65815527502693
1136.834753192205	260.17969701679283	229.98696185121673	231.415007320906
1107.2367197199637	248.98431800290552	231.05371645626803	239.27343726382287
1095.039038150017	258.7965765566287	248.04263555241448	219.64892015637656
1071.4029520885545	288.73505654056646	287.9529803994401	196.58109656799888
1056.6055483923872	293.8058412154611	317.5477877917747	186.43952721820963
1040.6146799777007	305.0568645337744	349.52952462114774	179.67624540456723
1008.3708982639541	307.79869149114086	372.88741623664373	182.41852585223376
980.770434002467	329.8065842536176	385.01128279122156	190.09521468935588
938.6742048161805	336.34891094029774	397.7972924821165	194.8621734864152
882.6886969677845	366.94433819526597	408.6187388855289	198.0392267086293
844.5767704217142	365.4992452280804	409.57314754959043	200.92941264300046
858.8791382802442	362.1316436588889	371.49560338870276	207.66461578138342
842.7774481154623	364.7584763628135	340.4963744383287	211.43989455638243
851.0560455821105	371.8924325088472	323.93917950503226	214.4365873685405
856.3220811073829	385.9038701250811	313.4071084544875	211.71691709403245
868.9905791229128	393.07151869454395	304.5317405408506	213.8432480725295
869.7789598793493	396.78504499124216	302.95497902797774	214.54828938193202
859.2046910495603	394.0612938786877	291.62402291051626	219.99579160704099
855.3591084985154	390.12921057428355	283.24070752224196	227.85995821584925
856.5058551834161	388.036784769653	280.94721415244067	232.0448098251103
856.4498967764242	386.9607514977863	281.05913096642445	234.19687636884373
855.4811163062461	389.33481188393364	282.99669190678054	237.55462913255877
856.565608466635	392.9206158410528	280.82770758600276	238.57286721346247
856.1398948048618	396.9005893444501	281.67913490954925	238.78568716250186
855.2082496945471	397.4257226765723	275.35309035532003	237.73542049825744
851.8450249553043	396.0406454042561	282.0795398338057	240.5055750428899
851.0310159867968	381.60111998886555	283.7075577708207	252.9382785652553
852.0673678911905	372.4229571206969	281.6348539620333	262.8469623097376
848.1997760183256	371.1446396924258	280.79679718244563	265.4035971662797
841.8602479508004	375.0732544189251	293.475853317496	257.5463677132811
850.973081555236	419.73011142698476	318.61469750554147	228.9429696528453
844.7068523322955	426.77239659397225	348.335153562287	214.85839931887028
868.5673802972715	435.23848420984973	371.0676822114948	206.73292215951034
861.9790131709178	443.7414046013224	384.2444164642019	198.73382735614015
859.1660378629258	445.8315923291342	380.80655628371966	194.55345190051665
853.5423939877602	444.5539603801552	383.1125313340483	197.10871579847452
857.151720685287	445.91271593413524	393.9322795538061	194.39120469051457
856.4349784655892	439.8834895439697	404.4965041882998	197.31891727574757
851.9333435142141	438.2979227903093	404.16381871203714	200.49005078306834
831.862004735746	436.90050718004994	406.7621560115722	203.2848820035871
802.8600617509443	442.9178672738032	407.93105163669566	200.7226602068273
802.5535033062463	444.49927428224305	399.09895252571044	197.55984618994768
816.2838980363001	445.1482532623114	371.6381630656028	196.26188822981084
819.9635777635275	445.12786928462896	364.278803611148	196.30265618517578
822.4246019200438	448.26868167481257	359.35675529811556	198.74944199050861
827.03035624954	448.91582050204244	350.1452466391231	197.45516433604882
828.563210072428	450.4292929150354	347.07953899334717	194.428219510063
834.2688289857233	447.223703457987	335.66830116675646	200.83939842415964
827.6555075200881	442.3693743840597	323.74902001533394	210.54805657201422
830.6968071319451	442.3263318776575	317.66642079162006	210.63414158481874
828.3751262205575	441.29585625567995	330.58668050867686	204.4181949344923
823.3852744724974	449.76829455088273	348.9328819323316	195.8398162716212
820.7729773434239	453.52407066056475	354.15747619047846	196.82224949541356
826.4079780329109	451.62577577122573	351.47542471576503	200.61883927409153
854.1240252471375	449.8376509163775	339.10769296461785	204.19508898378797
891.4010436224577	465.20525966924225	323.9818748892146	207.41885357819396
929.8457568658284	487.2930712450476	313.63670534485027	213.15142313336608
937.6606753905925	485.6131397397095	306.26492653576156	216.51128614404234
