# Supplementary material
Source: ML conference proceedings conference paper supplement (https://proceedings.neurips.cc/paper_files/paper/2022/hash/1c8c87c36dc1e49e63555f95fa56b153-Abstract.html)
Supplement: Supplementary file 1 [file 1c8c87c36dc1e49e63555f95fa56b153-Supplemental-Conference.zip › GOT-10k-Results/VLT_SCAR/GOT-10k_Test_000074/GOT-10k_Test_000074_time.txt]

0.036182
0.022862
0.022784
0.022877
0.022705
0.022644
0.023299
0.023417
0.025292
0.025620
0.025697
0.025236
0.025725
0.025541
0.024788
0.023437
0.023738
0.022803
0.022774
0.022665
0.022967
0.021954
0.021245
0.022544
0.022428
0.022750
0.022602
0.022159
0.022654
0.023725
0.025845
0.025839
0.025805
0.025181
0.026194
0.027718
0.025737
0.026035
0.026969
0.027176
0.027405
0.028145
0.028565
0.027302
0.026847
0.025610
0.025455
0.025618
0.024548
0.023782
0.023320
0.022988
0.023748
0.023184
0.022617
0.022459
0.022967
0.023316
0.024287
0.025017
0.024824
0.024263
0.024273
0.024381
0.024194
0.023321
0.023271
0.023010
0.023210
0.023238
0.023340
0.022658
0.022894
0.023032
0.022908
0.022899
0.023411
0.023701
0.022954
0.022386
0.022888
0.023397
0.023484
0.023172
0.023880
0.024544
0.024737
0.025295
0.025230
0.025632
0.025514
0.026729
0.025999
0.025667
0.025671
0.025694
0.025831
0.025296
0.025680
0.025373
0.025049
0.025598
0.026384
0.025743
0.026085
0.025396
0.025277
0.026689
0.026523
0.025241
0.025060
