# Supplementary material
Source: ML conference proceedings conference paper supplement (https://proceedings.neurips.cc/paper_files/paper/2022/hash/1c8c87c36dc1e49e63555f95fa56b153-Abstract.html)
Supplement: Supplementary file 1 [file 1c8c87c36dc1e49e63555f95fa56b153-Supplemental-Conference.zip › GOT-10k-Results/VLT_SCAR/GOT-10k_Test_000075/GOT-10k_Test_000075_001.txt]

978.5	239.5	372.0	288.0
972.3851764880256	234.9202902508347	362.4843783408889	296.1594194983306
947.4849445220558	220.80291175393614	339.7705295166358	314.0349889555288
956.1155146717944	194.4415909757556	312.21523364690916	335.87516380114147
961.0063176810761	191.30164089273538	292.2291800867698	342.1550639671819
957.9536757752597	193.36505261376817	258.40420188666826	338.0282405251163
966.5921540860618	228.1277921041736	231.7555566390007	324.7328933006872
939.9811161064474	230.0079407470287	223.84688236786894	320.972596014977
904.6183227509907	232.9414184884381	234.7526935933189	315.1056405321582
902.3241408693598	236.30980911092362	239.34105735658056	325.64094065938144
871.5474028055389	230.5325750402783	256.5376971803682	337.1954088006721
838.0356828313284	201.84096238487143	248.9328700956603	357.2645005949213
773.4591371063109	188.46376412219996	235.46251973396778	374.51066766614906
772.8622139409613	190.98612377696762	227.11308896060825	388.5525025647318
764.5324471393872	232.22660370680757	224.54896627719666	373.35433970801046
741.1108387966347	236.21590588911494	224.67911727407517	365.3757353433957
705.8417109368934	238.07472123218383	221.4099697118945	370.8840300674658
673.1309918100767	234.4700719433418	222.06103256726158	378.0933286451499
635.7578234332663	258.53793000656225	221.83893323663983	404.9260486029517
613.6175633399531	369.35137937425566	217.29711931084793	398.11741996220525
615.821026585402	521.8147480679379	212.89019281995002	390.3695056871702
604.6529909819217	523.5616260524924	225.82945787640242	386.8757497180611
599.0439177265715	521.1061503325617	237.04760438710264	410.9171229194883
597.7199147054132	579.4733821525432	239.69561042941922	405.41369008349284
658.1789826655754	625.7016900789891	269.9032743955224	383.48244751093375
663.4039714384173	576.4562310550444	290.2050961493645	399.9685674267537
660.6315508272278	524.1997024841548	295.7499373717437	428.64041226850804
638.3083868425022	514.8896231246545	317.6770041267665	447.26057098750886
571.1118143665865	531.7479159709128	368.049354430619	425.54695595898886
542.1007258171662	543.7102749007502	426.0715315294598	401.62223809931413
479.3432785365766	494.2140764253133	473.3876712650274	396.34962861603924
430.85415051263703	468.81066030698736	488.26665985961375	406.1068271260448
460.84563183474165	416.4326648603336	498.63248129165413	412.37452031260295
499.80427311009464	413.77668739918795	521.0285632354523	417.6864752348943
578.7005229744088	409.14994147440194	569.8830872695344	412.1794653871299
554.8302566224862	362.23077577548145	602.2080003265853	398.10845925741114
467.53030387824117	246.72427271335897	635.7704770378757	378.38825866663433
465.04211243244754	201.09891867349918	640.746859929463	358.7456826208864
360.60821573327775	325.4044966298926	600.2925919538023	375.0392169179747
402.1822015433518	445.31719830813705	578.1718447464897	364.06590510961917
434.0701799836668	461.19753236898254	573.3651193168744	347.0475448506819
546.8974805409564	457.9090281435557	505.9425053230159	353.62455330153557
621.0097230255774	450.62262708105584	452.10078515451596	354.71410331214355
696.720085994812	445.0920561465532	402.1407413192331	353.0926599182505
714.5572806570264	431.42611585784795	366.4663519948045	344.7630386573825
720.952998884497	427.45279409099635	342.47575647385594	341.51052312507846
722.5631080696528	422.3614168345548	328.4841033108958	340.921842845313
719.0331979831401	416.78326332663835	325.00255248436804	341.5367788615929
714.9338470599141	416.48209830381785	322.7053793589894	342.1391089072339
720.9556048435204	414.9615732738779	310.6618637917768	345.1801589671138
743.9258881198825	408.3914512829416	285.3705850326319	347.9957590521967
777.8375601832229	390.32049191345703	267.3576227352036	354.2514486936144
772.6301916057541	353.42323088461904	258.24200186276596	379.2200756828521
750.458575808595	355.91983106492813	272.60480794815624	384.2203504918765
710.9345435661941	365.92814798126216	289.81507867871886	384.81631457728815
706.6810762289566	360.6882501582109	298.3220133531938	395.29611022339066
702.6782147414314	355.26791792953685	306.3277363282443	406.13677468073877
714.2462667760376	359.128113704785	305.5763435329427	409.6087387671979
730.8624312642494	359.33839498814655	306.04280084698996	409.1881762004748
463.8173823537425	403.53663951677436	323.36151329381016	410.6649715561225
445.5593633877906	433.894127321481	325.2605098571295	407.64506489434996
446.25864418973623	435.18088426505403	323.8619482532382	405.0715510072039
452.68352473046036	427.54357447023585	311.0121871717899	420.3461705968402
455.60816926680326	405.4697414707765	305.16289809910415	441.52336750520544
460.7482294463662	379.4852199858162	294.8827777399782	458.36326241440054
770.9026709281081	355.9265670341713	334.9310006132047	411.143838912446
798.6686260768787	367.99293832987325	361.5362133667584	375.2772215994571
481.343399316958	413.27895146250086	369.6324038915187	400.7337625555132
464.3112786651273	410.5293642796381	403.69664519518017	418.3622156104229
457.00090166601814	395.44409099015957	431.2626929862025	448.53276218938
457.91934649133145	392.6913370508772	443.2801825245058	481.74702844580446
462.19657737779187	372.3746323676431	449.2899291927794	507.8162293710783
461.12973005754696	361.13945044026275	451.4236238332693	515.221101899421
452.1117130045554	371.9430138755881	484.67411875868004	493.6139750287703
393.6578577901412	365.1751773445288	524.5520747082398	476.3377462991815
449.7473699740376	362.8176400504127	538.4328247705914	465.29534908364553
471.5592982984308	365.58200990426576	542.1977145733654	459.7666093759394
444.1103032099047	367.9991938523714	549.7988731291423	454.9322414797282
358.05649627330877	367.28849655460385	548.0526428565815	456.35363607526324
422.56503974586576	362.2316599295765	529.6420880467367	466.46730932531796
428.32327457489134	353.28012577370936	502.4467452975173	484.37037763705223
446.2660853602779	333.51460379514344	482.10089903451535	508.3616462864129
460.7565371346571	258.07071532656784	468.71646017967043	518.8812409783424
763.8435695913978	223.04762883594057	468.9028097025787	464.5457904854657
827.9389123810538	240.9638972632497	473.01156542167826	428.7132536308475
561.967757194666	230.54443991019147	422.9135161995658	449.5521683369639
561.0109546176571	221.7868814222009	411.0891054453314	480.80530122119706
837.622774541007	305.9377766117588	433.29430793588466	424.7823093469111
960.7899483848456	222.6481997393302	484.2426905597838	388.66869242478435
538.0376001469892	241.39402306476848	478.7340528286046	433.5331748907038
539.3286185616503	240.4624836500389	476.15201599928247	464.12026108938016
539.3592865879028	236.97208107523457	490.8978143097754	485.90820060198706
525.713587414531	311.155621970202	518.189212656519	460.6028925420241
470.09120736347955	321.5136262244799	536.9897042047293	439.8868840334684
437.2814849862861	319.37419387310143	541.1496640010747	444.1657487362253
425.5109839946308	317.43665749302204	549.1926906796916	448.0408214963841
466.24891525170557	326.6346789263556	561.8223565862214	445.3290333664968
484.6192136833986	290.042092028779	556.7499703520541	471.0118912178217
536.6245555510325	109.44784791397393	565.9372694561788	444.093009712372
590.0705820481521	59.71558268974181	601.9384688762235	416.5413157925835
665.7688690918237	67.8993440364377	626.2391707325194	400.1737930991917
