# Supplementary material
Source: ML conference proceedings conference paper supplement (https://proceedings.neurips.cc/paper_files/paper/2022/hash/1c8c87c36dc1e49e63555f95fa56b153-Abstract.html)
Supplement: Supplementary file 1 [file 1c8c87c36dc1e49e63555f95fa56b153-Supplemental-Conference.zip › GOT-10k-Results/VLT_SCAR/GOT-10k_Test_000076/GOT-10k_Test_000076_001.txt]

380.5	0.5	452.0	446.0
347.9617135450314	-6.2144042860099376	459.50995943906094	444.2871552043008
326.6319184826332	-6.668306706243868	473.7045081764877	445.19496004476866
316.4802815400586	-11.145717351465521	479.53866560033043	439.6806648739057
287.1253503890596	-19.209838197616023	480.35855806344756	426.86392164676624
295.31243985045495	-30.828931307044883	463.98437914065687	407.25983527592314
305.27137705058954	-22.329879960526085	444.06650474038764	390.26173258288554
307.68929784676715	-16.982024362147598	439.2306631480325	379.56602138612857
268.1269773109806	-19.851121273331188	441.0400560126884	385.30421520849575
274.5312837906016	-17.936921172196463	441.2373363421624	381.4758150062263
270.8319263288306	-17.64043255488204	435.6884868412407	380.88283777159745
267.28768843896506	-17.113378836037555	429.9248146263559	379.8287303339085
236.8556028901042	-16.660864373126998	427.0593756694052	378.92370140808737
238.19620611788645	-16.404388257092705	411.69118265526254	378.4107491760188
240.96684432694593	-18.403494958454104	393.7101159401724	369.96917228177034
247.17451785263717	-22.1132409795014	381.2947688887899	365.3636717793347
181.95289763735167	-29.148281153926177	370.64523133334944	367.67602062935
108.11276089915657	-47.11185632086696	355.54634526799623	333.8406740167701
106.50785125300129	-34.44005223840921	347.9010214525014	308.4970658518546
118.66473258234387	-22.96858611554572	333.91957911518665	326.88341489160933
130.56399666359746	-23.792078344957275	320.5272498328963	338.93659823064934
166.80057162180577	-1.3350592352143735	310.35957453374215	356.32803462842594
172.28234184711658	-8.945479652571237	309.88881042471985	361.05609912154034
314.55495167777786	180.4356094144212	342.09491523144254	330.7203779024052
204.70996015065015	20.156601187739966	307.5015890718471	354.614533606275
305.29637023084814	190.11168635081737	335.5781056275115	316.8966707694725
301.1833857778921	204.7918537352018	354.0782148942667	287.5363360007036
293.68716603621164	235.26919351854903	369.07065437762765	277.0345176545089
272.7953704078442	198.64877044291518	370.2580694159047	279.23205542347523
257.4341563067004	230.47005552742513	370.37135584522736	276.8077688003848
250.26649134687273	233.4782681580695	384.70668576488276	280.9564787023181
197.49580731202377	195.33526548274	396.18901502066365	294.5364581770324
196.96410323716347	233.09497056666694	418.94857866490275	294.9535922399934
153.54725093313925	222.22572837652092	427.38172678831086	294.29191762467394
151.92256621852664	218.7627874613937	407.99805461403207	289.9012786531763
157.57015143268006	241.15230048120597	385.7517528225744	288.9267780661549
180.13751241749134	249.0464479739692	383.0069103408724	283.73595295260856
186.486808939786	259.84935726464784	370.3083172962831	272.60088629244467
215.76196191981944	269.08043128251524	331.94857372041054	274.3293006409042
354.8775471181341	289.18217597542184	368.435018563176	253.1996061180846
351.45110967247547	298.42933533940624	394.7826539857588	234.7052873901158
449.35125211777097	385.4701900335689	444.80079165132975	198.2818946332414
333.5242409529881	351.3856764155474	457.78534377224094	196.87427225743977
339.0042296977317	318.13846770707966	456.9281987823522	192.64886217718592
321.21889829155793	348.9939009342421	452.4361930383024	181.01633141835765
290.64265177241003	384.8129867207405	445.38061678222437	158.09820934134197
295.8934738999443	386.6467911654422	434.87897252715584	145.20013257917978
312.4079260766946	386.43603525296874	419.5415867658339	136.7758851080374
312.2958626135513	376.6012453702075	402.8191921251207	139.49894330656008
318.969336461993	396.6420417438074	397.7571844432165	140.8420506342558
290.23063799927127	388.31452998965256	389.3377371329571	132.78575755417677
367.85434900968886	294.97859124687807	377.55761448358373	152.07911910635363
444.20937381261274	376.961404653047	420.43763461524173	126.65645835808238
256.2801934324714	315.51380595935575	406.22871844556175	133.36140304292275
237.04165473406658	309.5734820513553	403.59895713735295	128.79931537691633
200.6049490698436	289.5154830349273	403.57053779069645	128.4142963680488
171.7063501023764	265.4997572395514	404.7187455240926	127.88947064319626
150.28254201065178	260.7144306158881	390.8709722089348	137.460123890523
125.80392306244218	266.9014866165987	383.28664781368803	133.1633779307683
88.0547314208647	271.48356180398196	387.7659528317714	123.99922755600176
230.85761079318286	303.5481096269259	405.85651497762706	114.37972796738163
85.56892477095738	259.1201647379376	373.98295230867564	140.31836219152365
57.3810042730679	225.73725440069677	351.4839389191742	143.98429935778108
47.08040170640501	226.19713598980815	333.9367972885768	143.06453617955836
23.78034735564009	238.64788590362713	329.0172777798058	140.24287701347785
34.07788488066518	211.38308594892095	315.661094207368	144.10023657960312
161.39255679944506	232.9823979913529	317.1069311036749	143.58080928371692
135.22808511404224	227.5951876364869	319.56018324550666	132.97993375246003
192.12520334729595	219.6346633819651	289.44845744182896	141.92743970626788
221.93525011513356	197.66794861468603	276.68129322713	145.7012155371321
204.7909548599902	206.35523365547894	278.11362104816914	148.0404030690948
174.9307203245802	189.3386698860989	278.1418277991787	162.1761098345847
77.55385798511901	155.30852740187677	266.68285989206004	175.24634344675138
79.015223625873	161.5699507852724	256.83795491171213	169.64567037880005
56.3444051059154	181.519526234642	268.7741175832241	156.47089897478338
58.3344821700791	163.9083471117845	258.1558306068854	165.14072582845304
65.91100689422166	188.03168828461003	262.8799737141809	156.64842859396325
123.5148682719963	244.38934820279758	304.95818607308627	129.12965694458444
106.5995032783826	273.87649470795424	352.17764525160237	110.32155150813703
168.52868028080238	273.05366057928904	347.8306377405716	111.96721976546742
173.16806202279355	278.0395822556832	345.5505620654076	129.99012764795253
196.52818030766596	266.6277734565269	335.3000577220176	152.81374524626506
149.16633194680813	245.91615782931262	354.51037994941186	148.92895180410073
135.84087195405152	240.76169860508546	357.8778097051004	151.4767068426135
135.92718337206503	230.05029966544052	365.5601507448307	157.18957697038883
288.4515950711834	252.64085666454864	367.0620183227491	168.4783270993591
153.01621277920214	253.0453174918356	356.15831690657	159.3819211506634
188.08165629841994	258.57200259980584	309.93599925840795	172.2371203249965
218.20591563507622	287.966042341732	294.7802967064034	173.57279566955495
222.9174341290106	313.8142160033728	299.9845211860237	165.75823274874054
251.25250274092073	291.45187998905584	279.60429845581876	174.19299028375906
212.39880682629158	267.47340196291316	265.03703836271774	172.46359530092786
185.03330627763074	237.28618824163223	251.25698111609506	178.02917606833427
168.79531680639667	218.64801114466428	256.78984801539696	168.15508418672925
187.6843703658842	222.41292423022452	252.28951182868468	160.62525801560878
198.09688008168212	223.21288234002492	244.38932017987747	159.02534179600798
197.65347719701398	224.0143625420014	232.64146792192474	157.422381392055
119.64327512051841	200.6631359965864	217.46657405441937	161.32600997776092
278.74616149490214	251.319127952698	226.44677902409506	155.1954014018121
374.057918824939	327.3546734314556	245.25871247006205	134.7694492538082
394.6118248503754	322.5115754813279	269.28324623423885	138.53452280724093
