# Supplementary material
Source: ML conference proceedings conference paper supplement (https://proceedings.neurips.cc/paper_files/paper/2022/hash/1c8c87c36dc1e49e63555f95fa56b153-Abstract.html)
Supplement: Supplementary file 1 [file 1c8c87c36dc1e49e63555f95fa56b153-Supplemental-Conference.zip › GOT-10k-Results/VLT_SCAR/GOT-10k_Test_000077/GOT-10k_Test_000077_001.txt]

710.5	239.5	37.0	107.0
681.663471095371	240.83264938611788	40.879943653851164	103.33470122776424
652.3620743823402	239.6029458712054	48.48678845056593	103.5768930997915
630.4559546770024	239.1811571648854	49.90744128848853	104.42047051243148
597.9094701824611	239.19484818169633	50.41220146075934	104.39308847880963
554.2343802866015	238.84621017365808	51.34297661314016	105.09036449488615
517.5580410168027	238.6719832954556	49.461956488204386	105.43881825129114
489.6073505950585	238.3677896421712	47.78176950563733	106.04720555785994
461.8991317812666	238.40315965768352	48.488939039893665	105.9764655268353
439.72914640274996	239.15186046316649	52.19825529990615	106.86910241569407
411.0714502548065	238.99321086324875	52.755810266982806	107.1864016155296
382.9478831262472	240.11826858891504	51.91594210893527	107.41832974746511
344.2617039202358	240.38765801070528	52.69196129671293	106.87955090388466
306.89890971300554	242.40159500156267	55.600510702420536	105.32812654316139
270.06169089678895	241.86444909732666	54.158595151690136	106.40241835163337
237.53287926797896	241.45686507344527	49.360911363074365	107.21758639939618
206.11869619446196	243.49215732082433	46.7587111874963	105.570356212883
176.6509373775313	245.0061753714301	51.55771631914129	104.89608152481134
146.52305474427635	246.2362320389568	55.9745446244026	104.86374805763832
124.27355153443654	247.49253126951817	57.91468966449666	104.85461203060888
110.15371421994361	249.00335185945244	50.643236715548454	104.36947996344995
121.20617153156701	250.3961748773921	47.77200203157287	103.9880439199796
125.37486956143364	250.6795916797576	41.78317822038255	103.42121031524857
133.78799125977253	252.3305845458297	42.83360861955787	102.35380880758598
137.92759057804142	252.98923347537988	43.505882019509144	103.27437895760798
142.60557059327644	253.4072069654685	43.202260176428354	104.70151652427796
150.6431371108552	254.0056756407078	45.35352081832721	105.78287838343137
159.36043251585508	253.88935458432886	41.911250839575175	106.01552049618925
165.57977085980258	253.1460622917519	45.392070040691074	107.50210508134319
170.04584331186405	254.02195677722645	52.9630696070796	108.10790817761
168.86906627268195	254.683518723955	55.31662368544381	106.78478428415292
178.71017050627736	256.6736427703326	50.756842823301895	105.32494079223918
190.4670771006301	257.9244312593082	46.60410971738875	105.243498824637
202.59400558790838	257.72339590522887	41.12065981711266	105.64556953279566
221.59785721529758	260.2506217683469	41.44362628816414	102.84586308454958
244.5449021734548	262.89603319462043	42.17464694758208	101.9955269535009
272.316999902308	268.3779809038131	44.37638834409361	99.91562182037976
321.4118055338111	269.3273507869758	46.52941159270911	98.0168820540544
379.536668248118	270.1853688905216	53.475647381387056	96.3008458469628
442.22929613882394	269.11245976013134	54.151035445501435	96.11220774023353
481.36920550201256	265.6444240325314	53.19584032293881	98.36193837095979
499.4452351813962	264.1114837346371	52.44515748155972	99.06772719892255
500.3749281064755	264.0352380529381	50.58577163140099	99.2202185623205
502.11561172851157	263.7111312322187	49.43226534932914	99.86843220375931
522.5436517219391	265.703459183941	50.28956062086742	98.2011860368921
559.1122773472466	264.89912329129663	51.00207430836579	99.80985782218082
582.7545403172596	263.0950996942857	48.24767063731388	101.07421437046717
577.7521712908042	257.48837614408546	46.68018646696771	105.34432813691345
573.7567409296344	260.8380276013927	47.62374161706504	103.34322893712712
558.2458134634317	267.39933264413514	64.62600058352885	97.2304168346131
581.1190573052443	269.98764207333875	82.27846721819853	94.58975614893771
621.9443663465706	269.3845248191685	86.92065580567589	95.79599065727811
650.4470425079492	269.31105358435747	73.06398443328024	95.94293312690027
666.5235766148044	267.88583764007615	54.18802838843246	98.79336501546291
699.0100821723701	267.08382204079965	53.56726153807517	100.39739621401586
706.76595219246	266.7019328323318	47.641269585111885	101.16117463095156
709.4893404710926	269.19295391697324	42.19449302784648	100.78941512939016
696.8091622203596	269.2141848932531	49.92332904011305	100.74695317683035
685.6604010607484	269.7174260033023	53.510695264006586	104.41800998056425
697.7209114631985	269.2425823701632	46.57153299958243	105.36769724684245
715.9105949761122	267.6532799283809	43.05756202883265	108.54630213040696
752.9445191053435	266.1791589474973	43.58522295887509	109.16343443003346
796.620475809539	267.4604712344971	45.511102706474865	108.95022546540199
840.0298618443022	267.07451149712483	44.39463732401026	107.34152530995043
879.3656480817559	266.1926120848525	47.538255884159895	106.76774724777903
904.8858420515878	264.1191613019258	48.96439540978393	108.52980665611935
914.9580495119582	262.2012842658185	48.30376750054297	109.93008735189657
937.1825449830643	256.5284128765446	42.96147513343726	111.4991554866676
947.0182743002007	256.2216528376407	39.892825742704005	112.11267556447544
946.2767102692391	257.33541932919763	36.72542963639383	109.88514258136166
940.4410039829174	257.5567668858044	37.21779892894671	109.44244746814812
941.3073744502691	257.22190599260733	35.485057994243405	110.11216925454217
940.0524631017805	257.06355947959537	35.77858646237475	110.42886228056612
940.199061748199	253.36350926415093	35.48538916953777	111.15040340569041
938.7850206346902	252.41555991612358	36.08242731175821	110.81525801694806
937.0095773012799	247.70244086597484	37.396057871565404	111.29247168919105
936.3186951944111	247.78711808438104	38.77782208530289	111.12311725237866
934.9050899853461	248.1819197526156	39.31414956683278	110.33351391590952
934.51846209612	248.66688723047903	40.08740534528516	109.36357896018266
913.7858604898067	247.62622892631154	44.92103294256185	109.15542209255835
876.983216859166	247.3974390244957	54.45261152394352	109.61300189619004
823.6359388563478	247.726006091075	61.81642730247245	108.95586776303145
761.010371572185	247.68574741140236	67.20602476322722	106.37279540887518
699.2739940019374	247.1250397934789	65.73946868993623	107.49421064472209
637.8783690774493	245.32678923282486	61.245057334408784	108.38250620848751
575.8788034304978	243.44785857877477	52.97472568842545	109.49497825778992
527.502320888692	243.6617819791908	51.464254421007354	109.06713145695782
496.7923542764913	243.64292064532614	45.734305496609934	109.10485412468717
485.61660985354916	243.699363409073	44.21767509898664	108.99196859719346
485.32245422707774	243.6361083565419	44.80598635192955	109.1184787022556
491.66588030850994	242.39850963814706	48.71278589500049	109.22315446676888
471.37247763256767	242.20623369389142	52.682838671913856	109.60770635528016
450.45341561305366	242.5528401389258	54.26264749454208	108.91449346521136
449.5494624101425	242.75901664846077	53.537123221184004	108.50214044614145
449.7719987578763	242.46077060897028	53.09205052571639	109.09863252512241
448.9601100658732	241.73814837249984	54.71582790972267	110.5438769980633
448.4012785077433	242.2244433884727	55.83349102598237	109.57128696611753
447.32526417920366	245.1571566184317	57.98551968306177	103.70586050619951
443.5322112744711	249.83679691650383	55.48865098117163	99.38806716573288
443.4274510168435	247.78432773699024	55.69817149642677	101.07862078390268
435.0992432307115	247.3637916337188	55.254068767379785	101.91969299044557
425.78953397590016	245.39643643556352	51.84372552219649	103.40665208066655
421.7991084544615	243.19517667590114	45.35893292649956	105.39823099356234
421.29958292002266	244.87707241656435	46.35798399537711	102.0344395122359
418.39697140481974	246.87162247531256	49.86780815929255	100.34073826122994
409.1451728762167	248.69454712337682	54.380218943773244	99.02675334388901
431.3113547527927	246.28798204660083	45.899999705307586	99.05959756214945
389.6970757003624	247.3216236979058	43.85181424028748	96.99231425953948
384.0563323438578	244.407145972284	37.70776585990804	102.82126971078311
375.70635899081344	242.9350389473844	37.18493830466549	105.7654837605823
364.86427126865675	244.42260355822117	41.38542234383722	104.97581596455143
358.3914683889326	246.40614033229946	49.83131337749367	103.25859977929086
365.25345198408576	248.29636782703216	50.35060711074628	101.85202161041863
376.8597240941715	248.46537077497538	43.67442973351973	101.5140157145322
412.6029754724364	248.14799472346357	39.40637944199786	102.14876781755584
431.2962083251548	247.270995847346	38.97421095890351	103.90276556979094
433.42128355007833	242.51036783160757	41.29759728349385	106.85048482683051
447.7449110617123	243.07171652247655	44.50350510944534	108.00301336289395
449.5997847912201	239.85040688282595	45.491867260006636	112.09657783740673
459.27706728208824	240.52826120760213	45.542587192147735	110.74086918785434
458.1945841951533	242.42496577987754	47.707553366017606	109.35447928794301
469.4574564598098	243.88268616820022	44.584363769504684	106.43903851129767
513.2780405472994	245.10706946517453	45.404058764794954	103.99027191734903
575.4760763329797	246.46599215835508	45.58581715703177	101.27242653098794
641.7425998987756	243.95413953955003	44.75811023978051	101.7545683129311
693.5968546947724	245.92714060951172	45.1576375559423	97.80856617300772
744.4269882236642	239.2458555084352	45.29250733634737	102.31938534575299
781.7636470576354	243.64659621648596	43.605301201216285	102.64116787125289
789.3606609279757	249.04786204061327	41.945439646963735	96.35002495180765
789.3298705148557	247.5995745605162	39.87168549281648	99.24659991200181
