# Supplementary material
Source: ML conference proceedings conference paper supplement (https://proceedings.neurips.cc/paper_files/paper/2022/hash/1c8c87c36dc1e49e63555f95fa56b153-Abstract.html)
Supplement: Supplementary file 1 [file 1c8c87c36dc1e49e63555f95fa56b153-Supplemental-Conference.zip › GOT-10k-Results/VLT_SCAR/GOT-10k_Test_000077/GOT-10k_Test_000077_time.txt]

0.018728
0.018477
0.018368
0.018612
0.018634
0.018618
0.018527
0.018437
0.018354
0.018362
0.018453
0.018613
0.018629
0.018487
0.018455
0.018977
0.018677
0.018688
0.018272
0.018390
0.018754
0.018975
0.018762
0.018360
0.018308
0.018441
0.018603
0.018711
0.018413
0.018348
0.018374
0.018283
0.018378
0.018458
0.018498
0.018362
0.018497
0.018458
0.018424
0.018418
0.018364
0.018315
0.018362
0.018305
0.018301
0.018362
0.018393
0.018501
0.018505
0.018483
0.018218
0.018375
0.018330
0.018298
0.018348
0.018670
0.018707
0.018254
0.018320
0.018335
0.018319
0.018278
0.018325
0.018715
0.018854
0.018450
0.018342
0.018484
0.018311
0.018390
0.018501
0.018536
0.018276
0.018289
0.018415
0.018328
0.018411
0.018495
0.018649
0.018169
0.018248
0.018284
0.018355
0.018373
0.018192
0.018285
0.018216
0.018215
0.018223
0.018319
0.018296
0.018426
0.018476
0.018442
0.018331
0.018361
0.018336
0.018408
0.018493
0.018924
0.019323
0.018894
0.018787
0.018471
0.018436
0.018321
0.018727
0.018722
0.018614
0.018392
0.018338
0.018313
0.018341
0.018400
0.018438
0.018613
0.018314
0.018395
0.018325
0.018532
0.018457
0.018528
0.018495
0.018230
0.018485
0.018372
0.018366
0.018371
0.018326
0.018320
