# Supplementary material
Source: ML conference proceedings conference paper supplement (https://proceedings.neurips.cc/paper_files/paper/2022/hash/1c8c87c36dc1e49e63555f95fa56b153-Abstract.html)
Supplement: Supplementary file 1 [file 1c8c87c36dc1e49e63555f95fa56b153-Supplemental-Conference.zip › GOT-10k-Results/VLT_SCAR/GOT-10k_Test_000078/GOT-10k_Test_000078_001.txt]

599.5	212.5	47.0	89.0
564.2098147273148	215.9910499386452	50.9829571356841	87.36603690429213
539.0268821656356	220.91062122109042	49.51344295048676	86.16612422416098
513.9494531052311	228.96940568569596	48.85777115344492	86.98539860090011
492.0829456402827	237.9689847354077	41.75657910076874	85.93097616233428
467.6690072403358	247.15311167248876	45.032596370700276	83.40684734207204
439.4602863556039	253.033530724321	51.45074352544393	85.64581173052918
407.94328657586277	258.30000199440514	48.07822894903581	87.96574289408159
378.91202829074973	260.8545366049914	44.68167303807428	95.57234384143072
345.7746356265094	268.77374958211175	43.62225310124054	97.1104869879163
312.2228711963006	286.5958939510963	43.273581266227566	94.10435987676843
276.4367191343036	295.482971305943	46.81111064433383	93.33889885354685
240.70619507370154	300.2379441042921	50.80165799720025	101.24069539061315
211.6607220864787	312.9496820235413	49.8626183741368	104.1516126389192
193.21170200674703	321.8511816516387	43.786495633726105	105.44824133822411
202.44906215962988	251.49940015619035	46.006855356064484	101.28624413239194
203.22765074764825	252.45772752923932	46.728049064191914	99.36958938629401
203.06616974558867	259.11079972868066	44.7879067790706	99.64207072285419
204.08904836235936	261.141861734809	42.742149545529244	102.27924819525053
207.40217696488742	266.5365292413686	42.82139885278957	104.90092620676417
208.9548454690945	267.5946397069343	44.26486305215829	105.05910587952424
212.87986151595325	268.67044648038654	41.01947164051852	107.51213301469755
220.0435216139278	272.4562315615092	40.370542830945965	106.77975854564039
218.23551848307304	272.2424325996586	43.986549092655494	109.4649160290854
218.52693663333832	276.5352218187101	45.764630972685694	110.32301031322562
227.64693110605307	285.97683915339616	44.35919840942903	105.86939540000166
224.80573709846593	290.9494863983275	50.04158642460335	105.18688994576274
235.8894289738615	294.77967790667265	47.119561602811515	107.14918639357225
241.94932053148088	303.0745714695403	44.5317917930018	104.8574192259804
246.00152757501462	304.45274346731264	43.339778212157654	104.40520873251009
252.36192958616581	307.7380093129608	48.83070897764634	104.66407758663553
262.1298922919463	300.35188258452933	48.310189098293115	112.30555396892055
273.9037107996217	299.73458529638594	52.028036353888965	118.49750932174317
284.26679162559725	302.0095805203015	47.105547309029134	121.8493551774576
342.3509922931585	270.4548946418309	45.10837305317406	107.11470847126182
340.7143352450741	263.83416237006696	43.68775182322994	101.58043171033773
335.65081531123855	262.56845006841684	44.847545710031255	95.14461033276814
333.5899995199387	263.3311447688744	46.800440917294665	89.28174818118042
326.44829789336774	262.66550116190444	44.1497625153004	90.61303539512036
318.5329634609529	247.95917849808663	45.34709616502942	99.120916129755
309.2758193738748	240.42075048376634	45.978675006767745	107.49175615873895
298.9712737543757	232.3680671860089	47.64516003053389	109.3901680928299
272.8531545767436	223.53134657397786	51.386683265263784	112.51519478073163
241.61239545442007	213.2390289594315	55.54350952437157	115.3488367968342
212.75861565342638	213.60575419057128	54.9577102794196	114.61538633455467
189.5733091027074	212.7661840019282	51.381077451210786	116.2945267118408
163.75797210900237	211.34722379409226	51.19936914045425	121.72306624242108
142.8446659772415	218.85736453148058	53.03645023474632	120.032628490721
126.24187286270373	223.7561123547547	56.828503903897285	115.58304785506809
111.2919594645235	231.38775415089282	59.97395041291672	119.04783046393058
97.91239804171607	241.5581919248579	58.927040586346166	115.39057451931171
68.55633714291614	244.35094490007106	58.04297321915878	112.51398625819388
38.213522305914495	252.9673783404748	57.74478857692503	116.49288087868625
4.866752184660321	263.8488029454986	59.527288465645725	116.36704511990109
-8.950892970213516	278.5084264665102	43.42507972164421	111.65014129561195
-7.671916302169421	276.76380771585866	38.484815136748566	119.90400129452992
-9.112296528822279	230.52749511290176	36.54454305366262	123.1875245771981
-8.047168734368084	147.01330009801626	34.41428746475423	127.9965856989761
-2.726202590148782	113.64267785604021	28.6707656362778	135.95690466338218
-3.5375525087252644	152.5562013417088	30.293465473430764	134.11297216359424
4.708693976155821	113.45611457903308	48.193863641831925	114.04774243705043
-2.936524929267968	116.09276500568151	40.967972272615	116.27988464377506
-6.585488088900155	105.33704041945937	31.43585011961263	125.76987062174308
-6.618481169393279	118.96254480530217	31.50183628059888	122.13508778777502
-5.450761133674474	130.52676558053554	29.16639620916127	119.81317130675038
36.61929189039014	122.43684451170111	34.423418573383316	109.1738749207139
28.92949859535732	132.7630215152053	34.51897083936843	103.80555523778602
22.37109283266521	138.79819726477632	32.873379706155696	106.49760639724096
24.58140956259681	146.32657908559207	32.68649432655022	108.37583507664036
48.520903936004814	152.10483754745752	36.16788050068323	101.09934939632187
0.3477383003677659	191.19222184237748	31.697077129905594	106.9388596748584
-4.241847779091062	247.56436879198526	30.36964716626763	113.96982997277686
-4.298948517312493	241.234131971158	30.48384864271049	115.75200474947205
-3.486607410992896	225.1778249813848	28.859166430071298	121.43003164983168
56.68090277103074	158.8598065279084	45.879115173085935	105.45249542455349
-3.471849883498873	109.01218441461413	37.67414260252183	114.02212806377281
-3.1625368130958442	123.07573271215344	34.74347669460631	118.26358820822674
-2.9901448086180125	58.12616317089095	29.76253430137708	127.62260929963912
40.91138642589839	145.4194235881412	47.96521205164372	108.51117412011115
-1.4396062577155249	115.09034551667595	38.379292101031055	118.39891970728135
