# Supplementary material
Source: ML conference proceedings conference paper supplement (https://proceedings.neurips.cc/paper_files/paper/2022/hash/1c8c87c36dc1e49e63555f95fa56b153-Abstract.html)
Supplement: Supplementary file 1 [file 1c8c87c36dc1e49e63555f95fa56b153-Supplemental-Conference.zip › GOT-10k-Results/VLT_SCAR/GOT-10k_Test_000079/GOT-10k_Test_000079_001.txt]

722.5	33.5	32.0	81.0
721.6862543454778	32.52731608750453	32.627491309044544	83.68256557876339
727.0469499853372	31.90230121513799	30.841069508289614	77.78461974032543
741.0678514794029	32.00984628007134	27.85269015503029	85.92067082208277
735.577438132151	30.730442112783777	38.83351684953406	72.88802280068205
745.6259279172529	33.28239344782221	46.557985196592966	67.78412013060519
769.9019771255622	33.83113794887947	49.999687717983946	68.47952081600823
773.3346478470967	36.370176969281644	56.155267769419105	67.12170605934793
791.4542433011774	50.882219815523655	49.00780200870416	74.94713888696273
796.0518842284043	51.978087983224505	47.57784623950571	72.75540255156103
803.7360834069793	54.718802009571654	56.709420587236465	63.50474792888507
818.9982166178694	58.361764709588456	52.67847727938404	71.35786430823862
827.4734928684803	55.76253685779093	59.101319066008074	64.86962286791068
869.7340934122699	82.91107459242119	46.795603823368225	78.88449346818736
867.9115696802825	67.06736889116722	48.47763135800157	81.12660593057146
880.4607259944556	59.42339998315534	55.77542326545504	76.16697841172045
885.9256789408494	66.90761866155731	51.06037762020168	79.8431217975192
912.1543854047718	79.38022998728191	49.827377876977465	89.73050011161192
913.3394587488706	107.82846486787658	49.63241782887611	98.08962955331211
921.9836562491787	96.10367795790084	50.702646675211504	98.59092356457401
921.258235581293	99.8517078073041	54.474132826838414	109.66002239261232
919.1173169812223	99.12794058651005	58.75597002697997	111.10755683420041
902.5754000673892	109.4742957673376	57.4799689732737	114.20242446734157
879.6349086899631	117.42649939187311	60.69673497959742	116.96361204575174
855.5436691239437	121.11304719039053	64.67923516189802	120.64051118615149
844.7830533126246	122.09248518281466	71.77564552723243	124.45156370422475
845.1591523381244	131.2778007101873	71.0234474762328	130.5787735781538
832.2731121781887	140.1003659595296	68.53539479408404	125.49370219147812
821.7641322364118	145.0434717168069	65.37349147253015	115.60749067692356
826.174681289632	151.67460915022195	53.729879861003305	116.45778333552482
809.8016194664601	156.60413805511905	62.76806725275972	111.86715580452784
788.0869756814304	168.8182470706666	68.07743323975053	106.49889856496699
771.3153756071125	178.1418661740752	63.36511120090254	109.71195875099767
751.2786886966535	189.65972290158308	57.520092799073254	119.08922804145068
722.8968895209592	198.4434226627634	56.77159830930473	112.47651286978663
694.6033133553618	201.1920561573396	52.8920768061543	106.97924588063424
676.9586692956498	206.39555245166719	53.44209646661129	113.9418875214626
655.5546931485345	205.98504640265264	54.76900580220957	112.17033443457714
631.5867473915723	207.36057433148656	50.908460447920056	112.00910042032005
599.5252271542281	211.25381023390625	57.068774392329445	106.74274716027544
582.9626389996191	218.56719000580986	54.49556210604419	104.86541211486218
560.1082972241812	229.81171373792955	60.55490615808413	97.24486696268613
539.9370447193063	240.16137645386877	63.87462385445517	91.35465645615926
524.0297812689805	249.99175923964066	61.59970406236408	91.17357470903994
516.1406596450329	241.48048266984128	60.6158707035804	89.039468869577
504.28296400911427	231.76253723415627	65.56225283775322	82.66797217665857
505.47582184059985	227.309324190536	63.17653717478206	79.92217227980547
503.11171667475827	225.89023351646586	65.65508531132072	80.51069143280122
504.5552820893633	215.82778984462152	62.767954482110696	82.244785334422
496.3223881957791	215.48066597556252	63.28417328204368	82.93903307253997
487.40303157346125	222.38695300556486	65.04023885496571	85.20910668424905
485.6940988252618	230.290470988178	66.09730844456637	83.56684615981231
488.31511903686754	237.93471354928406	60.85526802135483	82.39575119812245
497.3867736608781	220.26198969602973	44.96149528313057	97.49537031646017
508.0322281296909	242.30246755809952	47.92503346572339	88.69361040354747
516.973774584447	254.69658999661527	47.061072268756305	83.05188870312926
527.6724706296656	259.2257511388427	50.01565160770962	82.11089022847116
536.8537982766612	264.9185135444773	54.3716129223184	81.05200933020208
561.0074411958399	274.3059542654858	54.87683514597144	81.37767452114558
587.251664939039	293.59325830882085	51.506497156266676	79.1077560624664
554.2136107451161	318.5636688958864	45.99348235414026	82.34742640088601
550.5263136625782	326.7061056193993	41.36361834253375	86.06998324833066
543.4690676228138	376.93449703813144	37.69669081509709	92.30171805265975
535.2252855224955	361.689166504612	42.17489947427126	86.76431249531193
484.30761231083846	345.5422909359296	40.01261091069736	85.05883681004035
459.6417574487185	336.49745736410773	44.78345761845628	81.83678685884541
430.5647454916423	334.75991906066037	41.78813581222333	83.33930392637285
419.8859671914116	361.65837223193034	41.77093500471694	89.7803502790148
371.64654018867066	327.05621031037566	44.552769243484136	91.7672468981765
343.6731924192715	328.817215794608	39.18370844660847	96.70258163118415
333.1528371590253	387.66080641148403	45.584161282098535	96.13746187745025
313.89971029418996	314.1036590965618	51.149633663028396	102.70442275266707
293.0653387051449	359.2082026542999	54.5999817071516	105.65267377623503
273.8120906636004	328.1934117862486	55.73484674082309	110.37908790323056
276.43645845893747	333.72117647058906	63.387810540884985	117.38593768158009
304.92119387366637	275.07925101566155	65.53125124984636	107.99926386625125
325.8754088604852	273.39973956561244	58.881783450540695	122.20719820460548
347.43269865847157	261.39865635902083	63.500913653080374	129.36217292419593
366.04041375824426	247.06773753662077	68.18206031941233	137.07572213605738
373.2583028711888	234.99734547957448	79.23877540352211	142.0971362676508
399.4605839012975	229.93216120849308	82.03877739179516	152.22750480981355
416.4280692693381	218.69605369526187	77.28461965042145	163.75691496326078
429.6491873052546	204.1877837366683	76.98293563568052	166.63290282335578
442.2159301393857	198.5889608934816	82.01719331683111	166.51764475369944
422.38285342940264	200.59431535026096	94.68458918397278	158.64997047545148
416.1658176105037	205.21703363835593	107.11866082177059	149.40453389926154
417.80405447778645	205.0480427905947	103.84218708720515	145.7165250853601
422.3573531479473	203.9236816776966	98.65179259474789	136.21663876756293
432.7532484813048	203.3580918265289	88.9206103601357	133.66094899253076
432.5412318226224	204.48121045081405	82.36969662539364	131.41471174396042
420.0062446606788	199.41207028542266	84.02844068233475	134.86406914132996
410.2221797280505	196.44908606986053	79.62992181881538	137.36623061120056
414.4876995365929	196.13699580892376	71.09888220173059	137.9904111330741
418.48496598704304	192.19981033077676	72.8553877344317	136.11374365576668
417.75538971068016	186.32197545571267	74.31454028715748	144.6164748849352
418.0267024803952	164.88656847089732	73.7719147477273	143.24824398946203
428.96200343109444	145.06533252850136	65.39560381566785	152.5285611932412
424.938027638619	134.05562790807073	70.08095778653536	157.73498236368584
439.50674367932373	126.68998741643628	69.1086276221761	158.38371238842967
542.8183102418501	144.87789559862077	76.77327492560227	146.598297056837
558.5337912529066	144.87373838694947	69.66332522263224	167.45319346801645
519.5207370339241	147.03745557248195	63.65049957417431	166.7796257963612
532.4115292130327	160.97522216376433	66.16328934872583	163.66166997996905
556.0803115850132	159.3275208266926	75.41665488935892	145.73547379738974
556.9121458821014	190.24195264542945	73.75298629518242	142.35966951237987
574.0388867028399	206.80189781416055	66.38111990169192	146.20200014089917
602.7439512552377	213.30170146053513	61.58279861468727	146.35534480259776
554.6357782256044	268.9371563989906	77.6525756593976	131.26031774315416
637.564170009434	259.1829954647151	61.88348208532925	144.24308787285355
611.0398982646409	254.11984168039584	70.40293062290749	132.10484796548803
619.6486988166706	253.00251680581596	72.09657314167633	137.49137165178578
608.067881221889	257.2750228146305	75.6971022685762	132.206543977934
617.8380602276696	247.31020197111997	69.13153154152853	126.18661109592767
702.0620063144905	243.5462354769035	64.99976443499148	145.88610890414617
677.651366677313	245.95475081220792	64.9301384364333	157.3660466578417
672.666375114909	245.0160383577288	68.0516653504599	155.8192434614092
585.6889837647541	283.99218678570907	69.15001681857221	150.46664772297163
574.3571384015036	275.78639151204777	71.42124288644908	143.08702950189962
577.8343910014107	272.998289037944	71.1279727825383	128.67952916239682
571.1844628764864	254.07267246707917	59.517651177293445	129.16549552148598
563.4560857774776	247.96884911123246	54.532013191719955	129.69177527112737
564.8916462092019	244.60815220761305	51.66089232827122	136.4131690783662
576.022143125641	245.39177881422282	52.48498395307819	131.96028018293595
587.2465754896128	229.7752420746949	52.727619430892574	129.1561033533547
619.5323560369475	279.4425998014564	52.56473632869055	139.0361027566238
593.8952607781434	286.4732361932106	59.74626552890093	130.85385148210182
581.8605490047471	276.9083979734393	63.173435815777474	132.2901679845735
596.0542933231288	250.17154525784466	62.05302100383188	128.20005089670298
571.8746321867609	265.4954788588753	63.204462830615896	118.20563138974572
577.4185826139371	282.5495079798865	66.23573715146478	106.68825342804519
585.4914869634404	290.0272038400675	66.31704871687623	105.25546192803142
611.3383303771603	354.2174774895655	60.259472780653994	116.46772441393713
604.7400690952473	298.93623970581143	70.70830634024522	106.13188379510785
617.5942677171242	298.6880250358425	67.16696098756935	106.62831313504566
638.4202380703075	308.0763780983294	63.584359810039146	101.4477996989419
641.3546369666217	298.8443637360383	57.715562017410704	107.00295566401205
636.1482246486198	317.43423563203254	50.17480858529284	121.11914920951429
641.4558826598366	321.7496848566677	63.31111071522102	104.57104470945667
654.1022742286328	320.0910714849029	69.503642477306	105.2644952113466
663.22319438657	316.174032411937	67.68867430968932	115.83638538198797
