# Supplementary material
Source: ML conference proceedings conference paper supplement (https://proceedings.neurips.cc/paper_files/paper/2022/hash/1c8c87c36dc1e49e63555f95fa56b153-Abstract.html)
Supplement: Supplementary file 1 [file 1c8c87c36dc1e49e63555f95fa56b153-Supplemental-Conference.zip › GOT-10k-Results/VLT_SCAR/GOT-10k_Test_000079/GOT-10k_Test_000079_time.txt]

0.018679
0.018982
0.018741
0.018953
0.019049
0.019037
0.018938
0.018991
0.018957
0.018900
0.018883
0.018986
0.019088
0.019202
0.019046
0.018861
0.018876
0.018858
0.018851
0.018850
0.019215
0.019053
0.018918
0.018710
0.018856
0.018626
0.018547
0.018469
0.018318
0.018331
0.018279
0.018291
0.018380
0.018283
0.018468
0.018672
0.018496
0.018319
0.018415
0.018431
0.018406
0.018553
0.018552
0.018459
0.018317
0.018330
0.018381
0.018386
0.018423
0.018329
0.018427
0.018264
0.018199
0.018335
0.018418
0.018328
0.018298
0.018561
0.019069
0.018842
0.018896
0.018791
0.018447
0.018589
0.018592
0.018504
0.018311
0.018456
0.018648
0.018509
0.018288
0.018490
0.018421
0.018350
0.018255
0.018779
0.018747
0.018720
0.018482
0.018995
0.018959
0.018342
0.018470
0.018348
0.018499
0.018411
0.018656
0.018623
0.018574
0.018427
0.018384
0.018308
0.018826
0.018425
0.018484
0.018395
0.018875
0.018840
0.018961
0.019356
0.019630
0.019271
0.019227
0.019225
0.019080
0.018900
0.019202
0.019434
0.019602
0.019548
0.019527
0.019557
0.019503
0.019457
0.019434
0.019283
0.018517
0.018462
0.018358
0.018349
0.018261
0.019507
0.018684
0.018584
0.018409
0.018788
0.018902
0.018953
0.019068
0.019421
0.019570
0.019170
0.019216
0.019148
0.019201
0.019056
0.018992
0.019220
0.019091
0.019109
