# Supplementary material
Source: ML conference proceedings conference paper supplement (https://proceedings.neurips.cc/paper_files/paper/2022/hash/1c8c87c36dc1e49e63555f95fa56b153-Abstract.html)
Supplement: Supplementary file 1 [file 1c8c87c36dc1e49e63555f95fa56b153-Supplemental-Conference.zip › GOT-10k-Results/VLT_SCAR/GOT-10k_Test_000080/GOT-10k_Test_000080_001.txt]

816.5	500.5	187.0	343.0
814.188562569283	499.67642660332115	182.36730072579655	335.39157265772013
790.231327774849	503.9098624565025	181.89679198462238	326.9247009513575
779.2240469670661	541.9479143128376	195.9802059373498	306.36663087855493
761.0873207595484	572.0266191800963	216.5274986193075	285.52462047673157
751.0887792330352	578.1913679456063	236.52458167233397	273.19512294571143
749.2228999782226	597.901027293938	264.32200126647194	257.84146533356085
761.2441303878547	607.0988768106952	289.6168707920152	247.6686546908476
748.9358202231862	622.5469796193076	322.68823103403446	242.13666881166972
762.6448346296477	624.0976134643297	339.6313915116174	239.03540112162563
791.6565481232993	624.0389885264433	354.2349484861506	239.15265099739847
815.7686836394648	624.137547608488	361.8145618801468	238.955532833309
839.8915549591896	622.3858752121994	370.0369659216874	242.4588776258863
842.9018630781886	622.6403004949588	373.60950082797535	232.35687591608158
859.6045585630434	582.1768422517026	378.11507054056995	237.461871037986
854.2295171204862	554.4629034367085	388.8651534256842	244.73647974703243
847.1727497676364	540.9304326647687	402.9786881313837	251.97496207589626
840.8651984405017	540.943776557827	425.8392590806526	241.70280599477988
820.4386879950619	538.5065239035662	456.28027211061453	236.16530344238424
812.5021489292706	534.3734064674908	482.9193871953131	233.66550136141927
810.7570664286699	526.0314090141512	519.7480204955507	228.12385073540767
812.4328645383287	522.9207348857376	551.0508989809256	222.793707424004
836.0085640589319	514.8140101289821	575.3551443488548	215.18860880113658
861.5191507156982	517.114711343892	597.0671370683751	210.58720637131654
874.9364642719024	513.5657479777072	582.5820581615254	217.68513310368618
922.7358322418286	520.1991726219429	572.8785007118646	216.6890235995279
976.6893246796366	531.2442202333514	549.767402083434	218.8263244473353
955.7021713918157	564.4592451137104	497.1816673386171	223.31630567696158
1047.0779029880978	585.4700445220844	470.38493027469383	225.85320003982508
1090.9684486056776	604.1876477136153	468.9557826817768	220.79997252260452
1137.8234065326674	625.5473840476257	460.7266854740833	199.45070451615544
1162.5375187598963	626.3620160424969	462.25301119190726	197.82144052641294
1184.0930287635167	624.7607638974664	449.69461478597543	201.0239448164738
1211.6417482949516	623.1707962895454	444.89083677769213	204.2038800323159
1216.2483690123256	613.0527106387573	445.72233867702107	214.39530799981506
1215.8869070930991	595.3975191806709	446.44526251547427	208.76675694831107
1215.8354266317644	548.6951208909558	436.4010636632744	220.99427532878866
1193.1285911033685	502.6231907284781	430.75074935989335	231.4357590774675
1174.1807478592252	431.82686673653734	427.40899019318516	239.00670868261707
1154.8737866359602	428.2181374118615	424.4654823020137	235.83480974754335
1151.0318943626748	421.0579081852336	421.8574602572991	239.86346160951348
1145.5233830656273	411.1399076429567	422.5526828161487	249.37766265882198
1137.3852950808578	384.83987721039546	438.82885878568777	260.00430673597253
1128.9972230004166	375.9135140370746	455.60500294657004	266.94223572665675
1136.7905020760352	369.38655097960884	485.14367993074313	268.7148530577358
1146.3868088899185	362.89664000496487	501.19757764537314	269.9458378928914
1187.8067969254728	358.77882413859714	502.40452027907077	266.1747669535117
1204.9725213195425	355.58144438466644	503.95255843335076	260.6096974805665
1240.3279961846015	358.45153691171174	504.5630754620199	254.86951242647592
965.4117096177563	450.2354886545662	511.7403725235872	236.45756252793484
982.843736917105	465.0690384728292	523.2025190104471	229.95356343418757
983.3606480214111	500.9472358047657	545.4362808410376	204.7323368487196
1004.9924277329972	490.71905215871016	571.2029987476512	213.68365791919967
1015.4377222340293	492.60926084654693	586.4191411083835	209.9032405435262
1061.0614449828472	470.3917469264281	592.6519468404401	229.96820557634067
1100.6204273303856	453.7496769231654	589.3497317964491	237.98042903250405
1141.5159310802487	438.8582260893345	583.9487932087429	255.03165254816258
1169.0313152594426	427.6972407368727	580.7418872045903	264.39765766452746
1212.6812784016315	430.53451417158055	584.9607611201556	258.7231107951118
1227.297975856915	434.9615113211439	581.7987015463093	249.869116495985
1233.7001364240064	487.9130934425293	581.8280796884683	233.80184718760898
1225.266012296448	492.12706480127326	598.6963279435848	225.37390447012103
1199.5377748987503	527.0458348862087	624.8724423092565	218.73726537455917
1193.0487484186128	527.1634436565365	637.8504952695314	218.5020478339036
1182.1915833388493	527.5435495678483	659.5648254290586	217.74183601127987
1158.3955684005189	554.6935857775453	680.4155090569876	216.92445608934992
1157.0238342268058	557.8845038249838	710.4628674352566	210.5426199944729
1182.414789586414	589.5662560911628	743.438809574059	203.01768403412706
1162.8908720673357	594.7292294258815	739.6332000500472	192.6917373646898
1196.3044761311878	596.5735267007724	714.9153916520154	189.00314281490807
1218.5542443803922	596.4015176081618	670.4158551536066	189.34716100012912
1284.4747732599008	593.2900035821588	655.5649608655401	195.57018905213528
1029.4020242644	667.2144890089754	597.8882340323124	228.39192609712046
1049.8035134731836	645.6036572485747	544.4023985501196	246.24787548866956
1213.2248166382606	524.2246810492788	584.3954544515066	219.99300891746395
1054.5436800231905	597.8815544131572	519.2706171821496	257.7536704959156
1146.3146219676548	471.39250337269146	552.8464870105686	245.36562914453347
1084.201442609553	497.50367318779854	541.3888792508855	279.48763181715645
1032.6169976981394	462.1222305471599	529.702996728129	311.965592983239
1004.5916416963701	445.70484799626524	506.89406656323763	331.65708439029
978.6304804704166	418.0965579758256	480.0169197312774	347.47392978923585
979.1892385556446	408.10606360896077	452.9204168359697	354.46542516053955
952.4535454485606	406.9418159065682	442.9363929376824	344.10283854283347
953.6170395822497	413.57216822205845	440.609404670304	330.842133911853
955.4106419421108	420.27067357041653	437.0221999505818	317.44512321513685
951.8767436494239	428.6336631967198	444.0899965359556	300.7191439625303
950.3753498187478	432.9481705930716	447.09278419730776	292.09012916982675
937.82424509615	440.2431657604752	460.6184773661771	277.50013883501947
924.3387399337355	445.0669387380686	476.0553472124475	267.85259287983274
905.6928163922872	431.5442623192819	501.74738279217104	260.0985112078864
903.526097325144	406.44392534540617	517.9265507426765	251.0705360745443
905.288509472691	398.1633135460475	526.32823260439	243.77874735964622
917.0905020343484	374.2638559375596	526.5679572400409	231.96838817920712
875.9778551210943	380.9927999880367	503.33070171923544	218.5105000782528
891.6570240463438	376.61610517537906	494.26067660577746	216.11973333504773
906.5063838668948	373.1759161572427	453.59133374015676	212.0294881468015
943.5558480492524	355.18176717105837	431.0334201666066	206.78497428623808
959.4269078947538	350.0199383586581	399.29130047560403	207.22066799772887
977.4009708646229	311.504085246611	391.63580003360073	208.80537289452894
978.2049594268578	307.3905420131425	399.3733589651937	207.68692330540293
977.3168313065056	303.61131647176103	401.1496152058983	205.80526995654304
