# Supplementary material
Source: ML conference proceedings conference paper supplement (https://proceedings.neurips.cc/paper_files/paper/2022/hash/1c8c87c36dc1e49e63555f95fa56b153-Abstract.html)
Supplement: Supplementary file 1 [file 1c8c87c36dc1e49e63555f95fa56b153-Supplemental-Conference.zip › GOT-10k-Results/VLT_SCAR/GOT-10k_Test_000081/GOT-10k_Test_000081_001.txt]

813.5	611.5	422.0	114.0
823.6345887213674	607.0220938316315	457.32614538575626	130.04085845509275
822.0654353556401	594.4114525390299	460.4644521172107	155.26214104029592
828.4664574019349	581.7033119202757	447.66240802462124	180.67842227780443
839.1218987784255	574.8870430505473	407.0130429598685	194.31096001726127
853.9514768972007	553.5235020536687	358.71311239851207	181.1157190396002
855.7486734456891	555.7761190490305	338.34784330847276	168.22504705234553
861.68486174387	530.0777263427314	302.88269815798856	156.7077829872839
878.5785484037938	546.7858919017483	276.24086521836773	137.58253262970354
903.6870816384126	573.4581065651398	270.9973763049969	122.78688406509204
932.5096590251752	601.9323505642853	274.25750810811707	96.29103935512364
985.3471032480015	600.0782344423836	264.8817906667719	99.99927159892691
995.178269500679	633.6200096767095	290.00001572155156	83.29384838542687
1006.6330075789965	642.1675357363191	317.93005960943276	77.49646738721118
1012.5896354657556	655.3451980857467	353.47627054240803	74.87087604160277
1014.976131586757	652.5927561496956	380.59800295832576	80.37575991370507
1053.076183996455	635.4386451430895	379.8991229376793	107.82023421794
1021.5173701580707	597.6398921507285	332.3799371910345	124.41143971017488
1019.6208423657467	561.9291677458524	280.1353960466978	146.79999138206537
1047.5899071593778	628.5577357910267	290.6064076559909	113.15656708655035
1074.2373516963796	637.855133938642	311.748166819557	88.35871677152238
1063.125578447923	644.7793744574731	303.7197277304348	74.51023573386007
1070.3004055333743	643.0304381514105	334.7810019299178	66.6553762533888
1066.6242405129094	635.2800953714479	354.05109960516745	70.23829417899368
1084.0331965977423	618.9689532806993	357.0147671445746	83.96978850595444
1094.5612187918573	610.2286937329295	362.3725604307085	101.45030760149405
1111.06624239136	600.9340310260022	364.4095395034775	120.03963301534868
1123.1889791784774	592.9064448942186	354.9290305163874	136.09480527891617
1139.1838669487736	581.5980764751129	360.630409356036	136.09684948898277
1148.0749070220252	560.5646102836647	388.5687161377856	124.82333045558448
1185.2732521119235	557.1735936517111	431.3766611662971	123.79172137227107
1021.6738581184529	538.3264475735302	456.15193474539717	111.08209446065935
1008.7140304309175	536.225984512312	439.5237614919183	115.28302058309578
1005.8704469707043	535.7266308382707	420.14360405581874	107.92595314566987
990.6856245755387	520.4310777436424	394.9026546564188	114.68394753932745
993.0741840158408	490.68399390310503	413.2726290436933	135.59962644060374
1031.125352149284	457.605061258	445.8836150920016	143.21954894570922
1068.8532452300185	418.92328897921413	460.08671966555187	157.82186998876756
932.9060677510665	446.6919727894691	448.92230393011084	168.33154886337144
942.2636357285099	431.2954774995381	458.60552698747614	170.72618043098134
962.954111148538	428.9969516608714	465.4647172999797	165.6752038778028
941.2159674635423	425.56363322983225	499.286174862504	162.88701093241406
1008.3262097544005	392.73709112153574	556.6978066103911	147.85288827338474
1000.8482261685768	353.24559600238024	529.1817963538867	152.5099180124303
824.0221140404519	414.4284166782538	480.4529717902529	195.22368130473797
886.4028232388858	363.9370590422251	428.4975492440373	244.20211382632948
813.8159599593288	359.2799772434646	374.2884210616883	284.9977808040815
850.7331333161696	534.2382568917949	393.68171905734687	235.4814100152962
845.9602722088548	579.591845533099	403.22744127197655	184.0920895520951
848.355426335754	594.5764498769798	434.78414406454135	154.1228808643334
831.3348270327494	617.783215487982	441.804413429462	125.72330246972169
818.348734943683	626.5580461198988	459.1926795995197	116.75755921396352
797.2507386399766	631.7316420442768	475.4085769916286	115.070399103642
991.6345470133822	619.3406310622046	502.8468004053425	130.99697766011576
786.0479239239735	657.2845475134045	532.3117433310413	121.9080978270117
943.4769819606184	658.4043782887386	589.198428964339	119.66843627634351
777.3980923048224	617.5464139740411	626.4245193105542	127.65144266439424
787.0955894144793	580.9738034284907	595.822535972647	144.76171816252926
796.5796726523963	541.3144631618254	576.8543694968131	168.53642676834568
748.2801381796155	521.8375501212147	515.3996758239797	207.49025284956696
739.0952704096403	501.00251178655395	444.7860112780341	249.1603295188885
796.8069992676874	520.8359358043434	383.4584842734025	274.4085983370649
813.86833956567	560.2093457362465	359.6602704033973	267.93304555497843
816.7322393777015	610.5918973865898	383.50326995828647	216.45260755254523
925.0581972744005	623.1543407210313	363.32975741967346	200.68383532436644
924.6699800758133	608.1585047747648	381.68477377186133	195.51834330687308
919.2290321455785	571.1183454641764	374.6249973137502	215.77364497230644
919.9801305450885	688.1404498500453	409.9751926149571	184.41759275181738
828.7317547026412	562.087893998464	335.1384886952855	215.9511710796375
846.8705660927956	543.9983501717784	281.6054952390151	243.50257339502775
828.9032278941079	539.7958887925795	259.692353357701	251.90749615342554
840.2985060182909	532.84416413795	244.95825446091442	265.8109454626846
822.9663105007396	602.0156357269025	271.5807120755584	248.09700359165834
797.1113110965027	645.0482131886247	298.745275540051	227.48634291883025
741.4983794015634	708.1872475617135	319.0220901861063	225.22970427786618
901.6769769378889	526.8992937867804	263.3744288179404	263.32295760933175
915.2677758102656	499.5520404611841	236.19283107318705	276.54522915827846
915.7160773465303	541.7199644405084	243.36458926975286	280.9613551596756
907.0552680145429	544.348240075466	260.6862079337274	283.9565968313392
911.884364999812	584.2208889089022	285.3283925053699	289.96224551991816
877.619260493143	574.5593656760063	299.5008718422233	309.28529198571016
862.8529175047349	565.7166052268971	300.2729354603342	336.557687003497
834.0065362922883	573.3279209663818	287.79239055207785	361.43408828632727
797.9192031218818	529.9081373879625	288.5139790905529	376.82057764082816
767.4010930702664	535.6409431811928	307.7317502284267	375.80957829570696
754.9302675477593	545.8752461061287	321.9223261642268	376.8431226642627
715.2251175585225	585.8263453878992	346.35422733847815	362.9150026657886
679.5027886297893	559.3475275102735	373.1235533204167	326.5219746699844
625.736819641244	593.408843422479	414.5839241460602	313.4589821384461
547.4439054502488	647.5923557302895	433.91904273579814	330.90510816572277
567.142283695322	629.5360226040648	454.60794100730425	355.0006434658418
577.7429369068209	615.0286932539157	471.58341942160666	384.0153021661398
600.2573060761747	605.8050795623811	480.38004759903026	375.5498462911433
645.1217920255181	580.152758206827	471.3745558950835	332.67709544172124
699.5608734477219	595.955898808729	450.80171671029063	275.84072176374167
657.1065572852676	582.7513389473245	456.19064348750584	222.73013593885725
706.9031484751063	600.4441780059659	440.8570504986874	187.3444578215744
804.7063836606411	632.8375945304713	390.5924080069328	180.69435592428977
832.3778027229924	652.174394713951	352.93662899592965	186.238403341579
829.8131751384044	652.619400850976	358.06588416510573	185.34839106752884
844.5940353152893	664.124633066657	353.8510163926296	187.68477921746057
