# Supplementary material
Source: ML conference proceedings conference paper supplement (https://proceedings.neurips.cc/paper_files/paper/2022/hash/1c8c87c36dc1e49e63555f95fa56b153-Abstract.html)
Supplement: Supplementary file 1 [file 1c8c87c36dc1e49e63555f95fa56b153-Supplemental-Conference.zip › GOT-10k-Results/VLT_SCAR/GOT-10k_Test_000082/GOT-10k_Test_000082_001.txt]

996.5	130.5	330.0	595.0
940.1515039225425	185.3951227093807	340.7800370955017	585.1267096406518
901.9626057460266	240.7692642210597	359.3429690969369	575.5544392325879
838.0688104296944	352.2334763604186	370.1383032657111	557.3624637656782
715.9693752418565	412.4544047019614	396.36129101186157	538.6426856430378
659.8531139653603	434.83059487098035	405.8212859446627	508.5720949650272
654.6269479143	442.434689046064	416.2736180467831	478.986757472042
638.6390640044374	408.98774169971546	434.1594476970489	447.251084978524
629.3127477732885	369.58087778139947	452.81208015934675	415.02402843811535
661.3300844411638	375.98138121879634	470.7582329008356	388.5595505504483
720.8733889698092	405.60735852678135	486.8423913586235	369.858826189002
761.6250011013753	469.0959714613629	499.5582967306301	337.1007299549775
790.6165042709822	540.6826009814396	507.14273590075175	298.8353837297605
807.4115132388591	590.1850494142286	486.1388610044712	275.3473451010227
802.2253528055892	626.555812034107	472.758201407656	273.864761251331
722.5787065115322	494.09037773596276	445.6022584376626	270.77485373284026
697.5092558719734	514.6591158763483	439.7550244680598	252.03183155155727
675.8508660645072	495.28506542703497	418.3105716215112	226.01869998870262
582.1362239584568	512.0053487405572	385.00692426915447	222.6780785749932
669.549977327553	433.43359779322094	352.440909681819	209.10778988863729
640.4273939299446	507.45398948762914	322.9763485598723	192.63159837556614
682.786356218287	568.8140704836819	359.0786991607524	158.51297151367464
677.3392476991485	355.28412010146053	313.99673871566245	209.7328234612247
732.6319173548463	499.3143336083991	326.51261982677755	176.0815853205368
729.920078523083	371.5801075905922	339.76203231939394	157.64931833800844
763.8425203352095	344.8726330844182	279.61802935435753	187.96162537270635
771.7212787501715	274.27982393391255	322.4845615062668	153.27509672821844
757.5982801693958	269.0253811717977	343.35769944971423	126.91968616192906
777.9623791802371	279.94198164266555	353.0798235432534	126.70805184100264
785.3727115836314	275.4771499161958	360.2865302385608	113.61034379184645
838.1707307381433	273.0499539405196	333.9537643342456	104.0532316696154
847.6534647229489	272.11344063067475	275.0524673330484	125.89417280509805
880.8912152844312	295.1901045785938	252.00446321883567	116.96441377390421
944.1023175589186	313.0340315808933	216.9808868876869	126.97587387821821
942.391756208074	378.92586673015313	220.40200958937623	118.70402930652946
1009.0945707242292	341.0281099448896	197.87372099609453	115.30144256346456
983.9557641748144	293.44128247287665	169.929767397812	132.2535308103781
941.1108962289399	369.28158849389683	198.62507013663642	123.05900165064978
953.7948527634355	426.52536799257786	173.25715706764512	134.34210581883178
971.7275524868842	420.51676453615596	176.0668118040444	112.5186403212912
951.5936464845588	409.6038321090436	157.61333524639704	129.82748297841601
992.3087667284191	344.3622788884453	148.52448117188146	133.7131631965039
919.3279984347253	413.5060420054177	147.86183714249057	133.16350360256297
758.9973583467593	356.31300023219933	154.41327035756228	128.09936365684163
680.0636126196672	355.0367992877835	143.401520783016	126.20757499228573
536.770361113724	359.4335733023454	162.6378546204981	117.41402696316185
367.84944354580176	347.88239021340473	161.99796681377723	122.93292701415675
272.3774525159281	339.73863708646724	147.020876391792	125.7907981061795
226.74465337736012	473.54563214410507	161.01259318095137	120.04940636682412
57.38235434480397	469.59565045232904	190.72881947093973	92.63412726179045
-0.6563187571581892	417.9903224126642	157.3743664574248	107.94372497792045
110.87824220074447	513.382917160653	154.7889364712048	108.52173979818663
189.92297793213746	553.8633591083558	153.66189832070773	93.65030150795532
170.00495917702045	461.3573862519287	131.64340092945983	100.83045937904924
100.18941848059923	513.2521147932281	121.503231473142	102.97676509219778
129.63938238755395	427.37211945008147	119.11701455299321	108.72773002806912
30.431321664674797	459.6091264039768	134.58728493167473	94.47414582496612
10.484194858846834	551.3019410904433	124.17376947810396	101.53935648467724
89.33963391872773	652.4781908787832	129.76595292804265	97.99058403632841
21.349371967344254	733.887414018202	119.0493032278334	99.7592105803422
62.79640715839378	744.3897665140321	115.33167678450951	99.40923009444953
139.1248134027107	861.231803715702	131.64595125659326	88.76699047925686
75.25866022326042	869.6042856322015	128.10306342155872	96.20429926093006
26.34509734755889	793.5014557164926	134.32027278796045	86.33087625734558
12.241976798636443	850.6033885213278	131.43858378879077	82.66187321483818
90.76708270399764	842.2801050961348	118.4260969923321	89.25929645957777
138.24337966527284	919.989194381382	114.82526551627882	83.91901333689998
15.054824707496678	913.1963977450251	136.53675213435366	75.66211545569234
-30.58509417468646	952.1513063184105	102.1445500249632	93.65990768626207
20.51985511788962	873.6890676925443	104.75022357402548	87.19540484642494
103.60465843330763	903.2033482805218	101.63921591068846	88.55891736213638
21.249607467451824	884.1130240252357	110.68862374469461	81.83744257529338
91.96601079913476	872.746516878022	102.28470020446346	86.43015462565702
105.04315013674417	952.6287813886868	99.88453584190442	87.00589721478111
154.97370408830645	961.6069415306778	79.44146884565502	101.40507507804462
94.31575984375017	968.2467366168892	78.52034037499746	96.653648879559
54.16330405781138	885.7059453124641	65.15702102554799	107.45814526504705
-24.396443528930874	968.7554434217238	84.68536302358794	84.34603371904842
-3.5980793783549956	993.6301266949142	88.3411118416814	77.18723387313358
23.44818324683864	979.6257129341775	86.3539001764074	76.53813892279491
-17.998905507865068	981.1444945993863	69.2495682099416	86.32089732005319
