# Supplementary material
Source: ML conference proceedings conference paper supplement (https://proceedings.neurips.cc/paper_files/paper/2022/hash/1c8c87c36dc1e49e63555f95fa56b153-Abstract.html)
Supplement: Supplementary file 1 [file 1c8c87c36dc1e49e63555f95fa56b153-Supplemental-Conference.zip › GOT-10k-Results/VLT_SCAR/GOT-10k_Test_000083/GOT-10k_Test_000083_001.txt]

879.5	181.5	350.0	438.0
831.7207001438563	183.94808583794944	345.4378923609511	432.10382832410113
795.2785424888622	186.56539730030624	344.9678808054603	439.0949265436341
846.5926856422568	196.91496992766565	340.9410476221336	443.04614456978084
899.1409428453223	193.2526819644892	334.404933592286	450.37072049613374
945.0816706004302	142.7005364066548	328.7977283866363	452.87586840658435
946.7661208306115	141.2250696165483	325.4288279262736	455.82680198679736
955.0533703096662	155.22644832261275	321.11464888929356	452.3446844169271
973.954154395339	194.39660327685846	319.7227409886376	446.82369504981466
972.6702126817306	198.19899116283563	322.29062441585444	439.2189192778603
947.0355729218298	195.44348925416807	325.73237870137086	432.77304178662416
898.1956882583795	178.74050746034953	328.0905908089329	430.4334214170093
865.081094557213	161.67989575773254	334.7295431476018	428.8005037840446
871.2086056816468	166.6756094376375	334.4757793955654	418.8090764242347
870.3963288644725	171.63615752098303	336.10033302991405	408.88798025754363
870.3667169774214	176.91807069536318	336.1595568040161	398.32415390878333
900.4338351476855	334.2653406365861	345.36318535984833	360.98107361177927
953.2620835721525	175.53839983996025	328.689503252269	322.50369623961245
957.0720533632295	356.40347703265024	321.0695636701147	288.93019290659436
948.5713299489735	195.30019971218226	328.4680490514424	284.6360583432601
913.8052170360211	184.90468215849725	320.80817685749247	276.4800566931846
894.6544576261656	342.49213585237135	312.11151756777224	252.69385358391014
930.2430719172964	168.0783255280062	303.1101063226297	255.1133490686917
956.3092533895036	226.06840961800575	312.4572953263389	218.17831910770877
956.1165623804778	193.6398042195951	312.84267734439044	216.448112232975
1095.8950035809596	159.5767976267565	298.9068577217563	234.77017614771543
1093.8907819247625	276.3236604862964	302.9153010341506	219.39502751537628
1198.3897429682897	132.09901899426382	290.6940341664383	220.87835497123444
1160.7304601492888	227.3443067078664	261.525354173124	207.2123490739488
1082.1037965849082	181.01300531654638	308.23922128963454	181.96619451018802
962.3136890297144	253.10510260192865	310.4997679592328	160.2695707475726
923.6928915664123	248.41785331221365	292.5981318774061	162.32535924943102
949.1973593170733	311.49746068779314	248.67953020228754	177.97282102233373
981.322613012215	214.22349011709653	231.2998212194051	178.34174019020776
975.9762241478097	357.7223383400377	203.3672569811073	174.59655150311863
882.4092965623985	311.225427463485	212.06491291270456	172.42440032863726
961.2245561838272	453.75823357089894	193.51307940717385	165.51615958846315
976.4027966293846	380.18442557507154	168.80630303547073	182.7205716336457
939.4491700724363	484.73308483045685	198.43538002949253	139.66641357240547
928.181729151479	479.55509838796047	183.84022602355287	139.4138047865826
829.5026930871214	547.1402224448293	193.2907918477718	121.05092545672105
934.8832012339809	612.7985463197514	223.4860120519836	102.83618463447718
811.6399809938054	600.9764868091895	247.75665204213743	96.1781490433014
809.0459719276469	605.8839074446137	268.7941405646038	86.36330777245297
915.5709739655396	628.1666748229367	261.1500970833229	90.4465531566106
864.4869566068057	666.1783831853791	245.14882870209777	100.36444777622987
787.1375965504551	645.4695532057062	234.91566852568292	104.5394250896461
838.4918310138297	692.9002119099841	258.11725172107737	88.37189025742988
782.7745959953363	710.6825518600701	232.0041243136758	95.12954803245418
846.2760280385941	714.5241373636577	246.05729988951992	82.40866132305203
758.6219450333757	715.981116924732	286.1056304398244	74.48507866534308
756.13944224412	716.7446267226878	318.21371087275776	72.95805906943141
773.6402891522941	710.7659268805623	330.00931979978793	73.21613306783759
824.0155305544063	709.272364594969	331.5899871104786	76.20325763902426
870.5573102946771	689.8436712606799	323.8921150928222	78.46677825208042
920.18676904227	689.0571997304257	315.15042918503923	92.10868552424246
936.8449134924406	658.701619941906	300.33930181187964	97.30436051973811
963.4913856770097	639.9577095539519	289.42851936048004	86.35542481823074
988.2431079888688	596.8032691307474	291.20472808992776	81.50047748123339
997.6952373510031	596.3079539413716	283.56511024971064	76.85878741795929
1010.962819868858	571.895607177281	273.3427440729827	82.18268398885549
1020.3039310260323	541.3831153624856	270.8386262816023	94.6733540495419
1042.515868791397	517.061317831322	265.51994595124205	98.62529745430476
1051.1642897343424	515.2142857990241	253.80507157731682	96.7373940069345
1053.776511706268	515.1571666151915	248.5806276334661	96.85163237459953
1090.150121107946	511.01000482373144	218.28991935635912	110.45301977330101
1067.6191065220823	517.7660671182815	232.71026931292917	102.04784172006046
1098.2568570851085	531.2737748244006	186.946007064021	121.56614293925549
1074.8530229308772	526.9000524053358	204.767028178628	91.66472485224418
1096.86798736505	571.6439062715073	174.48454238970425	102.99159970232967
1036.9032973551728	581.7167621985802	207.74811147903756	74.17930675514171
1026.1707395659341	561.5183687034487	216.27292272691946	80.06861553048395
1004.1243041702819	553.0374168328872	228.57255067184371	65.23727642522633
1020.839374503838	438.6798594137204	190.69781967804755	89.50123623610213
1064.9601927221977	456.16671952166297	189.25702650183308	93.58789548744411
1010.1082301377767	409.4995767812551	162.86816806591605	116.6807442690295
979.1327246429053	472.1103221833465	159.00971773838876	123.07817609938684
945.5214671589515	474.94831593680516	155.2992675405004	112.96887826960726
850.8966582972972	395.67424840010057	155.0302007955347	111.47901312536251
961.9367042378924	476.8205280950748	158.83008328935875	103.95606580718302
959.4798199310081	479.6063301045232	167.85959837423144	90.15296884607841
