# Supplementary material
Source: ML conference proceedings conference paper supplement (https://proceedings.neurips.cc/paper_files/paper/2022/hash/1c8c87c36dc1e49e63555f95fa56b153-Abstract.html)
Supplement: Supplementary file 1 [file 1c8c87c36dc1e49e63555f95fa56b153-Supplemental-Conference.zip › GOT-10k-Results/VLT_SCAR/GOT-10k_Test_000084/GOT-10k_Test_000084_001.txt]

628.5	343.5	175.0	180.0
598.0571097021217	401.1412527632126	195.7528927293363	147.57368275876115
545.37546196625	479.3487899810982	187.85495163193886	152.96037485033418
454.2453602746923	376.99899080482356	171.79023384305953	191.49585005877964
366.82480595462545	459.4996461995037	169.34432032868617	163.74900803419905
413.8356744295096	462.7734570060235	190.72092584006907	157.2013864211594
513.9048823110576	411.15454362089343	171.18262880886127	183.8209810021336
638.545344137254	528.0172784963743	184.61865151158958	168.094679503294
796.7769683983227	429.68618244013913	201.33639796787537	187.06034096060523
919.0266736209836	488.2042769091826	201.45502933175186	161.75591770096767
1038.3198122470994	476.5328478790588	179.89851126162222	156.5422285004123
1149.8508933973092	391.07664048738377	163.34472667788867	168.60204504015812
1258.3483250787208	512.4953744652369	165.89832420407333	176.67710381474708
1413.9938055700384	380.80117451194087	145.89529637868856	191.93133843923687
1443.5418891485065	489.5289713539819	177.0307250757814	160.24667739580212
1562.5895099738989	489.1439524219688	225.6652638513621	139.7774722652829
1681.7750813262078	468.68918251322987	221.61445034601167	134.96597223900105
1693.110240082426	552.9943337901841	198.94413283357562	127.99696879558681
1699.3357202695267	443.74228476718076	160.90176012822633	157.12461559110196
1687.1762188824696	550.0339038133153	150.1633553943799	154.8858225465976
1658.032850518803	463.5562441977071	174.82363110332471	140.49371610393607
1548.8814148279225	508.56549433652935	160.08807122011956	124.84918325128069
1441.8876296726303	524.8189521267058	217.3241604731105	101.2994951599332
1341.802602038748	538.8189535980571	185.60439718074286	107.83627370490991
1341.0212640711634	571.4106489643218	155.1045396795456	115.93867368407606
1263.8805299120957	511.1940071714074	139.09633740010446	112.9119460866616
1227.3331284296646	587.1879604622502	121.0358110401704	111.52849665029152
1195.589237785003	555.0897780663292	114.9519596329771	102.49156386685303
1183.2903701239354	598.0510143967424	108.74358060148705	98.71872948236026
1128.444041849344	581.8446262646958	140.04817434781563	85.40513577812209
1142.257542178665	595.7492093237697	140.61540491699728	75.21736417736373
1101.322814252641	615.7690831289041	151.93100782070815	62.05527483312831
1130.8051995859314	627.8583100707855	148.97642485216284	60.93983941326242
1137.4166616718621	636.6693873408071	138.9857713089204	65.94357927355165
1200.8719591661743	629.6161223053286	113.69348139719199	80.05010934450868
1233.3281349147042	642.7874928357799	112.61185094342525	81.06339158787462
1308.9721196671353	601.7359830742292	95.07819494759059	87.16964207175572
1363.4436229791625	652.3031794453389	95.17121152751923	92.2019035018356
1386.488991652402	635.126782211078	122.84710138441542	76.39339147206192
1440.2291716108134	649.0213534438832	115.08680608771397	76.65051718086063
1424.785943485455	652.8817133269736	124.94330464587685	71.93407708504466
1401.7290117251878	673.2424172645533	103.46861835671803	89.58459859098362
1292.8139686087486	686.3556752323918	102.54528564579074	93.74050195305742
1223.43811172704	783.5102408824165	117.68351159185323	81.76126518360651
1282.8053978229557	854.1140774196324	117.81675753094106	81.31811358000014
1163.5185074028298	745.9272481558935	137.79553441583116	85.34233969369772
1143.4280476437293	792.6773354701454	146.56982187421806	75.59318389136507
1139.0484205647006	829.6629913412463	117.33832620003702	101.77930352506544
1042.4554578908364	735.185661740966	117.40848523076865	101.06669223571873
1115.401460145108	812.8400382477834	102.1660638138833	121.10343231878265
1011.6626036154643	731.4261110467759	95.35738020807895	132.87694153065058
1083.8185738762552	628.3230727798264	94.32860979299625	159.97905543142562
1193.4116909189433	520.6578100670102	109.45161172334424	156.88571677460297
1278.486149310532	477.1470608935178	93.87484920838163	172.88757667402993
1223.6238306617743	529.1946981018641	108.04232947891754	164.34945928431677
1144.1844917213914	509.8792210350398	138.92118848541043	138.98050398082881
1101.2800268546607	510.9539544095783	154.70764492534136	136.83103723175194
1071.9274034010766	569.4812842682618	144.57786114347334	129.91242661684237
1079.9480183697208	557.2795034040463	176.069160360919	111.1045982046061
1188.8869137246977	478.0474567828476	155.9009047259546	125.77993866519299
1344.7512411010007	446.04510775876633	149.81284591141846	149.918472025781
1378.0846368969235	577.6947864446374	168.10926123481738	136.78855723781356
1356.6361031477852	509.27865921191665	139.0782875154308	177.71675674637112
1180.1353805065826	616.6925214781883	158.44566825945043	157.09393545258965
1204.5389382516364	745.6860535154617	154.36059873645883	147.5626823064668
1203.268534154225	746.3762366589932	147.39261486103007	146.1823160194038
