# Supplementary material
Source: ML conference proceedings conference paper supplement (https://proceedings.neurips.cc/paper_files/paper/2022/hash/1c8c87c36dc1e49e63555f95fa56b153-Abstract.html)
Supplement: Supplementary file 1 [file 1c8c87c36dc1e49e63555f95fa56b153-Supplemental-Conference.zip › GOT-10k-Results/VLT_SCAR/GOT-10k_Test_000085/GOT-10k_Test_000085_001.txt]

537.5	215.5	264.0	131.0
525.4855458208768	228.64495294004237	262.5021695794801	134.36851759337293
520.360328367243	249.863638871629	260.4166864333224	141.27481794390067
517.4056927007396	273.3069679164714	266.32595776632934	144.43537318317348
508.99744993848617	297.7102169845872	283.14244329083607	146.80555495389416
496.22114758426267	308.5806613119935	308.69504799928313	151.80542434316527
495.90217763478637	314.51906709641264	323.62495236338793	168.5125417046315
518.1692360258626	287.67214466949235	332.66431725019083	183.93961393778966
532.3034645375951	249.5478179912403	336.59893970650216	195.78210833474094
540.2098241181236	224.55423583743266	345.71715057871114	204.21772258691274
539.0772443622259	215.06167880768754	347.9823100905067	206.02599031071767
536.3918735496328	220.41597746215504	344.70041052505275	195.3173930017827
509.97949848592634	253.99453726118713	346.99028301263166	178.69515104355276
509.887162176464	287.70598949605085	339.00319355050027	168.4745811412173
506.44633431824815	308.0984986042555	338.00668201657334	159.20223192624323
505.299826513448	306.33653797808154	340.2996976261736	155.02370828569627
504.18700782281087	298.1682364422953	342.52533500744795	148.37211567610586
514.5763808238528	298.83146343370225	344.4805944903584	147.04566169329198
510.1829051758561	301.3311588335574	353.26754578635166	149.62912258282304
514.5247773373467	288.7152891421948	360.0950259522411	159.34963747667774
517.1394467646331	256.155498488019	362.89174795142026	168.28679280876494
525.6290072326377	222.0288160074827	362.3595704416625	170.75238406483174
538.2333037195675	203.9396540680766	361.9273421985815	165.6367667256798
566.8170232720228	199.49207619977614	361.9013444479269	158.20579636106484
591.9590547887485	171.31920010128934	367.84191121136206	158.32691876115183
592.2899936126282	161.2491377911515	375.3002705688927	154.10633236555734
613.5243614143737	155.55506777286297	381.75047695510136	157.34131540385104
611.6292203378626	153.68028944058588	393.8444691752177	161.09087206840525
627.0448345194267	161.68350285129986	414.2820892871487	170.7188694845068
618.808006981468	163.1238103024417	439.766527457743	176.84903767690008
622.0188685768856	160.31499465461073	452.319276770535	182.46666897256205
619.4711462811847	157.11760402789685	467.18292063374986	188.86145022598984
621.4914683869292	166.09521336653097	473.23857640970624	191.09883152361192
614.7992291092335	182.81003862909319	476.3996410177823	178.11600889311842
581.7785952957372	190.43945053368753	492.2600432152706	172.89335816983052
579.0410263097078	188.49622131193414	497.7351811873293	176.77981661333735
563.8140690148887	193.58502439698395	517.8718225404375	176.9194836797677
544.9486644491121	193.79069483048127	534.3883828692309	176.5081428127731
530.6595702357304	193.30115326671387	552.13180770399	177.4872259403079
525.8877476044445	192.86105665216238	561.6754529665617	178.36741916941088
510.6787375937496	191.48839577171924	580.8368555278291	181.11274093029718
499.6801478264364	194.79342801134257	591.2549759531505	186.08173556035564
491.40195995232216	199.9392347421721	595.9928656138775	187.60860818619807
488.03100280003525	211.1015447617727	578.9070799648882	189.11168810055997
469.21895295153115	214.78714819948132	569.7357153774565	193.4393472962526
463.5400988972483	207.6916727503674	557.7983332102865	195.98275305661264
454.8861813523153	172.93704829469604	552.0589191481478	196.35025451194116
452.8180568572567	171.22634190026127	544.7468352554026	199.7716673008107
444.6771317432777	182.22524801036872	549.6229804627261	200.58526512186464
440.05194557258955	219.79058898183797	558.8733528041024	205.88590759479848
413.9999721764011	226.04987742698648	564.103932434931	205.0856724948885
412.7840849329946	254.41263464946135	566.5357069217441	207.25385452579138
413.8363223481928	253.98757240819629	564.4312320913476	208.1039790083215
420.53841103370166	253.04912919810164	562.8650121947821	209.9808654285108
425.41216422079196	252.6863976871688	553.1175058206015	210.70632845037647
430.6758135525911	260.42990129186023	542.5902071570033	206.9419880834949
433.90332564799064	260.8118726128857	524.6312100649443	206.17804544144408
429.16819365167106	260.00963003503534	500.40450771753206	207.78253059714467
425.77728552252114	250.53366243111293	485.3624390645599	204.91058089371745
428.42353957487956	249.94689183529664	469.42615426912903	206.08412208535003
418.45915195232755	248.42212798539322	437.18537823562303	209.13364978515685
443.5021758981798	252.90214731528727	417.1551302055017	210.1922110792299
455.6571485506705	250.33408706920054	392.84518490052034	215.32833157140334
399.6239554749667	248.94892363822004	362.78672732616815	218.09865843336433
481.46129086363595	245.2963470361838	380.6436730146735	216.32723081414468
476.9732659737326	245.11864714013026	380.3080636232312	216.68263060625173
486.4140270637949	254.04155631695997	389.3647260259421	217.46226864114936
402.12276844474013	256.5782617552162	349.8275651911601	221.84884313158648
419.8121390322988	251.10690792197028	314.44882401604286	232.79155079807833
429.28769442600543	256.55321588594023	295.49771322862955	230.49287460555198
436.38909684783914	258.83755930748777	281.2949083849621	225.92418776245688
440.190297282806	254.61449498707327	273.69250751502835	234.37031640328587
442.78002769246734	252.005215259432	268.51304669570567	239.58887585856843
442.80184840737513	265.15836920633126	268.4694052658901	237.27765760079797
441.66314878815973	267.36856292466143	270.74680450432095	240.81800305158723
443.13444649731116	270.28864177849607	267.80420908601815	243.03053652225964
442.0024316398693	264.20214358352985	270.0682388009018	255.2035329121922
441.8333619044822	261.7130989816187	270.406378271676	260.1816221160144
443.4046533780538	260.75361717935766	267.2637953245328	270.455914384329
423.98897045450093	260.3850032789619	272.2232026839621	271.1931421851204
419.7559606248909	258.9449110452928	272.1314884722285	274.0733266524586
417.6229904980954	249.4037995057806	267.7957916835505	275.952275646945
414.4080459271966	260.19489297867733	274.22568082534815	262.93280953918185
441.06949306216643	271.09340846829946	263.19639386215	258.05322148263417
453.271723446858	281.62050442404257	255.20904401695446	253.41614049533558
446.47620249627516	283.61801914682826	268.80008591812015	257.4309440342315
445.40793254103016	292.0011502537945	270.9366258286102	257.237920418174
450.7164391750482	294.90580400623185	276.9536325061672	251.42861291329933
465.06830760824977	295.112247123549	289.84265867311876	251.01572667866492
428.7238150101535	264.3960837185645	285.92394696844565	261.37625555472346
424.69609053861967	267.86583867978936	302.5961291014038	263.05347882216427
418.1790256009634	274.5499509668425	315.6302589767163	258.58767890489236
405.7426568782354	278.1639443048574	331.4713558381707	260.3913328128644
471.68103518357714	306.30084539711766	329.84854365607475	269.2445028426378
406.37738514352566	299.25427162434346	328.54140146090907	264.49273006314775
373.01337364842044	300.3393791050105	329.99097076411056	262.32251510181374
372.6665915709832	304.5023127367289	339.9970759292107	263.3091888486026
343.66804572285895	300.71077482271374	350.58577933797403	261.41058701913596
339.77028704374817	295.410518859817	358.3812966961956	262.39897345343365
307.0447655891595	265.49610621259785	365.35147871480194	254.0001277088724
309.18565015785856	260.9108018620534	370.7837897370407	253.45665625032444
313.612799775651	262.301727163806	371.7165432865378	250.67480564681932
316.6616390036174	268.18066008061953	365.61886483060505	248.6719297057765
323.18382197859165	267.36602751322755	352.5744988806565	250.3011948405604
319.157343965241	275.6989614350272	351.1675644791203	243.0952174251987
327.4313300577902	306.1731539701025	343.93929204769415	247.3847306307539
330.55477348891407	306.0100511468519	346.97350730000096	247.71093627725503
334.9253990436964	306.86791384518165	347.56469329312927	255.32764798328856
340.08716155516817	335.60115763833846	346.70771668956615	254.6604509132576
337.6050431520388	355.3682905761035	351.67195349582494	252.8965441853975
360.320134227106	358.63778148741517	344.1975420243921	246.35756236277413
359.9849747835442	358.31270663238433	335.59974411562206	247.00771207283583
365.7977089932583	347.70679310221067	333.1226392933583	249.92281193885407
359.99223046660086	331.1416285759031	335.57517911395234	255.5778892933066
398.13636323154975	321.8370088215889	324.3040512608974	264.8989662766718
404.63544520429457	311.8762790059161	320.572877363732	275.55343585969314
414.77615686132964	305.7556110871406	319.05369588485166	278.4136507796493
421.6869428458367	300.970922019583	314.63561528610626	278.5795375444959
417.5905833487708	285.520042937001	322.8283342802381	262.7930161821682
393.4579303798731	266.58250156737563	343.4628595106724	245.40653750669702
377.65849854975795	274.88611629473866	356.5790506871588	228.7993080519709
380.8423743723623	282.6305540090723	359.3747848923392	213.3104326233037
381.14188185606537	277.9148838741379	358.7757699249331	213.7967432336133
393.91847492791806	277.7969891257044	351.11125385092254	214.0325327304804
405.38259623095803	278.77630920080674	345.8514282952454	212.07389258027573
409.4896829055358	267.6376654390218	346.3601087317313	208.18261874692115
421.25888031299485	262.2835766970997	357.4813750522353	201.56096566305436
439.86989607560116	264.9936166559048	363.84830061723176	196.14088574544417
446.79106753861674	263.3581490902966	367.4445528537947	190.69252329536363
446.36188356960815	241.8165803949788	376.98159616500465	181.7036084468424
445.70631073540164	217.1280480270583	386.9555303394902	179.10394214624884
434.0911197696254	189.43071530333077	401.42311608547357	181.9218304802893
455.3518684143801	159.6100071615711	413.03651741142494	196.4508312509246
458.7098282770936	136.1900395682484	415.7661022007255	205.50874837865922
442.4415593694922	129.49671607265753	429.0171091208052	209.25262992227943
418.96243579661734	128.3653299481822	446.27109807643023	211.51540217123008
439.14919106001616	129.14864436953724	436.4753407738436	220.14135773659035
446.5245497261173	138.37778939901494	421.72462344164126	222.08136809125276
79.46633299194525	156.8236287505642	484.76454033206517	195.20575679976497
52.886773133199824	195.61004743095577	527.4610095706357	180.40882231250353
345.61223263207796	176.50726871011634	525.6109409232561	196.99953344490922
284.96121179884653	166.32280326559217	547.17840743839	206.28684487269874
294.7376627045087	161.47586443462095	539.1835107080287	215.9807225346412
311.1570170906571	169.3279788289531	529.5785236380569	223.51021544830195
195.44166353076508	169.8486977016693	575.2137320317117	222.46877770286955
172.97827015080037	170.40206402006783	620.1405187916412	233.6130635466917
180.09288527232854	163.09234817103714	632.1031446966346	248.23249524475307
189.77448232182905	165.47796586912165	626.269990520049	243.46125984858406
194.59106746019467	170.21239262959665	616.6368202433177	233.99240632763406
200.85756949266835	170.5779223622083	604.1038161783704	233.2613468624107
202.2641460183088	172.9854975743982	601.2906631270895	228.4461964380309
201.15840557814016	168.81215686163463	603.5021440074268	236.7928778635581
205.7335332372018	165.47055914780128	594.3518886893035	243.4760732912248
220.237437853414	164.23306636351816	578.2457183853406	245.951058859791
244.8399177004177	161.90158855434603	554.4667910648818	250.6140144781353
252.9022073536887	164.12104723069604	538.3422117583398	246.1750971254353
253.07845107030926	167.29168008035143	550.1282494100562	239.8338314261245
263.1314880217386	188.15878894474037	554.4182995350254	234.69379973908838
280.23646584929486	195.2928558364659	532.3776291432323	232.59495121895668
324.1346219757709	197.34381644078115	491.834466057653	228.49303001032615
386.67025046639003	230.27419132169922	433.67889619220983	229.54796736428486
405.8400652825268	227.31870156606408	395.3392665599363	235.45894687555517
437.10183737742193	227.69347813422397	372.23067415404057	234.7093937392354
471.5383459534467	232.58765657892036	350.840532605274	234.41761197049914
461.26903509231425	231.97048348942278	343.8662719938551	235.6519581494943
431.63978575949744	229.24854933650988	348.6063306318141	241.0958264553201
406.3071114609366	222.5853065361787	362.27974394070213	254.42231205598245
419.7611198925478	234.39424061458135	364.39564423948	250.1537220071773
396.6328507335903	210.6321550474554	372.1079950719809	268.7697525273687
391.59389022453786	167.68072754325902	382.18591609008575	284.25464614629834
379.57804526808866	161.02873616297384	395.75084548583203	287.09186838971647
358.8194193941499	151.2398573498839	415.8294214823454	285.2309502645322
336.5864104656291	151.11758082837534	438.3107890561746	274.4831781659431
327.80085552134324	155.55999597936503	455.8818989447463	254.44761425635812
322.56787850015223	163.4383539661511	466.34785298712836	238.69089828278595
319.42110573207077	160.71201800650925	472.6413985232913	233.1862587470522
320.2021275203847	161.6901180286431	471.0793549466635	231.2300587027845
341.0589516846483	159.3726518187489	462.0583670993889	235.86499112257292
337.950264464061	151.9265563265192	457.430089820655	250.7571821070323
350.62231548037414	158.47903193127598	443.1191758694402	270.75179514175295
363.9606991088827	148.1453600063967	427.6022434905127	291.41913899151155
369.7992431512986	139.74084702047742	415.9251554056809	308.2281649633501
374.52784561529086	132.74819572605747	406.4679504776964	322.21346755218997
376.0025669817269	119.64651630360063	403.51850774482426	325.50461700535374
376.39435974717384	99.72373326906796	402.7349222139304	308.0290154819859
374.7516928950214	113.23903913096831	406.02025591823536	280.9984037581852
371.4531383307939	141.86872033246115	412.6173650466904	245.28766672592332
376.7600508799534	166.4917352468862	412.2801317341073	206.31822868280926
375.60612992665915	177.93725345077422	414.58797364069574	183.42719227503326
376.80756585490985	185.66651664802686	412.1851017841944	167.96866588052796
375.1839570149847	190.4307484951392	406.5007004672337	158.44020218630328
467.93075947960904	212.70512133391685	359.88145618687304	157.28969421152559
484.7171386195938	206.7320927472299	326.30869790690355	161.24907478494617
491.6479172502816	203.122010482217	312.447140645528	168.46923931497196
500.274292875049	225.32083636915596	302.68254368847556	169.00051329598847
499.38082013142423	223.96593518956712	304.46948917572513	171.71031565516617
505.6220478576697	220.4646480147677	306.83838620237685	171.28721376519366
543.8735214041474	224.90443641287322	319.77749349074077	162.40763696898262
599.972117867955	229.613074190494	304.97215460937133	152.99036141374108
594.818814395989	232.90482769468989	336.6148479194661	146.4068544053493
562.4066202448613	232.99244694262595	364.1505383610683	146.23161590947717
552.1931396545734	233.30611112604072	376.72528122080917	145.60428754264765
549.7453601312317	234.644643410083	373.59901576847005	142.92722297456308
559.0686551646452	234.97192762564174	354.95242570164305	142.27265454344558
577.6418758898042	243.88861644005368	310.15683919514674	139.7375670269788
600.1573724889558	250.04654640093383	265.1258459968433	141.33513685773048
634.8849927835787	249.36945581913872	227.30215412462695	142.68931802132073
661.9573959256106	249.03632954204477	196.31103382334626	143.35557057550864
665.8012441448847	252.51619493635866	188.62333738479805	141.72864347554423
669.3451647197685	252.84517570294202	186.72476900156832	141.07068194237752
