# Supplementary material
Source: ML conference proceedings conference paper supplement (https://proceedings.neurips.cc/paper_files/paper/2022/hash/1c8c87c36dc1e49e63555f95fa56b153-Abstract.html)
Supplement: Supplementary file 1 [file 1c8c87c36dc1e49e63555f95fa56b153-Supplemental-Conference.zip › GOT-10k-Results/VLT_SCAR/GOT-10k_Test_000085/GOT-10k_Test_000085_time.txt]

0.019023
0.019877
0.019772
0.019732
0.020006
0.020163
0.020348
0.020735
0.020795
0.021001
0.021198
0.021037
0.020919
0.020737
0.020400
0.020343
0.020276
0.020488
0.020606
0.020807
0.021011
0.021204
0.021072
0.020919
0.021132
0.021147
0.021244
0.021595
0.021856
0.022428
0.023247
0.023538
0.023958
0.023789
0.023733
0.024195
0.025475
0.024972
0.025115
0.025384
0.025418
0.025718
0.025816
0.025503
0.025105
0.024660
0.024377
0.024787
0.024707
0.024752
0.024533
0.024585
0.024913
0.025173
0.025461
0.025937
0.024872
0.024223
0.023638
0.023739
0.023242
0.022954
0.023007
0.022784
0.023381
0.023744
0.023668
0.023263
0.022994
0.023031
0.022248
0.023141
0.020949
0.021231
0.021282
0.021307
0.021221
0.021210
0.021827
0.021356
0.021491
0.021542
0.021682
0.022397
0.023440
0.023571
0.023670
0.023582
0.023176
0.022907
0.022456
0.022575
0.022724
0.023063
0.023198
0.023174
0.023336
0.022353
0.022867
0.023132
0.023444
0.023889
0.024741
0.025307
0.025491
0.030955
0.029944
0.032332
0.032515
0.032972
0.033012
0.033041
0.032290
0.031953
0.031424
0.031407
0.031830
0.032126
0.032438
0.032351
0.031561
0.032446
0.032663
0.032586
0.033110
0.033222
0.032890
0.033529
0.034114
0.034616
0.036240
0.035271
0.034088
0.033540
0.033858
0.033820
0.033649
0.033391
0.033157
0.032210
0.024990
0.023398
0.022542
0.022385
0.021222
0.020383
0.020550
0.020493
0.020769
0.025917
0.025807
0.026174
0.026727
0.026283
0.025745
0.024958
0.024495
0.025620
0.026370
0.025385
0.023848
0.022691
0.022408
0.022218
0.022275
0.022043
0.022200
0.023049
0.022539
0.022823
0.023106
0.023216
0.023299
0.023340
0.023381
0.023362
0.023684
0.023984
0.023707
0.023776
0.023705
0.023952
0.023923
0.024200
0.024833
0.022532
0.021201
0.020836
0.020245
0.020546
0.020276
0.020267
0.020001
0.020480
0.020459
0.020423
0.020929
0.020754
0.021358
0.021989
0.022442
0.021353
0.021229
0.020850
0.020558
0.020106
0.019606
0.019266
0.019347
0.019387
