# Supplementary material
Source: ML conference proceedings conference paper supplement (https://proceedings.neurips.cc/paper_files/paper/2022/hash/1c8c87c36dc1e49e63555f95fa56b153-Abstract.html)
Supplement: Supplementary file 1 [file 1c8c87c36dc1e49e63555f95fa56b153-Supplemental-Conference.zip › GOT-10k-Results/VLT_SCAR/GOT-10k_Test_000086/GOT-10k_Test_000086_001.txt]

497.5	156.5	452.0	188.0
490.02152033146666	158.0951000410579	456.094918852477	183.80979991788425
487.058332236292	164.72228506157128	462.0212950428263	180.40195822722518
479.21583619556213	171.3247854185951	467.83539543568986	177.06784920177364
476.2166812947214	179.44269896780514	473.8337052373713	170.7265461778529
474.30914704258475	177.00048516881407	477.6487737416446	165.74499316700974
463.31208282115995	172.22262650335028	470.1528013248687	165.47067687806214
456.8244581432704	165.7023201995904	463.6919068481799	168.79321756934792
452.41251560470715	159.67859185739772	462.82984198571774	171.15472431414457
453.53321979837216	172.4320496155751	460.5884335983877	174.7966048433662
453.9178559692507	199.78193005484965	459.8191612566307	168.84551740514115
456.0092624292712	194.94333540555164	465.26782254958636	168.89123249074055
455.5530832247785	190.83579818423362	475.8904475245532	167.39604036739502
453.91650064854724	186.95811998535407	479.16361267701575	165.31643518593637
446.1248498284508	182.5609716294781	475.0592415638724	164.26689552102013
428.2803410528644	177.16028251377747	471.6834932774575	165.30208229302445
420.2812603236823	175.16740744496187	477.9447953366466	169.28783243065567
415.497375675514	178.17364253625743	477.6139178091672	173.17400907188065
412.1345947724382	172.37750175430395	474.37514354260463	184.76629063578758
416.9683919169154	173.51292011105784	464.70754925365037	182.4954539222798
410.51964523967973	175.46742030698493	467.65805919998627	178.5864535304256
412.95501321219416	180.72615477538872	462.7873232549574	177.98826163499137
420.89600583434503	183.6681729732453	456.743960531283	181.94284775990533
446.6435746508793	182.261628650396	464.1841540992149	184.75593640560396
468.5695417755704	182.1060001806027	470.2315672882685	185.06719334519056
469.84135630980893	177.70821244878186	487.83278627061577	183.79034478342007
477.65213780130347	177.20049878380286	503.1179321565411	184.8057721133781
481.6010210088651	188.38983831241848	526.8387278583883	183.50613446746058
481.2876082678501	206.18884698139118	538.3205117075019	180.47299223076587
484.66769389511217	211.60311724921684	542.523621758513	180.60773300064977
483.46743078976255	211.58959712995437	544.9241479692122	180.6347732391747
478.69547243100396	211.16420026709196	543.4078435412273	181.48556696489953
478.62481207448656	209.4424167075387	543.5491642542621	184.92913408400602
481.3261194964672	209.8571767191431	538.1465494103008	184.09961406079725
499.2716418461143	204.99609105182031	535.3365676791951	182.79476440604662
509.5523550014972	178.15097642675735	536.7014956357011	181.6691079879932
529.6266048700134	171.45135961838258	540.4013222894528	184.10626000704679
523.7995373308279	164.29574373177383	552.0554573678237	187.35821654562153
521.086505394673	156.1389750650996	568.7661870311456	192.38708808795775
519.8769294178863	148.31455186626076	582.7998618855725	196.42141158478194
522.1319984337802	140.96518738703338	602.0658870681452	199.2320589360564
531.3961578719582	143.97520005005546	620.178694923119	205.42574252045546
526.5566748302862	161.58949771605677	642.4424733788317	207.95158430555912
521.909057339789	171.9376724498404	664.6853723918787	213.1505629020973
513.172067806126	177.6728280932315	695.5185190597805	215.03941921589092
500.498740062106	177.50388190533897	720.8651745478205	215.37731159167595
496.82366973959455	179.35502982944334	742.4118882503768	211.6750157434672
467.61412934308873	182.67113105144188	757.534613262716	205.04281329947014
456.60771352223685	182.00538175520484	765.0263977338645	206.37431189194422
452.8190345614038	180.52690400645935	772.6037556555307	209.3312673894352
431.8256367559421	173.52824823086183	784.9628589542021	208.51473278450433
429.5907121458826	157.28980811176595	789.4327081743212	211.04674683134607
419.55521900760766	124.2885175330095	779.3376577983745	216.71725468386597
389.0199465581627	115.38267384219859	765.1715821723296	219.48161796050084
393.2840078988187	109.4157098054004	741.7443107248437	216.5163972679231
391.2297346914032	110.80138731389158	731.3398905298623	213.74504225094074
394.47807439540793	112.17388238794928	724.8432111218528	211.00005210282535
402.27868344303386	129.61324514877498	723.4134182426585	204.4641770132891
411.586319247053	164.45441932555448	718.8274221823376	204.92820639831706
424.55670478730065	162.80659841057528	720.8331090431432	208.22384822827547
431.7488385337509	154.6710300172277	720.5118845202871	210.4319420449262
428.57447663844226	145.80140513863046	712.7609653764179	214.07154886763396
438.5814153959392	138.50235536230895	706.8047596197839	214.61197666191705
448.09076097696084	135.73114908822907	701.7694458156591	220.1543892100768
461.53910860658675	134.415339553788	702.9016859769417	222.786008278959
466.56437130598556	133.46755627022975	706.9301996746899	224.6815748460755
485.4688026921958	143.39922734770704	711.6347108272939	218.98935733279572
516.4443455741522	141.638906502945	734.4804600525786	208.37719319078695
517.8916672978662	138.2604104921738	745.8443907251755	200.87561109230438
515.8627255064578	125.00725507620453	749.9022743079922	198.82572466502654
525.8697554854359	125.91663316465835	744.1848206124168	197.0069684881189
535.1155932743021	132.82367055952204	739.875041626367	197.374790290074
536.7031678259159	132.69751649725848	736.6998925231394	197.62709841460116
539.7398970031177	128.99593040653127	730.6264341687358	205.03027059605557
549.6545938888793	126.57370940453325	724.9386555115118	209.87471260005162
553.3243042259464	139.89114851470367	717.5992348373775	211.54344709138016
558.760695314133	144.81291865962208	692.6472984781512	215.77906098439632
563.2384679922588	140.8863466250518	669.8873874619427	223.6322050535369
569.6985395407792	130.7882182073942	656.9672443649021	230.20308029108932
573.2236277951251	119.01198349605747	649.91706785621	240.1944986016942
570.0950780312534	111.47213484935386	656.1741673839535	241.63299635269323
564.1486898654786	113.60441067113695	668.0669437155032	237.36844470912706
558.8456435876756	115.30482472770146	678.6730362711091	233.96761659599804
563.3515734775973	122.17662128416632	683.6003838775921	234.16323086939474
563.1870096345209	136.3415921098056	683.9295115637449	233.85932803800137
550.6030079750008	135.13418476302365	695.0853454593218	236.27414273156523
545.7114631630195	151.32648480443243	704.8684350832842	232.31992699981004
541.5737353502452	160.16573316576523	713.1438907088329	228.92357089676204
539.8879251097436	166.43556891654953	716.5155111898362	230.7213017662093
538.3912862352735	169.07089795858278	719.5087889387764	225.4506436821428
539.9508450769401	172.01203364871623	716.389671255443	219.56837230187594
541.0199906493963	171.1195257769748	714.2513801105308	221.3533880453588
532.9068543513363	169.21818368034062	716.2640690860271	225.15607223862713
528.8878490100581	175.07550504981074	724.3020797685836	227.75374023343085
523.4151321188117	187.78426327964726	735.2475135510763	231.2846906638228
520.2088089227317	193.18615392187874	741.6601599432363	235.17551790224144
516.5692171508192	191.87144210694564	748.9393434870614	237.80494153210765
506.9568088106038	198.02525904047866	753.1551237689296	240.50634406360416
506.86311392461295	205.3146602106283	753.3425135409112	241.0461516217224
507.9584853158741	210.78200919949953	751.1517707583889	245.24265636391448
517.108297785527	212.01811744433812	748.0293257481469	242.7704398742373
526.6961336010451	208.55346001513098	743.941078191822	249.69975473265157
536.0728357540524	207.89050191959203	740.3439043969252	251.02567092372948
520.157329694213	207.32193755351594	741.9164674782801	252.16279965588166
498.3409031926508	205.536582297846	740.032168709009	255.73351016722154
491.75318639342777	218.9200200651141	737.9969848269905	259.3878695936148
502.86522365582664	237.76193631480365	746.2690027984872	252.20012959053037
494.8538285152434	250.48859163920676	747.0567255087502	241.98188651262768
493.6582419646029	259.3535265051467	749.4478986100312	239.31113913413526
486.8703636929631	263.8756928074563	747.9796722157791	245.31078946704787
494.92760242018545	265.25703561808666	746.9985281389528	257.68143722340557
493.44907651563284	273.3403055405322	734.6101431624614	256.860334164111
408.87593167958187	273.76852934296625	706.7574524576248	256.0038865592429
417.1354894452747	229.1362694190728	660.7577073160161	242.08620277124885
395.7457290403157	229.48509224887457	606.7233591136121	241.3885571116453
363.80094313672714	236.7436698106262	566.2719213499656	226.87140198814205
310.76569693322085	243.8595015944909	525.9280145943721	212.63973842041264
303.53748035015417	240.89774321436155	517.6516869551226	195.83049437528842
258.88680617809405	204.56159070822721	541.2742548318693	191.87755550895469
251.571032213479	204.89648607831157	555.9058027610994	191.20776476878598
237.85865745094634	214.66716675236466	560.511061946278	183.0761485906231
239.333371668086	226.04172848862092	546.2350030965817	171.65365553352768
242.39562874288873	233.30007852116242	529.1966789802809	168.05076543514002
309.67569147483164	233.29282022078056	500.6931335359641	168.06528203590375
359.19307832033235	229.7908373966066	462.8628971011257	175.06924768425165
389.82503899500904	227.17314285404422	430.96075763998545	180.3046367693764
398.9460147013393	226.72772343290802	412.7188062273248	181.19547561164882
397.6590423425703	223.42188184207166	396.94555996182265	178.63356330180142
363.9247289380837	224.3250619707245	366.5169803088523	176.82720304449572
354.2227997541946	215.42877558145796	335.36945017009293	177.76931298751632
335.34120643937376	204.69559887318965	341.1923403690101	175.28044408100953
306.24156659619354	193.0308250241983	367.2803096659609	174.5265089869349
293.73119956491263	171.38016096738872	392.3010437285227	175.846252087727
278.9494682663334	165.65819245554368	413.08113891515325	178.50682170088913
265.42392769408895	166.7607509522045	431.00080526875365	176.3017047075675
247.13542555802917	188.75416309080822	448.8754475836705	169.71960434476537
238.03689049175904	195.96962880964898	457.58208648422135	164.77910413907324
229.30991494091816	204.01755327589737	465.51010481682687	158.2091879756527
222.62886518998198	207.4185850609004	478.87220431869923	151.40712440564664
215.02251238587286	206.06595368976923	494.0849099269175	144.527491829783
209.06663764438403	206.55049606993109	496.32374974627913	143.5584070694593
216.10984697086337	206.9167442293654	491.92382132281705	142.82591075059065
227.11197349662493	210.82717163369904	479.530253788225	144.61574145885444
234.65632295041956	232.2968199152571	464.44155488063575	149.01992898176326
234.056866869669	237.08327844991518	456.3043638583833	148.78311509620067
231.217567897142	250.28171075849477	452.7668170175801	150.03468483661294
221.16741214994533	249.7679219303464	454.48956130555234	151.06226249290967
220.96128260685657	240.76175947022335	445.66971264343033	150.61037191655672
218.5394643829748	224.93213600655304	441.41506191240137	154.97475730752004
198.54556140916492	217.7567421470244	435.81722600151454	160.20841665487595
