# Supplementary material
Source: ML conference proceedings conference paper supplement (https://proceedings.neurips.cc/paper_files/paper/2022/hash/1c8c87c36dc1e49e63555f95fa56b153-Abstract.html)
Supplement: Supplementary file 1 [file 1c8c87c36dc1e49e63555f95fa56b153-Supplemental-Conference.zip › GOT-10k-Results/VLT_SCAR/GOT-10k_Test_000086/GOT-10k_Test_000086_time.txt]

0.019755
0.022250
0.022035
0.022162
0.021980
0.022207
0.022159
0.021817
0.021759
0.021744
0.021786
0.022122
0.021869
0.022167
0.022137
0.021929
0.021827
0.022255
0.022000
0.022005
0.022451
0.022783
0.022160
0.021798
0.022217
0.022603
0.022866
0.023491
0.023638
0.023612
0.024054
0.024108
0.024532
0.023894
0.023721
0.023596
0.023647
0.024087
0.024357
0.024897
0.025385
0.025909
0.026895
0.027159
0.027595
0.028206
0.028538
0.030124
0.029436
0.028734
0.029154
0.028826
0.029473
0.029557
0.029327
0.028496
0.027467
0.027618
0.027651
0.027636
0.028151
0.028774
0.027945
0.028918
0.028299
0.028366
0.028333
0.027866
0.028730
0.029059
0.028249
0.028130
0.027812
0.028107
0.027905
0.027488
0.027621
0.027261
0.027190
0.027180
0.026730
0.026968
0.027128
0.025920
0.026687
0.027429
0.028066
0.028389
0.028283
0.027661
0.027663
0.027428
0.026699
0.027892
0.026295
0.024500
0.024888
0.022036
0.021240
0.021078
0.021112
0.022282
0.021813
0.021105
0.022794
0.022996
0.022091
0.020859
0.020401
0.020353
0.020980
0.021376
0.021227
0.021261
0.021154
0.021116
0.021596
0.022503
0.023148
0.024146
0.024201
0.023752
0.023407
0.021767
0.020609
0.019970
0.020168
0.020285
0.020556
0.020233
0.020525
0.020873
0.022126
0.022392
0.022336
0.022170
0.022314
0.022233
0.022506
0.022742
0.022994
0.022661
0.022398
0.022273
0.022049
0.022420
0.023031
0.022557
0.022069
0.022338
