# Supplementary material
Source: ML conference proceedings conference paper supplement (https://proceedings.neurips.cc/paper_files/paper/2022/hash/1c8c87c36dc1e49e63555f95fa56b153-Abstract.html)
Supplement: Supplementary file 1 [file 1c8c87c36dc1e49e63555f95fa56b153-Supplemental-Conference.zip › GOT-10k-Results/VLT_SCAR/GOT-10k_Test_000087/GOT-10k_Test_000087_001.txt]

534.5	270.5	14.0	21.0
534.1851148956304	270.61797659398553	13.629770208739334	20.312465084449848
536.0249246546674	271.0198893222399	13.673640313087967	19.508639627941065
537.4954128579205	271.1340867774136	13.855855039462494	19.280244717593774
537.3975437982014	271.25644268303455	14.051593158901014	19.035532906351833
539.3439444275169	271.1728476805896	13.79583214208811	19.202722911241775
539.8834638791338	270.96760995364	13.2347086268284	19.613198365140853
541.4546936625657	270.5400532426482	14.211016490662276	19.43861992945014
541.1884064730389	270.37638637560775	14.743590869716023	20.29426810023816
543.2635910065244	270.5459117430072	14.443527061754502	19.955217365439196
543.5964462842678	270.6861470421505	14.317787764005807	19.674746767152694
543.5943011344071	269.9952583603121	14.322078063726964	20.522873054640968
541.4291302245383	269.17391439902303	14.826479481320547	20.525872233442954
539.896746209536	270.1865839314137	15.116656188057753	20.72020622727573
537.9180678053272	269.6382799856685	15.135584671264677	21.254181500878914
536.2604054777979	270.22811325720727	15.595717194270872	20.645553384211738
531.7792706442626	270.3776047328437	16.017858879303834	20.346570432938933
527.2266307939911	270.4328921089308	16.548344269717685	20.235995680764724
522.7748773128108	270.12763341957486	16.195007203602557	21.42506581125629
515.5023610593274	269.9365652134513	17.146831225564057	21.807202223503538
508.11201318752234	269.1496108632959	17.231107511590984	23.38111092381427
498.3261464953445	266.96351396411865	17.67104368556197	23.926945280091783
490.8932922135353	265.3942223200136	17.512420776615603	24.452601355681843
480.5612456027722	263.8874728997861	17.759813895800264	23.514480821490217
470.98473337026667	262.1865836592335	18.109019357299307	23.674221543369214
460.5926023122029	259.45094175127514	18.540447378559637	23.893161076739595
450.3084745595574	257.5447522416444	19.101243077854733	24.37096346166842
440.2093357909828	255.4159351091465	19.482572319442017	25.895225547966035
432.04458869273606	255.39954723545583	19.41709458394353	25.215176428739042
423.55151250123123	252.26782354946022	20.27136590245531	25.867534734817923
416.4740368285937	249.0622570059728	20.646386868039716	27.20185136611725
409.64563796751173	250.17207770144964	21.523511021461672	27.237446487294562
403.61977654582034	247.70792621934984	21.310115419095865	26.79976013147909
397.60226300015546	247.25956281527348	21.999116224096706	26.940085187209963
393.67489346583625	247.0383615632074	22.926434004058216	27.38248769134213
388.754367311361	246.81197982207513	23.269616467677615	27.835251173606665
385.33142720188545	246.62534145900267	23.683514792459473	28.20852789975155
378.8705753209405	246.14394185793716	24.35891234354871	29.987747515935972
375.3439825464163	246.0691999460645	24.5744617773779	30.99193585408365
368.44104771431296	245.89838882493942	26.14991503660853	32.20715926811776
364.2087531395477	246.0286687051001	27.27233959702336	31.9465995077964
358.58209573386137	247.6610605178478	27.343392492176207	33.34109168072594
353.1569065509604	247.28473693789414	28.648835157903484	34.09373884063322
347.78348325771043	247.194815149946	29.52426734126996	34.273582416529536
340.63802655571254	246.47946772156735	30.763254410652817	35.70427727328686
335.6757470111533	245.72623424013094	32.31973753474452	37.21074423615967
329.86165306416603	245.94667486076509	34.099308733183676	36.76986299489137
321.2321020625064	247.12554990482928	34.620633254474086	38.875520235304
312.6468442557807	246.79137560138844	35.59406246103316	40.70080358553512
302.490389950038	249.86453503253574	36.69383669079893	41.75941011638545
287.7286425632245	254.21911679336824	37.81600716442807	41.69412790341538
275.53202417966077	259.3751373211469	38.42588560193468	41.396132460330044
260.87276791148827	263.7960845672017	38.83749062348063	43.86563656096783
246.10966542569784	271.6606110177689	39.72388564396936	45.06010772184259
234.1243516033771	280.152644728189	41.00767840515217	45.42479638835306
217.69255663750167	289.507921921361	42.57523962914522	47.12469550706851
207.00778786140046	299.7541103256738	42.76263047141455	47.81446540837597
195.1856802340193	309.8632249968566	43.59314645483573	48.984079132892695
186.1724812676329	314.11961067557513	44.132052700190286	50.67234459311636
178.1047124481249	319.43539694104845	45.34664845936553	51.97752556604228
172.57197860515268	323.8156685259347	44.15791949870216	50.87585530039965
172.00549765926368	326.1466239021155	45.290881390480145	50.70092383479803
176.9743502903144	325.3635182708318	45.93074762593114	52.26713509736547
186.9539356280186	326.17626054054733	47.6102329471063	50.64165055793438
199.72743642512165	326.3648546586982	45.26957581752707	50.26446232163256
212.6865819560265	320.5060620147953	43.41462675969021	51.454335482700245
230.20505946515544	320.9183443060193	44.20145426720855	50.629770900252204
253.25401910238799	321.17075614991757	42.87994761123329	50.124947212455766
275.1169091038152	321.2271804205734	43.06014587249929	50.012098671143974
298.1861654865847	322.0734123564613	42.32677809116363	49.78431689563291
320.9691697406287	323.7311291958695	41.691530776280985	47.918262610145604
348.62972535367055	327.5668129884038	39.962802344208995	47.29852434007856
373.62700678904577	328.3887418901124	39.39550636965672	47.02764617266691
399.7916303557094	333.3153733907198	38.73360908132936	45.33238577855732
424.750769061581	334.7950634554039	37.76092639137114	45.01871347198829
447.0273337343832	340.96238790307666	36.185780931173724	43.10296976098375
470.1573744223927	344.43414421124993	34.834017144896116	43.64417674292751
492.06576003766736	345.2734385059985	35.43867489949029	41.96558815343032
511.5473614826366	345.31103396139446	34.229779753087364	43.108278137591164
532.3288443941709	344.2766762530836	34.007893162429546	39.09742307885819
550.5658109558957	345.49480521591255	33.20154056536221	38.96229938070898
569.9693874642836	345.5526482175374	30.731437079976153	38.846613377459235
590.7539217366028	342.08595018119547	31.82261764102313	37.02918912077183
613.8559793032573	338.29660056405794	28.95870664200432	37.02335263154614
629.0884836405028	338.7834925055438	29.60805931490176	37.08671412682061
648.9144487996253	335.5949559610537	29.80518258100448	37.1718313866933
665.3514246958059	334.25548003496544	29.579189405072725	36.691303372763684
680.8734280231248	332.87011285052273	28.756843356331956	35.29353283049094
695.3973827110062	333.8043859084836	26.907472737009222	34.43234000184479
710.3768162412161	330.3656214736227	25.873478799913663	36.48905668434575
722.3302805762405	330.71562211238205	27.408163131830023	35.78905540682709
734.0524559324205	329.86047073002175	26.803767410535066	37.49935817154764
742.5456688833881	328.81034166789567	25.96357494527029	36.57219752642413
754.290784401079	328.71756627681305	25.042468576689192	36.757748308589406
766.091711949923	328.8348988532413	24.693017946365927	35.55423296959264
776.7635285542462	327.08384768201256	24.13747847812185	35.27668190470426
