# Supplementary material
Source: ML conference proceedings conference paper supplement (https://proceedings.neurips.cc/paper_files/paper/2022/hash/1c8c87c36dc1e49e63555f95fa56b153-Abstract.html)
Supplement: Supplementary file 1 [file 1c8c87c36dc1e49e63555f95fa56b153-Supplemental-Conference.zip › GOT-10k-Results/VLT_SCAR/GOT-10k_Test_000088/GOT-10k_Test_000088_001.txt]

725.5	346.5	34.0	61.0
726.0191327347521	341.31462574971704	36.40437535258736	58.5237063083216
727.7845656301542	334.91187505194375	37.32775948027904	57.966457948379826
729.7562924628673	325.42668630555676	37.85991992043172	59.034379018838514
730.6011727501601	313.6574568270067	37.686917633770946	59.821463657070154
734.3952321451683	302.47490053033164	37.72700936113508	59.301944698278746
734.3966138332329	291.0110767963904	37.724245985005886	59.451460062006504
734.8865626896004	280.0908936906398	38.26508144986815	60.00156178714545
734.6237315288971	268.1659040233338	38.79074377127464	60.78135613834784
734.2627792524448	257.0365156823436	39.51264832417936	62.7799590715352
733.1961601060407	249.19642624586857	40.04543132259531	62.4555850005619
732.6213936342956	242.78020768175494	41.19496426608551	62.45189937508126
730.466289896425	235.16459426400786	42.25791267527282	63.070460411083474
728.7890651923057	228.02727960848384	42.31116362963181	64.14029590661272
727.2858822747821	223.03787271337237	41.98239746642937	64.1137137020866
725.1150204653535	222.54033546612374	43.00073627200504	63.4470957899431
722.6704789598494	222.39715369982179	44.55262932743565	62.06486434475823
721.2216862684245	221.9869802486369	45.776870917094286	62.885211247128
715.748840034407	220.59818846500355	46.487143987887805	63.95689158152109
714.5663392569979	219.26830826436196	47.11831752888021	64.88282396897864
708.5240604986017	219.82896260801942	48.65342159816203	67.27799976416725
707.0686064501768	219.72350281328912	49.74453745285698	67.48891935362786
700.9431686986651	221.11639974002222	50.95000327872638	68.38492872587965
699.65402448529	221.91162896996084	51.65402242862701	68.66873954285192
696.5719916689316	222.13165799717754	52.1477747875394	70.11878591302008
689.9165322148573	226.30283547581368	53.93718790589919	73.29793674553667
689.9807412694262	228.30084848364055	53.80876979676147	75.29559591126761
686.4569823030206	231.71654393335697	54.778023971022435	76.56855668990151
684.5461872088163	236.53067762713897	56.53829263700533	79.30821843689355
681.2835855874546	236.65053164555871	56.66812906842577	81.20029933715502
679.5671504734075	242.28916658294833	57.93845298801568	82.89830731340133
674.4346841372142	246.64486865290306	59.36667822875107	85.23278746305589
672.8214057659919	252.59253225984094	60.32520450426439	86.94564305076662
667.0513690561678	259.4515666088943	62.626340548513376	89.39571475960852
664.259530738672	267.33428794822237	63.44051526990026	90.32352877856924
662.653016565857	275.87277336979605	64.24133238766748	90.13203653046172
656.9394436256327	282.08439362179206	65.97842287088731	94.66639297161981
656.2488132604385	288.05483005797527	67.35968360127582	95.32419306678453
656.3000203934525	292.1397461717807	69.80974010290348	97.36424390979714
659.1721999688822	299.7136741024637	71.9364978096935	100.58232738294626
659.9414716069874	307.08453554666454	73.10540707263277	104.79277226859313
661.3908430873182	312.0827856664604	75.78749095988852	108.74833914879511
662.9513026812964	318.48037008326304	78.45549915903989	113.31995247651254
661.4666297815658	320.9177882869295	81.42484495850114	114.46028208165109
659.7920649752849	326.049802918734	84.77397457106275	119.56534484802681
658.7422457315788	326.09866130820217	86.87361305847499	122.67388812791506
657.8379528942594	325.3426716744191	88.68219873311395	127.47376599828509
654.113869108332	322.75482495012056	92.7400669456955	132.6494594468821
652.6142418255382	313.07762168913155	95.73932151128307	137.86185328131984
650.5153031596561	306.99201978277404	99.93719884304736	146.36928063134238
649.9539751714894	292.5204504041701	104.92142811895849	152.14297959108393
653.9665992769781	285.4420157525791	108.98961991366039	158.23755555714664
653.5062021838681	279.7489790739027	114.10081180791843	165.43323120646096
659.4682591452106	276.99531333144625	119.71076032269991	170.9405626913739
659.4098756102023	274.77237026383204	124.38690394448331	175.38644882660225
657.5463594935073	272.30688003292903	128.1139361778732	180.31742928840833
653.296701278841	272.0174278581315	131.77349009835453	185.7360961468546
647.5097835761827	288.34005573854165	138.3652609105709	192.94735713083782
625.3986250921175	307.96608108080795	146.189045237419	200.4934198422398
620.0909182813261	342.21088588641317	151.36166280853084	208.20295493762217
614.0363130484577	374.6853434702337	157.8261544091397	216.63538501664334
603.1673620342043	393.6948389256747	167.80641062364228	225.64697736177843
619.560743033039	397.6309709725366	178.27513714511676	236.3127797762591
689.5056985536279	350.0310346962697	188.1826298245616	240.3316239771093
747.9439184117172	307.2341755717059	199.28546843444423	245.09632433609306
738.0040364622677	255.3341893827013	212.1763964911942	251.052594924016
678.9901488507032	232.25158971091574	220.87638135243526	260.7751974802912
608.0608160300595	233.0306853713928	233.89960685748184	274.3741167636007
553.8206592685403	173.27698883588545	238.40639452850513	289.9079839826003
547.4727190045853	105.36891368725892	242.79225237697239	292.76377140876815
