# Supplementary material
Source: ML conference proceedings conference paper supplement (https://proceedings.neurips.cc/paper_files/paper/2022/hash/1c8c87c36dc1e49e63555f95fa56b153-Abstract.html)
Supplement: Supplementary file 1 [file 1c8c87c36dc1e49e63555f95fa56b153-Supplemental-Conference.zip › GOT-10k-Results/VLT_SCAR/GOT-10k_Test_000089/GOT-10k_Test_000089_001.txt]

923.5	465.5	24.0	37.0
916.302848137544	467.53491589656903	23.066894309762425	36.70597134524513
906.2632783175109	470.3459063465456	23.507704428650506	36.69494173705735
899.1895580316135	469.6674316148285	23.519599033704424	37.10952146937546
895.1215941257979	462.65482384252084	25.014109035264923	37.85190139384903
894.6501897536633	459.74792680419813	25.956917779534095	38.741486565688845
893.852481630429	455.45846985735994	26.538446671436436	40.223188977402636
893.7269969828817	451.1101092619152	26.789415966531124	41.59911459029071
892.9163745469242	449.7969054074265	27.340007858458563	42.084216339292986
895.5259180536669	444.57370196420226	28.64360073536888	43.833716705213874
903.1736125798552	429.8660198781556	30.374574071109222	46.006901056320224
910.9789248524786	429.8644296015275	32.71210060992726	48.40316842078503
923.154054953977	434.22725378141894	35.06159239478515	51.120270912939915
933.4691831211492	437.7119583502074	34.70070892686977	52.25861092193455
945.0321874518554	440.2567206984298	36.098650547899084	52.61885295492131
949.2565008662789	441.901293914784	34.60530997617164	52.11182102506061
928.5593095837287	446.0357417449188	33.88156857060614	53.35346948719945
896.2176532804225	445.7596423052446	34.40059918226667	53.9056683665479
863.5944799264265	445.1536843770427	36.06836759683598	55.117584222951635
839.9205400162598	451.649711644003	37.715635085901326	57.83511517790453
811.2859933579375	451.90981863831576	39.61890632730051	58.81127475888026
799.1276076209137	449.3967898880204	39.25251881246549	59.209239949055515
777.7326756655049	447.0634624038983	38.84969831572088	60.79070317390236
765.4644328743987	446.9710401239637	38.43257666170527	62.535148186035784
751.1007318034699	447.8128842529807	37.16513138178947	64.00881228818842
731.563602501688	451.7384034393683	39.91760374591269	64.05381440224816
719.0486798902174	453.6338552902062	40.55327675793971	63.51546699536085
707.3752612394105	460.31358257537494	39.467005012028615	63.18700391703656
702.6216325359403	465.4080132135589	40.945396877002736	64.2385543994215
695.6287948302166	473.77791920515057	41.76103458217598	63.96128954908079
690.1495217507247	484.90065095355726	41.12956607015626	63.240139012702926
689.3994346678687	486.04594818775365	44.26411097269818	62.58391528113994
690.1572822613226	485.17989262182016	44.42486729236072	64.31602641300698
690.6123473100661	479.66062305478505	43.51473719487379	65.12290057895969
693.5972127119302	473.83384470521423	40.94970139635349	64.86002475987382
700.411893649064	458.40056430140066	40.565336771822416	65.92534175559373
707.4293706386927	446.9892648581769	39.851084559647234	65.43671254964714
717.5961996791432	432.25040327164277	37.62112649579988	61.99861750989065
732.3780324889581	431.0658729662347	37.64099025142896	61.25362239699537
741.476583372738	424.5780631492069	37.998977873928744	61.859182437677994
755.8981645340589	418.15559704318116	41.94324834454273	63.774970385310866
761.0978834491673	416.2093367503787	43.135496757642024	66.01153579329926
774.3276953283664	414.7131513323873	44.02606051312058	67.29451990966473
775.2665134878253	412.5395959741986	43.89190385512277	69.89815096512234
767.998129357973	404.2749982010546	44.18682507464163	73.96573035124771
767.6578101360491	397.81418033280136	41.175790298082035	72.12067320612553
766.1488165659716	391.30069109567023	40.6588172330417	71.00781085960602
773.7340175315423	390.41238162708703	39.426151930090505	69.29999563972488
794.044192506473	395.7570087249021	37.81352470724323	68.78666911201142
819.8281162542552	405.8468876652504	37.73461330493651	68.53811229967263
833.0401899524455	411.5719873733476	36.149223610493536	70.33525032451155
833.5450301668019	414.65542936095204	35.139543181780766	70.78906716530787
826.1075226106436	417.9328617114347	36.85951679961806	69.16734302477225
817.750819887907	419.43401286259535	37.07070882351257	69.46548340676668
816.9058841625314	423.9851367394088	38.76058027426399	71.97085574585
815.502441681406	437.7622688105474	39.84338154212949	73.72601440811893
827.5816160783768	431.3318022372799	42.212286265217486	74.20756258004019
862.1354710323385	392.6806843551105	43.92824860113899	75.23815131254601
894.4865359215311	368.302315288256	44.33914050148799	79.34596029512299
915.3406945318345	364.3254168105998	46.97928984278779	83.44336885374793
938.0985997755433	373.155600058229	48.239330952390624	84.08659646167143
945.5342969292976	374.2245591650485	49.8852814203908	84.01334634497111
968.7980063715165	397.2598769905572	51.461133639897874	86.04598179789879
971.2686205861351	406.5958837284285	52.96473028969352	86.70844355925372
987.8612225333343	409.4340659924959	52.53159153969909	87.58249205999977
1056.4936524576858	395.1227548977515	50.99666537519734	83.36722706782692
1105.7071247813885	392.89757126110953	51.295998166486484	83.61647615223022
1153.2797923010557	362.27471674481535	53.178872729605644	85.801535861586
1176.8517546504606	353.96035301597504	56.02641002354202	87.21547053886559
1185.705462344485	351.4968710524992	58.50032160295259	92.14243446581722
1175.333514110774	376.6064409452314	60.38429054453226	96.1455863171496
1154.1351357550323	401.12585235437786	63.598620435654546	100.98260037685323
1172.7949025679804	421.0815680283728	67.48004998336496	107.42225259917099
1175.0854995817435	428.7744953172321	71.10791272686168	111.19086382050557
1163.2586396828362	426.89004210170094	71.93407063637554	114.95977025156782
1146.6271708515776	434.23345159204206	73.03689399193732	117.8148318019523
1133.2706707551772	443.66102644060226	75.87160223275772	116.86840106881735
1119.9568661873006	466.4590460376771	78.35472324634897	119.5613381189917
1121.1673142074344	487.37770107652557	79.03368114511012	124.22183712673127
1133.1715026663946	499.92188977959574	80.47359715001507	124.58175264341615
1134.332298073429	511.5980990934017	81.36249329583252	126.91322969489224
1137.748634339577	523.8181046019655	81.05034711883062	128.55532409894187
1159.3708870448356	543.2100238699369	80.4408276397801	129.1268571920453
1171.2809729875319	543.7565095980963	82.84415967255758	128.03388573572636
1170.0715339125888	543.1456695266407	85.26303782244352	129.25556587863744
1107.7124960564488	563.8161026073436	85.64485706536783	128.2399720856716
1065.9438472602037	587.215973684291	82.0425049770387	128.36157975991
1036.437840937383	585.1852506265233	78.4815047897718	125.83639294566575
1029.3875957555754	585.9744018522666	73.40643674966864	124.258090494179
1015.1205744958335	585.9841756496343	74.15777280128955	121.15157551412571
991.4773557042686	577.3927703608288	72.58983893316962	116.96059858181468
980.8050963387714	576.8094044081872	70.21811844344454	115.16280058450798
982.6638506331751	570.07414640082	66.50060985463716	111.24618577863687
983.9976388214951	559.0329423476808	66.60993356408055	108.3364931101635
988.7640193525691	546.6335990315749	62.54797388897175	108.51657350069951
992.6291610079808	520.4610090379648	60.15669609746912	104.80219553505074
995.7158956930822	502.8259342256492	56.557108947104254	101.46411186211377
994.8484468514118	473.215650213031	58.2920066304451	99.10284578112793
987.2143694568239	457.42831716276896	53.89823773990763	98.72688590211777
976.4149830710957	448.9508527225358	51.72216274599461	96.66193657028865
950.7356310388323	439.05579475447	52.26505241987367	95.66376480115515
943.1530187905423	438.6077613615222	48.99517179444491	94.25544344679977
926.5365550234128	439.21939612650453	46.58669734424693	93.03217391683503
909.2104963255827	450.1280088069048	48.71739453221517	88.55970600013691
901.5785014803052	458.08804334328835	46.86970339969847	85.47339754467338
894.0384007842766	463.57209480708394	47.51689949280837	84.81458411633034
889.1141229837397	469.6960341006779	47.0496403084785	84.945683271627
883.348128240603	478.20427524158623	44.181665974292756	84.38630249890608
877.3054637945557	486.4455283145536	42.2684621622853	83.9021194433737
877.136909346358	486.7509550676274	40.64586313214926	83.29126593722617
877.1823163987344	488.83778890799005	40.555049027396564	79.11759825650081
880.357213167438	494.63353055379247	39.785216061206356	76.82604925025719
888.5346429259627	487.9515133117647	37.9350681726476	77.49846105938344
888.1611879571917	487.8403772453436	38.68197811018938	75.9297738722093
890.5139183564507	485.361158152151	35.757438243427345	77.32637019508255
897.010009784722	488.0138095485619	36.76932941678228	75.52208590973504
901.6584990841038	495.4304654909881	32.69788040021465	71.1398331892747
919.9624692200297	491.44732761601495	33.05048730035098	69.46422706826758
938.4231822505317	492.1034502595486	32.670072880844174	69.74072141778697
963.1442794956168	494.7534897766772	32.39801554714356	67.61290929685022
999.2892761415046	495.9061589583716	32.975625527928614	66.85794547117565
1029.8946510138708	502.7996203997007	30.641336484041126	63.91668640183077
1074.405683810648	510.41671342225504	31.03739273546541	66.27295055573445
1107.5810803429677	520.2851415980592	30.999955713012575	64.62155494290437
1141.3978850707435	529.7911592238387	31.556598449626257	66.36307470635228
1187.8838275321107	529.5069818588978	32.669202808534735	68.4489211988411
1210.5977958978451	524.419772322098	34.260007211842456	69.21959204548567
1228.9911369857873	518.1689674393856	34.415515716772546	67.26556197928744
1228.5650262130205	509.3654575613342	35.26773726230608	67.48986147369263
1225.0723227289973	504.03235830287167	34.26206258111253	66.9685456816812
