# Supplementary material
Source: ML conference proceedings conference paper supplement (https://proceedings.neurips.cc/paper_files/paper/2022/hash/1c8c87c36dc1e49e63555f95fa56b153-Abstract.html)
Supplement: Supplementary file 1 [file 1c8c87c36dc1e49e63555f95fa56b153-Supplemental-Conference.zip › GOT-10k-Results/VLT_SCAR/GOT-10k_Test_000089/GOT-10k_Test_000089_time.txt]

0.036648
0.019345
0.019222
0.019114
0.019044
0.019219
0.019316
0.018994
0.018946
0.019016
0.019037
0.018958
0.019019
0.018843
0.019038
0.019007
0.019059
0.019513
0.019327
0.019246
0.019048
0.019069
0.019379
0.019536
0.019179
0.019080
0.019082
0.019037
0.018994
0.019712
0.019698
0.019510
0.019208
0.019285
0.019371
0.019420
0.019075
0.019059
0.019115
0.019402
0.019307
0.019258
0.019111
0.018987
0.018958
0.018992
0.019033
0.018970
0.018970
0.018952
0.019931
0.019344
0.019165
0.019231
0.019052
0.019093
0.019483
0.019229
0.019104
0.019182
0.019143
0.019077
0.019096
0.018981
0.019054
0.019149
0.019163
0.019302
0.019246
0.019174
0.019193
0.018981
0.019190
0.019247
0.019360
0.019195
0.019111
0.019126
0.019331
0.019454
0.019003
0.019109
0.019239
0.019786
0.019670
0.019212
0.019415
0.019261
0.019162
0.019327
0.019613
0.019224
0.019122
0.019367
0.019646
0.019626
0.019588
0.019419
0.019249
0.019119
0.019128
0.019185
0.019086
0.018975
0.019096
0.019019
0.019742
0.019613
0.019292
0.019190
0.019494
0.019352
0.019240
0.019307
0.019297
0.019306
0.020339
0.019444
0.019403
0.019160
0.019221
0.019232
0.019197
0.019507
0.019387
0.019337
0.019344
0.019286
0.019297
0.019164
