# Supplementary material
Source: ML conference proceedings conference paper supplement (https://proceedings.neurips.cc/paper_files/paper/2022/hash/1c8c87c36dc1e49e63555f95fa56b153-Abstract.html)
Supplement: Supplementary file 1 [file 1c8c87c36dc1e49e63555f95fa56b153-Supplemental-Conference.zip › GOT-10k-Results/VLT_SCAR/GOT-10k_Test_000090/GOT-10k_Test_000090_001.txt]

1293.5	309.5	125.0	94.0
1297.1656529353606	307.6150791147436	116.6686941292786	96.76984177051281
1298.9478234108633	307.09595015503066	109.74677028382206	101.16568258438983
1294.5668452215364	314.7417368635505	105.22565216952418	109.11948953001581
1290.6557583531167	323.74198369372607	89.42020234085007	114.7466194351781
1297.0413027577627	330.0645035535058	76.64911353155821	134.19193137018993
1300.4962058601566	333.712060715361	66.45003576681354	149.92171796617777
1301.0327648937782	349.0839459928901	58.690039058019174	162.64265858120285
1297.4561227251875	368.6358548254766	62.45524041619391	164.19583666410603
1295.9234580670563	388.2255065648217	65.52056973245655	152.84249427440466
1294.478241486694	407.8003217103687	71.78035111395519	140.6476497495017
1291.31773694121	428.0415926390421	81.40244134175703	133.17591926049099
1280.6830190292053	450.3411364737187	95.96286459983489	128.8309069867233
1269.0157618795754	467.74539142380047	112.2362058300982	129.3282624315421
1258.8867771289897	485.56093340356387	128.6923918519845	127.91322978558071
1257.6379451855864	502.71674648716123	131.19005573879116	125.92983365361471
1257.8451872437763	518.2442114314609	126.72665135193185	127.26626592885461
1259.9976096993157	533.8301635115024	122.4218064408527	128.09345140374376
1256.359973077184	547.0705082264057	121.80734089352401	129.226847744512
1267.7382521558816	555.5910560762394	110.90937057834371	120.09147727298787
1277.3328392589337	555.4384774012264	102.63146663832032	124.03372471170768
1237.9008428351776	600.6761230920064	113.75000379482566	129.82829141736846
1233.6864875443073	616.2618058436032	122.17871437656633	133.1610260919917
1226.6488495603514	640.0050633650967	128.21365367728797	133.91653105214664
1215.6310625575052	657.0352714146079	137.8658571931149	132.87843625943177
1200.2559630803016	672.0393031941741	143.03500333277864	132.71493431750042
1196.018753704214	689.6930052299871	147.16766375025605	127.79983858875913
1191.893051873332	711.3564371827429	151.09155680530185	119.0930595369925
1183.3799273814116	732.4445364180804	138.38594023169196	110.89613598911853
1173.804982435681	748.3287126581263	130.0977201312392	110.48562349978513
1172.706302935273	755.3562719626341	132.2950791320552	119.14389852095564
1172.671290527399	757.4702948564095	132.3651039478037	122.83248205860382
1172.092829672238	770.01853197859	129.50386704295116	121.84495950528877
1174.1475905184784	774.1565246950599	121.43655554236128	117.52676388045755
1173.7377682935658	790.1228937633388	114.73004808523618	111.93555741822607
1164.3013597437102	807.608568886748	112.18604953987466	101.95049209065928
1164.4273856263899	826.1641004008953	105.19146623276795	98.5520867711005
1142.3781482536942	862.6306792647953	107.58419947481255	83.3653403556271
1095.7771660275205	891.3091809262488	122.75947535617497	71.02373428521153
1086.6909786780984	895.5683185023593	128.8342806291271	62.50545913299056
1079.0179176462007	897.8500154240885	138.2451688994654	57.94206528953204
1054.9713144210764	915.3814327774365	113.7583728399548	65.21756538019554
1044.8135304049888	911.7082550893809	106.14910887775866	66.9789543574325
1059.8177905297784	905.9361655222575	95.10306140064323	67.68743476455717
1067.3380791481065	908.1570224807392	90.28058398118688	63.24572084759379
1070.9487938663979	907.8474467938355	83.05915454460391	63.8648722214012
1073.615913804681	904.5651467617583	77.72491466803805	61.19418113653745
1080.0182894016534	901.7541122251091	73.65547009791521	66.8162502098359
1081.7537097371958	896.5980828904849	72.39612692377824	72.70531388518873
1088.5904821642628	907.8004217873424	74.71800741121936	84.57654753770551
1084.8352061607889	900.2432781155749	72.19906208915523	94.67608621673459
1084.5323381422406	897.2566591101257	75.42678677418401	103.27131287556564
1084.4877304962386	892.1562329020433	78.32159161784055	121.88893394668739
1086.378010864814	896.0230121223327	77.6752344076457	136.09480019480208
1091.4063569411235	895.8132149735773	70.95342418391621	143.18415835009108
1094.7443188835564	895.5295627658451	64.2775002990504	143.75146276555546
1097.661376428562	887.2377524425838	58.44338520903857	144.25646244569657
1099.4340646004493	887.7245089561243	54.8980088652645	143.28294941861552
1096.029652235275	880.3339945321917	46.4949529378822	136.76734534565813
1092.8353308314247	871.2470629178956	50.08647785366129	135.361383330796
1075.3273882114102	857.1074231404812	62.36475097209859	121.00764015764047
1052.6426639987428	847.6242721077144	79.22822360762791	114.31856401234934
1028.1345618448054	845.246329831352	100.92554369702556	116.03901698524325
994.0465186651825	835.3889069809145	121.29594633339411	115.26571251917095
977.7065831176437	830.6190676070433	127.90027249152271	113.63015772250642
953.2893911230065	808.8585756591162	142.51693728874818	115.32948482807839
922.5908409363155	793.689427054249	155.25491819746392	117.28329568342444
905.8683488527478	790.70313810689	158.7293080059273	118.97436009833214
904.0582717653713	788.5413396184055	157.9873935251437	118.93588841976485
905.8897579361309	786.9497350772763	154.3244211836245	117.76895501965122
915.472798224711	782.4357677917725	143.70885347007925	118.24637672704381
933.7064127369734	779.9676106510146	136.0844545395228	119.06228670942107
937.1729321069089	779.6118766552531	129.15141579965183	119.7737547009443
953.4071679842458	770.9197315109047	104.52171590200422	133.23865906112795
960.5971221275438	745.2405457015008	86.40438365960529	150.96021507770936
942.6688234779324	719.1166088669693	88.93125837691366	162.47176114665507
926.5225392714468	696.0142095786113	89.8916099803634	165.59476161027914
918.2263915656703	675.6717654196813	82.60987097703423	170.4685983058154
923.6648479804911	657.1119990417606	71.73295814739248	164.41327312100512
895.7508070040975	614.9885362041647	72.86305230659687	157.49688580689238
887.0798162574644	604.5233021699256	75.94110986049502	153.46548698147635
871.4082506440085	604.4262579034895	82.35893713412162	153.6595755143484
862.2812739856009	609.0029557370391	89.590346774886	155.5287235233
847.775176890764	605.2607171287854	91.82707495140839	159.18813416650013
845.4505286502963	609.6478308895586	84.72462185493976	162.1656562223577
848.7497708053479	608.3710608449182	74.28621551859521	164.71919631163826
849.8643612301594	611.776616283841	60.96935237742164	165.29987362815987
852.9445778216611	605.8546943064537	54.808919194418095	170.20910641770377
852.342614931203	609.4745520132283	52.58773642193946	166.39449955754938
846.9533981167704	612.3341108542869	46.71579622670136	164.0054566402527
844.6580623456173	620.1122733862225	51.30646776900737	154.8238157042922
847.5093234146565	609.1422841997368	45.60394563092902	151.62662588318858
840.3033607872533	567.6866986455694	42.06567724566868	153.76192561122252
822.412729587659	562.5907351095833	54.20031740327448	152.13054156240355
801.6710650849072	558.1234600635913	70.43178797790287	148.4391624389501
784.2566751381079	556.9694002865111	84.91087290311403	150.74728199311033
768.0720468987639	527.8117799940073	87.8819916046677	157.615781468133
779.8919410486541	533.833869896232	75.72295144695553	168.53309794781978
788.7255043876622	532.1825072023829	65.6088135974166	179.3888121639954
794.6971099648496	538.7959336521819	61.17114561857231	181.17304561545836
