# Supplementary material
Source: ML conference proceedings conference paper supplement (https://proceedings.neurips.cc/paper_files/paper/2022/hash/1c8c87c36dc1e49e63555f95fa56b153-Abstract.html)
Supplement: Supplementary file 1 [file 1c8c87c36dc1e49e63555f95fa56b153-Supplemental-Conference.zip › GOT-10k-Results/VLT_SCAR/GOT-10k_Test_000091/GOT-10k_Test_000091_001.txt]

615.5	307.5	184.0	249.0
620.6777299718682	348.6961806354327	172.64454005626362	267.60258103480237
646.7986158989038	393.319540663827	168.65089268126516	274.85210993615885
645.5325966034758	424.336346234319	171.18293127212107	268.29095991724955
625.071063438248	434.1479468161442	170.8351175669498	248.66775875359923
615.0838712726254	426.6316349354548	171.07593243388135	230.81110007445503
607.5690215446226	432.6842618283034	173.48277705853667	218.7058462887578
605.0434743063032	419.18590688141285	172.3679463439292	214.87293022630774
605.8746583834209	411.9152541575111	176.79466872245766	198.96878301029193
628.1613558100967	405.7372807213423	173.625981963532	199.49481328422215
651.113687606729	406.86874316197753	174.70040988763407	191.35950196328088
693.0092691391546	427.7772869668937	177.35770316437157	189.8850273128567
718.2890917245802	441.2986560614632	173.0581285871632	191.75483324474442
730.6918769900639	412.9319056140182	165.4821564565163	196.79953893867236
735.410647300193	370.1952487436992	156.04461583625806	196.7744745830124
731.379908172155	338.41645762211107	153.01220867185316	193.76874430330327
725.9213564005051	316.4384905627336	153.02595221608226	194.11123842577643
723.4049063353589	299.02503205141556	152.60170544178533	190.73812711628662
724.7401951142506	320.35470116788076	149.93112788400188	185.86885923970607
726.6065820079872	351.67342769862444	146.19835409652873	186.59875356121785
742.3086051467401	393.0257625053543	146.18172359502512	187.59385935043076
742.9289854938761	415.1243052974598	150.18714721687826	180.12006397909633
738.9081501912343	394.57427465706473	153.03247189361403	174.4530119029556
734.0805608652561	374.88090585722307	152.3786647318949	177.75829915477416
729.9901205266478	373.2929825922178	150.16921508165422	175.7389805210562
731.5312540143923	370.55671295767706	147.08694810616544	181.21151979013763
743.1347422801555	343.87066523423283	144.53224172429933	188.1160074002903
762.2227900001002	321.87385823858756	142.947261207871	185.063902204274
782.6393476119821	304.6819018942527	138.1982633484893	183.3636975285616
801.1812248508204	284.6566159456487	136.47476182699245	183.00255176156423
811.5434549341771	272.57583581100005	130.80364806048098	192.1107656306592
827.854771947888	267.8342096530823	133.61712874838017	206.65632004868337
830.459166178819	291.4092068570758	133.73602616903247	212.78318446584063
844.9662477594744	324.746237696409	142.67154449683377	216.58710269552483
857.292897496893	363.18334292078293	146.1562469411587	201.61649646893386
857.0782415325439	364.76480594596103	152.0448570001373	187.53497415801678
876.8251983010525	355.23676722279095	155.2742029245497	174.5486070082847
887.1196645712623	339.235755422487	150.2607971668317	175.39957704348922
890.2561367388662	316.4411060674813	149.11254126968277	179.9913682490294
894.7940771235341	293.5323328879981	150.39072511878223	179.21562382503743
912.2167326522234	285.50363698197475	146.6595334635888	184.9016425030224
912.8715308125958	287.6787120626647	145.34993714284414	196.18972998429604
917.7058077878994	302.0304014925094	141.0450428070271	221.12294727251086
921.5368490657343	334.1560193290077	139.05143209375453	241.8987892354731
933.5781661169201	364.8222493838487	138.74602488435622	228.1207829117376
936.1093433643604	388.59643278335034	139.41807972140413	214.9788721043049
935.6050480095428	407.0915060465428	140.4266704310394	200.18572796575717
951.2020896413093	407.0559674507013	141.29236420291906	200.2568051574401
950.5888451914785	424.34509877395556	142.51885310258055	192.47179847412716
950.1549515154845	439.0348923377018	148.64740025142925	184.1352505340775
946.1632684371205	451.7985101864228	156.6307664081574	174.30766502219157
965.2241162711762	428.1795131740426	144.55791996215072	185.0772701360055
968.3641644762356	406.1125791961939	138.2778235520319	187.76080585665446
965.2710281205301	377.42450392773634	144.4640962634428	183.70101596189852
964.0217085242941	357.565198594963	141.80402413044527	187.30864734915752
961.595067363332	347.2962722928727	136.31635307017356	197.50554657114242
962.3151398336738	344.4845547683374	140.11112079145593	208.36389428217933
963.7652374012508	378.45522608743636	148.1337596598021	222.34380667023117
954.6902075278921	425.3951539784251	160.47886249002082	215.538304635734
911.7559225109183	452.756014077887	169.57413453418815	208.06169089205991
877.6668709732312	434.11424351937825	184.29858876346992	203.7701717954502
839.0983477572438	408.27031492820595	194.2322842986492	206.5828646892162
780.3444928826214	383.3703292891465	204.44788726219792	212.20373317322492
734.2889248695947	375.2890029998074	198.14164373333227	234.92754438889776
746.6621452792391	361.6281083926169	193.83670339611186	241.8078331212102
739.9110829855766	332.62346683004665	193.6385526784768	251.8661526789906
910.2598676291259	315.8773209993896	167.97811151042714	264.35596913236805
904.4841114852387	368.0445692174814	172.76363854144935	261.51125154746717
650.3943338386272	372.0242812663597	184.3110831941442	273.961366243157
563.348373355278	351.6819801282759	171.6636614749455	285.91683887534043
494.41185789246504	353.7388558705288	173.69401877129872	288.95270179237525
440.64741463231525	316.2469259901312	172.78745545333743	298.87529165021397
596.7529371413824	140.2460858506688	191.8263248746125	253.37707460184768
622.1087610951092	99.32295790329886	197.06912458652397	223.31443525785733
660.4649699986142	86.58035315897013	206.37754138498036	202.48073380510994
754.2199395837429	69.00585945437933	212.0267987324517	192.55924202682144
754.6370338684249	146.37545594283216	204.82302066363593	197.05978653621523
795.7284059555856	164.9303514604433	192.25452333025206	216.9071065526693
872.3935936844256	216.41447709132143	180.6165920733342	210.5473399732508
914.5258178163812	209.06486902087104	170.2187674852997	225.2465561141516
930.1550522857685	250.28869819289122	163.81113596573613	211.1387006729426
1092.523737848996	419.19146408565496	186.75784632918305	185.65954717495407
1180.3345028890171	526.1663855587092	175.35168131369818	194.57341395931616
1177.1451454318099	547.0291002347606	175.90677061730747	187.78973827204487
1167.3108306871654	413.6329746933183	178.3951808395111	173.97174132587296
1079.9952669609738	430.1115426340104	147.71419344324616	207.6023183683745
1094.5459916801915	407.25186672972274	129.7640040222666	236.5947801507665
1105.0010341917073	397.5403362594651	120.26947379293648	238.8945089007296
1107.5419856809729	387.2980631710543	120.76603821922112	225.90825064865538
1279.204960925421	508.8263471530286	155.1810955507636	187.91108693008744
1229.742378760707	505.21201452273414	167.75623353809686	162.758492312391
1042.5915837645728	422.3484022629655	182.92610270877418	161.93187529148022
981.492594747976	425.0621816936202	191.12940689779592	161.93263423227427
947.826277158868	422.21301972644267	191.79871506014683	167.63095816662934
911.6103026549013	414.98926968475166	179.3740132947205	182.07845825001135
859.2098134914667	413.60162530617777	176.02461523028094	184.85374700715903
836.141531423586	427.90621094804834	176.69959071765732	190.34076720970677
803.8587449220527	412.1669563214598	171.9151832293569	192.92345125814762
807.123456977812	412.413271681036	159.64265061480168	203.9170375450688
799.7406920558315	439.7478791224222	151.54927689337148	212.10980746712204
820.519545146353	438.77557652375646	155.6477899954865	208.34738525405885
821.6867233631767	433.4888364004689	153.31343356183893	218.92086550063397
819.8102633111579	435.36557290513446	157.06635366587676	215.16739249130285
811.4995054918594	425.3718970339344	150.31159157747538	217.6225359384543
812.0869714028623	420.7094370221122	149.13665975546942	221.17750892875299
809.6799506981074	438.5648082183709	148.14663575489917	226.09522440679734
768.4921763998042	445.2367493275907	148.46082120238262	218.61286812758095
768.0828002327185	467.0307901750998	149.2795735365541	215.3044385790932
768.604386809816	496.90884317161135	159.67219022366166	207.00938687193076
772.478735153021	531.4720335819711	163.44843521483764	207.03265611672893
780.153907197547	532.2991437396948	153.9223370767093	211.20268175220502
797.3271825145137	533.1125759115124	159.7017737085663	209.57581740856995
786.741380252251	512.720013995285	157.66489694840678	209.74609899282672
859.4269865504124	516.0270159972525	150.80845903138362	208.90354393386252
799.8059102349974	480.55604477574957	157.12549104078948	212.09041400401412
836.2102602485811	491.9231269057942	153.8963174040427	224.14601293913506
813.8640551479082	451.4130415969738	157.09503979089277	228.10647761556942
817.7558306495312	437.39310058889623	161.39217123521735	231.98499473658336
817.0182375522818	430.98087271645704	162.86735742971615	238.63952210859014
800.4865378919797	408.9316303832587	164.45710142578568	238.67488932063816
776.4752634941349	387.46608803461083	168.22858327152676	249.99806905368513
774.8069713918172	385.49622434746306	165.01046728350389	253.93779642798074
767.7516714964456	380.2101081597123	166.0003716100813	251.38933333931652
767.7107715586131	354.622808419605	166.0821714857463	250.25522481029031
786.667057068742	339.16299724121563	167.3070545242494	248.56030211810167
816.5375198325148	320.3739873327564	166.22602644892538	247.0317236335389
865.4162991108376	326.28273698568944	165.6207469184577	241.69104292941807
916.3244063821569	334.0000304036116	165.98582950557932	232.6427871641837
950.9676688649105	355.5720380873364	165.5113050769281	220.77695385894134
991.2583713009134	356.2967870552606	157.74224260858253	213.25976072278795
1032.836509241619	356.00119482854967	156.15240870771802	208.02477074902788
1056.4885437939956	362.4002420906761	160.3329368881215	206.66769784369865
1083.5644021645555	358.6894356972756	158.09331505960714	219.8573211763447
1116.0660151701939	353.7427491503835	158.3429297473903	229.75069427012903
1142.2431475907438	343.83674710202615	160.76079251254833	237.3911144543419
1162.640694566859	340.552156367989	163.65275771803783	243.96029592241612
1172.527614252289	335.78283743419786	163.04256249039565	253.4989337899985
1178.6131387033083	340.2624718690194	163.91336467213011	257.58151600412884
1177.7678777514718	348.93641360688173	165.60388657580307	253.4268556328899
1161.6754883580184	346.64812274527225	164.9757848290908	251.44086124938508
1153.3846117144712	346.9231160268887	168.51292846588657	250.89087468615213
1132.2617515116096	346.51503389053903	171.32151331932334	251.70703895885146
1105.5112244203383	352.15996788042094	178.40046054394725	253.68063010992165
1101.5962702512068	352.91358375725537	186.23036888221043	258.9519572400736
1066.847236509415	357.30024910334714	199.82986176492557	257.1659483729985
1035.9031101360424	357.0699102550416	211.43984520152415	257.62662606960964
976.4374196896003	339.89903199163103	219.70248943691547	269.8346352649321
916.066365826829	338.28101216671735	224.95759715810485	273.0706749147595
911.9120131044408	341.1503465720438	225.43249276781478	282.999625774239
847.1172375980185	335.3688138069416	235.11258444789087	278.57476339340764
882.7443869951978	365.53144689136184	212.35222121859675	315.2373683546959
848.2457536100749	349.25511159156747	223.4671330357595	322.9833154029634
872.8538085478144	348.01652870380605	225.66963644570677	334.0302500593906
874.8125770685281	311.43077541377136	230.5248761218096	337.0195428992182
885.7869443608032	277.75704965390605	235.27099432927716	333.18072030690166
919.4548394466104	277.28453802389066	230.36636362139484	334.12574356693244
953.565589032363	279.9650345763705	232.96099651224347	328.76475046197277
956.2102099040521	313.8700858391994	227.6717547688655	322.65160879486666
956.9429350216196	321.6033538485335	226.20630453373036	315.819253449813
976.0101660881419	330.4202935664057	230.60494653528616	306.6919948409888
1008.6980236635798	334.1205654385204	224.31015798774885	299.2914510967594
1051.544069944496	363.5906432449227	212.63884061622878	297.92300952086424
1111.944032598567	368.3269844841859	204.01044333622366	296.46257904434765
1137.0765498933874	372.4357361584135	208.67982354521826	296.0928492385548
1131.3126084353107	385.82768871598745	212.2883849608596	293.06690862494304
1130.1941098673437	401.96969041928713	206.59248914579652	308.3802629243254
1124.3804456653215	394.0214592423897	202.0796064395863	316.20661972299285
1125.7979849267851	390.1364148086624	199.24452791665914	323.9767085904475
1101.8872371285192	384.4611903275453	197.9802566391337	327.14619640700556
1088.0399686053936	361.1347046979648	201.0540093620198	316.3506709116484
1062.2958113885613	350.09343113515126	195.86072084852538	314.1411024884932
1041.818045882081	318.00932748792206	196.92953944684632	306.5132274365999
1012.0422178324358	292.0498722028529	193.43209081393874	303.26417136606483
988.3837708931983	277.9838101151391	194.10478656841667	292.5261304381619
967.2844717042274	268.52085477608705	190.55822252922314	288.5794599076983
945.5494441552985	238.1045593210883	188.9928953700514	289.36487447498973
938.2476620074233	239.9621982937393	181.1215981470155	285.6495965296877
936.522801479153	259.4978135514901	177.26681547581893	290.4053883806081
933.4293116237337	287.5431057980694	176.1429556994909	300.11235927195
931.7640285951974	341.21453866017214	172.0372315525025	319.1864270167805
928.8170845088188	410.69843762768124	154.98549123876188	310.24385717191774
900.6397973439946	454.7395076778869	160.77394622591976	287.1752990832799
874.5748110183843	471.63313431970346	164.01764116310972	260.37179975879394
852.4234540490875	474.9998604812399	161.83969142547286	253.63834743572107
847.2542435798401	478.18477794544896	159.17228794765919	247.26851250730292
825.9188556533423	481.1365913835456	157.30246192251317	241.36488563110967
824.5337528692512	466.4739096625166	153.82943133447026	239.47406829204107
822.3275298669016	472.6951575878794	152.08494295616623	245.50237559032468
844.4880846626371	472.03216320948593	151.28885298352358	240.6105044015647
873.6274348914991	465.4984956396908	148.19308824982994	241.41496493581474
910.3135959709317	462.53415232765343	147.91868939552384	241.25215795117614
936.2463354490936	463.69400891701343	150.8132833620935	238.9324447724561
963.197696369765	455.93266401822996	145.69762531136382	242.2583686223697
971.5123021941325	461.80111215527245	141.1925104148751	242.64556910053102
981.0493051995072	468.3716911229941	140.09353144206398	235.49608684440045
1005.619750092241	454.4760859469974	137.88784595165177	233.9527945119841
1019.2293991636548	461.58350502453374	133.8953380571824	237.15804904318006
1017.4139081442853	463.91811577077056	137.52632009592145	238.27534136570927
997.2711892129403	466.4997185166486	136.75867387045773	227.24740957564546
979.0870155186054	476.5180933195237	133.31153940530186	218.58651192813107
959.0622963170076	476.5142260479014	129.35399452483816	213.09337356091834
941.1552008365913	478.4852983778636	122.34889615707047	209.15122890099389
923.46007986598	482.833986424474	111.15928691891051	205.6293918277044
911.7704265199127	482.6181453185625	95.07435762036947	206.0610740395275
794.5410843834738	419.67454406385593	110.46263752393217	192.11610354725036
795.2829632734364	405.36183463552186	123.14321336397393	182.96996608400678
813.5827788776339	399.3917511353307	120.12683794543858	185.31491714442907
820.3476344927008	397.94096301131276	120.94504965493016	183.4338524125898
823.4888501377415	397.21058695530894	124.19871415155856	180.12655663124264
828.5515786678868	400.2595528687842	128.39000209161145	178.80087313773979
826.0321029050555	403.4438706740484	133.42895361727412	172.43223752721138
814.3276407312474	506.60347918501077	118.38259005243697	201.65165896906296
811.3733055564422	501.25252066872673	109.30002461506432	207.35649740597012
803.37069713147	486.8202804864093	110.52549564362688	196.80832224691994
799.9594915919507	485.36601935266435	112.55592553975274	194.92486333149697
797.3351225938385	502.05533415683306	108.20749348134004	195.13632891438948
798.9898913197562	525.5953546157701	104.89795602950454	200.06182621169305
797.9114985335775	540.7444291865415	107.0547416018619	188.7384726509323
922.0793132391635	450.2196628764793	121.69108991501668	185.24626651714343
953.3762682229407	451.87965380866876	131.212441111721	181.9262846527645
828.0614870253469	549.3135799292091	126.25555218353142	183.66339496812788
848.8229666886914	550.1706519315492	118.75003994299857	186.8088862614703
859.3418695998921	538.1776030912248	116.84030486892719	191.66691319378884
857.8043380430547	523.0171067637084	119.91536798260188	193.0527668544222
863.2253178280852	519.443082765206	123.75802391214975	195.30594301822399
879.4538692915185	516.7857307186651	121.25860042531838	195.62770053796658
896.4916296173188	467.0766988861077	121.87409380699128	205.84029954609235
896.7465890596054	448.2257470036955	131.60083839843938	202.59554940683157
911.4479276113177	423.0343623716008	138.83029982324766	216.34618014278809
929.2530719199898	410.68975684528107	142.13951013394416	229.91553435884452
924.1261884850408	408.2774675999361	152.39327700384231	234.7401128495345
940.1369212784866	397.1558806725318	156.743874897198	244.8592655442605
940.830066199351	390.3640619058819	155.35758505546926	252.1566170910022
951.3411223362691	383.6921492673002	147.07971988130885	259.1283188183278
952.9809912138713	355.0682629310942	143.7999821261044	265.68934533706175
933.4450138769757	327.46076206408344	150.98778690127781	257.13604727384745
930.2860134265428	314.9809682222502	157.30578780214367	243.8602212683387
932.0452270251117	310.2451672607847	153.78736060500603	240.7704110521525
918.5706274046045	313.9590270283247	149.85833603272582	239.51833627973127
895.9729072737259	315.1788033755608	146.32465971990766	249.26106272890297
866.2021958987812	322.5081553936667	150.27538377672604	246.9558472911514
820.0291683893104	339.32020551512943	149.48468419057934	238.16821494291608
800.4866136293587	370.3611739636436	140.05218393088444	236.73329027038588
754.2904171477755	397.3412184254724	144.1756887326979	235.73453424354
725.0625292872392	421.540974659918	137.29979461554416	240.78820618774307
696.9772398429823	428.00663905588846	128.59107935867178	245.5512303445438
653.4117387545285	421.40736562892323	134.24787922375518	229.6518478013943
631.4849424654983	423.6804590189133	132.65143594160259	225.10566102141414
597.1405311225925	432.11806000263675	139.88612765491388	213.8171982332854
595.4302086976147	421.47484115251314	137.76714434249635	218.48475144641264
580.7572148891768	424.97655943671907	139.24238832062443	217.0554636057504
573.7003859056001	431.28471787194064	153.35604628777793	204.43914673530736
567.100171672333	436.1852032611853	166.5564747543122	194.63817595681806
568.3136468329367	439.8853758632304	164.1295244331047	192.92163610698086
567.2019736608894	446.25853184818743	166.35287077719934	185.7936048140496
575.0962975870962	444.37879756384893	167.19472497730254	184.0095726985544
598.2346717302642	419.7054390182532	165.15150755871167	183.59356756353242
620.4741605353178	394.0836776605544	164.5935565959069	185.4259353007149
644.5003932910246	407.179386123012	155.10882798822462	197.80225527953104
667.6266201438507	390.6262107452761	158.7836810806746	197.62373483626794
692.5386873705081	389.1258920839308	159.39893979739588	200.62437215895858
717.2465354873705	387.1216548264343	166.58682608992285	198.9724884213265
721.5463866411267	388.1192994365674	157.9871237824105	208.47957712986312
730.5333914194534	379.54243871097435	151.52795040921342	208.36104430586443
755.4156392462787	381.561483535309	152.6120894125099	204.32295465719517
633.0476251470316	460.3811718646913	178.70406804456286	175.627504665819
766.6174517643325	372.72934537969945	168.24313519548778	183.53199216698084
775.0053657261458	371.34551168438156	157.00576486212387	180.76120196735388
784.8892528200912	369.7075796205516	142.55386563048245	189.35294105126306
806.8824681997085	372.98902952103225	135.06454655465524	193.21778744556093
810.0537218986203	367.1096441527983	133.8715212271406	189.52811197110117
816.4686147664091	370.4566439713854	136.26378777454622	182.834112333927
819.9628426398594	372.2195387737248	134.28709872824916	179.3083227292482
862.7471638429588	445.6918959065628	127.53078913424365	189.98827408795808
872.4532293869391	444.9367306140547	128.0228861672369	191.49860467297435
873.2560896944692	443.73793056599413	126.41716555217687	193.89620476909548
860.8414996590843	448.7942239288747	126.16512718606344	203.84859279284083
838.3512450344601	373.11705037812465	129.8580818458565	195.21366586020162
801.5802386450993	430.87119118011697	137.18707957136098	186.66487011141436
770.5260089196763	494.0547111233239	153.5293809254815	167.08553245069277
