# Supplementary material
Source: ML conference proceedings conference paper supplement (https://proceedings.neurips.cc/paper_files/paper/2022/hash/1c8c87c36dc1e49e63555f95fa56b153-Abstract.html)
Supplement: Supplementary file 1 [file 1c8c87c36dc1e49e63555f95fa56b153-Supplemental-Conference.zip › GOT-10k-Results/VLT_SCAR/GOT-10k_Test_000091/GOT-10k_Test_000091_time.txt]

0.036346
0.019966
0.019703
0.019491
0.019426
0.019491
0.019453
0.019532
0.019645
0.019450
0.019516
0.019477
0.019432
0.019445
0.019817
0.019473
0.019529
0.019368
0.020187
0.019843
0.019290
0.019501
0.019492
0.019345
0.019736
0.019418
0.019421
0.019374
0.019333
0.019281
0.019308
0.019187
0.019903
0.019981
0.019331
0.019324
0.019345
0.019351
0.019248
0.019117
0.019185
0.020152
0.019569
0.019074
0.019352
0.019186
0.019202
0.020259
0.019349
0.019333
0.019246
0.019258
0.019476
0.019442
0.019241
0.019831
0.019801
0.019680
0.019414
0.019386
0.019274
0.019218
0.019262
0.019231
0.020070
0.020819
0.022193
0.022697
0.023619
0.025220
0.027738
0.029748
0.031678
0.031463
0.031300
0.031554
0.036333
0.032443
0.031279
0.031148
0.030354
0.026730
0.026896
0.025946
0.024749
0.023235
0.021469
0.021061
0.022267
0.020880
0.021426
0.021446
0.020724
0.019956
0.019360
0.019186
0.019129
0.019658
0.019386
0.019226
0.019205
0.019197
0.019436
0.019330
0.019314
0.019233
0.019037
0.019890
0.019255
0.019262
0.019260
0.019163
0.019267
0.019119
0.020479
0.019960
0.019777
0.019298
0.019240
0.019199
0.019598
0.019350
0.019302
0.019246
0.019472
0.019250
0.019287
0.019255
0.019289
0.019210
0.019096
0.019271
0.019368
0.019182
0.019038
0.019175
0.019313
0.019368
0.019257
0.019243
0.019905
0.019357
0.019389
0.019316
0.020045
0.020321
0.020418
0.021134
0.021559
0.022112
0.021681
0.021961
0.021638
0.021178
0.020679
0.020783
0.020567
0.020650
0.019263
0.020200
0.020003
0.019958
0.019811
0.020103
0.020364
0.020771
0.020539
0.020116
0.019753
0.020028
0.020106
0.019781
0.020587
0.019490
0.019349
0.020415
0.021054
0.020470
0.020908
0.020874
0.020701
0.020157
0.020105
0.019372
0.019284
0.019242
0.019690
0.019853
0.019407
0.019291
0.019424
0.020098
0.020081
0.019728
0.019412
0.019343
0.019199
0.019566
0.019435
0.019499
0.019277
0.019382
0.020709
0.021174
0.022039
0.021166
0.020956
0.020821
0.020661
0.020739
0.020204
0.020893
0.020909
0.020357
0.019466
0.019554
0.019376
0.019281
0.019425
0.019607
0.019584
0.019351
0.019360
0.019333
0.019259
0.019251
0.019408
0.019395
0.019323
0.019412
0.019730
0.020140
0.019964
0.020229
0.019358
0.019767
0.020584
0.019471
0.019578
0.019463
0.019454
0.019476
0.020108
0.019964
0.019580
0.019416
0.019553
0.021530
0.021396
0.021805
0.021699
0.022179
0.021947
0.021664
0.021778
0.021886
0.021830
0.022056
0.021775
0.022120
0.022053
0.022062
0.022323
0.021975
0.021716
0.021713
0.021559
0.022106
0.021088
0.021198
0.021166
0.021150
0.021009
0.021211
0.021006
0.020917
0.020994
0.021295
0.021230
0.021091
