# Supplementary material
Source: ML conference proceedings conference paper supplement (https://proceedings.neurips.cc/paper_files/paper/2022/hash/1c8c87c36dc1e49e63555f95fa56b153-Abstract.html)
Supplement: Supplementary file 1 [file 1c8c87c36dc1e49e63555f95fa56b153-Supplemental-Conference.zip › GOT-10k-Results/VLT_SCAR/GOT-10k_Test_000092/GOT-10k_Test_000092_001.txt]

540.5	338.5	269.0	310.0
530.2369236987078	346.90996948645306	279.4137592796739	292.1800610270939
515.3553678947378	352.6246531941368	291.1750385107872	280.75069361172643
502.6630833152998	357.1345493501141	298.5469468383603	271.73090129977174
479.0239128071139	357.358185354163	300.9339330714019	271.28362929167395
480.66529647859943	353.40935762025003	288.64289040082264	279.1812847594999
481.1711032947319	354.3986873869496	278.68947412953906	286.1444278651194
478.3244809210296	362.1139412854576	275.48789048961066	288.50357684276923
482.0100716600013	369.12371434582485	268.11670901166724	283.3651948069945
489.0523513356643	374.0726491194068	262.71607404904313	273.46732525983066
500.67861215534504	294.71317701210774	256.3503697756101	313.9785479129299
531.0988852978298	270.3913073851885	249.33035089121347	353.65219926667294
547.9376922532358	253.8618612456545	244.03331462493793	377.2508989975621
555.3191105549402	248.76343666384838	238.9980887400984	387.44774816117433
568.8642427798045	244.39059692829377	231.4994150475398	396.19342763228354
575.493301660661	246.36158051825782	228.04079096336335	402.05095412989215
576.8571541908107	254.31453295477053	225.31308590306415	405.80035210091125
576.4609791939257	257.95343736241415	226.1054358968341	408.35920621477953
576.7743001078554	263.90112886043624	225.47879406897448	406.35179728934463
575.9043334501697	268.55800369662705	227.21872738434598	406.88568263859656
577.7531822220374	282.2650800538841	223.52102984061077	409.12706421551616
583.0311698819174	281.482981945189	222.82024272585622	410.69126043290635
581.3355977147428	287.9739258416468	226.21138706020542	407.5756487865374
581.2811940006791	289.0154786747515	226.3201944883329	395.6143368494812
588.4025857112496	291.5208327022151	241.18673000042185	380.90052248347723
618.4876382806463	292.41752789941773	249.15942463958015	369.3724464065075
611.5949304096072	296.0115307803794	262.94484038165825	362.18444064458413
613.4141831138622	297.8009392788886	259.30633497314795	358.6056236475657
613.5677908373568	300.3742980413493	258.99911952615895	353.4589061226444
611.8299333033551	296.5468257395046	262.4748345941624	351.49756354284125
621.5482448139277	299.4821068847073	252.68162566395713	345.6270012524358
623.9880592929812	300.4755991686598	257.19571402446934	343.6400166845308
621.1146399402644	300.6163500149721	262.94255272990284	343.3585149919062
623.8383007412722	298.0610985179968	257.4952311278872	338.94198861327055
623.5034231556135	295.2900500521433	258.16498629920454	335.113292698288
623.881082753406	294.93112535834484	257.40966710361965	335.8311420858848
624.9053470077484	296.77690418773057	255.36113859493486	332.1395844271134
622.4078132486843	297.5176232807819	260.3562061130631	330.65814624101074
622.7574601671288	296.86137121855563	259.65691227617407	331.97065036546326
623.2901455732164	296.3383038871164	258.5915414639989	333.0167850283417
623.7703821966409	292.46402514382316	257.6310682171499	331.46712495256816
625.735925626142	285.2464911183527	253.69998135814757	336.6432913911103
632.1663615162263	265.8688531466955	250.11288560613764	347.5772392499491
634.8576957573875	252.208718785223	244.73021712381507	356.13529874659747
639.355700603651	227.73756224673724	235.73420743128796	376.8125082837573
648.1875102324507	217.04406403131813	227.65281834320035	388.61727454508394
653.3099220955296	195.4412924433114	227.02991863842493	412.57896967833244
656.1412078981346	194.36705245647076	221.36734703321505	414.7274496520137
658.2511195636093	246.7020388947825	227.04838459666274	379.36350303617064
655.1309583919231	268.1650558135118	233.28870694003547	355.3858368985508
658.2287029241435	237.65338447179187	236.31369759583282	361.08630126056187
647.5456779996995	264.92167821888654	238.96687886033786	362.6883195195212
616.190162812063	267.72220669107594	235.70521706819454	357.0872625751424
631.1393660269615	240.5074099058097	205.80681063839762	374.37181839545485
637.4198080678258	257.7142099290656	193.24592655666896	367.0774685565759
633.1893161431642	250.525586759597	192.98972479178138	355.3031580528807
644.9835141258187	259.5963724319599	177.94075132913557	362.7798542161445
643.0902808365257	276.3385921687885	181.72721790772158	371.24533009614026
655.2183605828283	230.4323239328448	174.6298915369827	385.84311751962963
656.2050838880884	217.4617292431975	172.65644492646248	368.44307217492496
665.3472730555881	213.40520673322297	179.51398643508455	368.1754772470003
654.1032720687551	222.1165302270797	193.505849390029	342.2566912405655
635.5073490268205	262.89566954073746	213.98667285862876	294.1204578437891
628.2766800359734	295.278559120546	228.44801084032304	269.2385311047005
624.1451321559881	301.8701744729892	236.71110660029353	263.88629986627063
619.8688627995415	300.7922784741084	253.14416452632918	266.0420918640323
620.1971522139904	297.3354461827393	260.6631164473143	272.95575644677047
620.8671729088652	278.1418507015967	259.32307505756467	294.5371686846545
630.1464956562379	226.6998687191177	240.76442956281926	336.39653135996554
637.795918972258	201.54603668676702	225.46558293077885	377.6462923939715
641.7684845777153	186.6759572929514	217.52045171986452	407.38645118160275
645.2170348434028	178.75048927432096	210.6233511884896	423.23738721886366
653.1636212536405	176.58106978374371	204.57084910603447	437.41689693803846
661.0764268155713	179.84069345057918	198.68764695611372	440.84005857830823
660.863133833152	188.01781813711733	199.11423292095225	444.26413903838295
673.6912699415417	207.10924146704377	203.29705216366773	435.9203838380249
674.0656001191064	213.8646575519149	202.54839180853824	432.30791954492304
676.212685630946	215.20810135029316	198.25422078485923	429.6210319481665
686.3984828776961	226.91808318032884	187.60114830866712	415.9195903054033
686.5130539346723	229.29438653930512	187.3720061947147	411.1669835874507
681.2930211874086	238.56145579448446	197.81207168924192	401.8924716522282
674.2997074545729	242.7188904439995	211.79869915491344	393.57760235319813
666.4429533385351	256.07262760478744	218.08678262026666	395.14640233178955
664.6761932038354	264.2325559344433	221.62030288966588	388.38259615297187
664.125806064988	268.58159904273384	222.7210771673607	379.6845099363908
665.0730967018626	266.68557769949945	220.82649589361154	383.4765526228596
664.7632778701028	266.89817937916655	221.44613355713122	383.0513492635253
665.7005077189677	266.8896600815902	219.57167385940124	383.0683878586781
663.8140174923208	265.04996915007615	223.34465431269516	386.74776972170616
663.7173776775737	261.94331364386505	223.5379339421894	392.96108073412836
661.7122143438655	261.3150151906948	227.5482606096056	394.2176776404689
658.4907184608657	254.6785996835079	233.99125237560537	388.0840206706247
656.0465771037892	252.5330969094644	238.8795350897583	372.93296038164124
655.0420124712919	260.41828154358825	240.8886643547529	357.1625911133935
652.4687994965601	261.9208550083428	246.03509030421654	344.7839200683444
651.1823455958893	267.935635903616	248.60799810555812	332.754358277798
648.2788957638085	271.88577756208633	245.283591624272	324.8540749608574
647.8631213801948	275.9290126194629	246.1151403914995	316.76760484610423
645.7460889577524	248.06736424286686	250.34920523638425	319.409976551251
645.7343507694474	249.90760692017722	250.3726816129942	315.7294911966303
646.1637469128643	245.7131809414098	249.51388932616032	315.218214007868
648.3184251341112	231.47833823362896	245.20453288366656	317.05282513658767
650.0714965724032	182.20049771757087	241.69839000708242	344.91766662825233
653.4876166012306	152.57378027340866	234.86614994942786	376.5644223585059
662.42112927147	139.39783642909987	236.12705848719023	402.9163100471235
662.6754967001561	141.95649094901688	235.618323629818	417.7542305367888
671.3904683655919	148.09069405284254	238.56617052069333	436.05250966175777
675.7318088140701	150.88329042494448	240.39298714395238	440.9768144377694
682.0637872026163	167.39972171898881	248.9557491194892	418.55731122599525
685.8159450880427	177.19021404576566	251.87827758492222	409.40317080872757
686.2560337796405	185.28220104478862	250.9981002017266	413.89869799491964
687.1149429263007	215.0164378940099	249.28028190840615	406.38999456366224
686.4188815959146	221.92854547160042	250.6724045691783	402.8169211194759
691.4880784321978	240.5250489078733	250.7552150283613	406.50873077392765
693.1072549835138	244.50297934975583	257.7945623159373	398.5528698901626
691.2811095171833	257.781878945419	261.44685324859836	392.5482422674693
688.5230098780212	277.6695126335307	266.9630525269226	393.76205782461216
686.4389126412552	288.7926520391716	271.13124700045444	381.8728868054975
697.1281064661731	255.56215678471997	270.24584652251406	386.8549157987151
705.6664090570875	223.89027984390037	284.09092500868803	388.35530234434884
715.5984467160442	225.21450735369845	295.90034781688934	396.26468003345764
713.4889262998346	232.361829557203	300.1193886493086	414.5846901275637
711.6772375906842	239.52513063680306	303.7427660676093	433.91519814152787
709.3171054645009	239.83247217841955	308.46303031997616	444.87186873191297
709.8324200602425	244.73340675008626	307.43240112849276	446.8848192130105
709.3358099624356	250.04475380980432	308.4256213241065	448.09027776126175
708.4125384444748	256.4332800977203	310.2721643600283	435.3132251854298
705.6323518016586	264.73555615710234	315.8325376456604	442.1089709595859
713.6396637643053	270.7599707763453	311.7125145622187	441.9547425629514
719.5187944838111	273.49550690283536	311.77864005132255	436.48367030997133
727.1657220774799	273.29772213307143	308.2274600585043	425.1365646549798
726.6776904483854	279.42038993117217	309.20352331669335	412.8912290587783
724.9509750145218	264.0479266214521	312.65695418442056	398.2672583530473
725.1015416723976	272.86333391260575	312.35582086866884	380.63644377073996
725.6398466244068	278.9080661395252	311.2792109646505	368.54697931690106
726.476071726117	278.41416037630495	309.60676076123025	380.23121448608543
726.9486031634018	279.9297423973504	308.6616978866604	388.04939817282457
726.8843801287207	281.8460643962567	308.7901439560226	384.21675417501206
728.0420470891261	285.49494344234176	306.4748100352118	376.91899608284183
728.0508601850881	267.9044636210582	306.4571838432878	358.3609376299312
728.0463525388893	273.0401293117513	306.4661991356853	337.6280094152795
744.7793610105763	280.76481101184186	323.70142051556576	342.4591413444001
762.6108723971984	263.87860129159486	340.48678641945264	323.7831721077631
759.7231841684891	273.4311721435077	356.72228024990386	315.1381477769701
765.9237287301921	273.58511495092637	354.89660254221656	335.98108499356994
769.6690042125688	271.20858637890024	347.406051577463	340.7341421376222
772.8794760020546	262.7837778577758	340.98510799849146	346.74703307476307
773.9630607324473	262.8607191750953	338.81793853770625	346.5931504401241
760.8404205089204	272.1841214920457	354.26951719313143	338.7400475978519
759.290943329949	270.39957063659926	357.3684715510742	342.30914930874474
758.0873621609396	256.75327729691594	359.7756338890929	358.583828838033
763.2936707084214	202.47948952168343	349.36301679412946	387.9421995228637
766.939762720134	193.21837981654124	342.0708327707042	406.46441893314807
766.7021054747463	185.27577540725957	342.54614726147963	422.3496277517114
769.3847788834279	178.3302056594796	337.18080044411636	436.2407672472714
776.3968577413788	176.59754185604342	335.3115086512067	427.5512289311517
777.357430667393	175.48035766358993	333.3903627991781	429.78559731605867
779.2302188692881	176.93934713264593	329.6447863953879	414.8730907668686
780.1097260497776	161.52933671634156	327.88577203440906	387.16576369888867
779.5997037612294	166.5203297707746	328.90581661150543	365.93280184653656
778.3743226377126	171.01581408727472	331.356578858539	356.9418332135363
778.1740203897815	173.29454962507123	331.7571833544012	352.3843621379433
787.4510662893206	177.63730098075322	323.9757498422862	354.4715177135425
787.5348709938543	183.89949203612542	323.8081404332188	352.62864584329816
789.0432182915507	188.28294235452003	320.7914458378259	354.5118755494171
789.8503483158058	189.4089267413475	319.17718578931556	352.25990677576215
790.288421300753	198.26063371122612	318.3010398194213	345.12709609865243
790.8885308871423	197.76224795997297	317.10082064664266	346.12386760115874
792.1292367870242	185.89792270647922	314.61940884687886	359.4105352523196
795.0218951599921	109.31366934629804	308.834092100943	406.4912026333821
793.7561560486081	92.71366333263006	311.3655703237111	439.69121466071806
792.1544847452535	82.77694962108052	314.5689129304204	459.56464208381715
791.7635601419071	73.0269877501566	315.3507621371131	466.92706418182036
790.9045121371976	72.90219586144806	317.0688581465321	467.1766479592374
792.9443202248243	73.52147418285654	312.98924197127866	465.93809131642047
796.5509117326704	80.975013902466	305.77605895558645	463.23832125967397
821.6959370461946	78.24433561369364	291.6264908131935	468.6996778372187
818.337720310057	78.47616264113827	298.34292428546894	456.34383907448864
813.0447402159101	79.61023357303026	308.92888447376254	442.2561618155913
762.6638298477096	91.7660371178988	338.9926410309786	429.72756542238506
750.6366862261173	97.3620351377565	363.0469282741632	418.5355693826697
730.5654075821237	113.77105515366506	378.58822843700295	410.31878647599996
726.8481348615483	109.34766488088354	386.022773878154	406.74434702486553
724.3353465779477	108.6276077653581	391.04835044535497	408.1844612559164
728.527114535922	118.09982864365321	395.2504347515427	401.8256397214624
726.1583521442594	119.07354527787768	399.9879595348676	399.87820645301343
723.0735325184233	121.12149682617087	406.1575987865399	395.78230335642706
722.711044907488	123.84836688371541	406.8825740084104	390.328563241338
723.8584722237508	132.3288451992369	404.58771937588494	385.92143603220535
722.7320667781028	140.68743079839655	406.84053026718107	381.65236022990115
722.9324350683398	148.08543217492468	406.43979368670693	366.8563574768449
731.2409798516796	147.7069192401649	414.1705099580842	355.439480427336
715.1588617599288	151.78120407418086	446.33474614158604	347.29091075930404
790.957571765699	146.93438433682869	469.3689334820224	344.5108639945815
773.1076093909901	146.6301933165967	479.5103719047602	345.1192460350455
727.3126387351106	144.489496905625	493.4416690181094	349.40063885698885
741.9369295473932	143.36840624856737	503.86676972099224	351.6428201711041
733.6288984115774	140.41219100825674	507.06366438356406	357.5552506517254
716.3526655846961	136.31881355690598	514.486011580804	365.7420055544269
672.1739263475722	134.24238019217546	519.9697439714615	369.89487228388793
679.6767675838307	142.09360511093183	518.927765798106	368.15612674553677
668.8607793247315	144.8977920438395	512.7211632916363	376.46704239205553
661.9296925526916	145.42409135255014	512.6215334666399	375.41444377463426
654.2559147029901	151.50822997441563	514.0260640802791	377.18919161666696
655.8466181966389	151.60249892530254	510.8446570929815	377.00065371489313
650.5075810876899	158.5985480404389	507.5806908332047	376.9505959622952
636.5207129528246	164.55117969418436	507.77122985395897	378.9369312792924
629.6654051363739	170.42936981673046	507.5548345796352	381.1075619414255
622.5573758226146	171.22286957767997	507.81167227021103	379.52056241952647
607.8877354855665	178.28627156240583	509.2766019075267	379.33093396846505
601.3645182907726	180.36739907617374	508.36667370838177	375.1686789409292
581.6511774890994	187.20937750405966	506.1702813409455	375.3590800754183
575.0011379976995	187.9661766986889	505.6262719939226	373.8454816861598
568.2100032772989	185.261000407896	505.39751762101054	379.2558342677456
510.05651712163865	132.75758545121687	496.6396128487079	414.78217691242435
511.02984403218863	117.98922652840417	494.6929590276079	444.31889475804974
517.2302628795899	110.29089392690554	497.0743890215433	459.715559961047
508.1652684365872	104.60363912578521	500.13969141215836	471.09006956328767
508.2554113878666	109.80231218096273	499.9594055095995	475.985969832555
518.3461824731016	115.24811303193363	464.40980410812074	480.462427361622
532.0534473864074	114.47808649753699	436.99527428150924	496.88182122886417
547.8834176277907	157.11080756979135	420.0344980588022	514.5105289047737
557.6452789308248	153.79552061806044	415.20920701747735	521.1411028082355
565.9811419548789	144.0399656186325	413.25954496273465	511.2080848203602
576.7270040326758	144.79026824822182	406.30592311536753	495.169377252955
586.0752457957952	151.2789071170247	401.78864689148486	482.19209951534924
587.0547530415386	156.7234016493241	399.8296323999982	471.3031104507504
588.6418150208156	167.96611457536872	396.6555084414441	462.524761995877
590.2419071798523	170.86000104279844	393.4553241233707	456.73698906101754
609.2095918735687	171.07783976589855	382.2791148985228	442.92173153352496
619.4112685292334	177.57095475167534	374.86227486028326	416.9489882888812
651.2042478094106	177.9132672891838	361.1365737634442	391.3342344821067
652.4499601235415	180.05748213519996	358.6451491351825	375.1982566180051
657.6608045396747	182.59408717388823	359.77931433869674	358.5691925048476
663.6292930268107	186.9523845462047	359.1549082624373	349.8525977602146
669.2131150538968	188.16126036141532	359.1524964894111	347.4348461297934
673.7956658719515	188.20393803801522	361.11437205534094	347.3494907765936
679.0574761158722	205.23348714328097	361.7471363230259	357.9159315881675
685.5046927797985	225.0658016763976	360.18593950583806	386.25072158592263
683.9070450195854	196.56017426268704	363.3812350262641	408.0026276065174
694.2153210454164	208.87448793175838	354.9073782432687	431.9447813430421
695.0931941355846	213.17355664148167	353.15163206293255	435.72316034640625
694.0286447468075	210.509099840845	355.2807308404866	441.05207394767956
693.6797089598872	210.11787390071635	355.97860241432727	441.8345258279369
696.2618166900577	130.20348517825713	350.8143869539863	438.5680920573406
717.4630453929572	86.07904356671892	358.0599368106223	439.932962571156
759.3463982699411	84.83141078380862	349.59485620821937	442.4282281369766
774.0686521519831	114.74653033870925	320.15034844413555	482.2089225019961
673.9001587969306	129.30316277058017	331.92262789390895	490.8085990903206
770.6970579733975	126.77636384249939	318.8707867474006	508.75805103265543
747.6626642124037	116.39604657094753	339.0446153132555	490.6762471415599
739.8893075240529	151.78361352156742	328.5677140921755	510.98376433255544
753.7480029464919	152.57723566797853	327.13638306508096	522.5395499486249
742.9478733154044	162.08794002773243	335.4446731690258	516.8101103873471
739.9265360553187	181.28774146000484	341.4873476891973	505.1007935178601
744.8167023452149	190.27062476603382	344.9767211769097	473.86532083829746
740.8042688001781	201.5003402426123	353.0015882669835	451.4058898851405
773.5345830467264	208.6428349533065	338.1174212530352	437.1209004637521
730.2079776388659	225.65270036268765	339.4856882691233	427.4682964448849
744.792877378931	233.59895441509082	334.43215047240574	423.6339191817849
729.3409472326338	235.06445196558974	329.5839060205379	420.70292408078706
743.8540952448757	245.350866161839	324.14508408782166	411.9238327341724
713.1653414213324	252.98939883100763	327.66753173285923	408.21777939624496
711.3159476653874	254.61113461506795	331.3663192447493	404.9743078281243
704.5199665402847	260.34787462462	321.7954380979055	405.0822495075448
697.4116082060635	260.0262780200967	313.1559716135516	405.7254427165914
696.5076809944137	268.22169227895813	303.66634792778507	400.6320923079348
689.7579731516344	266.06285593626495	283.97075351851174	404.9497649933212
685.9032286222028	247.7314880027496	280.8730017767623	419.99801925912664
681.9267594352277	236.67800474402299	277.84309943753874	431.1221450634059
678.3052247025004	223.27575812329025	285.08616890299345	446.827257441376
672.2015220216034	220.07901568470146	285.83795325550864	453.22074231855356
671.768753089174	218.5565222751591	286.7034911203675	456.2657291376383
669.2624742392114	210.51003823600064	291.71604882029254	460.7348211236881
667.0342334754514	210.68498677370954	296.17253034781265	460.3849240482703
666.0112285758942	210.48768702321405	298.218540146927	460.7795235492613
663.4246193179833	202.55521646164226	303.39175866274866	464.76047439284946
660.3883493752624	200.65679248233363	309.4642985481908	468.5573223514667
659.1239795900027	190.82250027852064	311.99303811871005	476.0378053537272
657.3362760499024	188.0644030850969	315.5684451989108	481.5539997405747
655.0529786025177	188.31716896533908	320.13504009368006	481.0484679800903
653.9784705139241	188.1268853188078	322.2840562708673	481.42903527315286
654.5287158058165	188.58326540422428	321.1835656870824	480.5162751023199
656.2500468969193	184.9277902637047	317.74090350487677	475.26452103707595
650.9945046555531	184.92251135704936	315.82546209806	462.8485529608373
647.7936148822081	184.76724116489203	322.22724164475	450.9512778928795
639.6834831058769	186.95326345695432	326.3137255812262	446.5792333087549
640.1774398274391	187.17769695287356	325.3258121381018	446.1303663169164
641.7075464425891	194.08345415891628	322.26559890780175	444.4304724005373
644.2086533881436	198.57819890153093	317.2633850166927	447.4765575391864
644.822965892675	196.69897002206972	304.0353354635325	451.2350152981088
642.0064818503508	198.41713697564742	285.9934781767435	459.636094076672
629.7814669469708	224.9048536026968	252.1318880315681	488.29692875528326
634.567159532075	223.67270241399757	242.56050286135957	490.7612311326817
637.9449811071211	237.6298361721361	235.80485971126743	485.61057542587184
612.0611542910287	246.94052433159368	231.62601034127925	478.1784997073913
616.9178719830147	244.40575610692233	221.91257495730736	483.24803615673403
618.9061831300254	246.60062479141007	207.02338004190784	478.85829878775854
607.9793863952497	244.43259820767867	186.52864002312702	483.19435195522135
600.3331263580342	265.87536324745685	191.53628180395927	481.44833505006
597.8134933061586	271.2265562789339	196.57554790771033	470.74594898710586
592.9820703083657	275.1322790254866	206.23839390329638	473.21937429065343
587.8685513792691	275.7213969256354	226.95701509279894	472.04113849035576
589.9958726137273	276.8415357870723	244.37710783612786	469.80086076748205
592.9737924882212	274.50586177966835	238.42126808714013	463.36625969127044
593.6888188046482	277.0081697821563	236.99121545428608	458.36164368629454
590.7166771642285	277.0516158814981	242.93549873512555	458.27475148761096
582.7177913477974	278.2916207041344	258.9332703679877	455.7947418423384
582.7983670228666	285.17769274262065	269.92042982941877	453.1709085769354
577.7533908758463	288.04170574738623	280.0103821234593	458.73835945747925
574.165901370699	293.7221725608703	287.1853611337541	458.92583196941916
572.1553379655767	292.53768762850706	291.2064879439986	461.2948018341457
554.1279987931924	298.8145219795159	303.7121835902183	460.51562448140226
511.7851204191474	302.5031733880032	328.5400210152983	453.13832166442774
512.5418463767207	302.6559892288452	327.0265691001517	452.8326899827436
558.5093817348738	298.088430521042	320.78012487731485	461.96780739835003
561.3023708350877	275.8598956210935	315.19414667688704	481.871866098218
566.041300035579	258.2531478285929	305.71628827590456	504.6019410886447
569.2292625296946	243.8273027544887	299.3403632876733	520.7891708637427
570.4784608244984	237.6380293880809	296.84196669806573	533.1677175965583
572.3945779144005	224.08332420915417	293.00973251826133	547.3392444227829
572.0408430402224	206.76109167296323	293.7172022666177	568.902264882089
569.6312170175559	232.66710348485879	298.53645431195093	557.3221493246278
569.5894709544225	236.68684896126524	298.61994643821765	549.2826583718149
570.536361364215	304.15464112530765	296.72616561863236	506.78991436327345
571.2428755673923	318.3621007991757	295.31313721227804	478.37499501553737
571.3287145324946	326.0021792650707	295.14145928207347	463.0948380837474
569.72209538415	318.50049228529724	298.3546975787626	466.23094231358414
567.4983769609212	310.98211456107236	302.8021344252201	469.29975753139036
561.7176422864703	327.0645374090701	302.27540241701985	461.31131454959876
561.3609250671896	318.27658760358065	302.98883685558144	466.9276073453796
542.4630131955346	220.20497905040276	280.5058762477438	470.178714528063
538.0052809175032	220.29099380693572	289.4213408038066	446.5525117965284
566.1991198897523	320.1959903512377	313.7010432202105	431.1251023899863
529.0505777211362	224.04499722672853	294.45374857015895	436.33833066443674
656.7110225936319	466.23118289059244	325.4874003150186	387.22486240128273
542.1525592082851	283.6614653487378	296.6988213951321	382.32596323329034
546.5391368678067	338.57761898012484	287.925666076089	357.86987131618
558.7985527841062	335.45995946971897	263.40683424349	343.79501991587233
564.1238788575433	321.23542371528106	243.21492134831664	343.6203091798509
563.3058426186485	337.67327190165685	235.64337315982695	319.95223347337856
559.7528506765561	351.118420944229	234.02504023435728	293.06193538823425
557.8324843382678	358.0730761129114	229.57821754364937	270.8650696835851
555.4626577173972	315.0157740650458	218.56929338726513	278.23678678868924
546.9331344818115	279.723154449649	204.3899463693117	294.1548374135146
549.4034703993884	263.0634294867473	191.63005627236447	311.8358508157313
550.1532418371744	252.67607913537546	182.2586150777222	324.73865319940444
550.5909979701979	251.84281122542058	181.38310281167514	326.4051890193142
552.9336022859678	246.62722247732415	176.69789418013536	328.92165125994063
556.73605374548	248.84805366478017	169.09299126111085	332.35176977537077
557.9658068505204	252.65827329497233	166.63348505103022	332.5227634528743
558.0829540629663	254.90819306599056	166.39919062613828	335.7743658855474
557.8838663154179	255.44376853215948	166.79736612123514	334.70321495320957
557.9682202136705	256.8846651096588	166.62865832472983	331.82142179821096
553.671337569952	253.12754316115286	167.48133588282806	339.3356656952228
542.7339501754143	250.65721232718903	173.6244657984106	344.2763273631505
529.1136026634557	252.832777504166	176.73176393348584	347.9696626388106
513.7674306052123	262.04124422515173	191.1195790358118	354.00952271808035
504.2749542405546	262.87088466996966	201.61617546185477	335.37352922189973
497.28756951161245	264.37003120150695	207.2002556265354	332.37523615882515
491.943549612694	270.86404402454417	217.8882954243723	327.82710522644527
468.54941286806593	276.12926517558685	230.4756345065098	317.29666292435996
586.9756458873196	540.6749227912003	200.0040682316527	329.95520957271526
597.6779052047734	565.8790063454754	178.59954959674513	329.2441482240618
603.2762715998342	562.7544040626759	167.40281680662372	327.58426910553345
607.4858276468921	569.4900869265559	158.98370471250794	321.8052596919497
608.2196934804331	580.2354762534178	157.5159730454258	315.23877387111594
608.4320084817757	585.1445927789794	157.09134304274073	312.76118346718783
606.3714646325278	586.1346742109924	161.21243074123635	310.78102060316155
604.4778320906515	594.6034537832276	164.99969582498895	293.84346145869137
610.0492864279058	610.040116543558	161.01108967694574	277.27874099096056
630.7725351056139	624.7498224347585	153.77068287274327	268.38298353928803
610.6382164300684	605.4893484791293	147.93346107539213	267.3846236090248
561.7172325070578	588.2484859969561	148.6885370290944	250.08667289746762
532.8282036204421	555.6733016929927	169.09281047375936	228.03154473873903
495.1888630636495	328.0762664968998	200.71470396181468	215.47431914310468
498.43631187517434	287.1645426312472	213.87918850025937	205.55398345410282
518.4907856573974	295.4378095240013	213.39976999524404	195.61237117849976
517.5877598974859	294.2156460887238	215.2058215150671	191.6170848848693
522.205000428328	294.4435781620944	212.37530742655053	191.16122073812815
546.57733045549	297.18882295572064	208.09961901296532	192.02344138526695
547.0895302439875	281.4588628220646	207.07521943597035	185.6840879360156
559.8744200090096	281.29555605471313	200.05411629797538	186.01070147071857
571.3448015073157	269.96343363558645	195.34961900713947	190.43868060319562
465.7197768802347	419.9243091410396	187.88947190827668	182.13052472965558
472.4621688354219	415.6133089289833	180.23159811636302	179.09870491684643
481.6349007061287	414.1205573436297	173.20361017214793	176.42547018895448
487.97463599016623	412.767610471637	166.0300509289404	173.62545260807212
503.3223508295929	407.3254892735302	162.07747729387663	173.81255258676993
507.4583266773753	404.8717283940049	159.09432523700585	173.43127470712642
519.210414745653	399.5104883853947	156.53177575774086	173.68294139570165
521.5436856769996	396.0057347298107	157.0637117791737	175.49397082274368
521.9316646215559	397.23426677230344	156.28775389006103	173.03690673775816
525.0843398065213	400.6674373201806	155.16694151339172	171.35510363526527
526.9778974569713	410.0121850324781	151.37982621249176	168.08710625291923
527.4304326588019	429.59634323100556	150.47475580883048	164.12357518004924
530.3723585199567	443.48654154548785	144.59090408652074	156.1557330823652
599.9604407244831	459.23703251006657	119.06174812489238	157.80179528370655
641.378857127134	485.07597273061583	131.91110072527667	140.91889135376664
660.0160582045088	495.999227085843	137.59619687715582	136.25618196596383
695.0095065176864	493.0174362690289	127.98602196892583	150.84500955932424
702.1655845496626	505.2194612798125	118.06121521631299	152.76505540579467
694.8055244540948	511.3747369145811	124.26889989148748	144.71072189423793
690.0604181418888	513.1410508133235	125.29343187637159	136.94525377698926
705.6455442978606	515.041761357501	114.76679871926102	141.40128035056745
710.727596640663	528.3418341661635	104.60269403365612	143.0019506858884
712.0663535330552	530.0070852515831	101.9251802488717	139.6714485150491
713.0292160583491	531.4809384612365	99.99945519828398	140.5167866858072
717.7647622273928	523.6138340179999	94.30256018665807	152.47679824581886
720.9499306834084	517.6269922144508	87.93222327462692	156.73208315420885
713.0620932968156	524.9180567982462	99.89319078725201	153.594075768299
703.4919926009043	523.3446670004732	111.09445677734055	152.77138766297787
702.0186735393268	515.8552659015606	114.04109490049566	163.6078006963978
705.271780066825	506.7960535049409	111.88985167358766	177.3712556615487
708.7299076993586	499.2489767681931	109.499615582455	187.93938996111007
717.7161076138582	498.97105886067015	110.0999356232887	193.13840574361416
722.5178705156962	494.83735812424766	105.22684285086308	201.40580721645915
734.6438464028163	497.1886579584767	95.28220826816835	206.24141900903118
755.3768985632973	493.43424093787166	86.48743270599837	213.75025305024138
761.4993062907736	499.9058542792073	78.86336212350241	200.8070263675701
768.6182600169071	478.2757088087509	68.92377195813914	205.3824617263469
786.5591140365124	466.91051433744434	66.51422478191911	198.82470991384352
781.265867559074	474.9304141533677	85.19393336926407	174.6916946495287
786.7673880349404	446.8070866790204	98.38025215837465	166.4333902893078
800.1179333505643	436.6915245066592	92.35778076825723	174.257343089352
813.1743993098837	434.6268846287331	82.84022452818844	178.38662284520424
813.5865377037546	433.8040731643317	82.01594774044665	180.03224577400698
820.2609949715489	430.57497051420387	76.77489660236293	182.43651937551016
830.989387915708	429.1507540771547	79.29642509219804	185.28495224960858
832.2909828660478	430.59033244153756	76.69323519151834	186.487997355414
837.4968598054538	428.62703513860197	70.3348985453346	186.36117472865683
840.3913838419473	422.34799086473083	64.54585047234755	194.98139408422136
840.4212550942752	413.7215462131743	68.44200071893113	196.4107123823772
848.4965219025763	403.6092222932923	88.71775639056173	188.3038018868491
869.3553255292379	394.0082820630289	81.3320941872392	190.33970982237568
876.7554965782905	398.77435449400843	79.10568631818133	180.80756496041653
998.6101031966875	356.7973018262832	84.265771343948	168.42516774261776
1001.9204478487552	358.47054005794195	81.56890277951551	161.15487053959734
988.6913935808611	357.4029097174654	89.17349514369981	159.51942798622972
983.5923281757721	356.1780604465132	95.49456958206117	158.0920701563173
969.6992443930287	435.4552665627333	115.35482488789197	150.12999085733753
821.5448358518104	293.0052811961077	140.49099641895975	147.16976862067423
948.2952916485555	350.906150598869	136.1282891123292	167.26159578980247
950.3782274849667	345.64338628634744	136.73391769859614	177.7871244148455
945.5489233115486	337.37652257447	136.50747051906058	189.37832407541444
935.2169855621188	344.69285655206284	141.82590563621108	184.97594970803488
930.3567257237844	333.0322223164342	146.41116703605087	198.02670162563385
927.3902208755644	313.5467849151476	152.3441767324907	215.3616925927754
931.4371720833017	308.20963280344415	155.7889636861159	231.80534150073217
938.7771125780852	136.0117789504178	141.10908269654905	260.3307522383866
934.7094399728944	139.63973543404887	149.24442790693058	259.3266389763072
937.7345902861622	163.3841798388284	149.56966475241038	256.4665124708554
936.4579207340183	177.33617106243412	152.12300385669795	253.91704800219998
940.4050038093301	203.60974564893252	150.57273466857063	245.77717756667607
929.0271446694185	228.11089985808755	160.93535122330468	240.15072518617802
947.7592596003469	250.54395670980142	167.469222761862	245.56815594036652
940.0401402858607	262.634402393277	176.43207046273415	247.28882828581612
931.2779459342084	265.9844781663119	187.3070548716569	247.23808103412824
929.6206286589753	270.11904191906774	190.62168942212318	245.79589397944733
934.5393903357051	272.8445610500668	187.643139045409	247.20382869419478
938.4545185667153	274.3154978225012	186.64478842441613	244.26195514932587
942.1606566223768	278.0256123394981	186.0032627964038	236.8417261153321
939.9085118058242	280.4868113265268	190.50755242950896	231.91932814127466
930.2394917047084	280.5023904503386	203.20119719393546	231.88816989365102
904.3832061084851	279.6026094093734	220.67338463166635	233.68773197558158
897.9571972832005	279.14982854670995	233.5254022822355	234.5932937009084
902.623556708057	280.9487975060557	231.56462660525276	230.99535578221682
917.4751674742358	280.52127241939667	216.43022065754172	231.85040595553494
927.8345346625498	282.71805515294807	209.82847266785998	234.51533368190513
937.3834058329188	280.11577413954797	197.7255701559399	239.71989570870534
933.0184506068334	287.6824856237713	199.57451606263862	238.34840183120303
845.3272514570326	392.6827890592574	168.26703624967416	269.4859860915579
845.54826096733	367.1257344396196	160.97749516616065	265.8199188274828
938.5555794531612	295.933158397777	175.07271966158834	254.78751045306575
924.1710215635236	296.09977995408786	190.36125536154782	247.71397730078627
917.076129772761	303.6957998040999	197.66701297156004	239.40596357227497
914.8027882477763	308.133229055844	195.33850780671168	237.40629328360455
912.5768626609901	310.92751402387796	192.98353512873715	238.62454719908368
892.9682991681093	328.569981990372	198.2633106688624	237.2769627117319
877.7219804195313	329.9741726528541	208.1998904510953	234.46858138676765
885.9073858660636	348.20504269655544	177.89290395484062	260.71963151372114
730.2617791666602	406.2875590881393	172.86851917784338	254.57741548735487
713.2487219067484	409.8539752476107	153.28971261242356	247.44458316841198
661.4284310801065	410.26508098841543	162.92413475112227	215.2869851819409
634.3248034473093	400.9926029411604	181.4806339150324	180.35580712392482
625.0322444881286	409.0778739889689	194.36754704677065	164.1852650283078
614.3937861840061	410.5889197378199	204.36146883493996	161.16317353060583
610.0807396826649	409.33591434563897	207.24132673925317	163.66918431496765
598.0573320951021	418.5751840943572	207.96403879987162	168.51474793203852
598.4944295494214	420.1100985044486	207.08984389123287	171.36557612635374
596.8938858488832	431.08599233406824	204.337645286794	173.22693248917562
592.8893762474079	428.68309704424166	206.4058139761846	178.03272306882877
594.3149891893888	429.5621168987884	203.55458809222282	176.2746833597352
589.8283920301507	439.05491254052333	200.57237195360307	175.22220776190943
585.9926711672465	442.764842097931	202.32915601739666	173.7170063091089
588.2863951232019	447.9452181995222	197.7417081054857	169.27395391575035
588.9244860504839	450.99108370194097	196.4655262509217	168.95764879591889
589.0544784061374	461.8381274536109	196.20554153961479	164.51541540028776
598.5628162970328	467.6042030842395	182.86402769537352	164.33358801412976
634.1919993443948	483.17410076772956	155.33151598068707	176.91964702718724
650.2022245200247	499.8231934017789	138.9996851432543	180.22824062468501
646.3718195332921	483.21061523130504	166.72737024185267	158.2694903715167
728.9023958457583	458.72859181299793	160.31266972138846	171.41014479744442
643.7246100420682	471.22467321237707	158.30097609051734	162.08773338398166
643.5525048316058	480.63367365595167	153.59978312809946	158.40594264686104
654.4248302314453	480.84300544864163	146.59512310004217	157.98727906148113
669.3153414692587	480.04682161696496	155.17997596997816	164.37538114302964
720.569808762102	473.6007870989243	163.37167381122154	177.26745017911102
730.6695707237008	461.76040205107483	159.26198893781898	195.5849405915448
755.2872346584745	436.8043931714639	171.41564505574658	200.85042454169397
755.1614675332205	426.6148428598034	171.66717930625464	203.65590156904608
717.036439891506	392.81507290186505	159.33877943054142	224.0135987333804
783.8404344401067	405.2760342100475	134.01029885771646	223.15378912243236
794.233209338936	407.72670613496217	118.805411163846	212.6717831688148
806.4846675544121	409.0160234817053	104.63754310188769	204.92562429083162
813.7394790301605	415.3146813415642	99.74917763046464	197.13893731115064
819.0895555154826	435.0221554196721	98.27319729208793	185.3965070517375
804.7951268488628	429.2576853125908	109.20504783431173	192.51119556814604
821.7934044321835	436.07125739003544	108.1500769998085	193.00187326988757
822.9157445317999	437.29131785697	105.90539680057577	195.2570046284751
840.2171745147017	451.9386008980467	99.44397885262555	194.10388056417526
753.7318209613296	317.95370049011046	99.04663930142188	183.77234332386817
751.3132873185934	309.16390337309326	103.8837065868943	179.33396406035016
748.4534666868889	301.2224721620093	109.60334785030342	168.6945685293025
753.8407397198472	297.6084996442407	107.54455331837262	158.4910104968677
759.7872618606854	295.26431100669055	108.16236932036723	159.00910101074433
759.2278282716019	291.71843723604684	109.28123649853401	166.10084855203175
761.2532604904585	286.8801007531186	109.54395813098954	167.15034937755092
776.8513785969435	276.61354760704126	108.68374352424703	170.3485861804327
766.9900935217995	260.3888077004463	97.8352034526421	172.22695577172965
758.6311264956189	259.9214485365801	85.06622881275575	173.16167409946212
759.2186969894797	263.63918903553304	83.89108782503419	173.74015871390367
752.2441246851973	264.64338747041813	85.85515472787165	175.7267877460425
747.0734584751111	272.87283277657883	92.13832347180927	175.50055183865996
743.1753758637439	286.88848727010975	95.77112932535691	172.44939906671996
743.0752114559522	292.03580704652086	95.97145814094027	170.51590318596993
743.3966695570466	299.0245534300751	95.32854193875134	173.16001358494094
745.278322008254	309.76407274551974	95.74875339842359	172.5985567644866
747.1983420659045	315.9998100026497	96.09110719376905	172.67426398216605
749.4662991529112	326.6654639057046	95.74454176193552	168.1003511447766
754.3298830257561	327.4169789118181	94.24895830781765	166.59732113254955
756.73942856739	327.75167474816806	93.49798978948171	165.9279294598497
757.5288125636365	330.5491951959576	91.91922179698854	164.37833329244555
757.5375834531359	330.1392813532926	91.90168001798985	165.19816097777561
757.8583237120005	332.18231145906304	91.26019950026057	165.11957207962877
757.7597475493284	335.795378626043	91.45735182560466	165.88418107564092
757.4450179295811	341.85837962670917	92.08681106509916	165.7882572872487
757.5818300015638	347.99273821503533	91.81318692113382	165.57757835816724
755.9756671786844	356.08168224395945	91.01394427151351	165.44596348183572
751.6124561289645	360.3730167398908	91.74838992992265	164.85527093100376
748.1514104074133	365.77892450079656	90.67089772989436	166.04283087388788
738.168039305118	373.0889976492905	90.64295616320882	167.41843159392104
736.6568376277436	385.5112304204552	89.6466154929198	166.6864302018182
724.3035521374119	396.034069647873	90.40777511251909	161.60435932102536
724.3635857813954	402.20922769651736	90.2877078245521	161.0407467677737
718.5546347591772	405.21201803267184	90.15003983173574	158.95368944121577
709.8900494073024	413.15476252906075	91.93799440631555	158.60941657760785
705.017627694408	416.5641754175872	89.95119255374277	159.61168765279604
694.7638706874277	421.6725893585563	91.00040848043503	157.17817900576506
692.2247658584643	423.66587816911397	88.3317558644602	157.06503252160047
683.9629102027055	428.4200986125315	89.54973924040043	155.20945560255416
677.5835084129482	431.60687188976135	90.8496083329471	156.47519870607306
673.367172351794	432.67542527280017	91.56138304444514	158.19854064540047
671.8755631099575	438.5023092345101	90.64652975435361	158.23898804327388
673.8064846781482	436.5614308899541	82.90153319681012	162.12074473238582
672.8849342793708	442.6230070266863	84.74463399436496	161.42119065085558
675.89564411463	452.14785394315504	78.72321432384629	161.51811607412628
675.6238228410363	455.83129513717086	79.26685687103401	161.60470548236327
669.850412819069	466.28643446941544	75.8639281363702	159.3816127911216
672.2484889109522	466.5218591377663	71.06777595260381	158.91076345441994
671.1658758659989	471.46636099892714	69.67795479129235	156.13185423453413
670.4048388773897	477.7844043081623	67.70973414907202	160.94724071325837
670.8645685141942	480.71486921514406	66.7902748754631	162.136836963603
667.4486681805186	487.3117177540715	66.56984885680978	163.0475932577575
668.2019380238798	495.0527348788439	65.06330917008724	158.17153528641694
666.5427089348258	499.0562856127299	68.38176734819544	153.60264821076538
670.1618558946777	500.2124374434429	64.57428360365552	154.72115472450338
673.665380415102	503.798978673575	64.32670902920458	154.30754673063686
675.4652707489084	507.4185888546572	67.46567278652904	153.80707079340988
675.8409138507699	512.0074202021679	66.71438658280621	151.4647009157453
676.9051565396334	513.7109020476912	64.58590120507915	151.42820082318195
672.0901034907073	519.0919148727488	67.55128140509564	147.33090107090243
675.400706703314	515.1479166652975	60.93007497988218	148.56859082919416
674.2874414432385	514.2987491594445	63.15660550003314	147.04070938932676
678.3011231986969	513.4215497610468	58.372869180648365	148.79510818612218
689.4692729739015	510.72596665816934	58.32352158715793	151.0024241123172
696.254174001558	507.41405727610635	64.04181339226868	147.9821959462312
695.6990692664023	507.99836040242957	78.24358164004599	140.26781030485188
696.851214128217	488.02736973802723	82.75187484651788	142.74058551809912
800.5455734576335	510.37800283569857	97.09207889782499	133.23438641960414
801.4336727168591	502.80211002548765	91.69987329561368	144.77016495626594
804.3170515815029	499.95494062214203	85.93311556632602	157.86533904359422
807.1374588540659	499.9464922728047	80.29230102120016	161.67957321846683
807.7994516772569	508.6718939940597	78.96831537481803	159.25399835400435
769.577511459824	518.9751493556339	103.64180053154193	157.13691451590654
782.9941100342165	519.5054651300568	105.40425005490515	164.24646773053155
774.1239875921572	519.3844630374084	110.48114675299115	168.70958797783925
784.3095324141964	517.1939339716048	103.22825673484348	173.0906461094465
787.4456480702845	523.7600411050327	105.58916165391099	181.5412724207009
796.5171621690752	540.6180051356962	114.33822657095817	183.6814685122116
781.5233598593439	539.789979348011	139.66447724967423	185.337520087582
792.7949779712216	536.5822307226134	178.38713548038982	171.33105252021997
754.5912920199395	524.3337966000606	155.66683730019153	179.30664241819852
763.1873989572908	528.2052771854039	138.47462342548883	176.83556905418078
768.4926598011441	535.7011451391083	127.86410173778211	171.75647166784358
775.4616785522037	539.1494966989733	118.6318240920258	169.56552840447654
778.5567596124938	546.7573942615506	116.96244850975708	167.91209289425626
782.3957916921538	549.4589737904906	113.75262397006216	166.97717345600148
784.6337498600926	553.0076227139602	113.67774026586943	168.68194087243216
783.3528366238141	549.8676316135138	116.23956673842642	166.11099003226235
783.1199846046486	543.3971510351691	112.27617934197531	174.62285975416975
910.456547906347	485.1738729331731	131.5751129909482	156.32905845699645
912.2964361275695	491.4183645473581	132.42506892611198	143.8400752286263
910.2648296237787	495.6656567133914	136.48828193369366	139.69519453036418
908.4098681491008	508.8656870780688	140.19820488304927	135.04149772067774
909.6389648105863	508.91354526433764	142.07430487915371	134.94578134814003
907.5060306023493	517.1088219373577	146.340173295628	131.64170779430725
908.1945296149125	521.6406330006645	144.96317527050132	131.33036016504312
908.2252668873098	528.3259595514751	144.90170072570677	126.65921695996201
914.2390262662575	532.4744862979645	137.14831884053427	126.91043721242906
914.1832352901915	531.6316514381132	137.2599007926662	128.59610693213168
914.3741686088613	542.0019716698849	136.87803415532667	128.786231279517
915.2785146730342	541.8915171578102	135.06934202698093	129.0071403036665
913.7714375372939	543.5657143410147	133.92508549386454	129.81715674185466
910.8617024530993	547.8917825087382	135.59126047781916	129.47161077527704
910.3086944091725	556.5252068467599	136.69727656567258	128.9005233406415
899.8570947244735	555.7440750204246	140.87170814435757	130.46278699331208
898.3196414479387	554.5091850699474	143.9466146974273	132.93256689426653
898.4349268957802	558.0988855305654	143.7160438017442	134.47204502330095
895.0697765829902	566.0995647324435	146.06603435315094	131.61161684206542
893.3595562662713	566.5314443909048	145.1150799822385	130.74785752514282
891.5638087229968	572.9897055710073	144.36375004201096	130.85981024526762
889.6149330793272	572.8956351247303	143.92857651228707	131.0479511378216
888.3487986968054	574.4123489385744	142.1316941434954	132.34367464396882
885.0318885995476	577.753154344088	144.44375474420787	129.98382342674464
883.6220862064915	577.7869145289001	142.94316547264464	129.91630305712061
873.9224422089059	581.3068041630763	145.15935322467323	131.46807391033937
872.9670211377878	582.0199292493927	147.07019536690922	130.04182373770658
874.1805026217545	582.5607979645824	144.64323239897587	128.9600863073272
869.8715382464623	591.2949673624071	144.64727376630145	128.7195222781956
868.3608722118084	592.4832788188555	143.36544414490214	126.34289936529876
866.4483314386366	593.3650064269567	142.94526563475972	124.57944414909636
864.6956120210489	595.1653574110716	142.24019959622723	125.1892470545747
861.228305626494	597.3577394792748	144.9654656326452	125.01382967086005
861.1770493279004	601.077219314712	145.06797822983256	126.07234803401836
861.6072901588697	604.3032434116574	144.20749656789397	123.88760574578257
863.0266493210136	606.5771383305919	141.36877824360604	123.55875320639673
861.9259038429441	606.6584937555975	143.57026919974516	123.3960423563853
858.0396677499704	606.786920053463	147.141549627524	123.13918976065455
855.370736434383	603.8422525017469	152.47941225869872	124.77633327575904
853.8221916146329	601.6992344424154	155.5765018981989	124.70158952292778
854.0157194538928	595.8567436550454	155.18944621967927	127.57231509324382
856.3649292235368	593.8448268063569	154.9386549003423	131.59614879062087
858.3459645672048	592.6596682203996	155.48519847890176	133.96646596253544
866.0229827875883	593.6768901699435	153.79659310133815	131.9320220634476
870.8180349459952	592.6073514437061	153.1992257306767	134.07109951592244
885.5931397141428	590.4933397456841	150.77762155423238	138.29912291196635
891.5350489779738	588.1866301371857	138.89380302657037	142.91254212896328
904.356645371951	583.9217142652296	135.43952215515588	147.0045914895674
925.7227216392594	577.3711106163306	114.94240221486359	151.2117857496358
945.3208805000023	578.1694149107434	100.83606775850126	149.6151771608101
960.7787324949804	578.2735982840594	81.69646733137846	149.4068104141781
965.6659774029747	579.2991416793393	75.52213569299127	147.35572362361845
973.4743288682978	580.2818615222218	70.29747172234897	145.39028393785335
979.9197137812989	583.6924851552852	70.78589066530171	141.91383386396532
982.2106040096374	579.1832271368307	69.50655827688769	144.32745376434752
987.801687176515	581.6152349164811	68.27097863808098	142.77896710336324
987.8839435419253	585.2931355706053	68.10646590726043	138.69459787347262
995.2796336222125	579.9781629400452	66.1508051568276	142.90668342952173
995.4202437758033	575.0521514868666	65.86958484964589	146.28611846301925
988.8669367092572	572.7335574866868	75.69571589639159	147.64282337703233
996.2567387733772	563.7144665589256	67.85854757256931	151.79613362371958
996.1119414271634	580.0359782005536	71.54354346435281	142.92091873595385
995.0520005588464	581.2637946163359	73.6634252009867	140.46528590438916
996.1642172493735	576.8200581588512	71.43899181993275	142.69110079267378
996.9296222322614	564.7322448218196	69.9081818541567	156.89134295429034
998.2706240487614	548.3714192331544	67.2261782211567	172.08618732032727
999.5103663834906	542.0586906464072	64.74669355169843	181.03450433224663
996.3307555346852	546.3282880420109	71.10591524930929	180.0167173330945
993.1022774666493	532.03365660454	77.5628713853809	193.1636322468744
991.4413241126439	524.2220647816487	80.8847780933918	200.45660107372038
991.1300378991285	529.2406394561549	81.50735052042258	190.41945172470798
970.496380844788	437.5573807591078	118.57910044298133	164.0077598126798
922.3511021449173	329.50193512991433	99.53918862894037	193.81558541803338
904.4276757668454	321.1973681064682	103.46794112656123	201.30526224820483
907.2965074453449	315.40806548872513	107.20497567096785	208.14651853298824
915.4387548455691	308.94172320206116	105.6269282510562	221.07920310631619
907.2718981263722	299.61865520911124	111.83258374309575	224.53325217268468
904.3766212890996	297.1834623592553	117.62313741764089	224.1813993519878
903.5052565525474	290.427577974707	119.36586689074535	227.0592615804409
904.3426959289169	285.4360911993293	123.08019605631989	231.6530272128827
900.698718258486	279.9923088602997	130.3681513971817	231.4994968624593
899.6730372752986	275.10153095473515	132.41951336355658	235.63826010549468
900.1764838430489	273.17273486822796	131.4126202280559	239.49585227850895
897.251845290403	271.3755638498842	137.2618973333477	243.09019431519653
895.3059446275491	271.9876190616703	141.1536986590555	241.8660838916244
895.997740847513	271.04309232440784	139.7701062191277	243.75513736614923
898.1480319602076	268.92505633975856	141.45353540190564	247.9912093354478
901.5674897733825	267.3548702864217	140.68996541116886	251.13158144212147
888.296690700975	456.9816398861935	167.23156355598394	250.6255927130111
871.7387816719933	461.24132264180633	193.79979852377113	248.65381029196155
853.5423442145114	460.4726391804897	223.23830002040376	250.19117721459486
876.4692007216731	273.3186602353735	199.74227036656333	289.13388469758434
882.0143866149095	309.32241326781826	188.65189858009057	332.1252833362306
882.5146679622944	276.63706778847694	187.65133588532092	348.7577683727076
881.3340463261741	278.53034625941234	190.0125791575615	361.67439966616536
880.0771859233396	280.119626521829	192.52629996323054	384.2424219561109
878.096837052756	278.6254294981667	196.4869977043976	414.10076300914415
875.0880715750484	276.0304092099994	202.50452865981293	428.75245465964144
849.2013973682579	271.8286483553195	224.9374933946101	437.1559763690012
834.8156373091302	270.4320448279848	233.12521963935475	439.9491834236706
804.0312813419364	277.4108907630285	263.27269752462644	436.465236236622
813.7478559105542	275.2925957047422	276.64390518965007	440.7018263531946
776.6972586431702	276.4489863682725	294.6316929823725	438.38904502613406
771.2143130093721	276.7381082055873	305.5975842499688	437.8108013515043
770.4177551213182	275.218135922585	307.19070002607646	440.85074591750885
769.2023471505288	274.2078650651667	309.62151596765534	442.87128763234557
767.785146984829	268.88231033722326	312.4559162990548	441.71865608874873
767.1757578096839	269.5283705767391	313.67469464934516	440.426535609717
767.7230629149592	269.72538944340397	312.5800844387945	440.0324978763873
769.475926873212	261.3377710040441	309.074356522289	456.80773475510705
768.7276986550811	253.10865419219488	310.57081295855073	473.2659683788055
762.442798242753	246.27016205070112	323.14061378320673	486.942952661793
754.8319610629512	247.48601756216522	338.3622881428105	497.2030958283585
752.4979092758492	245.2897989861024	356.1293266710321	501.59553298048417
754.2055084256663	246.42200812926336	366.17295507588176	499.33111469416224
752.403517463202	248.16950273079442	383.36653488090116	495.8361254911001
752.0483684082876	247.19120745080593	384.0768329907297	483.97535547252045
756.2843112708903	246.32626331397591	375.6049472655245	472.05778055848737
756.3264699224269	246.9565756173912	362.19323258587576	470.7971559516568
759.8359905540931	252.46000987621989	355.1741913225433	459.7902874339994
763.2846494973685	255.98233811107238	335.46925037131683	452.74563096429443
764.3473995780259	256.2628692323066	333.34375021000176	452.18456872182594
766.4469448686145	249.93607190831128	329.14465962882457	452.5030814851754
759.1825854578167	242.1319556141459	319.131318230783	455.8402839636874
762.8241135458292	240.81278515160517	311.8482620547579	458.4786248887689
765.387292098827	242.773637602125	306.72190494876224	454.5569199877292
760.1856508308354	245.45258499396337	305.1931912440903	449.1990252040525
759.6121029323442	238.79925720931328	306.34028704107254	450.6797248982415
760.621683392393	237.1073057584744	304.3211261209749	454.06362779991923
754.4166953268068	235.3689345976895	304.8463796333373	457.54037012148905
754.4263628975973	234.0179745981033	304.8270444917563	460.24229012066144
753.9265441963005	234.56808362127452	305.82668189435003	459.142072074319
752.7180852138014	234.33989691237625	308.2435998593483	459.59844549211556
743.8979617722175	232.92310694702226	313.8507189489993	462.43202542282353
735.7402849772443	232.1614079674785	317.99725772086333	463.95542338191103
736.2549108663504	232.4267148875544	316.9680059426513	463.42480954175926
737.3558776347635	231.09324153447028	314.7660724058251	466.0917562479275
737.3390186105983	225.3030103639205	314.7997904541554	465.43310946473576
736.3705037347688	219.65975492762328	316.73682020581447	464.4898692235506
737.5072333561786	232.78550735474929	314.4633609629948	450.4860145546149
731.8987799025621	269.81706332081194	313.681528538136	424.41785995085735
726.2318315795285	284.6008336350946	325.0154251842033	406.44118153904196
699.5469617526437	302.9483015720841	343.8817307442878	392.7485350608529
638.6533399661789	315.08040195343034	372.9162263916247	380.07842778885947
554.1385874374255	326.0094816874194	411.5071877525229	370.07831774784574
547.1146412478262	326.99055465813046	437.85918972164086	368.1161718064236
592.866080897431	338.7302323243263	435.1207892020402	369.99809612534875
637.7197153224417	335.79104719956166	421.42550568863305	375.8764663748781
645.4066935075965	340.4233200783045	406.0515493183234	379.1627337588461
648.5613648486615	341.58439163008643	399.74220663619343	376.8405906552823
650.8232157246488	348.109234477279	395.21850488421893	376.01922576282743
632.295417099426	345.51920555417115	395.8404965580427	381.19928360904316
625.2926502739667	356.7718826001332	397.60972634841426	383.1665372382132
603.4604985705644	359.9303844061594	404.3885400367782	376.8495336261608
573.2920272351673	372.4311625120535	415.52127994314725	376.4500787965852
607.0631760734577	374.07765697411946	422.7881519563144	373.1570898724533
621.0672649815729	375.54108440911597	407.3084513916459	370.2302350024603
628.7846769578432	387.4482738601956	391.87362743910523	370.8983013908478
635.8358816989532	396.9383271479082	389.7822388362441	363.9292156947814
628.6790072061037	397.24538360042146	392.2282618620411	363.31510278975486
625.3175173372065	397.5100542332785	387.0550991467366	362.7857615240408
626.2672084824178	406.04756616947753	385.1557168563139	357.51770877945216
626.8876959186191	413.2099479371745	383.9147419839114	354.88656490801066
626.7979107758913	419.56323769656126	384.0943122693669	353.8124062583691
621.9764642443249	432.3045888767875	382.1190735977499	351.5659673674164
626.6680876042622	432.0628002269683	384.2874171455051	352.04954466705476
616.70940155496	433.3475914759656	392.61171029574666	349.4799621690601
616.1344782842629	440.2594620858177	393.76155683714086	347.3377681005096
629.3028267875169	439.8815954920523	390.7551189514784	348.09350128804033
634.7712103056692	444.317701638897	379.8183519151738	350.85185028930005
645.0450768682863	445.567787736681	370.7749754125251	348.3516780937321
653.9624511373925	443.6874589989982	364.26367962667973	352.11233556909775
648.7984385871646	444.8448180900749	363.310598420425	349.7976173869442
650.5460631644052	444.52781171392905	359.81534926594395	350.43163013923595
651.7734162161039	451.51259436378444	357.3606431625466	347.64681258959774
628.6386389916194	447.2279565496812	359.2213330131354	356.2160882178042
637.7554165465197	455.42157492654553	363.52119028952836	351.0955576571723
620.0665209646368	462.8241594845225	376.3922179700818	347.5437702828247
615.4224112661739	465.67046970735515	385.6804373670075	341.85114983715937
620.9661423879547	463.9805831696415	386.04496656907634	345.2309229125868
635.1731548395844	473.0282867859944	380.6542832196802	338.6471864568123
647.674772478847	471.72040107093346	366.97379996120276	341.26295788693415
649.9076847649734	471.68554379262446	362.5079753889499	341.33267244355216
653.20510094827	469.2188463734795	355.9131430223566	346.2660672818421
655.3413111652994	469.783147996631	351.6407225882978	345.13746403553904
655.9730611739744	470.25121429560596	350.3772225709478	344.20133143758915
627.3267480214074	471.26144327706817	363.9173014866909	342.18087347466474
638.0953185088648	476.6101803751018	364.6168385782257	342.6017383118221
646.8934002807965	479.3334177693878	358.1566263387979	337.15526352325014
656.3046671495993	479.7721709343057	350.2826373898798	336.27775719341435
665.472725601645	476.73211057992665	342.75793282653035	342.3578779021724
676.0713268637948	464.1986560935618	332.3499552081921	356.63556196894086
681.6043682785439	431.23191108171716	321.28387237869373	379.17513039245796
690.9344825904739	418.0776577987874	313.64507171561274	394.46220899753865
708.8974778631709	408.11487494686685	299.9853290715222	403.25465075072793
708.9544997487703	404.59139233872	299.87128530032345	410.3016159670216
706.6274848853532	403.134606882749	304.52531502715783	413.21518687896366
705.9578331005432	401.21606488100514	305.86461859677763	417.05227088245135
707.146897233956	400.7946987980691	303.4864903299523	417.8950030483235
708.3075556073414	400.98838508909716	301.1651735831813	417.50763046626724
713.3789686179603	401.07551379803516	291.0223475619438	417.3333730483913
712.4031210459989	396.0953113558569	292.9740427058665	416.1829953088458
711.5405258045905	397.0472787901352	294.69923318868325	414.2790604402893
711.4339991718714	392.1649565529464	294.91228645412133	412.918465881991
712.1827360688243	388.9727046752844	293.4148126602156	408.1948233877224
718.9288313238617	389.6739179926684	290.93456724437493	406.79239675295435
725.3619932821123	382.5060433574957	289.018133499333	410.1782558518404
737.0918513074397	385.88454735335284	287.4975369511326	403.4212478601261
736.7321925896481	367.5626653673355	288.2168543867159	407.53824394452766
740.0970795856298	368.24020038826495	292.4034967667901	406.18317390266884
745.5530871700719	363.6279314888901	292.4563066017789	404.44288669754565
745.933212280225	357.8021761123989	313.57467444893723	405.1550884167957
822.1778329186225	353.42730055647985	307.9280355674723	413.9048395286339
738.7515707572561	355.12694198630373	327.4024550797303	410.50555666898606
746.9516692340361	347.1664813982268	334.20657939810417	414.82431720917316
730.9487339691423	335.31515389205094	330.8764417952269	438.5269722215249
732.8573421871346	326.65229561564985	314.9723218327322	455.852688774327
738.0680759420814	327.69889799010394	304.55085432283863	465.84766907843107
741.2673675374108	331.3473593853406	298.15227113217964	458.55074628795774
743.4075118638332	333.1622773675927	293.871982479335	431.2219795072248
745.4969867147108	333.16403911843247	289.6930327775797	419.8509840784024
742.2696285731195	329.71922649074656	285.0209268535517	415.61378712656347
742.2659988548846	331.8279514969552	285.0281862900212	411.39633711414615
742.5527880017172	333.4648491094147	284.4546079963562	408.12254188922725
743.4662216109134	328.1465587638124	282.6277407779636	407.8959520511793
744.3788033580621	328.8632400455459	280.8025772836663	406.4625894877122
743.8538225126181	332.0087040932984	281.8525389745543	400.1716613922073
744.5513958019487	331.87447994590786	280.4573923958932	400.44010968698825
745.1384903620417	325.2527923612424	279.28320327570725	403.00238966019015
745.1545832397717	325.8528480625905	279.2510175202473	401.8022782574939
744.7555588458379	327.9576346621412	280.0490663081149	397.59270505839265
744.9867119156099	322.39911662290206	279.58676016857066	398.0784289671751
745.9149089272297	321.6997348296554	277.7303661453311	399.47719255366843
746.2455323925906	322.47691873898924	277.06911921460926	397.92282473500075
745.5062233538579	323.00302623843436	278.54773729207477	396.87060973611057
746.94180690565	323.9822115357033	286.27219720109815	405.5078661541802
808.6740987775875	320.0743896488022	303.9049730315402	402.46986688380423
729.3199091046221	315.8787535398361	307.25665959496905	399.76423247441494
721.1894402486679	315.2097596842233	334.62793262524747	401.1022201856406
776.5070833210102	312.6833186864114	339.73737298846646	406.1551021812644
775.3706918299717	315.82482641515617	342.0101559705432	399.8720867237748
775.0617911485183	317.75359140842806	342.62795733345024	396.0145567372311
774.7444311420089	317.68569948274876	343.262677346469	396.15034058858964
775.4573549231873	315.2959667055881	341.8368297841122	400.92980614291093
773.7264077838809	315.23466841000493	345.2987240627251	401.0524027340773
773.5918997854599	315.95534876913814	345.5677400595672	399.6110420158108
767.7369957051782	318.9273551950778	345.5501672475475	393.6670291639316
762.8259669087558	323.0558990714585	343.73717614773324	385.40994141117017
759.7749940159299	327.49042721425053	349.8391219333852	376.5408851255861
764.3467626295036	331.51036348306116	363.56983043651053	368.50101258796485
759.6866436281888	331.01651347154734	372.8900684391401	369.48871261099254
768.666450578411	332.6975347769694	378.3124020363075	366.12667000014835
769.0993907214977	339.79719266073874	377.44652175013414	363.6504115250474
767.4821709181685	341.88714119078816	380.6809613567923	371.14082673866574
759.6975847772812	342.2509557857628	384.4106587460923	370.4131975487164
759.2797042789117	340.08835504170247	385.24641974283145	374.73839903683705
760.0601953390114	341.26238985965205	383.685437622632	372.39032940093796
759.2979622775575	350.427456023894	385.20990374553986	365.96656989692974
752.5497514346357	358.286165543572	386.8777451144416	362.0777311745158
756.8632072834914	361.0410554349703	378.25083341672996	356.5679513917192
754.7415596332808	366.6173520058322	382.4941287171515	356.98604807206004
754.8089752300688	374.1258131355711	382.35929752357544	353.61275072904505
748.47818781149	382.2301971231457	383.43297185052455	348.9918832641042
748.0789916338581	384.146571055689	384.2313642057884	345.1591353990176
752.6750992933848	389.2070925955557	375.0391488867348	335.03809231928415
793.6106232635002	394.5060740707969	371.4132753805667	324.4401293688017
791.3437954293643	384.0211072664754	386.89900869008386	334.45798533619967
817.9368993939847	360.0207616270007	424.5323652998927	348.4013399130055
802.6050386558277	347.6296203840027	455.1960867762069	361.02620808114466
794.8813782157247	343.8591804388431	470.6434076564128	368.5670879714638
793.6574846574108	340.9302893557615	473.09119477304057	374.42487013762707
791.9508070786924	340.34100981235974	476.50454993047754	375.60342922443056
808.2903039952587	340.02529369298486	457.22103894249074	376.2348614631803
815.7120143821867	341.14254923025214	442.3776181686349	374.00035038864576
818.1605396507391	338.9878992393043	437.48056763153	378.3096503705414
817.4889392801624	337.6887981317474	438.8237683726833	380.9078525856553
817.6254561929309	336.1446097075447	438.5507345471465	383.99622943406064
814.4762373868086	335.7929653428241	444.8491721593909	384.69951816350186
827.773744134164	342.39267480028394	431.3093293416777	384.55526992557964
879.7854824892343	357.2356689050325	404.34376934997715	393.39824007530257
889.3598469639808	356.9250684904648	385.19504040048423	406.5820115619005
896.8499651660032	358.54831514230005	370.21480399643923	415.8033109713789
896.574337645311	361.9119384529257	370.7660590378238	409.0760643501276
900.7292902151805	362.97589590155593	362.4561538980847	394.67087639908334
901.6697325136613	369.1648797490958	360.5752693011233	382.2929087040036
904.6543179870823	372.19650104044865	354.60609835428124	376.2296661212979
904.9546707941577	374.18822007366026	354.0053927401305	372.2462280548747
908.0380772705198	371.01892710347545	347.83857978740616	367.14868249140477
917.4333667041867	369.4811842826782	340.30661618499323	370.2241681329993
911.1285092955242	368.93659466269804	352.91633100231843	371.3133473729596
912.2604016133313	368.0687895196761	350.6525463667042	373.0489576590035
911.6418431199266	368.4679072136472	351.88966335351347	372.25072227106125
915.6038402130325	371.6737994146179	343.9656691673018	365.83893786911983
877.8090666223889	373.5591438762232	352.4950261305713	350.89155057623975
918.3257699940488	372.7003515417778	360.07719353354213	330.45524170855776
906.3787532254546	364.8335756486349	383.9712270707305	313.57271887819365
901.9490957250656	372.09261395382225	403.8014912485684	299.05464226781896
925.0797763663791	377.0980441656803	423.76710105874156	289.0437818441029
880.3214378365556	376.7367339507882	423.8827251871917	289.766402273887
880.735631272629	378.9399535918943	434.2431820375763	285.3599629916748
906.9280929340377	379.3718820651617	438.21592525304277	284.49610604514015
892.8826474624285	378.62231799612	443.6733229362046	285.9952341832235
899.3281520392896	378.43485242524406	442.2058864225103	286.37016532497535
916.8655598443124	384.09160789746466	441.35457905979996	286.46449046297926
908.6128777467038	391.8045229196689	446.4632977042612	282.43530596932675
897.3037710925772	389.93677200041566	434.86403571963524	286.1708078078332
936.3318308452873	378.9700612850861	424.57405398339347	296.8098729436293
961.5743837154741	368.12693812966825	396.72043874010984	307.18037400591993
978.5213948886321	366.4291575102712	373.88902460173546	310.57593524471406
