# Supplementary material
Source: ML conference proceedings conference paper supplement (https://proceedings.neurips.cc/paper_files/paper/2022/hash/1c8c87c36dc1e49e63555f95fa56b153-Abstract.html)
Supplement: Supplementary file 1 [file 1c8c87c36dc1e49e63555f95fa56b153-Supplemental-Conference.zip › GOT-10k-Results/VLT_SCAR/GOT-10k_Test_000092/GOT-10k_Test_000092_time.txt]

0.036699
0.020363
0.020563
0.020493
0.020540
0.020482
0.020445
0.020529
0.020436
0.020029
0.019971
0.020834
0.020972
0.021269
0.021220
0.020906
0.021088
0.021687
0.021735
0.021294
0.021439
0.021338
0.021586
0.021467
0.021052
0.021129
0.021794
0.021604
0.021631
0.021230
0.021122
0.021363
0.021381
0.021579
0.020927
0.021268
0.021285
0.021688
0.021417
0.021379
0.021987
0.021290
0.021233
0.021905
0.022275
0.021851
0.021998
0.022296
0.021622
0.021576
0.021535
0.022840
0.021234
0.022639
0.021779
0.021113
0.021328
0.021122
0.021044
0.020953
0.021128
0.021141
0.020526
0.020697
0.020505
0.020556
0.021126
0.021416
0.021667
0.021765
0.022187
0.022186
0.022146
0.022050
0.022031
0.021417
0.021868
0.021915
0.021768
0.021718
0.021655
0.021741
0.021685
0.021532
0.021336
0.021230
0.021319
0.021296
0.021266
0.021659
0.021199
0.021271
0.021408
0.021409
0.021673
0.021134
0.021452
0.021567
0.021368
0.021524
0.021495
0.021585
0.021586
0.021993
0.022912
0.022641
0.022484
0.022589
0.022784
0.022693
0.022719
0.022755
0.022732
0.022650
0.022534
0.022798
0.022568
0.022045
0.022246
0.023459
0.024011
0.024081
0.024325
0.024630
0.024427
0.024348
0.024324
0.024461
0.024139
0.023450
0.023498
0.023078
0.022979
0.024048
0.022856
0.023220
0.023238
0.022855
0.022609
0.022332
0.021986
0.022426
0.023188
0.023286
0.023612
0.023818
0.023579
0.023385
0.023076
0.023205
0.023400
0.023315
0.023773
0.024263
0.023998
0.024017
0.024032
0.024350
0.023213
0.023139
0.023017
0.023114
0.023247
0.023397
0.022779
0.023150
0.022890
0.022911
0.022957
0.023315
0.024039
0.024148
0.024085
0.023926
0.024179
0.023242
0.023644
0.023647
0.023263
0.023652
0.023883
0.024054
0.023995
0.023763
0.024031
0.024104
0.023760
0.024012
0.023954
0.024096
0.023640
0.024272
0.023920
0.024615
0.024749
0.025091
0.025050
0.024819
0.024796
0.024904
0.024661
0.025171
0.024611
0.024605
0.024709
0.025000
0.024781
0.024694
0.024793
0.024585
0.025650
0.024574
0.025193
0.025056
0.025267
0.027981
0.028070
0.028388
0.028737
0.028407
0.026542
0.026958
0.027203
0.027369
0.026363
0.026196
0.024805
0.025086
0.025378
0.025010
0.025094
0.024149
0.023638
0.024477
0.023569
0.023354
0.024887
0.023752
0.023378
0.024072
0.024384
0.024628
0.024451
0.024711
0.024280
0.025972
0.028218
0.027949
0.027277
0.027171
0.027311
0.027031
0.026391
0.026247
0.026272
0.025696
0.024473
0.024439
0.024469
0.024226
0.024530
0.024286
0.024245
0.024203
0.024249
0.023723
0.023427
0.023256
0.022942
0.023814
0.024042
0.024284
0.024438
0.024161
0.024544
0.024542
0.023917
0.024596
0.024060
0.024522
0.024471
0.024078
0.024261
0.024005
0.024096
0.023656
0.023719
0.023467
0.023774
0.023876
0.023454
0.024068
0.024136
0.024680
0.024286
0.024413
0.024778
0.024510
0.022763
0.022734
0.023424
0.023735
0.023820
0.023382
0.023486
0.023524
0.023364
0.023442
0.023432
0.023417
0.023591
0.023633
0.024029
0.024433
0.025212
0.025398
0.024786
0.024849
0.025300
0.025313
0.025316
0.025662
0.025437
0.025741
0.025149
0.025071
0.024011
0.023836
0.024753
0.024471
0.025175
0.024628
0.024879
0.023884
0.023334
0.024209
0.026321
0.026293
0.026330
0.026047
0.025546
0.026501
0.026598
0.026382
0.026780
0.027343
0.028643
0.029380
0.029597
0.030488
0.030790
0.030574
0.031625
0.031269
0.033056
0.031927
0.032684
0.032276
0.033738
0.034831
0.035469
0.036134
0.036729
0.030571
0.032642
0.033106
0.033424
0.032623
0.033339
0.033101
0.032487
0.032059
0.031567
0.032240
0.029871
0.030069
0.030249
0.030315
0.029746
0.029533
0.028968
0.028082
0.027742
0.027071
0.027456
0.027392
0.027815
0.030239
0.031318
0.031788
0.032419
0.031149
0.031174
0.031302
0.030543
0.030919
0.030758
0.029559
0.027974
0.026838
0.026747
0.026548
0.026000
0.025884
0.025830
0.026017
0.025927
0.025768
0.025445
0.026526
0.025969
0.026313
0.026303
0.026643
0.026507
0.026612
0.026581
0.026643
0.026219
0.026681
0.026462
0.026111
0.025406
0.025207
0.027083
0.027411
0.027076
0.026906
0.026644
0.026946
0.026462
0.026292
0.026605
0.026087
0.025697
0.025450
0.025384
0.025491
0.025254
0.025588
0.025350
0.025346
0.024987
0.024755
0.024602
0.024636
0.024704
0.024707
0.024558
0.024458
0.024814
0.024906
0.025206
0.024889
0.024299
0.024022
0.024018
0.024016
0.023869
0.023610
0.023753
0.023432
0.023593
0.023596
0.024529
0.024682
0.027165
0.028039
0.029811
0.029172
0.029917
0.028579
0.028757
0.028844
0.025541
0.025877
0.025779
0.025901
0.026315
0.026049
0.026099
0.025956
0.026635
0.027363
0.025880
0.024640
0.024090
0.024318
0.023530
0.024215
0.024266
0.023978
0.024817
0.024538
0.024296
0.023862
0.023751
0.023740
0.023559
0.023503
0.023580
0.024260
0.023537
0.024035
0.024317
0.024794
0.024453
0.024165
0.023700
0.023798
0.023584
0.023447
0.023943
0.024439
0.025036
0.025157
0.024891
0.024140
0.024339
0.024231
0.024228
0.024148
0.024612
0.025242
0.024929
0.024645
0.024537
0.024527
0.024931
0.024483
0.025426
0.025233
0.023858
0.023507
0.023709
0.024125
0.023800
0.023711
0.023277
0.023469
0.023438
0.024048
0.023961
0.023860
0.023955
0.023943
0.023406
0.023254
0.023431
0.023116
0.022753
0.022945
0.022989
0.023155
0.022805
0.023080
0.023165
0.022506
0.022933
0.023925
0.023707
0.023124
0.023378
0.023160
0.022734
0.022932
0.023114
0.023066
0.023160
0.022984
0.022975
0.022895
0.022963
0.022953
0.023348
0.022352
0.022615
0.022508
0.022777
0.022116
0.022376
0.022148
0.022300
0.022466
0.022639
0.022388
0.022152
0.022200
0.023239
0.024351
0.023732
0.023467
0.024305
0.023549
0.023101
0.023476
0.023097
0.023049
0.023472
0.022759
0.023245
0.023308
0.023285
0.024385
0.024720
0.024249
0.024164
0.025752
0.023766
0.024160
0.024673
0.024303
0.024236
0.023883
0.024010
0.023764
0.024621
0.025918
0.023934
0.024052
0.024184
0.024205
0.024103
0.026172
0.025515
0.023979
0.023859
0.023666
0.023591
0.023671
0.023136
0.023344
0.023964
0.023606
0.023595
0.024661
0.025443
0.025807
0.026552
0.025946
0.024377
0.023854
0.023403
0.023530
0.023687
0.024233
0.023794
0.023382
0.024206
0.024072
0.024141
0.023738
0.024061
0.024120
0.024059
0.023905
0.024112
0.024020
0.024098
0.024257
0.024501
0.023975
0.024026
0.024254
0.024131
0.023711
0.023699
0.023874
0.023651
0.023741
0.023643
0.024068
0.024225
0.023508
0.023950
0.023657
0.024200
0.023736
0.023608
0.023789
0.023815
0.023694
0.023696
0.023757
0.023966
0.024192
0.024191
0.024129
0.024825
0.024606
0.024063
0.024795
0.024600
0.024563
0.024798
0.024936
0.024783
0.023940
0.023595
0.023521
0.024136
0.023881
0.024536
0.024472
0.023796
0.024021
0.024247
0.024278
0.023868
0.023833
0.023972
0.023927
0.024016
0.024039
0.023770
0.023739
0.023918
0.024294
0.023680
0.023765
0.024025
0.024786
0.024617
0.025405
0.025569
0.025619
0.026347
0.026299
0.025318
0.024842
0.025447
0.025387
0.025165
0.025309
0.024770
0.024371
0.024033
0.023743
0.023607
0.023967
0.023929
0.023948
0.023705
0.023852
0.023915
0.024056
0.024081
0.024094
0.024218
0.024497
0.024450
0.024031
0.023125
0.023119
0.023596
0.023986
0.024992
0.025468
0.024318
0.026227
0.024455
0.023664
0.023585
0.023963
0.023725
0.023943
0.024036
0.024551
0.023962
0.023344
0.023162
0.023695
0.023548
0.023918
0.023399
0.023219
0.023269
0.023654
0.023937
0.023589
0.023869
0.023656
0.023370
0.023494
0.022993
0.022761
0.022912
0.023365
0.022802
0.023115
0.023420
0.023177
0.023120
0.022453
0.022802
0.022555
0.022356
0.022393
0.022938
0.023099
0.022717
0.022231
0.022336
0.022849
0.022850
0.023212
0.023142
0.023073
0.023222
0.023022
0.023007
0.023185
0.023077
0.022937
0.023026
0.023046
0.023290
0.022947
0.022929
0.022495
0.022901
0.023092
0.023034
0.023157
0.023491
0.023668
0.023507
0.023981
0.023792
0.023809
0.023115
0.022568
0.022512
0.022510
0.022404
0.022483
0.022869
0.023350
0.022503
0.022903
0.022708
0.022530
0.022522
0.022222
0.022519
0.022532
0.022683
0.023218
0.023465
0.024151
0.024264
0.023842
0.023773
0.023595
0.023870
0.023519
0.023419
0.023443
0.023022
0.023029
0.023216
0.024041
0.023819
0.023361
0.023858
0.024091
0.023884
0.023710
0.023508
0.023710
0.023776
0.023850
0.023374
0.024221
0.023404
0.023505
0.023434
0.022734
0.023577
0.025093
0.025441
0.024853
0.024683
0.024900
0.024579
0.024337
0.024463
0.024403
0.024570
0.024677
0.024596
0.023386
0.024113
0.025172
0.025210
0.023572
0.023551
0.023455
0.023709
0.023711
0.023500
0.023312
0.023540
0.023467
0.023437
0.022865
0.022717
0.023139
0.023544
0.023567
0.023311
0.023695
0.023268
0.023403
0.023554
0.023133
0.022841
0.023228
0.023027
0.022740
