# Supplementary material
Source: ML conference proceedings conference paper supplement (https://proceedings.neurips.cc/paper_files/paper/2022/hash/1c8c87c36dc1e49e63555f95fa56b153-Abstract.html)
Supplement: Supplementary file 1 [file 1c8c87c36dc1e49e63555f95fa56b153-Supplemental-Conference.zip › GOT-10k-Results/VLT_SCAR/GOT-10k_Test_000093/GOT-10k_Test_000093_001.txt]

849.5	766.5	61.0	236.0
890.042191862363	726.6056323077183	54.89843173230024	234.33634254771215
889.4432623814647	686.655596878317	56.09629069409668	227.6323975706864
891.8335614669132	640.3130896604264	85.38874068716797	205.32087445307525
928.2986229359443	618.0068103216296	111.01087231915655	178.25906617063202
974.0178054536888	590.7477554172413	137.21087785198853	160.3843325527497
1041.5751748761427	571.7340681525948	151.95166682347428	170.31379561646892
1089.0326154592292	527.1876976129865	143.27755959731195	173.16576275567445
1060.4053908766698	507.30798380556695	160.70961427551816	163.14719726187252
1104.3149486572997	568.2992968122346	149.3915659938924	158.46620774397633
1134.8983771096346	568.9726549811577	151.24386440309945	157.1194914061302
1155.4778359552122	546.3874123657477	144.07621485879778	163.44281304054573
1186.1547929633002	492.9216617866088	126.28606157065146	159.04470344941512
1167.6817358845358	485.12601756834994	118.37229348392886	165.6640154370826
995.2176723304451	411.96664526888196	106.70156021652336	173.80070164047882
992.4330679597936	414.4947352924811	77.18558085309043	177.51581861946457
857.8533739679145	469.00654041825277	86.8014114719149	158.93920563145852
856.136744863553	483.48534815444464	82.57863265727282	145.29366420580521
882.2459828288918	468.95441405843036	105.0025667654372	131.7027266613528
819.5413986033103	508.3553349244986	115.0387549490011	119.8916476652416
858.4222155146094	530.9557386829774	89.07003771534528	130.18325077929387
944.3416546663873	577.1140349885507	113.17426509860738	116.93142011195104
1005.0602327296857	610.0432657847813	125.80996912617256	105.42682074415005
932.1818067961568	587.0461591376746	129.68538111533144	104.12722074573058
940.9072576470764	574.6877957252526	119.58764851352473	117.8141939205259
922.5071218327471	574.3506087010037	126.4792352405924	118.48856796902383
836.4282374431361	576.8799349509243	144.34710175786347	121.14441058228013
815.7577477584688	557.2461082067192	152.2722807287205	131.1732387220223
854.0654254364694	534.6179473920532	151.4874013369779	131.82339801943743
831.2997759381271	517.844047313588	161.3475011716592	134.1588989096152
833.5884708360456	530.3270902789906	156.77011137582224	141.73383339919408
864.7132110869019	548.8152420815023	136.81485579338852	137.65303806472065
822.8257139177049	592.2339123793289	125.49872216707544	137.26217743698297
783.7200388980932	654.7370798548344	112.69760975368388	144.6376060534116
757.2599030975682	682.7616200938575	129.2154756633824	133.0803547536843
714.1352037623758	654.3886936711222	161.76797270780926	119.60718239597936
683.7173305652084	602.7585411578519	173.99855074345896	125.65715070514942
632.8970264866332	589.9779893365871	167.45610995172046	141.81103269994944
644.03955110522	593.7417518302366	145.17106071454683	158.61431168095714
658.1481768400646	602.9725643460429	116.95380924485775	183.1983403586313
705.8880803161434	614.0494599653705	87.2451213914052	208.02391990476522
751.3808949132053	696.8481615531344	69.0853326772995	219.93950289928173
763.4802260536042	748.2599122613224	53.67436042149846	240.14366183286032
796.8041721834119	728.7810245480205	52.84527918371836	230.83430917678487
810.7394868190048	739.2113861466358	50.42586143131024	222.69919173894317
825.2733861243453	723.7975848838051	49.92983015647961	216.79166483279715
872.4602000781546	731.305068463741	47.31606219825163	237.68272982703485
887.2138751718796	601.4322418418511	81.26565845637006	201.29596632482753
1043.773330084753	685.4768785731903	102.9628355257765	185.3958232690369
992.3320984942893	675.7295965988303	115.95622094865807	168.93475611453857
884.3738506520356	612.3353260101583	117.45496828550766	175.1133138463252
813.0717432656361	623.9925551789637	117.92568231295115	174.7236136934491
741.2396313570058	674.4906571519407	119.39602792232924	170.052294985093
723.3283976432118	764.3419303596511	118.89244481971112	167.43924490442726
576.8814843488375	653.494854082603	142.21055982473166	142.02232850677305
710.0994399522406	611.1022353152607	148.81725078686998	141.7615096281798
631.1703616230265	534.3985986948607	169.4042213188597	125.86765331303945
765.7420316645961	494.9452816947762	146.03763217542493	167.67590981287555
772.6930489091144	522.6772466454931	132.13559768638837	201.0857539100617
758.3025381433076	551.8673883618713	108.72242112508609	226.2161874259704
785.9867507323137	555.6076631729245	94.89684698886737	249.8927760852092
828.5150369380067	541.5933615117438	83.91178002159441	272.63055759013406
833.6089558094006	580.6001703624024	84.5532187481877	275.8365134091745
882.1368639933514	577.261423065228	107.8797290505735	260.6263122452893
887.3770665236525	372.7150640906791	91.72208059928312	283.6664796275823
935.6602549602021	224.41004335530855	126.60453806510489	254.51201860621512
1063.7594973554205	398.3200870023582	148.49233882167235	214.3618642577377
1222.2897883218166	287.71384251780836	121.65503648321364	236.4015142895498
1045.0883895749055	224.88864068669392	164.37148472375551	189.51126032942702
873.4101065288762	321.65990867085446	206.9782960266224	146.3436017557019
779.4395813284575	391.8558757138084	167.63162980118835	188.89056153971956
739.0959437644926	360.4229406370109	152.9144495495119	218.08427097110058
745.1604803251244	337.9338344271489	134.9654554880644	268.8824043310085
724.9867203247093	432.1292516293918	143.95405590320166	268.6450874406809
774.4214095051027	616.5288913478234	147.85295625131425	304.49590542010975
838.3429318431905	538.4909431556789	160.3301706811088	299.2035038325329
832.6529059396735	592.5112611081436	135.94192657832153	327.0823923849242
772.6904759924755	329.5104755355625	148.8461764640395	303.71149881887334
747.719479335923	122.4830523520931	191.76637289482892	268.37134471761664
621.1564438887306	64.88914822156059	170.49009259176128	268.0213208955438
746.1274664372409	132.3314985948567	201.9251943660584	222.35376427888156
672.4643881583628	184.7182553608643	188.94042589081096	211.09495701611843
700.3026693892716	257.8305187853049	196.23740434189875	209.7095742669198
889.7442453209619	171.42885191617398	175.30544741632994	222.71326740794413
970.2202158374319	116.64770102851949	202.0600799981699	175.8534245042701
944.634116763733	146.67722374099174	211.5975710499559	163.37690147431067
916.0708681379629	197.61815694961092	221.5809452422642	149.88839079313198
841.1948931953373	288.25366331823943	202.4772061850041	154.94089688899084
878.2110029499142	266.8123927842249	184.60670970829784	158.5102318343064
875.4747652045282	343.44253057057546	157.68213805037726	178.03420772129923
805.5513315113313	436.84490211006596	128.42685218286314	192.03827163133377
669.412634000231	541.1519383561082	129.52825309325235	169.2299728825275
659.4818940358462	516.3299631954785	121.22299233430769	181.3182689535014
556.3922478773035	640.0119869926084	123.54474567585584	185.22049032908964
500.20949936213134	654.505579113256	119.79506299591398	194.93836599122318
511.640547353847	620.0820434705578	121.53791215012204	185.04961283617402
551.0310992333887	555.3921375191267	129.1960624998954	175.16618200810052
539.4038600552273	635.7440207638693	114.21518943384427	205.63917263048523
564.9256673527699	654.808080958538	88.0984288035377	227.3355017566168
644.3130808715459	672.6264553717676	69.8276269598268	235.30345040410825
693.1649695136227	685.366547036054	60.00244839581241	237.57440351347395
