# Supplementary material
Source: ML conference proceedings conference paper supplement (https://proceedings.neurips.cc/paper_files/paper/2022/hash/1c8c87c36dc1e49e63555f95fa56b153-Abstract.html)
Supplement: Supplementary file 1 [file 1c8c87c36dc1e49e63555f95fa56b153-Supplemental-Conference.zip › GOT-10k-Results/VLT_SCAR/GOT-10k_Test_000094/GOT-10k_Test_000094_001.txt]

964.5	624.5	198.0	104.0
962.4845575534241	623.5644040468045	201.03088489315178	90.77731957567683
967.1862748317844	623.8988367033676	196.140108212158	90.10845426255067
973.5070366939672	618.220387031747	201.21803121792948	88.17576855818902
974.6198924241271	616.8834699927061	194.52270400742285	86.3799868860841
975.4578329574074	615.3951516946453	192.84682294086224	85.01568752883853
969.7192768573788	613.6702685377752	187.15344554905838	84.17283144461335
972.6977569643774	611.5031198654449	185.39169403339184	96.89754618593464
976.6087211073652	620.5542325459685	177.56976574741623	105.13862309775396
980.0097656633543	623.4744672159337	175.18309625763558	99.2981537578234
962.56952585555	624.8371205827682	192.9394093825618	83.7297221561426
1018.5330680737886	638.8555923894019	183.52334067180533	89.86311711811547
1082.4871722072821	656.1903267955129	212.5567103758076	84.88529819229697
1131.2753964550552	673.3489580245156	220.20478712624524	82.59289124393868
1176.650025803052	674.9655681225966	236.26120538716282	79.35967104777683
1201.0033284551898	679.9386075745479	230.88436707600997	79.04242925345692
1228.9819295481711	680.159010585487	231.7115401091412	78.60162323157876
1236.1253545019367	675.1613040994	222.16046649278218	79.12548362140755
1259.6889059574803	675.815735544053	230.34196576689544	77.81662073210138
1256.6139298307662	657.694777136191	241.19385193960932	76.44306619354026
1253.2734663469216	637.7306249252306	238.21274842356888	77.72324868054203
1244.2210607427671	621.768334784624	246.6931371054	75.96235011908314
1193.5642421277335	620.4216808695289	240.20399596461934	78.65565794927338
1240.5978464961217	617.7217827630301	228.71638712860886	88.91307768584542
1244.5104165415958	629.139193137396	220.89124703766097	100.23409831276047
1234.051425771156	627.1356453170232	231.87513112028745	104.24119395350607
1276.6388156804164	639.8038085731058	224.6536721665544	104.88930772960353
1296.4804784135495	638.1563593870958	225.7963789049283	108.1842061016236
1315.852528466704	654.014643203665	228.47119443895986	112.70918965378351
1334.3968579064365	655.4316368947962	223.15275334891282	109.87520227152112
1338.4838870855363	661.4372171650397	220.1468253262443	97.86404173103415
1329.1893903609161	664.6015098330734	233.82120551835106	91.53545639496667
1309.4010594617628	668.0552150596214	233.39997064422997	89.62778302592415
1317.4289354380235	667.062487127515	232.2226824261851	91.61323889013684
1357.2088375379137	666.7493246188752	232.31320711446278	92.23956390741651
1461.2667156014338	665.5772302007992	218.83256615960994	94.58375274356848
1512.6135425651496	655.5229202885074	227.40732343219923	85.66583051597286
1551.0730482304318	651.8283687620391	222.52282899203118	88.25263244288311
1566.8354143468428	644.5753688386227	219.6693487551788	93.20154829105913
1553.3679035681657	644.4236416850407	222.4772666502607	93.50500259822317
1547.4734472040589	646.6853186387735	219.65206555068931	98.72439124261444
1571.8787466279537	645.6273982186038	220.06702534579995	100.84023208295383
1590.7622825320027	645.3017622919119	217.05981484768813	106.45719840919318
1571.9872231789705	643.1786133514529	214.45176933769224	110.70349629011116
1546.9175926475282	618.6383202410677	183.71148738248723	124.39928244046729
1468.2541797675926	614.5476620394961	167.17235727632016	132.58059884361052
1386.1036400151706	600.1771292105408	152.3925721370781	128.33308417234724
1273.5427605061388	587.0675815220602	143.4231076196637	128.05128631887686
1161.2877548058887	569.9078894988246	137.16554649020992	132.4563554077615
1058.0545182570713	564.9855801961171	131.33940508767756	133.80926943316985
996.2965478625306	559.5761689386127	121.23856545381432	132.10151878352755
961.5455659581634	557.363915439451	122.93278893948721	132.53733517461197
932.5456866556814	558.2740078959831	116.57349643989429	130.71715026154794
916.9470012098393	549.5581783265642	116.62888198384947	128.68506855805498
903.3600575458372	549.5801912879201	116.76845235310142	128.64104263534315
903.5488876074717	547.1533364801936	116.3907922298325	129.63116662977697
897.0092597098153	533.124314061048	121.72413080753152	126.70554259761376
910.4792357824914	532.9728933290638	122.16875050523362	127.00838406158212
922.7069251259132	520.2053199161663	125.18042208811076	125.0764806176563
927.5358842096284	513.5937122044832	127.34566442348651	126.47653553821644
940.8195798688799	514.1474298991791	124.76143795126049	125.36910014882449
963.5947785069351	512.4698955369196	114.66258685038267	128.7241688733437
976.4263607398935	522.9521776524721	119.64952432787885	134.57844384272528
970.0841028199618	536.1620244055769	120.32844828685305	140.1736620188873
1018.7244336496557	583.5409679070862	121.43382660633065	168.39832498945063
1041.1593096520282	595.5301380443279	131.1554416856747	180.81422943769297
1070.6206042286615	593.2311979491293	150.59002457145252	190.30943288053058
1180.3119613750887	589.4385782297649	161.6605518223091	203.25405002957814
1210.7388056995137	566.3459864650831	181.12971553670775	215.015153974692
1236.0053994986147	561.6297613123581	174.22608297444273	268.07715931607885
1214.8545502469249	513.2077142114081	174.97121940847052	309.5125040921765
1173.6754363794278	479.62306989681986	189.32761221931105	331.3472361052504
1142.7521481610083	452.45898162177747	194.3132493110089	345.06045598023445
1118.997457425599	435.3738366289152	191.35825784778498	345.5878306765969
1116.2970886359108	422.35163735642266	188.3908107880588	346.52767530427536
1087.6896818859086	385.6237549899278	187.28597830858166	345.0010380636462
1097.3029209049037	339.9358554438454	176.34947342958134	370.05705188389544
1109.869958404759	318.7503317140512	168.15253433519086	395.49096343816336
1115.658820031922	314.60683694958345	156.57481108086483	403.7779529670988
1108.539892404703	336.71652827288057	153.5984651769758	393.98697263715815
1109.0662926367615	341.90632175807525	152.54566471285915	383.6073856667688
