# Supplementary material
Source: ML conference proceedings conference paper supplement (https://proceedings.neurips.cc/paper_files/paper/2022/hash/1c8c87c36dc1e49e63555f95fa56b153-Abstract.html)
Supplement: Supplementary file 1 [file 1c8c87c36dc1e49e63555f95fa56b153-Supplemental-Conference.zip › GOT-10k-Results/VLT_SCAR/GOT-10k_Test_000095/GOT-10k_Test_000095_001.txt]

1082.5	251.5	99.0	51.0
1096.8249694385024	267.5177002493921	88.00424092155124	52.94118662350793
1093.8141309509308	276.8479550202759	78.60928921372587	54.10205681698567
1089.3356751838137	282.6809855195369	75.08011291851913	54.92208364790446
1081.9210835613526	282.2719459989502	73.58036427983326	55.74016268907795
1063.9415037408517	295.4915085108878	72.96904561222928	55.713049776973435
1040.7596683304678	294.09384311673153	72.82833892151876	58.508380565286
1017.8138598345919	301.3961185209587	73.28513780108898	60.425581797625014
1008.0426510950454	303.8825547643281	71.79510882022672	59.65919860287713
996.7730912189108	305.60566973500204	71.58688965058305	56.21296866152937
987.0925029537624	305.28657586599945	72.86749569368814	54.84220412317984
970.4051326213015	303.10089848527093	74.14364471488328	57.207396906903966
962.2905319024891	301.42426453650774	73.85910883861621	58.496447640193836
939.3247031257146	301.4838411323085	76.09341302904315	60.45812079921728
918.6283332697562	304.78776928750096	70.25455437459009	60.2909369933372
895.955373190805	310.55274209561185	74.51373432853052	63.14135044850218
865.0605567886547	318.06091078309726	79.98876197914404	61.12069118592066
858.2520588150534	325.90078763671784	73.65073989746602	60.9615070566979
849.7970565347965	336.7627480807373	73.62056872300431	62.53032780425036
847.9038781641193	358.15830582611426	68.8376070702829	64.72813388239385
846.2703125089954	378.4257905062461	70.00158979341612	64.15298767730789
845.3475946000323	392.7811955164214	71.84702561134246	67.12470562495184
843.469563946998	407.6348315341763	73.41487161855781	65.86423247453197
833.2742650268867	420.46552037960646	76.2649431581393	59.93594687189301
846.4578550993124	427.35791236161106	77.73126690301035	61.13843423311899
881.1412105895439	425.5587608256146	80.40415641125212	64.73673730511192
890.2709172776792	424.58708544962093	80.40355684104065	66.68008805709927
902.5878634729694	429.5320208872229	69.65219999459859	63.73148495396431
893.942212296778	432.81066191181765	70.14339785935482	59.27421596572822
885.3750614105819	432.3934611753465	68.95122541277178	58.07234252545105
860.7352337232179	439.62655523136243	70.26601157235095	57.59590793450424
814.4208950616838	445.8962098124154	70.38406375220325	59.13430259853972
815.1185782781874	452.3369975266111	68.98869731919606	60.51687152396595
805.2909579859347	450.1726199836499	72.33700556308347	62.80726006731115
797.2425620862385	446.13075206208015	71.4183340126588	64.51019715426922
811.7200237107121	439.04764056323586	70.28231314600096	70.11675788048427
795.4171450015456	446.0407181193743	71.93395004877848	71.60766302598508
780.4702286414077	436.12994693902795	67.92033701386812	68.824241549887
789.378214277559	418.1976898678276	65.17848892017767	72.38706316669065
814.1085110909289	421.781909275904	63.36204004861575	65.21862435053782
819.3897924410581	423.76892645504483	64.94851483858989	61.24458999225611
827.9902156273847	432.99101723171003	59.670142300390246	58.69704021819703
819.619894615327	446.0585032222295	61.49850936076285	60.522583794176185
813.6456486403265	459.06499860946593	58.074388086374725	61.41166616238448
814.7315934089352	457.2140395799723	55.902498549157386	53.82466431950145
780.6649457203582	504.2796255311724	54.91941948314383	63.368054081852264
747.7105601751106	517.2274874282804	76.14963203608515	52.36518313348769
666.917109394844	489.8313956465492	96.67451364415767	46.70221528875265
631.3903540838191	456.00252382453425	98.80414502947771	43.212728752932385
649.0070846989254	405.65141755524985	96.4691583094735	43.02628612686271
680.1408565926573	382.0274280108145	103.19672671671009	44.99622283796109
719.4900340658563	367.22130203008237	90.85936540782008	60.87861404683742
735.7210077958275	362.35483292882833	84.55415431448665	53.96635637968542
724.4709402334177	364.9227290752716	94.0457574227693	53.166741425644446
730.2288679374909	374.3859036273433	100.89672363485893	52.60721394173723
722.472008033837	389.3889905231363	104.47397324025452	51.248568634740664
743.6025575701545	408.7438452609689	103.28906646356553	46.36631163808991
717.4386678251727	436.12451656870064	88.51766461938433	61.01791523036261
697.4107456761606	459.3324469458358	72.2955559509817	84.94949568412609
702.2757679348404	488.8155572202223	60.091216741827154	90.31493712202436
720.6436698728726	503.2817976880703	63.417868817501535	96.73168202609796
733.9107529990956	510.2436827825179	82.0342125837264	82.80791183720277
724.7684142708308	510.4993713170055	79.5514354899383	69.31687567427895
710.3983228828878	509.56600687398316	68.46066294961771	85.24158878957297
697.0297570939854	509.8800347381507	61.3612128070266	99.11492522712177
686.472554904266	522.1746531177093	62.39851160908608	94.60279404538399
679.5443500894394	517.823102643086	59.038955828702356	91.00877684460436
670.960722772505	507.397222255141	59.75964438045507	88.36544321747155
669.9317167233567	490.1748558553387	57.174099650176984	87.98349980276456
659.2295457110401	482.93487563859435	60.394141705027316	88.8252352589164
653.0072175158566	480.55838552940276	56.46423231996166	86.56054443068554
643.8271730868036	481.0661090347565	59.145320123372585	83.30524012645029
635.0567792944094	469.543857858193	58.804225588603984	88.46786036002014
624.7570590334466	470.68181985092457	60.94403473327671	86.19193637455706
621.9224270614835	469.0663101320148	61.996183186319186	87.11439806693468
623.0525178741669	468.4496214510602	59.73600156095253	88.34777542884392
623.8189447513356	467.9510456931617	58.203147806615064	87.0238067121595
622.863007121671	468.0318562569573	62.39077494556798	84.58643370494447
601.872507811213	494.16640512290456	67.44386753880023	94.63317739476581
543.55062974753	558.0519295046115	69.63462779736619	106.74912358210756
514.3790231808664	631.3987944497865	67.20766171758055	109.21856085121655
537.620493969984	678.1426682716956	70.37957582467847	123.3163338589535
545.2628198017136	660.4916181332619	73.22521837543451	125.37956140975976
557.0427929715545	674.2179800538095	74.46972514219901	138.2340738666399
562.0668632413674	660.5643734457719	87.60435168411202	145.67034386996727
554.4022324139993	636.6454051096702	102.93361333884828	138.83246693439227
552.7590526378918	638.6673557621974	106.21997289106315	127.19490105084768
552.2593282671969	637.4200821064547	107.21942163245302	122.345223133081
551.1551009389422	631.5045438147243	109.42787628896255	119.723384263571
550.7833943309547	631.3561240582887	110.1712895049375	116.41245318496058
553.0693512996559	628.095342359497	109.16728506137062	115.79819759487329
554.9180716737388	616.1012699410974	109.01222305901189	114.98969121102238
558.0671046167529	610.0057745326246	106.24143236773767	113.07158124895258
540.2653498110715	639.0741322107185	100.40498807112903	137.81477370870738
444.8547740965584	682.6231763834431	145.36965432966292	118.03506313425463
387.15630374020714	693.2883790330826	161.3461601644493	104.98969407480189
253.62098072789522	726.2967177275801	199.02693234721625	93.19244141206391
247.12492268597953	708.3595061205181	212.01904843104762	97.38628523294115
292.0009279898767	709.9185506405545	189.30171626795885	122.99734409774214
331.234171971832	723.8801224662261	145.06737080575095	143.9772611631173
