# Supplementary material
Source: ML conference proceedings conference paper supplement (https://proceedings.neurips.cc/paper_files/paper/2022/hash/1c8c87c36dc1e49e63555f95fa56b153-Abstract.html)
Supplement: Supplementary file 1 [file 1c8c87c36dc1e49e63555f95fa56b153-Supplemental-Conference.zip › GOT-10k-Results/VLT_SCAR/GOT-10k_Test_000096/GOT-10k_Test_000096_001.txt]

633.5	468.5	208.0	157.0
616.7181776489672	467.8517372064075	188.95776418120036	157.296525587185
661.1919792110077	481.8030094256466	143.58713307626505	178.41807467024557
677.9599161040028	508.3799217856774	160.686520686269	165.77245906697937
706.2234887430878	548.8570589350469	206.97798180421336	146.5093486059091
763.7901726755657	561.7555021882727	236.04919724883266	153.9904428632055
825.022832778481	552.7112287880531	241.8577103006379	165.97071188947172
863.3603608276253	537.2431386489666	241.918306645905	177.72297905675546
937.3217502165803	477.92342563411205	186.24382883901393	197.5249397603729
955.1585044776856	427.8331351693496	150.57032031680345	201.01832333786462
945.0411001243302	370.17336809776145	126.62463713101465	200.36406626322957
891.9900395377092	344.76013048702157	115.045202391933	179.55829005981667
852.3369440822248	315.37958454390053	102.12075988357918	164.53487521060075
822.8942748108655	290.1061684523655	94.27898338979625	148.3545923571689
787.302196850025	264.9919722262217	104.70789026230199	149.21934495700174
744.9365658643873	244.58472843191015	137.6541044113394	130.2818542891964
674.6820537953871	246.22747112366562	172.6865137482948	110.12011053751826
625.6947844089507	251.00212026510127	168.85578201158353	100.570812254647
612.8600194013995	256.83480387064134	165.06418343270022	97.32291035613412
641.7395373964213	290.55432161284887	144.18272381032574	124.12657003353964
662.4042418689093	305.1258838013474	136.63244284625642	132.9849646350626
663.2935613149559	325.171518170802	143.34549653262872	126.86046621001562
668.4962187250792	345.7781549426919	154.2063404774503	119.6730466903449
566.3730444921523	390.36056647446924	147.53310730973527	133.81577381466087
525.8959144622486	413.338829764101	126.61175809019318	154.2998619827991
527.7695731837568	438.26685103977525	122.86444064717679	157.46497420136546
564.3674395155449	491.9223154716461	146.6055828784448	155.90336340472678
592.7269910222235	549.2864119968604	170.86356308554744	136.44232708425085
664.8641226886555	596.1603305915692	176.37718563509412	158.65930477153813
706.8142197342228	655.8556869746633	197.96340008716473	160.57796183003592
776.063212281714	703.5992751975514	222.98602686610195	149.67041221559745
832.9001694486367	701.9284344941598	243.63539481431724	158.85223633029648
927.0580429405572	644.2764006575703	200.29171988884275	179.6093004871493
968.6036594712023	597.6091832962434	153.08334474501692	201.17801937487508
952.5108015740866	516.0680300089433	146.3067019880091	202.8448405229126
929.8015639074791	465.1029499979635	147.88199525355003	178.7258521003095
893.9759041062083	391.32766025830097	157.88099155873698	177.28331694436068
832.8265331027985	359.92215403649834	158.83250091710875	150.4028965608523
783.8972176347587	331.37126572393527	188.5195819474126	139.33312328020293
720.6852071640802	314.96283334167975	196.52837545355516	125.81359470049962
700.5978522197395	302.38202383866235	166.06438939059785	135.838350288326
629.2621021736419	310.59358826011714	175.78032379935826	128.9120475656619
644.13933468594	329.6196735585619	174.73041298874216	124.34852355174897
566.743689522997	362.65074089717075	160.56766463898754	138.07024047136144
525.0524787925319	379.38975594369697	140.55840839241796	151.58842751808155
518.4194175747895	398.0099942741226	130.82494213473703	160.34712824356166
522.9140823588109	419.48614180034764	121.8356125666942	158.61025094320314
524.6749305797284	452.57363089419516	118.31391612485902	158.53978514009415
529.4175072680241	460.56570340099864	121.87390369733939	159.94916139191594
529.6281325266374	480.27862576983875	125.88067393134814	151.51946191288332
531.3933402690808	482.98952518909846	126.71409732011354	146.09766307436396
530.1826829340255	485.0860077263428	129.13541199022416	141.90469799987517
532.8966639089856	483.7674936890512	127.97461383509147	140.27456227967087
531.215675076813	484.3708216892387	139.78316373946714	139.0679062792958
552.1120992083617	473.9431343185424	181.4260000916212	129.1838182677012
597.6043225646454	476.3809999848225	202.54736663996425	129.18225272909362
660.9639734102083	466.94734450382276	216.01342911174402	148.04956369109308
739.9566344365138	415.52301415371744	189.31774760058173	153.85805529545024
822.5754787712362	386.7896051994752	164.40533418865735	162.75073946094682
868.2698769950791	337.6095240025925	150.29725292963394	147.76585291134097
921.609980383353	312.80901817083713	123.41274873944275	150.42821599464193
946.099350395661	286.6767982489687	104.5844543894538	146.6989710140715
951.9993038364571	259.6835022274655	92.78454750786156	145.47935552248282
952.0077100614762	249.96082439540908	81.5802076135966	146.27883211288477
940.6553920799313	235.53571057677857	79.42095127608027	139.60921360642257
928.125256323965	220.2330390193927	87.39831807838979	129.21558541809912
915.5796019742179	216.45737715516623	88.72242864410471	133.37159512744077
911.7967748984494	204.50381221005472	85.84859505984845	125.96026181028421
904.1245817485362	192.7110776627734	91.23122425976216	129.62221670502197
898.1147617128631	193.42005314328927	99.78601912715334	131.6691109479454
894.8201111236303	194.66193399895633	102.73901340922419	132.82165613300606
891.3991584916677	196.2977171960684	105.87887205585197	133.2521363560793
853.2978303673184	191.46665752389896	125.68648637996026	135.3949167771394
822.5079945919741	170.2295793564233	142.04727604422345	116.2069614487834
820.6076766093342	186.70486657768333	141.78600894119884	119.81351462100244
782.7195785202249	214.84952950755337	114.66113025639599	125.26483367907531
793.7318429295756	239.67595322028802	92.63660143769471	139.82844938184806
802.837520548896	297.5827831079705	103.56092123227346	133.2735709810567
845.8985832706129	332.9199446211661	103.05242881971876	148.21288098554467
870.3146924332558	377.9206507067813	117.2749896930713	148.85271391235682
919.5219822805739	438.12091812585186	115.08332909708705	158.1439395984858
953.7632327326065	487.8196283239405	110.9420062668812	157.40299224889333
977.8494419449127	534.9716534306991	117.50011631595427	172.55999898274675
992.5901991551206	583.9176703863629	124.39664416391376	183.80209187654555
1003.588909663872	624.5830323975974	116.89201496773998	208.75184121048994
1016.9653245276461	655.682707673734	125.67807828912777	222.70726147736542
1018.7973827993561	689.2398941352819	170.91030120810203	193.62337480279854
1079.0249846165923	732.1435874241081	205.37843352755442	193.88450819954858
1125.4934668831252	724.9039235277091	213.0327329684427	202.07688199397438
1136.6525539297452	691.1502934313392	203.78773900493982	223.82801173263533
1153.276328064528	615.6306877746895	170.54019073537455	226.75756338477555
1107.393107141607	578.2945171803341	168.6919475784083	201.57424057049133
1045.9013961256235	515.5868355675377	186.82154705841236	193.00971942413105
964.9688923904883	436.2628533094355	181.2074585303301	166.23439908501683
901.0692703748338	395.9775214715567	194.13134839902713	159.2809833987841
820.7606995265597	341.4672118545319	182.4263289074084	140.4496765900003
753.5598676674974	317.26082321640797	195.05421585833557	122.9016581173496
698.5991593672629	298.26441745083366	195.52906939263437	121.0957194426183
677.4544930227455	274.80745165097954	173.44692193514322	133.3480848095817
