# Supplementary material
Source: ML conference proceedings conference paper supplement (https://proceedings.neurips.cc/paper_files/paper/2022/hash/1c8c87c36dc1e49e63555f95fa56b153-Abstract.html)
Supplement: Supplementary file 1 [file 1c8c87c36dc1e49e63555f95fa56b153-Supplemental-Conference.zip › GOT-10k-Results/VLT_SCAR/GOT-10k_Test_000097/GOT-10k_Test_000097_001.txt]

715.5	187.5	235.0	159.0
653.5602911125595	215.511973812762	215.8360426507984	176.08563939573654
604.5631955979584	271.0378902867486	209.04132337685752	151.3305561091754
582.4991640233054	275.9809923145366	207.91398113865608	141.4443520535994
551.7414918932843	268.5148087218526	187.27800821289705	145.42321028086064
541.4764112859361	271.2682812188116	171.20507198087518	150.37429312886215
550.4256589432895	285.29896578648084	163.42974683281165	162.80560466009655
543.0689569999789	280.14188539652287	157.592901759938	173.11976544001237
522.3477326254192	267.3821060516534	152.17560582674466	177.81277093761236
511.75453109517133	265.5172232629226	147.39828366871106	197.12077164619166
496.6210930174831	303.22814890227954	150.60839889681594	213.69190752020157
483.4581763024361	327.54165768585415	154.07235719163577	210.78864022360074
462.1630775277962	353.17852776139307	156.56332634379254	205.34258966923474
454.3079701847887	395.95877592271427	149.52814604218162	188.01827830947053
429.5847537494411	412.21220224239073	156.51821946240526	197.96778512058899
382.812094147169	510.67319934975603	155.32410324352838	168.23302988836625
400.52651643482403	555.302356305522	155.55587660827246	155.39032584837906
461.85402461733304	398.13085187559676	165.1142014850546	171.0291193100885
521.8299765922263	388.8358117009719	156.32350254076675	179.0324182302431
548.1369286264036	378.30589246951	145.93493975398687	189.53592137277326
595.269385367054	345.433010910275	141.29128537810251	192.01961924036098
621.7176177048536	387.105759024716	140.7325257455479	187.1806805760462
617.5983105596524	347.64318565367273	148.97114003595047	183.6895090630688
600.050151126934	312.7888985723017	157.90939477662718	180.1555036764822
607.2744110148309	278.8617904740933	154.10282343625343	184.15802926037802
606.6292565162435	287.88545429680437	155.39313243342835	182.0757510212204
569.627459740996	284.88460128560155	149.7419859032272	182.76714103824628
512.353030952833	302.391023785549	159.69277664162442	184.36361943162643
449.2356318159735	407.1727164364802	161.38884300650207	196.80406057595994
425.954656671532	394.9049590256568	162.87930484892655	193.1698951185703
400.46938398623274	423.56748182497915	152.22786134586988	219.87483434763732
384.20035728867475	449.88798567506433	167.25903635614108	208.08320954543814
355.18859830525	452.14111101880917	183.9674735925626	197.6748044678875
118.80315719469687	371.2413792273574	224.07988708388893	173.19076068102459
215.23244683266813	326.092998849061	224.76625289411265	163.59335623185416
325.263744663052	458.7921834543655	199.8045181660925	172.55557270792158
494.35685508343056	250.66369661317654	207.35899511581755	196.19175398415877
613.0970315845599	221.03031830497562	217.7049829933132	172.84973030730913
458.3208332828425	81.98381547945746	238.6624079200373	162.3477642816348
551.7203568050387	87.3784786448739	240.4573699055693	151.55843795080193
670.6613116585097	92.08233224838676	241.78835476006975	142.1507307437762
741.0556384840298	85.62743783564204	238.8885742360244	137.07501437878807
865.0357097853486	83.45568264080184	243.17331665083157	135.55236465178373
956.2560962995045	103.97250379273295	243.74649393259247	135.84445306309922
983.2697576037459	255.95545464895045	189.71917132410974	169.15461960714725
1101.5903774441865	288.96502386244657	150.80117694100332	182.22477929926495
1106.9538562645278	349.9229757961816	176.74486211377882	149.36615083590658
1069.0177830685213	428.19639783475526	155.12649354499894	172.40709747600852
1162.267705781256	450.90376042716423	128.46929044548102	199.17937205129755
988.6938601942074	330.4662931488585	162.70563845669577	163.0508224965054
811.0897249518955	219.23346750139953	194.7225048529612	139.27540400981667
847.787663920616	224.78308398844987	205.19316455282924	128.17617103571598
925.3584963235567	249.54009497042568	211.70929904290335	120.38029082555934
990.5396914399641	269.11141095581024	210.8488860145644	117.49821247204346
1071.6375624614461	297.43289993142344	207.3207424139551	132.5115693012354
1107.1590420264586	311.42861699363255	178.8311715228325	141.75434988585675
963.1346446552061	282.29804508906324	204.79254314524806	124.41335241035426
953.49979924626	303.50452265117383	198.33439891978418	118.01936634683184
982.8892469539439	346.41435832832326	184.0303349557754	116.20770995621119
989.3637204686486	358.09314662461645	175.77929011264587	111.64174210874472
1013.0123593278563	394.2658652409959	164.46644142883048	106.76710931586084
1020.5084612546249	395.72546029495373	153.72140125940797	103.84791920794507
1019.1536006389665	415.95970628028965	156.43112249072453	99.71382259829389
1024.2282463986191	427.3277465737765	150.29081152401437	97.02264477429551
1028.773350336493	433.3785671741453	145.07265267433033	96.53715065174808
1152.6030343490038	393.4247324206032	128.33715575438333	104.5177127654483
1154.929112399981	417.58764663331453	123.68499965242887	103.8005659292846
1009.2273642462087	474.63982717101675	150.24051449695835	100.64603492622442
984.8412088329059	504.40868804230894	147.90172205623475	100.08266310748141
893.8718014986944	464.5306953958449	127.71279454778598	117.64549696137192
901.3900376370281	489.56147923732794	116.53941915546949	125.53038254366749
900.6130552401753	506.19647258090197	114.28191851181231	130.3750502301443
871.9002877377609	456.3175155266008	113.94573450490222	133.8634326525151
868.4496549057495	466.59435184571504	113.04829228525293	136.70588366530262
886.8078415636675	571.8371228394312	111.69042482666359	138.37137682134863
860.0455818221236	512.7594515684729	118.02646567133596	134.62314954735922
872.3028693660772	538.1710684635397	121.34800215747748	139.47213890532345
866.545131035218	564.4837545654665	120.54870724657647	144.3157007070272
849.1158835608184	566.096233463403	122.07206025460978	145.25763565375
816.3605804396208	578.975853902109	120.28736791785282	140.5281755823231
782.0761189519286	564.8707238492566	114.98000520918427	148.2172452202354
749.2398606912926	590.8000984744839	122.74057023602661	125.31447171699583
736.0969115959588	600.8480814759505	121.68218615402445	113.03115779196798
