# Supplementary material
Source: ML conference proceedings conference paper supplement (https://proceedings.neurips.cc/paper_files/paper/2022/hash/1c8c87c36dc1e49e63555f95fa56b153-Abstract.html)
Supplement: Supplementary file 1 [file 1c8c87c36dc1e49e63555f95fa56b153-Supplemental-Conference.zip › GOT-10k-Results/VLT_SCAR/GOT-10k_Test_000098/GOT-10k_Test_000098_001.txt]

482.5	254.5	800.0	331.0
480.2664019504987	267.8214372392318	803.4671960990026	320.7811019101197
476.8991877598454	280.81214706125934	810.2016244803092	312.0916215668728
489.05371147792454	287.9554339032188	820.3590245308523	315.03827162630444
496.5751727349967	283.95260330358997	822.7480401421528	323.04393282556214
494.49958938513	277.1931609832006	826.8992068418863	336.5628174663409
547.7372959052985	254.31532625688703	827.8887481762763	346.4968354607257
560.0515693203532	205.60933935216167	821.3618559760721	353.4005361206508
592.5462409288832	173.0620311739156	792.6315778362434	364.1065548612961
612.7782801574645	161.19732638142273	752.1674993790809	387.8359644462819
634.7604186819617	118.82086057388281	708.2032223300864	419.42252535729625
552.2319441035512	28.35464040854302	679.5314482293209	441.84964665904147
581.7781456385031	14.829551948737247	637.9991411723036	468.899823578653
599.5507385669056	2.164254012105289	619.8345082169897	459.46931364893476
512.0359729756346	82.03503797611327	659.2645084585504	435.3272766618998
406.54795786752163	116.70788998824281	715.9153494647283	434.57054561988446
305.4549385503086	131.90230398419806	792.2277905955616	440.14560262900045
320.09079025678716	212.20160444835295	858.998221021021	433.2144158421569
199.83970304386662	264.16248774643816	918.8547999663604	449.7230462329876
169.4802996702109	251.7320915163436	958.3401195763627	474.58383869317674
183.2291786131974	323.48985921284327	953.0842808111638	486.7617371455956
289.51990111362807	370.7585252844684	897.131102821759	459.35080515011236
378.3633622946645	434.0382768174783	845.9359629814144	480.3650483594425
384.30689791808805	399.7102431836737	813.3615649243612	507.64646200663947
486.35558151221704	385.02734397174856	753.9089386301947	495.6851916036065
530.0861060814759	416.7071712717188	705.5945388302539	530.1921603501083
628.6065485804264	414.5062871337704	644.4386223954693	534.5939286260051
654.6776947488629	374.9318229263591	610.8436158024587	483.9118568337923
698.6542360842932	391.8206514118039	591.735527250527	432.9229513331703
701.9017854737111	361.6950746228813	585.2404284716911	380.5593136119653
718.6211599678076	376.74120516365247	551.8016794834982	350.467052530423
724.4992632986001	345.40866432209407	525.9252310378367	328.4106835090812
747.5745212448775	329.03983594412153	466.4107974031713	307.69266929658295
760.670036616624	333.04306787831405	440.21976665967827	299.6862054281979
752.7795639222014	324.5011557189094	421.2025122235782	316.77002974700724
767.5525116156123	286.82787914036027	391.6566168367566	299.3766888826316
778.8064495012889	260.00597394387665	369.1487410654034	277.01359386287595
742.892272494799	235.25395792696082	359.7779682288122	275.7681716157258
746.4240143535105	243.57500686033254	342.72776775373393	259.1260737489824
763.7488475255611	246.73339132576183	308.07810140963284	243.35417915752438
777.2604870003084	232.75654267770068	281.05482246013827	227.96284915605554
759.8357055672724	229.79259236620612	275.87879516342537	225.8856317464877
745.1424149762965	243.56924904380958	281.58940430431676	245.68426247340108
753.8430368604252	239.17890182084236	264.1881605360594	229.5688330934385
758.0868381136152	259.4511608736577	255.70055802967966	251.1916834884235
761.13687595186	263.1037536393478	249.60048235318993	275.81640209013074
733.6333489872547	281.3899439733141	246.70559196125095	305.4176720749404
745.6540671172393	243.18480345534505	248.7118229822105	321.05006278871156
735.7001671184046	273.8876112436254	250.71056160018497	322.3261620410831
745.3507030145993	199.5967060875224	258.4291837056396	326.80293823145377
742.2247002158163	190.5418973340515	264.68118930320554	335.7120401548244
772.1479687339366	207.9095143283144	270.9038354672573	357.607534623692
807.2474792296988	176.5118949078659	269.8245210504022	361.1573106863011
810.4664955467115	176.4659571370126	273.2971520787814	361.2491862280077
838.6887909114039	190.15391000882616	286.6343672067147	363.7797687089455
822.4037830601821	229.37929011986748	298.75495441459395	356.9020082178368
823.6302913808463	221.40381039359295	306.6170881313441	362.53781731230765
853.18490621857	218.42311662027862	321.20854283746576	368.4992048589363
852.6049110429955	179.67126074103467	322.36853318861466	359.1616806221263
898.1047021341133	115.99505981706378	327.9285873749726	336.31020367447815
982.7857276911661	152.77894120255706	325.93045956601554	335.96415734949403
1053.0641893686459	156.6996216703488	320.8756283621277	359.3925099872348
1074.0652733486404	162.52338330001976	321.7078213326781	390.5793476584322
1069.055422686282	126.67133123758566	331.7275226573946	339.0394036696158
1076.7463174128666	151.88858219132504	348.03503854774647	299.16800354331065
1065.337860977444	162.48366568874155	360.6670433124046	277.9778365484776
1061.3335287563282	171.2978050904668	358.6394055357929	260.34955774502714
1108.0765312314252	169.2108412487141	342.8900855252441	254.80639981107691
1127.7364388093104	175.36437694136544	350.50504547967637	242.49932842577422
1124.7764454828807	175.3806132231064	337.8253367691889	242.46685586229233
1054.6847676354225	150.0613440503713	359.61040174535367	238.4600292606465
1084.6543899349322	161.6543371296304	365.26114206796626	234.01403879402324
1139.678803590571	197.4908722862203	358.399468247537	228.00552070229213
1128.4780954145613	202.02470593332504	353.2684723213599	228.1153241674816
965.7205786049238	421.28702788371345	341.9924292874828	226.50883376268555
771.1582627850664	436.1911755264012	392.67093561502077	196.70053847731006
873.822660774538	409.5495852236967	416.1489100385958	176.76555255391332
895.0173062224089	416.8906311714966	446.91964750195064	171.22846420320053
969.3058734330052	451.576392907553	488.1322798817242	168.2833591114259
718.0814270176202	474.44222196877905	439.16398689270034	182.70630307840574
727.4575367857645	477.2813362742772	410.8289896260806	186.61085219774066
