# Supplementary material
Source: ML conference proceedings conference paper supplement (https://proceedings.neurips.cc/paper_files/paper/2022/hash/1c8c87c36dc1e49e63555f95fa56b153-Abstract.html)
Supplement: Supplementary file 1 [file 1c8c87c36dc1e49e63555f95fa56b153-Supplemental-Conference.zip › GOT-10k-Results/VLT_SCAR/GOT-10k_Test_000099/GOT-10k_Test_000099_001.txt]

818.5	339.5	379.0	467.0
825.0319673623553	325.62605158466386	364.93606527528925	480.44309341102013
853.6212210040896	291.71833822267365	347.6034203581693	481.8487495244196
902.3668496319368	280.15837302655086	328.22855256165826	478.92988343027076
909.86478964393	283.9359852358838	313.2326725376719	471.37465901160493
919.3374164182303	254.13184135933108	294.2874189890714	469.51736695713635
928.1666350619262	250.01462970941168	276.62898170167955	465.80276583379896
892.5675905195017	264.6625505660465	266.6511195224785	448.1034885868222
866.1188950073264	254.94918744772076	252.55892278106575	422.8704896462982
867.0151750035699	261.46996097947317	250.76636278857887	420.3807510459845
869.2007028515177	296.7555199767249	246.39530709268314	423.2013114086219
867.5729440160558	290.75633269001344	249.65082476360703	435.1996859820448
869.1302058484384	302.5254139368059	246.5363010988417	454.4040426251902
867.263773917447	293.1249051295573	239.35275588567188	473.20506023968727
866.7675814611403	285.7907124675096	240.34514079828534	476.8041709583819
868.3439324793005	259.5871364481367	237.19243876196495	473.5155359915853
872.9583293930958	250.92422315767595	227.96364493437437	479.8048833009299
875.6257403078339	234.88669477400742	222.62882310489823	489.9436548921419
852.5708745302834	210.24158643704396	213.62633722610343	484.12165413217303
808.2366208383164	192.1468335586235	216.05677623552745	466.41236715494523
765.2035643268555	155.63571561140498	217.60119623386174	465.478121652868
756.9965570627938	145.8427254885754	223.43660482423078	474.48549596077305
751.0948387679185	149.3219741842297	224.42836836481257	489.1503446678021
749.2428457247053	174.5177965755134	228.13235445123905	505.0133940982182
745.9759570590866	158.56367080670407	234.66613178247655	536.9216456358369
740.9873227768165	146.07392356068493	244.64340034701644	561.9011401278751
747.0701397971052	139.58044270659428	257.38458084155604	574.8881018360564
739.9543202421814	139.55329315154444	271.61621995140365	574.9424009461561
741.9456995692592	144.59669968463174	280.74940487153765	564.8555878799815
737.4467178830821	155.44223704506555	302.8747361426655	556.2918810578875
772.4144617907671	171.81723283799568	326.6148864200019	550.3063574985148
763.087992767377	192.73053610290293	345.26782446678175	549.5707458528962
785.503592907836	199.42185151580532	370.4357449304563	564.1877633249285
777.2015922921662	202.76599961097514	387.0397461617962	572.1386676450927
759.6537204957976	207.33536719235673	407.10079677004876	578.0346254668141
732.7627916833508	215.93391579597255	429.97175631657467	576.2929772987662
721.9055898239434	228.46051491265627	435.8814098981838	567.0445292026045
702.2367641975452	236.57817253517283	443.6984486971278	550.8092139575714
689.5050488833892	243.1076778941126	453.5230666295108	537.7502032396918
685.6275233356232	246.1510197984636	476.87462611463945	531.6635194309898
681.6677852789758	244.5149235662987	500.67073255342785	519.059081569826
684.2887622979613	203.4185912698917	527.5449474802608	488.845154785826
666.9726063427119	203.81107222385248	562.1772593907597	456.0537079888386
648.4346097733866	209.64080995598331	583.2399067492408	428.3808867444075
624.9827457010132	189.79037975159656	614.2593323527083	404.5445369880639
598.9807730983981	195.33245107279475	650.3043258549171	393.4603943456675
578.8218551806962	201.04898244713272	690.622161690321	398.3396819631294
574.6663818224657	214.0224409858041	715.9269830400056	406.3805141522341
562.4301914279656	211.1105590929358	740.3993638290058	412.20427793797074
552.8392237060941	203.45733706980707	759.5812992727488	427.5107219842282
533.4768533286983	194.5409001049924	761.2848361978834	408.32239208420066
529.3940040254398	198.9609909388056	751.2424087652923	399.4822104165743
533.4172831788796	205.0506496985177	743.1958504584128	387.30289289715006
589.2965753412643	217.23674186815043	736.9244515770764	380.51190613179006
622.5036314470681	241.10531802113996	739.9991499736875	384.8913617819751
624.2733319299596	246.51149671402683	736.4597490079045	391.57175217831156
633.1261809255147	245.3590084207292	718.7540510167942	393.87672876490683
651.9857065002252	251.9503236921579	715.7030088924532	380.69409822204943
659.0263911259443	253.88419577264733	718.6850432597132	376.82635406107056
650.0046757643662	250.35838808850892	736.7284739828694	383.8779694293474
659.9745360840029	244.05092505185002	751.6432838611863	396.4928955026652
666.5597376453213	240.9932192402946	774.1995209341771	402.60830712577604
676.994490268754	244.87392330001774	789.9299676339763	413.1468749796619
691.9263727317144	259.56070044059646	778.7785655706778	383.77332069850445
698.9999154036316	271.69037630547194	764.6314802268435	359.5139689687535
699.5523500371238	276.98636301291145	746.1132972048506	348.92199555387447
704.5760672740271	277.85860164791256	719.1071845384814	347.1775182838723
721.4884619396069	267.0809259572836	701.8169294784539	352.1983353939979
729.5386183597993	264.3603178411869	685.7166166380689	357.6395516261914
728.2871847912699	264.187441816479	671.9930231901537	357.98530367560716
743.3020331877642	265.0913405038975	674.0244797846361	356.1775063007701
741.2619771039549	265.8285405473575	678.1045919522549	370.7325559656524
752.9366603746817	273.3918236320422	654.7552254108012	371.944828391952
746.2078134481045	278.2627073686856	652.1984985638185	394.2319023189398
750.658711594877	279.22903351619874	643.2967022702735	408.6528046303707
756.178352176965	272.7631875672985	632.2574211060976	421.58449652817126
761.9182388278426	273.9617518948137	620.7776478043422	419.18736787314083
768.0570641944205	273.2315717499138	608.4999970711865	420.64772816294055
782.7652833418508	282.86266395869256	595.2229703369508	401.3855437453831
803.3706979145455	282.7497043011498	585.2526047435124	401.6114630604686
806.0262728429752	282.1204142634538	579.941454886653	402.87004313586056
820.1246857498138	295.35985753691557	582.5734651085645	407.21999262452596
827.1457012178151	290.95546822622225	584.0574589078376	416.02877124591265
827.4745724436618	277.9983744001336	567.7059986393406	426.2492410812863
831.0012527098481	257.5799578609855	545.0394793214341	451.47291537404874
834.1526649214076	238.2379534094013	523.0608498397389	474.48111921864086
846.1842676664271	230.95726424505727	498.99764434969995	489.04249754732894
860.4439674176898	226.7865520982559	470.47824484717444	497.3839218409317
864.6286473828964	235.1447824903488	446.86843345154284	495.90791252196436
865.8920766441249	234.7692584980056	429.4997255246393	496.65896050665077
869.7020042334701	232.55531841077897	421.87987034594903	501.08684068110404
