# Supplementary material
Source: ML conference proceedings conference paper supplement (https://proceedings.neurips.cc/paper_files/paper/2022/hash/1c8c87c36dc1e49e63555f95fa56b153-Abstract.html)
Supplement: Supplementary file 1 [file 1c8c87c36dc1e49e63555f95fa56b153-Supplemental-Conference.zip › GOT-10k-Results/VLT_SCAR/GOT-10k_Test_000100/GOT-10k_Test_000100_001.txt]

871.5	214.5	210.0	146.0
826.5665352421743	288.16342955637793	215.11286316966869	126.09604261775088
787.2957998373066	323.07367149685064	213.74247427736827	104.22267455802695
766.1063601094856	347.9939948122923	216.6612861477746	93.84209551237919
735.0838337485957	369.5274649422049	211.60110046815245	89.12100576764087
709.4525299944069	364.81615754332245	211.86172837454828	93.90707696522567
662.168261097873	338.084713507458	188.30937598432354	104.84644457096934
624.5862250414684	319.7634560656739	190.3596643845445	104.9320675982434
608.0016013119373	318.2209694729302	177.5153470292929	108.01704078373072
588.8540797440436	327.06183925549857	139.93684083720288	117.11420098137431
614.0452955866641	329.89650195002656	117.86280868783419	115.4889326688715
619.172658570002	346.16855690668825	107.60808272115838	112.34308702910879
631.4599180151912	361.49175393435684	103.81514755667591	109.40547127496606
634.7450975335146	385.1893663232326	97.24478852002909	109.01547729000671
651.8211114871506	394.445983463814	82.57398427246403	113.23033727850213
680.0551713628773	394.20734899753336	96.80946932856544	113.70760621106339
675.2397861363859	425.7257483624611	106.44023978154829	110.29685806191293
772.6230186458306	375.0871419326052	109.63053281714568	109.18264434171786
824.9480287693968	353.82773897637577	129.03201260460952	96.5674502388006
894.5032971497687	401.643927283916	131.6630408002717	89.52355172147395
965.0616150504226	407.77178126243837	139.64519889773993	73.80042995282984
1046.3583230906581	399.56677432066385	133.14457826243788	80.24707391434687
1124.7991689076562	411.7251975748246	132.98843361706523	92.61067457357542
1218.2528858498047	391.2804502142011	147.77477282062384	80.42286058749227
1291.3191522274467	425.58663816208855	147.36922678900572	90.00545317758674
1376.8431587129487	372.88664776002395	154.43938576037408	76.6599860201343
1455.8115153560548	399.3545129283552	154.35088295676317	84.71106427902225
1500.898990941503	416.17014598676843	153.56650364024796	84.60126260758877
1528.734551113544	414.5608901495341	149.851543646785	87.81977428205741
1553.8532607085644	412.0244755502376	133.01175753238317	92.89260348065048
1586.98948956052	417.46201968644647	130.52222489971246	106.82198606927054
1610.0015380508064	436.3455959000789	144.22680824850016	98.91917380668585
1632.0127478113154	449.4063011741408	134.5161245291889	99.48466888211149
1643.0525952445635	449.27722195375253	138.1594253130195	96.06811365855557
1617.1615527695074	435.0538191660795	138.5096699492885	95.12529619741969
1561.0672262229155	438.3615317958289	140.79638693057422	88.50987093792087
1567.7240305104722	406.82658172239036	134.65793060506027	97.76612921279902
1548.5675313608226	408.3553314346003	154.7275476912673	91.0599535457606
1476.5038136788623	412.8133235051482	172.19876673795736	85.98203656579301
1451.5584228733264	378.0193697506862	161.95809891193866	95.4384946376264
1372.670837941872	379.6412677174702	158.95298783374594	92.19469870405834
1283.0912739520236	367.1575396294812	161.71236241393717	89.72219324011323
1280.278053491304	370.3029890819463	147.7447316869673	91.26892299454664
1281.3195264392068	368.50312045569876	141.92415223306267	94.86866024704175
1276.1363519998722	379.13327830389954	137.44822997722582	103.29288681965188
1250.5550124729807	382.54256021645386	147.01278489761637	104.0376182915237
1223.1778118642221	387.0772947212389	138.7425198967835	114.6633574751879
1215.8020029494464	369.21762537124494	129.57731481251824	122.47973610905615
1205.4761160032251	355.68202878958607	126.41503508945708	121.76786672095261
1137.063802460814	346.48672825377406	153.80947817552396	108.89270093578946
1113.8069283684238	343.9262799782888	171.46994998181955	101.64790761026644
1112.3462143167114	340.5287969581816	174.391378085244	99.91130089787289
1098.4068031828938	331.6162841265119	180.87153733419376	100.6173961462638
1086.2575934898578	317.6478954822574	174.45658718011805	102.22842811464622
1085.5674486574612	316.6304139245879	171.51690817379784	99.94342255887148
1085.8620179221493	298.5712897228484	170.92776964442126	93.68511975154397
1085.302026003391	298.7101460901529	176.17026131875593	93.40740701693505
1086.1445678803589	287.4294243695143	174.4851775648197	94.99384152457817
954.7539027482553	344.0253732385227	177.0306921218106	103.5251479076787
1017.9337376193004	366.9954698121541	151.41396303929534	123.2868725818777
1061.3326123684842	366.7612815373627	142.38205341637837	123.75524913146045
1082.6218096264927	382.5027207385716	129.1236596643697	134.15808610619752
1078.3968404266652	390.88684260212676	125.13565891109533	146.4117004025889
1078.5548512955334	452.7345259269172	120.54658356587265	159.45404919258823
1088.3535746409066	469.384494323545	131.74076082632962	161.34453977213684
1033.1766898239982	457.2607478144422	122.24423974955394	153.32464682979824
1138.4961778535699	551.0206803319836	119.5778169879251	165.11181203816665
1212.8465681368582	631.5021420313161	100.47635383991194	205.25127773727283
1290.3742217371168	702.3295200677626	92.46640153754232	215.385275107629
1411.1970155211254	730.8493576905412	112.09630065116906	186.84838022734203
1309.1014313094809	784.6919431687162	143.466017203968	149.22596002929862
1415.0814856917125	913.6736424902554	143.52447802135748	149.3721243554323
1453.5175899243293	936.3773893501127	154.2862563713009	136.25083630446704
1392.6563943135202	940.6923939765771	170.82544137960986	127.62082705153821
1396.1135117558001	946.1958222192359	173.28643252601418	121.30158358170297
1414.991099641085	949.6296829022136	181.74213534348132	114.43386221574747
1423.0017180212922	993.2318008811121	198.15876026093423	92.10534961368546
1442.1234966243626	985.5999738598422	186.88018905277076	93.88651065723683
1475.3185626780803	970.9541437399444	181.53663588893278	101.37582127431921
1485.2049631691254	992.6686642365019	183.81572128090158	88.81942120488655
1492.6345602162826	990.8656426840053	181.63994736752105	88.19765758290167
1481.0292710877914	971.9144998346759	175.55392159517726	96.80333925223441
1524.7004930349185	991.9728599459374	185.82418192704597	86.39483335940079
1537.6659602483555	989.5135194937236	172.53769877067583	91.31351426382844
1539.649926838032	1009.9493808963696	172.67538705667226	79.18114171597969
1559.9376804447354	983.8109532470917	163.27847962702162	84.69009733890054
1549.0528691901638	992.7675361226067	154.20269519611193	82.19963505789723
1539.17947960982	1012.0505606628466	162.91113138235266	69.38971958445987
1551.5431341590515	1011.8744998142024	159.68421919795207	66.15844179607112
1557.7820033794721	1004.5656645534667	147.2064807571108	73.81711156294678
